# Supplementary material for: NHR-14 loss of function couples intestinal iron uptake with innate immunity in C. elegans through PQM-1 signaling
Source: eLife journal article supplement (doi:10.7554/elife.44674), 2019-09-18
Supplement: supp [file elife-44674-supp-v1.zip]

Archive with 14 entries (14 files):
- elife_poa_e44674_Figure_5_source_data_1.xls
- elife_poa_e44674_Figure_4_figure_supplement_2.pdf
- elife_poa_e44674_Figure_2_figure_supplement_1.pdf
- elife_poa_e44674_Figure_6_source_data_1.xlsx
- elife_poa_e44674_Figure_4_figure_supplement_3.pdf
- elife_poa_e44674_Figure_6_source_data_2.xlsx
- elife_poa_e44674_Figure_6_source_data_3.xlsx
- elife_poa_e44674_Figure_3_source_data_1.xlsx
- elife_poa_e44674_Figure_8_source_data_1.xlsx
- elife_poa_e44674_Figure_2_figure_supplement_2.pdf
- elife_poa_e44674_Supplementary_file_1.docx
- elife_poa_e44674_Figure_6_source_data_4.xls
- elife_poa_e44674_Figure_4_figure_supplement_1.pdf
- elife_poa_e44674_Transparent_Reporting_File.docx
