# Supplementary material for: NHR-14 loss of function couples intestinal iron uptake with innate immunity in C. elegans through PQM-1 signaling
Source: eLife journal article supplement (doi:10.7554/elife.44674), 2019-09-18
Supplement: supp [file elife-44674-supp-v1.zip › elife_poa_e44674_Figure_3_source_data_1.xlsx]

## Sheet: summary
contrast	summary	count	percent
tm1473_NGM.vs.N2_NGM	up-regulated	573	3.03
tm1473_NGM.vs.N2_NGM	down-regulated	261	1.38
tm1473_NGM.vs.N2_NGM	outliers	0	0
tm1473_NGM.vs.N2_NGM	low counts <	2931	15.51

## Sheet: nhr-14(tm1473) vs N2 
Gene ID	gene_name	biotype	chromosome	start	description	baseMean	log2FoldChange	lfcSE	stat	pvalue	padj
WBGene00007873	dod-21	protein_coding	IV	12936738	Downstream Of DAF-16 (regulated by DAF-16)	13073.6	10.2676	0.232018	36.5172	5.91148e-292	9.43827e-288
WBGene00017806	F26A1.8	protein_coding	III	4820798		3182.3	8.40341	0.205937	33.4379	3.86243e-245	3.08338e-241
WBGene00003613	nhr-14	protein_coding	X	8473723	Nuclear hormone receptor family member nhr-14	2869.7	3.83109	0.0876641	32.3281	2.81624e-229	1.4988e-225
WBGene00004878	smf-3	protein_coding	IV	2619875	yeast SMF (divalent cation transporter) homolog	14527.3	3.50607	0.0928948	27.0158	9.63138e-161	3.84437e-157
WBGene00006628	tsp-2	protein_coding	III	8236917	TetraSPanin family	1622.87	4.05962	0.115567	26.4298	6.23381e-154	1.99058e-150
WBGene00012961	Y47H10A.5	protein_coding	I	12095735		2548.09	4.05691	0.118938	25.6967	1.27122e-145	3.38271e-142
WBGene00006627	tsp-1	protein_coding	III	8237995	Tetraspanin-1	2865.26	3.51204	0.10657	23.5894	4.94616e-123	1.12815e-119
WBGene00011844	T19C9.8	protein_coding	V	17239097		1591.21	5.58265	0.199578	22.6607	1.09522e-113	2.18579e-110
WBGene00008199	C49C3.9	protein_coding	IV	17339656		2873.28	2.90321	0.0849444	22.4504	1.26757e-111	2.24867e-108
WBGene00012186	mlt-11	protein_coding	V	20667211		593.445	-6.20832	0.229158	-21.9914	3.47873e-107	5.55414e-104
WBGene00009926	noah-2	protein_coding	IV	14091254	NOmpA Homolog (Drosophila nompA: no mechanoreceptor potential A)	436.446	-5.24319	0.189482	-21.9381	1.12539e-106	1.63346e-103
WBGene00007097	B0024.4	protein_coding	V	10297399		5812.26	7.43889	0.288731	21.8883	3.35944e-106	4.46973e-103
WBGene00009898	dod-23	protein_coding	II	8398160	Downstream Of DAF-16 (regulated by DAF-16)	12919.4	3.13785	0.100628	21.3041	1.04025e-100	1.27759e-97
WBGene00007875	dod-24	protein_coding	IV	12940142	Downstream Of DAF-16 (regulated by DAF-16)	3593.05	3.91007	0.138621	21.0641	1.69996e-98	1.93868e-95
WBGene00045416	Y37H2A.14	protein_coding	V	18143738		3265.21	4.12251	0.148211	21.0062	5.7567e-98	6.12743e-95
WBGene00012683	asp-17	protein_coding	V	19035715	ASpartyl Protease	988.165	6.33801	0.240795	20.6026	2.60205e-94	2.59652e-91
WBGene00016422	noah-1	protein_coding	I	5874433	NOmpA Homolog (Drosophila nompA: no mechanoreceptor potential A)	618.727	-4.20515	0.158289	-20.1982	1.0162e-90	9.5439e-88
WBGene00022644	dod-19	protein_coding	V	411779	Downstream Of DAF-16 (regulated by DAF-16)	10390.3	3.09027	0.104313	20.1001	7.36884e-90	6.53616e-87
WBGene00007153	clec-41	protein_coding	V	13134965	C-type LECtin	8786.75	3.31972	0.118182	19.6983	2.23135e-86	1.87504e-83
WBGene00015759	C14C6.5	protein_coding	V	536628		1060.81	3.20875	0.119529	18.5322	1.135e-76	9.06068e-74
WBGene00006366	sym-1	protein_coding	X	14581654	SYM-1 protein; Uncharacterized protein	307.239	-4.75251	0.203092	-18.1446	1.41711e-73	1.07741e-70
WBGene00003096	lys-7	protein_coding	V	3481419	LYSozyme	4896.14	3.31827	0.12907	18.0366	1.00476e-72	7.29179e-70
WBGene00045457	F33H12.7	protein_coding	II	2586077		2021.45	3.30384	0.130453	17.7188	3.00217e-70	2.08403e-67
WBGene00021236	pud-1.2	protein_coding	V	2322038	Protein Up-regulated in Daf-2(gf)	11465.4	-3.01129	0.114632	-17.6099	2.06833e-69	1.37596e-66
WBGene00194848	T27D12.6	protein_coding	II	11835586		419.481	5.27063	0.23523	17.3475	2.06117e-67	1.31635e-64
WBGene00017501	pud-3	protein_coding	V	2324510	Protein Up-regulated in Daf-2(gf)	2178.39	-4.75713	0.217487	-17.3339	2.60941e-67	1.60238e-64
WBGene00017490	pud-2.1	protein_coding	V	2329444	Protein Up-regulated in Daf-2(gf)	17586.1	-3.31692	0.13574	-17.1466	6.6666e-66	3.94218e-63
WBGene00018823	F54E2.1	protein_coding	V	2810427		8480.35	2.42135	0.0835864	17.0548	3.22124e-65	1.8368e-62
WBGene00012261	lpr-3	protein_coding	X	11057436	LiPocalin-Related protein	258.478	-5.86411	0.27342	-16.8109	2.02928e-63	1.11722e-60
WBGene00010660	K08D8.6	protein_coding	IV	12887060		5736.34	2.1854	0.0730635	16.2682	1.6597e-59	8.83293e-57
WBGene00008850	F15B9.6	protein_coding	V	13014144		697.98	4.06595	0.187552	16.1816	6.79557e-59	3.49994e-56
WBGene00008602	oac-14	protein_coding	X	10139374	O-ACyltransferase homolog	1819.41	3.6293	0.165133	15.9959	1.3654e-57	6.81248e-55
WBGene00005016	sqt-1	protein_coding	II	11336691	Cuticle collagen sqt-1	211.622	-5.54837	0.271866	-15.8843	8.14553e-57	3.94095e-54
WBGene00018921	sago-2	protein_coding	I	618207	Piwi-like protein	1177.41	3.02971	0.128843	15.8216	2.2098e-56	1.03769e-53
WBGene00009710	F44G3.10	protein_coding	V	16138761		911.097	4.83497	0.23356	15.8077	2.75346e-56	1.25605e-53
WBGene00016064	acd-1	protein_coding	I	4103713		191.6	4.6339	0.225102	15.7422	7.76619e-56	3.44431e-53
WBGene00010749	K10D11.5	protein_coding	IV	12989685		1248.31	2.81467	0.115956	15.7131	1.23011e-55	5.3081e-53
WBGene00005017	sqt-2	protein_coding	II	23328	SQuaT	204.882	-4.92006	0.24307	-15.6499	3.32562e-55	1.39729e-52
WBGene00000606	col-17	protein_coding	II	4866436	COLlagen	233.635	-5.66956	0.283927	-15.6019	7.06054e-55	2.89047e-52
WBGene00012101	zip-10	protein_coding	V	11650078	bZIP transcription factor family	1161.88	2.57354	0.102288	15.4401	8.79799e-54	3.51172e-51
WBGene00017498	pud-4	protein_coding	V	2326678	Protein Up-regulated in Daf-2(gf)	856.566	-4.64842	0.235962	-15.3953	1.76031e-53	6.8549e-51
WBGene00004264	qua-1	protein_coding	II	8198803	QUAhog (hedgehog related)	219.905	-4.3725	0.219669	-15.0582	3.04953e-51	1.15926e-48
WBGene00012256	lpr-5	protein_coding	X	11062132	LiPocalin-Related protein	186.337	-5.23963	0.270435	-15.0035	6.96249e-51	2.58519e-48
WBGene00002058	ifd-2	protein_coding	X	813852	Intermediate filament protein ifd-2	1381.43	2.56357	0.105647	14.8602	5.97892e-50	2.16953e-47
WBGene00018572	lin-42	protein_coding	II	1233244	Period protein homolog lin-42	185.724	-4.17456	0.214909	-14.5299	7.8362e-48	2.78029e-45
WBGene00002271	lec-8	protein_coding	X	9850209	Probable galaptin lec-8	13634	2.17663	0.0816208	14.4647	2.0248e-47	7.02783e-45
WBGene00021872	clec-85	protein_coding	IV	2854346	C-type LECtin	2485.04	2.69244	0.118313	14.3743	7.50694e-47	2.55012e-44
WBGene00013119	Y51H4A.25	protein_coding	IV	16736264		807.503	2.38699	0.097314	14.3058	2.01453e-46	6.70082e-44
WBGene00000783	cpr-3	protein_coding	V	15296834	Cathepsin B-like cysteine proteinase 3	5417.72	2.42396	0.100545	14.2232	6.58188e-46	2.14462e-43
WBGene00020760	T24C4.4	protein_coding	III	872622		1950.94	2.62464	0.115065	14.1886	1.07823e-45	3.44302e-43
WBGene00022645	ZK6.11	protein_coding	V	415713		10145.6	2.85337	0.132703	14.0467	8.07524e-45	2.52803e-42
WBGene00020674	T22B7.7	protein_coding	X	5651870		1159.42	-4.12896	0.224656	-14.0177	1.21463e-44	3.72939e-42
WBGene00022816	fbn-1	protein_coding	III	7625376	FiBrilliN homolog	214.857	-3.68939	0.191192	-13.9636	2.59801e-44	7.82639e-42
WBGene00002090	ins-7	protein_coding	IV	9682011	Probable insulin-like peptide beta-type 4	272.233	3.76378	0.198034	13.9459	3.33063e-44	9.84758e-42
WBGene00004398	rol-8	protein_coding	II	7544106	Cuticle collagen 6	151.522	-5.40612	0.296533	-13.9013	6.21777e-44	1.80496e-41
WBGene00016004	C18H9.6	protein_coding	II	6700658		2099.11	2.32265	0.0968248	13.7184	7.87359e-43	2.24482e-40
WBGene00011190	swt-6	protein_coding	V	13954277	SWEET sugar transporter family	1678.5	2.80835	0.133752	13.5992	4.05045e-42	1.13455e-39
WBGene00008483	E04D5.4	protein_coding	II	10440286		374.983	4.37265	0.243236	13.5609	6.83063e-42	1.88031e-39
WBGene00019261	H34I24.2	protein_coding	III	2842044		4484.76	2.04065	0.0770306	13.5553	7.37067e-42	1.99458e-39
WBGene00019744	M02H5.8	protein_coding	V	449963		2332.64	2.75029	0.130551	13.4845	1.92858e-41	5.13195e-39
WBGene00004811	skr-5	protein_coding	V	17347906	SKp1 Related (ubiquitin ligase complex component)	261.048	4.11282	0.226431	13.4768	2.14254e-41	5.60782e-39
WBGene00000522	clc-1	protein_coding	X	11047415	CLaudin-like in Caenorhabditis	3346.91	2.40092	0.105659	13.3235	1.69022e-40	4.35258e-38
WBGene00004397	rol-6	protein_coding	II	8733050	Cuticle collagen rol-6	137.203	-4.92983	0.282546	-13.2838	2.8731e-40	7.28126e-38
WBGene00009488	oac-20	protein_coding	V	15978716	O-ACyltransferase homolog	866.094	3.04179	0.155548	13.2106	7.62339e-40	1.9018e-37
WBGene00010953	clec-190	protein_coding	IV	15124933	C-type LECtin	1005.83	-2.53894	0.119596	-12.9155	3.68044e-38	9.04029e-36
WBGene00018418	F44E2.4	protein_coding	III	8832467		199.398	-3.72299	0.209378	-12.9068	4.12178e-38	9.97097e-36
WBGene00012257	lpr-4	protein_coding	X	11065133	LiPocalin-Related protein	160.942	-4.63035	0.279518	-12.654	1.06256e-36	2.53207e-34
WBGene00007479	C09F9.2	protein_coding	II	14705516		154.797	-4.8392	0.294874	-12.5524	3.85877e-36	9.06016e-34
WBGene00021095	mlt-8	protein_coding	II	569269		215.62	-3.36096	0.1913	-12.3023	8.8e-35	2.03624e-32
WBGene00019272	H42K12.3	protein_coding	X	1311605		116.497	-4.91831	0.30395	-12.2119	2.68539e-34	6.12498e-32
WBGene00005003	spp-18	protein_coding	IV	9593693	SaPosin-like Protein family	1162.47	2.57813	0.130553	12.1597	5.09192e-34	1.14504e-31
WBGene00001070	dpy-8	protein_coding	X	5148678	DumPY: shorter than wild-type	150.944	-4.20568	0.260395	-12.0648	1.62077e-33	3.59405e-31
WBGene00001064	dpy-2	protein_coding	II	6714292	Cuticle collagen dpy-2	140.207	-4.05137	0.249697	-12.0008	3.51683e-33	7.69174e-31
WBGene00010605	K06G5.1	protein_coding	X	14214939		10782.9	1.70247	0.0592757	11.8863	1.3937e-32	3.00701e-30
WBGene00012648	Y39A1A.9	protein_coding	III	10630078		104.316	-4.226	0.264374	-11.7533	6.79215e-32	1.44591e-29
WBGene00007872	C32H11.9	protein_coding	IV	12935051	Downstream Of DAF-16 (Regulated by DAF-16)	6688.36	9.98805	0.470365	11.6322	2.8278e-31	5.9406e-29
WBGene00001770	gst-22	protein_coding	V	16231034	Glutathione S-Transferase	1245.28	2.3485	0.116659	11.6294	2.91991e-31	6.05444e-29
WBGene00022103	cdh-12	protein_coding	III	1152044	CaDHerin family	155.646	-3.99247	0.254869	-11.5495	7.42814e-31	1.52048e-28
WBGene00206354	F27E5.9	protein_coding	II	10134938		349.796	2.85097	0.161521	11.5215	1.02844e-30	2.07848e-28
WBGene00009984	F53F1.6	protein_coding	V	13416099		365.824	2.94788	0.170401	11.5048	1.24767e-30	2.49003e-28
WBGene00022679	ZK180.5	protein_coding	IV	4515039		166.223	-4.80419	0.325232	-11.3791	5.3159e-30	1.04782e-27
WBGene00008301	dct-3	protein_coding	V	12441665	DAF-16/FOXO Controlled, germline Tumor affecting	202.17	5.42491	0.329053	11.3757	5.52286e-30	1.07534e-27
WBGene00012255	lpr-6	protein_coding	X	11059994	LiPocalin-Related protein	92.3728	-4.31646	0.280417	-11.3585	6.72801e-30	1.29421e-27
WBGene00001069	dpy-7	protein_coding	X	7536460	Cuticle collagen dpy-7	110.175	-4.1677	0.271444	-11.3512	7.31109e-30	1.38963e-27
WBGene00021518	hpo-6	protein_coding	IV	1562184		3042.4	1.91612	0.0813355	11.314	1.11813e-29	2.10023e-27
WBGene00015216	valv-1	protein_coding	IV	7444634		563.198	2.73988	0.15561	11.265	1.95409e-29	3.62779e-27
WBGene00005018	sqt-3	protein_coding	V	12352994	Cuticle collagen 1	421.701	-3.71101	0.243127	-11.214	3.48078e-29	6.38783e-27
WBGene00010747	K10D11.3	protein_coding	IV	12982120		139.583	3.60156	0.230861	11.1637	6.13796e-29	1.11362e-26
WBGene00016450	clec-5	protein_coding	III	4881914	C-type LECtin	760.876	2.50104	0.135497	11.1542	6.8321e-29	1.22563e-26
WBGene00001074	dpy-13	protein_coding	IV	4235614	Cuticle collagen dpy-13	172.183	-4.03407	0.270018	-11.127	9.26955e-29	1.64442e-26
WBGene00015933	C17H12.8	protein_coding	IV	6818606		2774.8	2.61946	0.147404	11.0762	1.63598e-28	2.87034e-26
WBGene00011262	pho-8	protein_coding	V	11833629	intestinal acid PHOsphatase	77.4864	4.60212	0.313863	11.0217	3.00305e-28	5.2116e-26
WBGene00000618	col-41	protein_coding	X	15175039	COLlagen	121.33	-6.10587	0.400154	-10.979	4.82055e-28	8.27579e-26
WBGene00044206	T26H5.9	protein_coding	V	15444910		729.257	3.56959	0.235827	10.96	5.94887e-28	1.01042e-25
WBGene00021448	Y39D8A.1	protein_coding	V	419687		366.695	2.52565	0.140842	10.8993	1.16117e-27	1.9515e-25
WBGene00008605	mlt-9	protein_coding	X	15101787		108.781	-4.15973	0.281313	-10.8841	1.37268e-27	2.28293e-25
WBGene00003090	lys-1	protein_coding	V	10277827	LYSozyme	25884.5	1.81754	0.0755189	10.8707	1.58913e-27	2.61567e-25
WBGene00008988	F20G2.5	protein_coding	V	13771508		386.401	2.96242	0.18266	10.7832	4.13199e-27	6.73177e-25
WBGene00004219	ptr-4	protein_coding	X	6060757	PaTched Related family	134.196	-4.21709	0.297163	-10.6234	2.31965e-26	3.74096e-24
WBGene00138721	C54D10.14	protein_coding	V	12437499		178.395	4.4678	0.305293	10.6023	2.90661e-26	4.64069e-24
WBGene00009433	F35E12.9	protein_coding	V	13741321		1867.93	2.19942	0.1141	10.5854	3.48413e-26	5.50769e-24
WBGene00001158	ech-9	protein_coding	IV	10233320	Enoyl-CoA Hydratase	426.584	3.70653	0.257895	10.515	7.36637e-26	1.15305e-23
WBGene00044623	bus-8	protein_coding	X	5492976	Glycosyltransferase; Uncharacterized protein	83.0794	-4.21718	0.293338	-10.5051	8.18209e-26	1.2683e-23
WBGene00001072	dpy-10	protein_coding	II	6710150	Cuticle collagen dpy-10	183.11	-2.83525	0.174871	-10.4742	1.13515e-25	1.74267e-23
WBGene00001684	gpd-2	protein_coding	X	3113434	Glyceraldehyde-3-phosphate dehydrogenase 2	3875.38	-2.83961	0.177791	-10.4504	1.45845e-25	2.21768e-23
WBGene00017640	F20D6.11	protein_coding	V	8196770		1673.89	1.82789	0.0796586	10.4424	1.58782e-25	2.39161e-23
WBGene00000928	dao-2	protein_coding	II	4562853	Dauer or Aging adult Overexpression	274.967	-3.69881	0.260867	-10.3765	3.17065e-25	4.73108e-23
WBGene00007913	cyp-36A1	protein_coding	I	8341709	Probable cytochrome P450 CYP36A1	621.044	2.47628	0.144715	10.2852	8.21534e-25	1.2145e-22
WBGene00000740	col-167	protein_coding	X	6323297	COLlagen	419.769	-2.60688	0.157786	-10.2152	1.69451e-24	2.48207e-22
WBGene00014183	ZK1025.3	protein_coding	I	11460780		77.642	-4.44016	0.321842	-10.127	4.19223e-24	6.08484e-22
WBGene00009393	clec-62	protein_coding	II	12893064	C-type LECtin	1807.86	2.20231	0.119816	10.1061	5.19107e-24	7.46672e-22
WBGene00001066	dpy-4	protein_coding	IV	14985543	DumPY: shorter than wild-type	140.507	-3.89424	0.284023	-10.0881	6.2359e-24	8.8895e-22
WBGene00000402	cdh-10	protein_coding	IV	2436515	CaDHerin family	98.1686	-3.62463	0.25435	-10.0788	6.85711e-24	9.68855e-22
WBGene00008677	F11A5.9	protein_coding	V	16214890		3038.09	1.96268	0.0966063	10.0218	1.22239e-23	1.71199e-21
WBGene00017892	F28B4.3	protein_coding	X	3227489		7964.39	1.83616	0.0840314	10.0008	1.51122e-23	2.0981e-21
WBGene00009983	cut-2	protein_coding	V	13415062	Cuticlin-2	98.0548	-5.12351	0.380001	-9.90054	4.14021e-23	5.69849e-21
WBGene00021503	ctsa-2	protein_coding	III	6612523	CaThepSin A homolog	2015.32	1.78109	0.0795396	9.86858	5.69662e-23	7.77369e-21
WBGene00009094	F23H12.5	protein_coding	V	12358647		109.998	-3.28449	0.231142	-9.78335	1.32747e-22	1.79613e-20
WBGene00001725	grl-16	protein_coding	I	572177	GRound-Like (grd related)	128.501	-4.13989	0.316632	-9.74454	1.94653e-22	2.61163e-20
WBGene00004120	pqn-32	protein_coding	II	13108019	Prion-like-(Q/N-rich)-domain-bearing protein	93.5137	-4.07204	0.307205	-9.72315	2.40231e-22	3.19627e-20
WBGene00007833	oac-6	protein_coding	V	16302748	O-ACyltransferase homolog	1787.57	2.50541	0.15833	9.6085	7.36141e-22	9.71341e-20
WBGene00013923	ghi-1	protein_coding	II	11646747	Glycoprotein Hormone (FLR-2) Interacting protein	208.764	2.75579	0.185491	9.52267	1.68788e-21	2.20891e-19
WBGene00008494	F01D5.3	protein_coding	II	13999158		209.953	2.44288	0.153803	9.45454	3.24455e-21	4.21158e-19
WBGene00044998	M199.9	protein_coding	IV	15127491		102.065	-3.69737	0.281316	-9.44458	3.5682e-21	4.59435e-19
WBGene00009394	clec-63	protein_coding	II	12895638	C-type LECtin	30547.9	2.08396	0.116579	9.36787	7.40141e-21	9.45368e-19
WBGene00000722	col-149	protein_coding	V	10291696	COLlagen	109.178	-2.8958	0.20095	-9.36195	7.8276e-21	9.91869e-19
WBGene00000665	col-90	protein_coding	III	7948838	Putative cuticle collagen 90	104.842	-3.90376	0.307293	-9.29362	1.49133e-20	1.87485e-18
WBGene00015859	C16D9.4	protein_coding	V	8240931		414.555	2.31228	0.143078	9.25398	2.16289e-20	2.69787e-18
WBGene00000705	col-131	protein_coding	IV	13065729	COLlagen	58.9433	-4.43785	0.346037	-9.22546	2.82358e-20	3.49467e-18
WBGene00044469	clec-173	protein_coding	IV	3266203	C-type LECtin	619.782	1.9761	0.106767	9.20651	3.36888e-20	4.1375e-18
WBGene00001065	dpy-3	protein_coding	X	2144602	DumPY: shorter than wild-type	71.1139	-5.8378	0.429948	-9.16941	4.75633e-20	5.79691e-18
WBGene00001071	dpy-9	protein_coding	IV	257382	DumPY: shorter than wild-type	85.3805	-4.17516	0.334976	-9.16065	5.15839e-20	6.23931e-18
WBGene00008492	F01D5.1	protein_coding	II	13996954		335.613	2.72212	0.189993	9.15956	5.21111e-20	6.25568e-18
WBGene00017991	clec-180	protein_coding	IV	7568902	C-type lectin domain-containing protein 180	84.9154	-3.89242	0.308813	-9.14579	5.9198e-20	7.05339e-18
WBGene00001067	dpy-5	protein_coding	I	5432158	Cuticle collagen dpy-5	170.435	-3.79268	0.306617	-9.11552	7.82927e-20	9.25941e-18
WBGene00019682	K12H4.7	protein_coding	III	8048424	Putative serine protease K12H4.7	11903.3	1.74381	0.0829346	9.0177	1.92079e-19	2.25495e-17
WBGene00009971	F53C11.1	protein_coding	V	13775751		2118.07	1.89963	0.100487	9.0146	1.97589e-19	2.3027e-17
WBGene00017998	F33D4.6	protein_coding	IV	7714164		77.4599	-4.15527	0.342349	-8.92946	4.2809e-19	4.95281e-17
WBGene00009192	F27E5.1	protein_coding	II	10139590		2032.47	1.84757	0.0960933	8.87657	6.89547e-19	7.92036e-17
WBGene00018725	kreg-1	protein_coding	X	8709705	Kgb-1(KGB-1) REgulated Genes	574.096	2.57534	0.181398	8.79782	1.39501e-18	1.59091e-16
WBGene00002282	let-4	protein_coding	X	14577953	Leucine-rich repeat-containing protein let-4	63.0302	-3.77155	0.303193	-8.79304	1.45571e-18	1.64835e-16
WBGene00021625	Y47D7A.13	protein_coding	V	4434882		92.979	-4.25228	0.35804	-8.78415	1.57558e-18	1.77152e-16
WBGene00004133	abu-13	protein_coding	III	6941888	Activated in Blocked Unfolded protein response	62.9646	-3.80913	0.306976	-8.72587	2.64151e-18	2.94926e-16
WBGene00077770	M04D5.3	protein_coding	I	11339778		749.196	1.88893	0.103062	8.68714	3.71684e-18	4.12105e-16
WBGene00001068	dpy-6	protein_coding	X	8450378	DumPY: shorter than wild-type	158.71	-2.66605	0.194159	-8.60338	7.74004e-18	8.52258e-16
WBGene00019148	H03E18.1	protein_coding	X	8507876		101.57	-3.23299	0.258766	-8.57327	1.0059e-17	1.10001e-15
WBGene00010901	M28.10	protein_coding	II	10647516		3635.26	1.68578	0.0804594	8.57133	1.02299e-17	1.11109e-15
WBGene00003175	mec-12	protein_coding	III	3131574	Tubulin alpha-3 chain	804.142	-1.85716	0.100688	-8.55303	1.19897e-17	1.29343e-15
WBGene00010256	hrg-3	protein_coding	V	9756467	Heme Responsive Gene	964.222	2.36044	0.161289	8.54518	1.28341e-17	1.37523e-15
WBGene00015602	fbxa-158	protein_coding	II	1619797	F-box A protein	130.332	3.53163	0.292884	8.49015	2.06371e-17	2.19661e-15
WBGene00008621	F09C8.1	protein_coding	X	16159648		1213.44	2.02208	0.122029	8.44349	3.08009e-17	3.25673e-15
WBGene00016218	C29F9.3	protein_coding	III	124778		646.062	1.85311	0.101809	8.44163	3.12948e-17	3.28719e-15
WBGene00014182	ZK1025.2	protein_coding	I	11449856		55.7174	-4.49307	0.382166	-8.42595	3.57836e-17	3.73412e-15
WBGene00012501	Y26D4A.3	protein_coding	I	13072102		115.699	4.16285	0.345109	8.35452	6.57005e-17	6.81152e-15
WBGene00000699	col-125	protein_coding	IV	11225505	COLlagen	200.645	-3.13127	0.258093	-8.33023	8.06822e-17	8.31079e-15
WBGene00020194	T03G6.1	protein_coding	X	2608228		65.6358	-3.76168	0.321517	-8.30426	1.0044e-16	1.02797e-14
WBGene00018969	F56D3.1	protein_coding	II	4142816		80.1804	-3.3013	0.273336	-8.30341	1.01166e-16	1.0288e-14
WBGene00007440	C08E8.4	protein_coding	V	18371846		1332.28	2.51556	0.186675	8.24782	1.61311e-16	1.63006e-14
WBGene00044696	F52E1.14	protein_coding	V	8383922		6719.7	1.86348	0.106166	8.19626	2.47986e-16	2.49015e-14
WBGene00019605	ctsa-1	protein_coding	II	6366991	Uncharacterized serine carboxypeptidase K10B2.2	1484.01	1.77776	0.095675	8.19192	2.57093e-16	2.56547e-14
WBGene00004134	myrf-1	protein_coding	II	10497055	myelin regulatory factor related	518.293	-2.11319	0.137286	-8.17205	3.032e-16	3.00677e-14
WBGene00020580	T19D12.5	protein_coding	II	6634915		176.543	2.83132	0.226509	8.15743	3.42236e-16	3.37292e-14
WBGene00000799	crn-6	protein_coding	III	9367243	Cell death-related nuclease 6	273.136	2.10757	0.137064	8.15452	3.50561e-16	3.43378e-14
WBGene00000039	acn-1	protein_coding	X	5092281	Inactive angiotensin-converting enzyme-related protein	195.626	-2.54209	0.189868	-8.13778	4.02588e-16	3.91934e-14
WBGene00007999	tag-297	protein_coding	II	14627630		88.8211	-3.08347	0.254098	-8.1349	4.1229e-16	3.98946e-14
WBGene00017764	F25A2.1	protein_coding	V	1179604		105.573	3.43045	0.293734	8.1336	4.16723e-16	4.00807e-14
WBGene00010750	K10D11.6	protein_coding	IV	12986751		143.597	2.60842	0.201589	8.06328	7.42729e-16	7.10085e-14
WBGene00019660	K11H12.4	protein_coding	IV	674038		2132.05	1.82987	0.10385	8.05734	7.79756e-16	7.41046e-14
WBGene00010977	R02D5.3	protein_coding	V	14483160		437.595	2.01597	0.127352	8.05404	8.01027e-16	7.56757e-14
WBGene00001786	gst-38	protein_coding	V	15915168	Glutathione S-Transferase	262.189	2.12659	0.142126	8.00287	1.2155e-15	1.14157e-13
WBGene00006948	wrt-2	protein_coding	X	3092395	WaRThog (hedgehog-like family)	44.918	-4.17032	0.366666	-7.99605	1.28476e-15	1.19956e-13
WBGene00020579	T19D12.4	protein_coding	II	6631154		9824.31	1.54735	0.0692101	7.95048	1.85787e-15	1.72458e-13
WBGene00009682	msd-2	protein_coding	IV	10029056	Major Sperm protein Domain containing	118.473	3.61486	0.319882	7.94923	1.87681e-15	1.73209e-13
WBGene00045400	C54D10.13	protein_coding	V	12431368		204.457	2.36109	0.173609	7.93369	2.12722e-15	1.9519e-13
WBGene00020981	W03D2.6	protein_coding	IV	4057300		212.006	2.37124	0.174818	7.93149	2.16537e-15	1.97556e-13
WBGene00016219	C29F9.4	protein_coding	III	120492		696.721	1.89861	0.114668	7.90655	2.64615e-15	2.40048e-13
WBGene00012910	Y46G5A.20	protein_coding	II	12811037		185.592	2.53217	0.197009	7.87235	3.48049e-15	3.13952e-13
WBGene00016190	C28G1.5	protein_coding	X	8826632		1006.83	1.75545	0.097235	7.82868	4.93035e-15	4.42236e-13
WBGene00022680	ZK180.6	protein_coding	IV	4520181		67.5532	-3.37224	0.297013	-7.8271	4.99237e-15	4.45297e-13
WBGene00016425	C34H4.2	protein_coding	IV	1553790		2749.55	1.76403	0.0985112	7.81831	5.35376e-15	4.74879e-13
WBGene00003057	lon-3	protein_coding	V	12197433	Cuticle collagen lon-3	53.9316	-3.74832	0.339005	-7.79543	6.41909e-15	5.66228e-13
WBGene00001716	grl-7	protein_coding	V	11344817	GRound-Like (grd related)	57.9621	-3.80872	0.347619	-7.79327	6.52957e-15	5.72809e-13
WBGene00020954	W02G9.4	protein_coding	V	2666866		506.901	2.07084	0.139143	7.78013	7.24522e-15	6.32116e-13
WBGene00019520	K08B12.1	protein_coding	V	6259407		49.3654	-3.8875	0.355237	-7.71883	1.17405e-14	1.01874e-12
WBGene00044280	W02A2.9	protein_coding	IV	13347687		540.971	2.12302	0.147735	7.70178	1.34186e-14	1.15806e-12
WBGene00044212	Y68A4A.13	protein_coding	V	17207210		145.767	4.63484	0.386223	7.69841	1.37765e-14	1.18255e-12
WBGene00009431	dct-17	protein_coding	V	13727761	DAF-16/FOXO Controlled, germline Tumor affecting	1146.41	2.01325	0.133221	7.68778	1.49709e-14	1.27821e-12
WBGene00019855	R03H10.2	protein_coding	II	4155772		81.0264	-2.89081	0.243607	-7.68506	1.52922e-14	1.2987e-12
WBGene00007932	zip-5	protein_coding	V	13264546	bZIP transcription factor family	1308.81	1.99859	0.13157	7.673	1.68021e-14	1.41938e-12
WBGene00006534	tba-8	protein_coding	X	9455489	Tubulin alpha-8 chain	39.2026	-4.53779	0.4102	-7.67205	1.69265e-14	1.42236e-12
WBGene00021121	W09G12.7	protein_coding	IV	1229080		1654.09	2.19212	0.158721	7.63882	2.19219e-14	1.83249e-12
WBGene00021487	comt-3	protein_coding	V	2057629	Catechol-O-MethylTransferase family	2166.39	1.87138	0.115679	7.61092	2.72159e-14	2.26318e-12
WBGene00011979	T24B8.5	protein_coding	II	9082682		629.371	2.74545	0.23398	7.59814	3.00412e-14	2.48517e-12
WBGene00044468	Y69A2AL.2	protein_coding	IV	2482257	Phospholipase A(2)	2199.45	1.8635	0.114837	7.5887	3.23121e-14	2.65925e-12
WBGene00000745	col-172	protein_coding	X	6672830	COLlagen	55.7437	-3.62283	0.332139	-7.57922	3.47628e-14	2.84627e-12
WBGene00004058	pmp-1	protein_coding	II	6880701	Peroxisomal Membrane Protein related	966.387	1.80649	0.107734	7.54804	4.4185e-14	3.59927e-12
WBGene00022274	Y73E7A.8	protein_coding	I	1634740		43.7374	-4.0461	0.372716	-7.50189	6.29057e-14	5.09824e-12
WBGene00007490	mks-5	protein_coding	II	10720231		52.4276	-4.82285	0.493508	-7.49276	6.74407e-14	5.41085e-12
WBGene00022751	ZK484.5	protein_coding	I	6087369		132.899	3.31489	0.309945	7.49292	6.73566e-14	5.41085e-12
WBGene00011176	R09E10.6	protein_coding	IV	10293008		276.633	2.94944	0.267126	7.41261	1.23841e-13	9.88625e-12
WBGene00006051	ssq-2	protein_coding	IV	4996142	Sperm-Specific family, class Q	182.865	3.22266	0.301303	7.40209	1.34053e-13	1.06482e-11
WBGene00011167	chil-23	protein_coding	II	9466905	CHItinase-Like	88.7482	2.42057	0.193974	7.39608	1.40262e-13	1.10862e-11
WBGene00007368	C06B8.2	protein_coding	V	15476064		304.291	2.22772	0.168517	7.38511	1.52327e-13	1.19806e-11
WBGene00013559	Y75B8A.28	protein_coding	III	12319108		882.486	1.89938	0.123593	7.35274	1.94183e-13	1.51977e-11
WBGene00016063	delm-2	protein_coding	I	4109407	DEgenerin Linked to Mechanosensation	41.404	3.96567	0.380273	7.33899	2.15206e-13	1.67609e-11
WBGene00019914	clec-150	protein_coding	III	1002707	C-type LECtin	2553.99	1.56176	0.0770614	7.33468	2.22245e-13	1.72251e-11
WBGene00020813	T25G12.6	protein_coding	X	17225235		183.197	2.16359	0.161316	7.29869	2.90582e-13	2.24127e-11
WBGene00006470	tag-120	protein_coding	V	9706603		2430.03	1.59455	0.0820855	7.29305	3.03006e-13	2.32586e-11
WBGene00021339	Y34F4.4	protein_coding	III	1023283		283.183	2.06769	0.148472	7.28291	3.26685e-13	2.49562e-11
WBGene00010128	F55G11.8	protein_coding	IV	12962808		525.477	1.95555	0.132908	7.26881	3.6267e-13	2.75733e-11
WBGene00004224	ptr-10	protein_coding	I	5662143	PaTched Related family	44.3507	-3.86594	0.370031	-7.24938	4.18696e-13	3.1682e-11
WBGene00016752	C48E7.7	protein_coding	I	6234719		172.195	3.34106	0.327983	7.24252	4.40428e-13	3.31692e-11
WBGene00004232	ptr-18	protein_coding	II	12965568	PaTched Related family	94.2631	-2.59275	0.220206	-7.23141	4.78022e-13	3.58314e-11
WBGene00003463	msp-76	protein_coding	IV	9688982	Major sperm protein 10/36/56/76	149.839	3.16099	0.300295	7.22725	4.92883e-13	3.67728e-11
WBGene00002827	let-653	protein_coding	IV	11885530	Let-653 protein; Uncharacterized protein	151.467	-2.15876	0.161251	-7.22011	5.19467e-13	3.83973e-11
WBGene00006056	sss-1	protein_coding	IV	9892739	Sperm-Specific family, class S	131.375	3.08794	0.289484	7.22029	5.1878e-13	3.83973e-11
WBGene00011856	T20D3.2	protein_coding	IV	9328739		8698.64	1.56149	0.0783231	7.21543	5.37626e-13	3.95564e-11
WBGene00014136	ZK896.5	protein_coding	IV	12876984		318.272	2.27814	0.179732	7.212	5.51359e-13	4.03807e-11
WBGene00000989	dhs-26	protein_coding	X	3360685	DeHydrogenases, Short chain	139.369	-4.34644	0.464137	-7.17196	7.39332e-13	5.39003e-11
WBGene00020846	T27A10.6	protein_coding	X	3588857		155.359	-2.39953	0.197043	-7.16617	7.71241e-13	5.59711e-11
WBGene00018984	F56F10.1	protein_coding	X	872517	Putative serine protease F56F10.1	2679.78	1.61003	0.0860616	7.13939	9.37448e-13	6.77253e-11
WBGene00001397	fat-5	protein_coding	V	17725002	Delta(9)-fatty-acid desaturase fat-5	2644.56	-2.26061	0.182367	-7.1372	9.52546e-13	6.83569e-11
WBGene00010673	K08E7.5	protein_coding	IV	12573370		34.3677	-4.20321	0.404395	-7.13626	9.59035e-13	6.83569e-11
WBGene00021354	fpn-1.1	protein_coding	I	2113655	FerroPortiN	1878.4	1.76983	0.108882	7.13639	9.58115e-13	6.83569e-11
WBGene00004773	sem-4	protein_coding	I	7038900	SEM-4 long form; Uncharacterized protein	438.126	-1.72345	0.10189	-7.13313	9.81106e-13	6.96193e-11
WBGene00017788	F25E5.7	protein_coding	V	7440107		50.1258	-3.30749	0.314532	-7.10243	1.22587e-12	8.66025e-11
WBGene00000611	col-34	protein_coding	IV	4243548	Cuticle collagen 34	217.641	-2.20743	0.171771	-7.09347	1.30786e-12	9.1585e-11
WBGene00015280	C01B10.6	protein_coding	IV	6640161		4338.84	1.69144	0.0982863	7.09363	1.30636e-12	9.1585e-11
WBGene00010050	F54D5.4	protein_coding	II	11569818		4307.42	1.73424	0.104534	7.08573	1.38316e-12	9.64347e-11
WBGene00008495	F01D5.5	protein_coding	II	14001686		135.599	2.78899	0.256229	7.06818	1.56974e-12	1.08967e-10
WBGene00006038	ssp-9	protein_coding	IV	4994325	Sperm-specific class P protein 9/11	118.81	3.66399	0.367807	7.06527	1.60299e-12	1.10794e-10
WBGene00016274	C30G12.2	protein_coding	II	7290373		1203.26	-2.07231	0.153724	-7.05635	1.70939e-12	1.17639e-10
WBGene00020080	math-37	protein_coding	II	2117059	MATH (meprin-associated Traf homology) domain containing	149.26	2.64234	0.236156	7.04974	1.79257e-12	1.22833e-10
WBGene00003171	mec-7	protein_coding	X	7774856	Tubulin beta-1 chain	877.033	-1.6544	0.0933566	-7.04483	1.85694e-12	1.267e-10
WBGene00008486	ugt-44	protein_coding	IV	10469763	UDP-GlucuronosylTransferase	4234.29	1.93452	0.134674	7.02018	2.21582e-12	1.50544e-10
WBGene00003097	lys-8	protein_coding	II	5586165	LYSozyme	5361.15	1.57865	0.0833931	6.98814	2.78545e-12	1.88443e-10
WBGene00010692	K08H2.5	protein_coding	X	13241109		91.254	3.04918	0.296593	6.97124	3.14167e-12	2.11645e-10
WBGene00019746	M03A1.3	protein_coding	II	4557787		5894.64	1.84933	0.1242	6.95326	3.56937e-12	2.39448e-10
WBGene00013852	hhat-1	protein_coding	II	14678468	Homolog of Hedgehog AcylTransferase	47.5175	-3.52817	0.350831	-6.95153	3.61337e-12	2.41385e-10
WBGene00023492	T24D3.2	protein_coding	X	12425801		139.849	2.38477	0.202385	6.94602	3.75728e-12	2.49953e-10
WBGene00003464	msp-77	protein_coding	IV	9894596	Major sperm protein 77/79	124.726	3.20439	0.31665	6.9136	4.72499e-12	3.13026e-10
WBGene00003470	msp-152	protein_coding	II	4932993	Major sperm protein 152	79.8298	3.45777	0.350288	6.90702	4.94952e-12	3.26546e-10
WBGene00017308	F09F9.3	protein_coding	X	4119526		92.5376	3.53812	0.353978	6.88569	5.75064e-12	3.77839e-10
WBGene00000743	col-170	protein_coding	X	6331620	COLlagen	37.6789	-4.01797	0.407041	-6.86551	6.62543e-12	4.33531e-10
WBGene00008741	F13D12.6	protein_coding	II	11739456	Uncharacterized serine carboxypeptidase F13S12.6	4738.93	1.66176	0.0974264	6.85084	7.34173e-12	4.78441e-10
WBGene00009681	gipc-2	protein_coding	IV	10026411	GIPC (RGS-GAIP Interacting Protein C) homolog	232.358	2.60718	0.2395	6.84516	7.63907e-12	4.95794e-10
WBGene00001059	dpf-6	protein_coding	III	8038241	Dipeptidyl peptidase family member 6	347.634	-2.32968	0.198377	-6.8316	8.39744e-12	5.42808e-10
WBGene00014106	ZK856.5	protein_coding	V	10186007		365.883	1.84218	0.124819	6.81873	9.18514e-12	5.9133e-10
WBGene00000399	cdh-7	protein_coding	II	14843218	CaDHerin family	42.9201	-4.29246	0.428583	-6.81124	9.67628e-12	6.20448e-10
WBGene00016440	gipc-1	protein_coding	III	4870778	GIPC (RGS-GAIP Interacting Protein C) homolog	170.489	2.88801	0.282144	6.80902	9.82651e-12	6.2756e-10
WBGene00017499	pud-1.1	protein_coding	V	2330429	Protein Up-regulated in Daf-2(gf)	3146.54	-3.76527	0.425117	-6.80613	1.00258e-11	6.37739e-10
WBGene00008963	F19H8.2	protein_coding	II	14604145		144.449	-2.1441	0.16938	-6.78745	1.14134e-11	7.23121e-10
WBGene00000712	col-139	protein_coding	V	4652382	COLlagen	975.024	3.29772	0.351406	6.77447	1.24866e-11	7.87987e-10
WBGene00009684	msd-3	protein_coding	IV	10035638	Major Sperm protein Domain containing	98.2272	3.07309	0.308457	6.7704	1.28424e-11	8.07252e-10
WBGene00008831	F14H3.12	protein_coding	V	16074113		227.249	1.98273	0.147027	6.7676	1.30937e-11	8.19822e-10
WBGene00000703	col-129	protein_coding	IV	12108671	COLlagen	1127.14	3.43076	0.373478	6.74975	1.48104e-11	9.23685e-10
WBGene00008698	F11D11.3	protein_coding	V	18757916		118.04	3.4629	0.364227	6.73816	1.60399e-11	9.96474e-10
WBGene00019213	H20E11.1	protein_coding	IV	6830227		1211.96	1.7634	0.114793	6.72208	1.79144e-11	1.10861e-09
WBGene00020554	T19A5.3	protein_coding	V	8939591		72.7098	-3.2381	0.331258	-6.71503	1.88021e-11	1.15905e-09
WBGene00012323	oac-54	protein_coding	II	9158108	O-ACyltransferase homolog	275.611	2.04245	0.157919	6.70288	2.04349e-11	1.25486e-09
WBGene00010684	K08F9.1	protein_coding	V	15137273		97.6902	2.56644	0.239137	6.6687	2.58088e-11	1.57879e-09
WBGene00005616	srj-29	protein_coding	V	16075659	Serpentine Receptor, class J	46.6718	3.50268	0.366904	6.65887	2.75935e-11	1.68152e-09
WBGene00020325	bath-46	protein_coding	II	1598029	BTB and MATH domain containing	100.566	2.66908	0.254501	6.6483	2.96506e-11	1.80001e-09
WBGene00016351	C33F10.1	protein_coding	II	4835029		116.007	3.01698	0.30521	6.63889	3.16059e-11	1.91144e-09
WBGene00002274	lec-11	protein_coding	IV	6588190	Galectin	2588.32	1.59498	0.0904828	6.63334	3.28165e-11	1.97716e-09
WBGene00010041	F54C9.3	protein_coding	II	8566520		2717.25	1.73577	0.112281	6.62021	3.58693e-11	2.15297e-09
WBGene00000641	col-65	protein_coding	I	11489158	COLlagen	33.8343	-4.23961	0.43488	-6.61889	3.61894e-11	2.16405e-09
WBGene00011107	R07E3.6	protein_coding	X	10317722		78.9434	-2.74746	0.265634	-6.58206	4.63974e-11	2.76411e-09
WBGene00014132	ZK896.1	protein_coding	IV	12872829		241.666	2.17817	0.182222	6.57047	5.01552e-11	2.97687e-09
WBGene00044617	bus-1	protein_coding	V	9022319		38.3318	-3.47303	0.359559	-6.56304	5.2722e-11	3.11763e-09
WBGene00012782	Y43C5A.2	protein_coding	IV	10269883		2427.28	1.50132	0.0770146	6.55531	5.55251e-11	3.27127e-09
WBGene00019931	R07C12.1	protein_coding	IV	4152547		35.5142	3.40337	0.3593	6.54674	5.88068e-11	3.45187e-09
WBGene00022754	nspd-1	protein_coding	I	6097496	Nematode Specific Peptide family, group D	82.0988	3.147	0.32648	6.52214	6.93109e-11	4.05354e-09
WBGene00006956	wrt-10	protein_coding	II	7533300	WaRThog (hedgehog-like family)	180.299	-3.64229	0.410306	-6.52047	7.00875e-11	4.08401e-09
WBGene00010473	hrg-2	protein_coding	V	12409369	Heme Responsive Gene	677.804	2.12785	0.176382	6.50851	7.5898e-11	4.4065e-09
WBGene00044074	mltn-5	protein_coding	II	13925268	MLt-TeN (mlt-10) related	30.1129	-4.73283	0.474449	-6.50352	7.84637e-11	4.53896e-09
WBGene00235133	T26H5.14	protein_coding	V	15449165		77.2782	3.50094	0.366192	6.49304	8.41186e-11	4.84851e-09
WBGene00021590	Y46D2A.2	protein_coding	II	3321060		1316.77	1.55166	0.0864372	6.43517	1.23335e-10	7.08331e-09
WBGene00009957	F53B2.8	protein_coding	IV	12526247		3635.63	1.59612	0.0935445	6.4307	1.27021e-10	7.26889e-09
WBGene00219216	K08D10.14	protein_coding	IV	4155273		68.1483	2.51982	0.240243	6.41805	1.38028e-10	7.87056e-09
WBGene00014252	ZK1320.2	protein_coding	II	9657876		3177.61	1.54957	0.086369	6.41405	1.41699e-10	8.05113e-09
WBGene00000657	col-81	protein_coding	II	11012395	COLlagen	611.486	3.43149	0.395772	6.41032	1.4521e-10	8.22137e-09
WBGene00012947	Y47H9C.1	protein_coding	I	11830985		142.197	3.70151	0.438907	6.37916	1.78064e-10	1.00458e-08
WBGene00018910	F56A4.2	protein_coding	V	2459637	C-type LECtin	74198.7	1.73473	0.116668	6.36764	1.91956e-10	1.07915e-08
WBGene00014135	ZK896.4	protein_coding	IV	12880667		496.546	1.70095	0.11144	6.35793	2.04493e-10	1.14559e-08
WBGene00001188	egl-20	protein_coding	IV	9812444	Uncharacterized protein; Wnt homolog	379.8	-1.67	0.106032	-6.345	2.22421e-10	1.24167e-08
WBGene00016281	C31B8.4	protein_coding	V	2896637		66.01	3.473	0.37892	6.34442	2.23269e-10	1.24206e-08
WBGene00000212	asm-2	protein_coding	X	11321077	Sphingomyelin phosphodiesterase 2	340.791	1.73955	0.11787	6.34368	2.24338e-10	1.24367e-08
WBGene00013173	Y53F4B.27	protein_coding	II	15145948		28.2405	-4.08449	0.429746	-6.33679	2.34608e-10	1.29611e-08
WBGene00012253	clec-50	protein_coding	V	19752401	C-type LECtin	7684.12	1.50757	0.08073	6.33488	2.37528e-10	1.30771e-08
WBGene00017751	F23F12.3	protein_coding	III	6500543		113.663	2.13748	0.181935	6.33406	2.38795e-10	1.31017e-08
WBGene00018874	tag-234	protein_coding	II	5864195		1239.62	1.61228	0.0976271	6.33135	2.43028e-10	1.32883e-08
WBGene00015599	fbxa-164	protein_coding	II	1612788	F-box A protein	45.1198	3.52979	0.389122	6.32395	2.54966e-10	1.38935e-08
WBGene00007308	C04G2.9	protein_coding	IV	10112891		151.595	2.81325	0.294351	6.30503	2.88135e-10	1.56475e-08
WBGene00011166	chil-22	protein_coding	II	9464474	CHItinase-Like	218.224	2.12299	0.181433	6.29742	3.02641e-10	1.63795e-08
WBGene00044284	spp-21	protein_coding	X	11490130	SaPosin-like Protein family	37.1978	5.25842	0.509913	6.28543	3.26938e-10	1.76348e-08
WBGene00015339	C02E7.6	protein_coding	V	4919207		28.3992	-4.08106	0.439465	-6.26758	3.66695e-10	1.97126e-08
WBGene00015688	C10G11.8	protein_coding	I	6271981		134.224	2.89167	0.310412	6.19901	5.6818e-10	3.04415e-08
WBGene00017421	cutl-29	protein_coding	X	8262423	CUTiclin-Like	46.484	-2.85738	0.295225	-6.19026	6.00649e-10	3.20735e-08
WBGene00018997	F57B9.3	protein_coding	III	6939888		215.091	2.81473	0.296447	6.18648	6.15209e-10	3.27414e-08
WBGene00021540	Y42H9AR.5	protein_coding	IV	8102516		87.0281	2.52055	0.250268	6.17995	6.41226e-10	3.40127e-08
WBGene00022891	ZK1290.10	protein_coding	II	7551943		167.199	2.6003	0.264856	6.16801	6.91556e-10	3.65609e-08
WBGene00023483	Y75B8A.39	protein_coding	III	12313287		117.305	3.11664	0.34088	6.16346	7.11718e-10	3.75026e-08
WBGene00003681	nhr-91	protein_coding	X	15309374	Nuclear hormone receptor family member nhr-91	105.373	-2.28017	0.210989	-6.10721	1.01387e-09	5.3248e-08
WBGene00015795	C15F1.2	protein_coding	II	6979951		59.5291	-2.80014	0.293957	-6.09893	1.06781e-09	5.58973e-08
WBGene00017417	F13B6.2	protein_coding	IV	7458918		635.545	1.7971	0.132448	6.0969	1.08142e-09	5.64249e-08
WBGene00019430	K06A5.2	protein_coding	I	6468129		126.07	2.72675	0.287942	6.09513	1.09351e-09	5.68696e-08
WBGene00020561	T19C3.3	protein_coding	III	610878		76.5191	-2.41103	0.23253	-6.07665	1.22718e-09	6.36144e-08
WBGene00017592	F19C7.2	protein_coding	IV	4599954		596.558	1.80699	0.13477	6.06829	1.29281e-09	6.65838e-08
WBGene00018737	F53B1.4	protein_coding	X	2111778		47.3222	-3.13231	0.345895	-6.06841	1.29181e-09	6.65838e-08
WBGene00194703	F26B1.8	protein_coding	I	6329536		99.7686	3.00025	0.331464	6.06248	1.34039e-09	6.88127e-08
WBGene00016447	msd-4	protein_coding	III	4868334	Major Sperm protein Domain containing	112.623	3.01225	0.34015	6.06074	1.35494e-09	6.93365e-08
WBGene00018468	tag-80	protein_coding	IV	7588931	LOW QUALITY PROTEIN: Uncharacterized protein CELE_F45E4.3	221.058	-1.84713	0.140768	-6.05098	1.43968e-09	7.34377e-08
WBGene00020990	W03D8.9	protein_coding	I	2784617		84.6462	3.44832	0.390414	6.04022	1.53904e-09	7.82559e-08
WBGene00000220	atf-2	protein_coding	II	8751986	ATF (cAMP-dependent transcription factor) family	58.3009	-2.6471	0.272316	-6.02848	1.65514e-09	8.38918e-08
WBGene00000599	col-10	protein_coding	V	9164295	Cuticle collagen 10	993.573	-1.7862	0.13188	-6.02585	1.68219e-09	8.49933e-08
WBGene00019058	F58F9.4	protein_coding	IV	6231044		121.216	2.05117	0.177439	6.01679	1.77915e-09	8.96085e-08
WBGene00003091	lys-2	protein_coding	V	10280310	LYSozyme	14239	1.49635	0.0835698	5.9894	2.10623e-09	1.05748e-07
WBGene00000528	clh-1	protein_coding	II	11846508	Chloride channel protein	1659.76	1.54063	0.0911466	5.98658	2.14295e-09	1.07255e-07
WBGene00004796	sid-2	protein_coding	III	13679445	Systemic RNA interference defective protein 2	657.992	1.58764	0.0995239	5.96529	2.44207e-09	1.21844e-07
WBGene00009914	F49H6.13	protein_coding	V	17008673		75.7315	3.73175	0.410623	5.96286	2.47859e-09	1.23281e-07
WBGene00235306	W03D2.13	protein_coding	IV	4056520		215.983	1.93559	0.159664	5.95073	2.66948e-09	1.32363e-07
WBGene00020083	R57.2	protein_coding	X	297248		32.2305	-3.45563	0.392686	-5.92875	3.05242e-09	1.50882e-07
WBGene00022517	ZC123.1	protein_coding	I	837996		45.2331	-3.03572	0.339675	-5.91626	3.29339e-09	1.62291e-07
WBGene00015841	skpo-2	protein_coding	II	3431286	ShK domain and PerOxidase domain containing protein	29.3255	-3.64092	0.414223	-5.90471	3.5327e-09	1.73548e-07
WBGene00016013	C23G10.6	protein_coding	III	6192121	UDP-glucuronosyltransferase	1181.73	-3.00759	0.360058	-5.89188	3.81828e-09	1.87002e-07
WBGene00003467	msp-81	protein_coding	IV	9835997	Major sperm protein 19/31/40/45/50/51/53/59/61/65/81/113/142	118.177	2.75051	0.305696	5.86185	4.57727e-09	2.23488e-07
WBGene00006429	arrd-3	protein_coding	II	9412480	ARRestin Domain protein	30.3698	3.19159	0.36958	5.84379	5.10263e-09	2.4838e-07
WBGene00003435	msp-40	protein_coding	II	4825380	Major sperm protein 19/31/40/45/50/51/53/59/61/65/81/113/142	138.078	2.81207	0.316222	5.83783	5.28851e-09	2.56645e-07
WBGene00013037	Y49E10.18	protein_coding	III	12442636		789.62	1.86726	0.151096	5.82671	5.65301e-09	2.73503e-07
WBGene00016912	clec-86	protein_coding	X	7139901	C-type LECtin	65.6825	2.6142	0.283737	5.82056	5.86505e-09	2.82904e-07
WBGene00011517	cgt-1	protein_coding	V	15886724	Ceramide glucosyltransferase 1	356.853	1.81432	0.143185	5.78042	7.45137e-09	3.58339e-07
WBGene00003451	msp-58	protein_coding	IV	5308593	Major Sperm Protein	146.116	2.59106	0.282961	5.77955	7.48988e-09	3.5911e-07
WBGene00021379	Y37E11B.7	protein_coding	IV	3599523		119.167	2.20167	0.212991	5.75223	8.80746e-09	4.21017e-07
WBGene00002243	lad-2	protein_coding	IV	2964407	L1 CAM ADhesion molecule homolog	96.8424	-2.11931	0.195557	-5.74779	9.04174e-09	4.30927e-07
WBGene00016717	math-22	protein_coding	II	1905429	MATH (meprin-associated Traf homology) domain containing	482.467	1.84691	0.149879	5.74089	9.41812e-09	4.47529e-07
WBGene00009653	F43D9.1	protein_coding	III	10488128		57.6791	-2.68199	0.293937	-5.72988	1.00504e-08	4.76154e-07
WBGene00018297	F41F3.3	protein_coding	V	4647661		290.304	-3.54571	0.453459	-5.71219	1.11533e-08	5.26843e-07
WBGene00004144	pqn-60	protein_coding	V	504039	Prion-like-(Q/N-rich)-domain-bearing protein	72.0292	2.87372	0.332957	5.69039	1.26748e-08	5.95192e-07
WBGene00021415	nsy-4	protein_coding	IV	2324058	Neuronal SYmmetry	113.588	-2.01299	0.179283	-5.69073	1.26497e-08	5.95192e-07
WBGene00015913	C17F4.7	protein_coding	II	3245087		46950.3	1.3932	0.0696208	5.68905	1.2775e-08	5.9814e-07
WBGene00010633	nspd-2	protein_coding	IV	9844029	Nematode Specific Peptide family, group D	92.9826	2.87723	0.339075	5.67896	1.35516e-08	6.32648e-07
WBGene00021517	Y41D4B.15	protein_coding	IV	1564081		114.388	3.03194	0.354702	5.67835	1.35998e-08	6.33045e-07
WBGene00015537	C06E4.8	protein_coding	IV	7284219		94.4123	2.42229	0.257239	5.6671	1.45235e-08	6.74076e-07
WBGene00018645	F49F1.5	protein_coding	IV	4119461		36.2348	3.62623	0.431276	5.66179	1.49804e-08	6.93267e-07
WBGene00015756	C14C6.2	protein_coding	V	563135		352.905	1.98335	0.177131	5.65957	1.5175e-08	7.00242e-07
WBGene00010742	K10D6.2	protein_coding	V	11193735		263.969	-1.65897	0.117523	-5.64622	1.64018e-08	7.54672e-07
WBGene00014158	ZK938.1	protein_coding	II	9829418	Serine/threonine-protein phosphatase	110.982	2.86148	0.338429	5.63232	1.77805e-08	8.15757e-07
WBGene00000741	col-168	protein_coding	X	6326191	COLlagen	84.3013	-2.51608	0.269602	-5.63109	1.79079e-08	8.1925e-07
WBGene00009796	F46G10.1	protein_coding	X	13310050		2204.28	1.56937	0.102421	5.6202	1.90735e-08	8.67601e-07
WBGene00017068	D2092.8	protein_coding	I	6620665		23.3639	-4.16487	0.478686	-5.62037	1.90549e-08	8.67601e-07
WBGene00021253	Y22D7AL.15	protein_coding	III	1658248		1476.71	1.58978	0.106255	5.61619	1.95209e-08	8.85429e-07
WBGene00003468	msp-113	protein_coding	IV	5297927	Major sperm protein 19/31/40/45/50/51/53/59/61/65/81/113/142	62.4964	3.37865	0.401266	5.60684	2.06055e-08	9.31974e-07
WBGene00017307	F09F9.2	protein_coding	X	4110433		35.8377	-2.95127	0.338725	-5.58672	2.314e-08	1.04365e-06
WBGene00001399	fat-7	protein_coding	V	7151356	Delta(9)-fatty-acid desaturase fat-7	3156.16	-2.26141	0.242916	-5.58603	2.32325e-08	1.04425e-06
WBGene00011548	T06G6.6	protein_coding	I	12718309		21.1014	-4.20166	0.480836	-5.58564	2.3284e-08	1.04425e-06
WBGene00003466	msp-79	protein_coding	IV	9766745	Major sperm protein 77/79	86.2894	3.25517	0.411729	5.57742	2.44115e-08	1.09152e-06
WBGene00022415	Y102A11A.5	protein_coding	X	2030959		64.1349	-2.63921	0.294084	-5.57697	2.44748e-08	1.09152e-06
WBGene00021398	Y38C1AA.7	protein_coding	IV	158967		110.398	2.79104	0.329146	5.55564	2.76591e-08	1.2301e-06
WBGene00019957	R08E3.1	protein_coding	X	4825003		4305.59	1.42901	0.0779147	5.55264	2.81385e-08	1.24794e-06
WBGene00004172	pqn-92	protein_coding	III	12307781	Prion-like-(Q/N-rich)-domain-bearing protein	788.216	1.43407	0.0791993	5.52902	3.22016e-08	1.42419e-06
WBGene00010835	M03B6.3	protein_coding	X	13860761		82.7928	-2.15454	0.210042	-5.52714	3.25496e-08	1.4356e-06
WBGene00011836	mam-4	protein_coding	V	11248146	MAM (Meprin, A5-protein, PTPmu) domain protein	31.8305	-3.38731	0.412217	-5.49807	3.83964e-08	1.68881e-06
WBGene00194717	ZC239.22	protein_coding	II	3219687		224.008	2.06758	0.199433	5.4925	3.96285e-08	1.73821e-06
WBGene00020033	R12E2.7	protein_coding	I	4153957		32.8217	-3.1659	0.381032	-5.48502	4.13426e-08	1.80843e-06
WBGene00004127	abu-12	protein_coding	X	450445	Activated in Blocked Unfolded protein response	27.5764	-3.38891	0.412453	-5.48114	4.22582e-08	1.84343e-06
WBGene00017018	D1014.5	protein_coding	V	8123684		30.4776	-3.49396	0.432618	-5.46397	4.65607e-08	2.02558e-06
WBGene00019212	H19M22.3	protein_coding	III	2636405		49.6166	-2.5218	0.279013	-5.4567	4.85072e-08	2.10453e-06
WBGene00077593	C49G7.12	protein_coding	V	4038821		330.011	2.04588	0.197818	5.42762	5.71118e-08	2.47113e-06
WBGene00002259	lbp-7	protein_coding	V	13879550	Fatty acid-binding protein homolog 7	1215.23	1.6843	0.12821	5.41565	6.10675e-08	2.63515e-06
WBGene00000742	col-169	protein_coding	X	6329160	COLlagen	46.3977	-2.88862	0.346168	-5.40586	6.4497e-08	2.77563e-06
WBGene00013654	Y105C5B.15	protein_coding	IV	15951909	Purple acid phosphatase	2174.73	1.39955	0.0745172	5.40515	6.47539e-08	2.7792e-06
WBGene00011214	R10E9.2	protein_coding	III	3962728		96.2196	2.5942	0.304597	5.38711	7.15977e-08	3.05916e-06
WBGene00017716	F22F4.1	protein_coding	X	6004483		42.8667	-2.65931	0.305303	-5.38696	7.16602e-08	3.05916e-06
WBGene00017703	F22E5.1	protein_coding	II	2675788		225.136	2.35514	0.258852	5.38195	7.36848e-08	3.1372e-06
WBGene00003425	msp-10	protein_coding	IV	9837632	Major sperm protein 10/36/56/76	64.6676	3.70045	0.4653	5.37252	7.76424e-08	3.28817e-06
WBGene00017535	atf-8	protein_coding	V	6105675	ATF (cAMP-dependent transcription factor) family	24.3953	-3.45716	0.425731	-5.373	7.74372e-08	3.28817e-06
WBGene00007916	C34C6.3	protein_coding	II	8691922		58.9003	-2.50619	0.282573	-5.36351	8.16185e-08	3.44741e-06
WBGene00003465	msp-78	protein_coding	IV	9770030	Major sperm protein 78	126.488	2.60245	0.310494	5.33904	9.34385e-08	3.93625e-06
WBGene00005188	srg-31	protein_coding	V	6950835	Serpentine receptor class gamma-31	76.19	2.74942	0.333577	5.33538	9.53454e-08	4.00601e-06
WBGene00007857	C31H5.6	protein_coding	I	9043319		623.991	1.55941	0.106247	5.32656	1.00088e-07	4.19424e-06
WBGene00000746	col-173	protein_coding	X	6875167	COLlagen	27.2633	-3.20261	0.392314	-5.32408	1.01463e-07	4.24074e-06
WBGene00007694	C23H4.6	protein_coding	X	12235621		462.418	1.71836	0.137836	5.30671	1.11622e-07	4.65314e-06
WBGene00001556	gcy-36	protein_coding	X	15479017	Soluble guanylate cyclase gcy-36	27.9848	-3.2057	0.398893	-5.29012	1.22235e-07	5.08231e-06
WBGene00043062	clec-80	protein_coding	IV	2823746	C-type LECtin	530.188	1.71009	0.136653	5.27995	1.29221e-07	5.3588e-06
WBGene00000707	col-133	protein_coding	IV	14098335	COLlagen	30.2322	2.79281	0.343133	5.27883	1.30014e-07	5.37773e-06
WBGene00007190	rmd-3	protein_coding	II	11338450	Regulator of Microtubule Dynamics	58.5125	2.95694	0.36993	5.27806	1.30561e-07	5.38641e-06
WBGene00003443	msp-50	protein_coding	II	5199763	Major sperm protein 19/31/40/45/50/51/53/59/61/65/81/113/142	57.6341	2.8347	0.352932	5.27397	1.33502e-07	5.49354e-06
WBGene00018314	F41H10.1	protein_coding	IV	5382909		72.7824	2.39293	0.271292	5.2696	1.36719e-07	5.61145e-06
WBGene00077673	B0563.10	protein_coding	X	9166748		13.4025	4.2953	0.554214	5.25684	1.46555e-07	5.99975e-06
WBGene00010998	R03G8.3	protein_coding	X	13091131		331.84	1.69708	0.134901	5.25245	1.50087e-07	6.12861e-06
WBGene00003442	msp-49	protein_coding	II	5194332	Major sperm protein 49	42.9849	2.92433	0.370723	5.24708	1.54533e-07	6.29405e-06
WBGene00000702	col-128	protein_coding	IV	11550001	COLlagen	25.4901	-3.25616	0.408433	-5.23886	1.61571e-07	6.56398e-06
WBGene00010769	asah-1	protein_coding	I	12505098	Acid ceramidase	1760.63	1.5634	0.109033	5.23115	1.6846e-07	6.82647e-06
WBGene00022591	cuti-1	protein_coding	I	6404587	CUTicle and epithelial Integrity	59.9862	-2.40836	0.271064	-5.2232	1.75857e-07	7.1082e-06
WBGene00003452	msp-59	protein_coding	IV	5312690	Major sperm protein 19/31/40/45/50/51/53/59/61/65/81/113/142	214.761	3.37312	0.531269	5.21144	1.87381e-07	7.55484e-06
WBGene00015932	C17H12.6	protein_coding	IV	6821066		880.215	1.79991	0.157835	5.18455	2.16536e-07	8.70833e-06
WBGene00017418	F13B6.3	protein_coding	IV	7461964		658.223	-1.44013	0.0854122	-5.17662	2.25945e-07	9.06392e-06
WBGene00018232	F40E3.5	protein_coding	I	2645266		54.3172	2.45797	0.288271	5.17271	2.30723e-07	9.2324e-06
WBGene00012959	Y47H10A.3	protein_coding	I	12088120		88.6472	2.90484	0.374301	5.14041	2.74143e-07	1.09424e-05
WBGene00015259	dod-20	protein_coding	V	422498	Downstream Of DAF-16 (regulated by DAF-16)	93.4131	2.83614	0.36133	5.13465	2.82671e-07	1.12547e-05
WBGene00008577	F08G2.5	protein_coding	II	13832853		1047.55	1.62198	0.123318	5.13028	2.89308e-07	1.14903e-05
WBGene00009396	clec-65	protein_coding	II	12901294	C-type LECtin	4822.7	1.44302	0.0872565	5.12894	2.91385e-07	1.1544e-05
WBGene00011838	T19C4.1	protein_coding	V	11149707		54.6955	-2.28976	0.250867	-5.12817	2.92571e-07	1.15623e-05
WBGene00013608	clec-35	protein_coding	V	16852291	C-type LECtin	16.3047	3.51762	0.461871	5.11044	3.21402e-07	1.26704e-05
WBGene00003431	msp-33	protein_coding	II	4892269	Major sperm protein 33	104.156	2.44882	0.293224	5.10159	3.3682e-07	1.32455e-05
WBGene00050875	bah-1	protein_coding	I	11465142	Biofilm Absent on Head (after Yersinia exposure)	20.0158	-4.69212	0.540924	-5.09825	3.42807e-07	1.34478e-05
WBGene00008632	fbxa-88	protein_coding	V	16142008	F-box A protein	83.9957	2.10766	0.222861	5.09448	3.49697e-07	1.36845e-05
WBGene00000282	cah-4	protein_coding	X	13542574	Carbonic AnHydrase	6333.7	1.50063	0.0996339	5.08464	3.6833e-07	1.43784e-05
WBGene00001898	his-24	protein_coding	X	14490107	Histone H1.1	287.102	-1.73279	0.145933	-5.07704	3.83364e-07	1.49287e-05
WBGene00016862	C52A10.1	protein_coding	V	5230477	Carboxylic ester hydrolase	1212.35	1.3675	0.0733263	5.05756	4.24649e-07	1.64962e-05
WBGene00010125	dod-22	protein_coding	IV	12965387	Downstream Of DAF-16 (regulated by DAF-16)	276.592	1.79246	0.160798	5.03777	4.70999e-07	1.82523e-05
WBGene00000638	col-62	protein_coding	I	7403341	COLlagen	37.9394	3.00842	0.411957	5.03557	4.76426e-07	1.84179e-05
WBGene00015739	ugt-7	protein_coding	V	4997023	UDP-GlucuronosylTransferase	183.079	1.81116	0.164396	5.0313	4.87164e-07	1.87876e-05
WBGene00001557	gcy-37	protein_coding	IV	2150650	Soluble guanylate cyclase gcy-37	25.9979	-3.06757	0.395239	-5.028	4.95635e-07	1.90682e-05
WBGene00009215	thn-2	protein_coding	IV	12383168	THaumatiN family	794.891	1.58923	0.11908	5.01887	5.19777e-07	1.99489e-05
WBGene00001079	dpy-20	protein_coding	IV	11696781		18.5661	-3.83241	0.48857	-5.0168	5.25402e-07	2.01165e-05
WBGene00019057	F58F9.3	protein_coding	IV	6233253		409.849	1.62373	0.12622	5.01609	5.27334e-07	2.01421e-05
WBGene00008851	F15B9.8	protein_coding	V	12988532		48.5688	-2.97594	0.394393	-5.0155	5.28951e-07	2.01557e-05
WBGene00014169	ZK945.7	protein_coding	II	10107474		45.4317	3.29567	0.433425	4.9931	5.94171e-07	2.2587e-05
WBGene00021772	math-45	protein_coding	II	1510287	MATH (meprin-associated Traf homology) domain containing	311.149	1.73243	0.149392	4.98721	6.12574e-07	2.32313e-05
WBGene00016658	C45B2.1	protein_coding	X	6086124		518.351	1.87558	0.179752	4.98088	6.32955e-07	2.39473e-05
WBGene00006464	bath-47	protein_coding	II	1601789	BTB and MATH domain-containing protein 47	230.623	1.78859	0.162151	4.96478	6.87779e-07	2.596e-05
WBGene00020350	T08B2.12	protein_coding	I	6231498		88.3033	3.4693	0.546532	4.96277	6.9496e-07	2.61692e-05
WBGene00005548	sri-36	protein_coding	II	2583782	Serpentine Receptor, class I	62.6194	4.08194	0.448236	4.95435	7.25737e-07	2.72638e-05
WBGene00012939	Y47D3B.1	protein_coding	III	11382281		22.6063	-3.18899	0.417828	-4.95107	7.38063e-07	2.76618e-05
WBGene00012032	T26C5.2	protein_coding	II	9233223		44.1364	-2.60673	0.325457	-4.9335	8.07673e-07	3.01998e-05
WBGene00002257	lbp-5	protein_coding	I	6731269	Fatty acid-binding protein homolog 5	1288.51	1.58341	0.120007	4.93259	8.11475e-07	3.02711e-05
WBGene00017386	nspd-5	protein_coding	II	4860063	Nematode Specific Peptide family, group D	54.0474	3.00755	0.416298	4.92185	8.57316e-07	3.19066e-05
WBGene00022033	Y65B4BL.1	protein_coding	I	530969		86.9554	-3.39369	0.508682	-4.92085	8.61691e-07	3.19948e-05
WBGene00255375	F08B4.8	protein_coding	IV	8677603		82.9537	2.70695	0.364975	4.88441	1.03738e-06	3.84287e-05
WBGene00003434	msp-38	protein_coding	IV	10143312	Major sperm protein 38	67.4064	2.83836	0.380246	4.88187	1.05083e-06	3.88368e-05
WBGene00002269	lec-6	protein_coding	III	599509	Galectin	18003.4	1.53181	0.11107	4.85449	1.20694e-06	4.45035e-05
WBGene00044381	K10G6.5	protein_coding	II	3987538		34.8671	2.74164	0.369113	4.83608	1.32425e-06	4.87164e-05
WBGene00016133	C26B9.3	protein_coding	X	5338273		56.6722	-2.21584	0.253903	-4.83048	1.36206e-06	4.99921e-05
WBGene00010124	F55G11.4	protein_coding	IV	12973636		2671.09	1.50522	0.106118	4.82562	1.3957e-06	5.11095e-05
WBGene00007264	C02F4.4	protein_coding	IV	10513890		20.9772	-3.38337	0.458737	-4.81021	1.50772e-06	5.50854e-05
WBGene00009432	cld-9	protein_coding	V	13749185	Cub (CUB) Like Domain containing protein	1322.01	1.60707	0.128521	4.80439	1.55223e-06	5.6582e-05
WBGene00007301	C04F12.7	protein_coding	I	9695708		151.392	2.94769	0.440525	4.7947	1.62914e-06	5.92504e-05
WBGene00044787	C54D10.12	protein_coding	V	12434361		24.7192	3.37329	0.459031	4.7832	1.72527e-06	6.26037e-05
WBGene00015079	B0244.4	protein_coding	III	5747485	Putative G-protein coupled receptor B0244.4	32.3307	2.79479	0.381098	4.7595	1.94073e-06	7.01035e-05
WBGene00017438	F13H8.5	protein_coding	II	6252774		30.5582	-2.79413	0.370918	-4.75961	1.93971e-06	7.01035e-05
WBGene00020414	T10E9.4	protein_coding	I	6525049		115.381	2.53416	0.336809	4.75565	1.97812e-06	7.12928e-05
WBGene00003653	nhr-63	protein_coding	V	16002595	Nuclear Hormone Receptor family	224.879	1.72155	0.154924	4.75494	1.98503e-06	7.13807e-05
WBGene00008633	fbxa-18	protein_coding	V	16143573	F-box A protein	29.9085	2.72557	0.370804	4.75163	2.01781e-06	7.23964e-05
WBGene00003448	msp-55	protein_coding	IV	5055593	Major sperm protein 55/57	71.7689	2.54237	0.336277	4.74934	2.04082e-06	7.30575e-05
WBGene00008762	ztf-2	protein_coding	I	7291272	Zinc finger putative Transcription Factor family	51.2906	-2.3483	0.288735	-4.72713	2.27718e-06	8.13366e-05
WBGene00044783	T26H5.10	protein_coding	V	15443332		43.0214	3.27614	0.509323	4.72127	2.34378e-06	8.35285e-05
WBGene00018643	drd-50	protein_coding	IV	4117788	dietary restriction down regulated	151.442	2.30026	0.286469	4.71836	2.37749e-06	8.45411e-05
WBGene00018971	clec-67	protein_coding	IV	3922165	C-type LECtin	2116.03	1.75415	0.163657	4.71082	2.4672e-06	8.75364e-05
WBGene00016017	C23G10.11	protein_coding	III	6215165		29.4344	2.76914	0.384594	4.70679	2.51648e-06	8.90867e-05
WBGene00002393	lpr-1	protein_coding	I	557431	LiPocalin-Related protein	70.8379	-2.10924	0.240107	-4.70423	2.54824e-06	9.00114e-05
WBGene00019318	K02E10.4	protein_coding	X	2483263		36.1157	-2.67284	0.354562	-4.70149	2.58275e-06	9.10292e-05
WBGene00008255	C51E3.10	protein_coding	V	10160437		451.119	1.87157	0.190311	4.69487	2.66771e-06	9.37558e-05
WBGene00018487	F46C8.8	protein_coding	X	7551202		23.1751	-3.07583	0.424064	-4.69456	2.67186e-06	9.37558e-05
WBGene00008590	F08H9.2	protein_coding	V	14460626		50.2463	2.98028	0.419545	4.69206	2.70471e-06	9.47004e-05
WBGene00006052	ssq-3	protein_coding	IV	7111632	Sperm-Specific family, class Q	84.9281	2.86649	0.414301	4.68983	2.73426e-06	9.55255e-05
WBGene00012087	T27E7.1	protein_coding	IV	14519759		62.6771	2.81192	0.39264	4.68758	2.7646e-06	9.63748e-05
WBGene00194695	B0462.5	protein_coding	V	18322215		181.62	1.79313	0.173416	4.68427	2.80954e-06	9.7728e-05
WBGene00020456	fbxa-60	protein_coding	III	944780	F-box A protein	1516.4	1.44915	0.0975711	4.66281	3.11927e-06	0.000108266
WBGene00001552	gcy-32	protein_coding	V	13912080	Soluble guanylate cyclase gcy-32	19.4874	-4.40866	0.511938	-4.65492	3.24101e-06	0.000112247
WBGene00008891	clec-42	protein_coding	V	18191443	C-type LECtin	34.5963	3.68233	0.493142	4.64436	3.41134e-06	0.00011789
WBGene00017322	clec-160	protein_coding	III	8272956	C-type lectin domain-containing protein 160	322.689	1.57112	0.125083	4.64103	3.4667e-06	0.000119545
WBGene00000681	col-107	protein_coding	IV	1548724	COLlagen	276.146	-1.53974	0.116665	-4.63531	3.56403e-06	0.000122373
WBGene00017594	F19C7.4	protein_coding	IV	4603107		224.635	1.70946	0.156158	4.6354	3.56243e-06	0.000122373
WBGene00000639	col-63	protein_coding	I	8243693	COLlagen	18.6082	4.09893	0.541883	4.63008	3.65524e-06	0.000125235
WBGene00008194	C49C3.4	protein_coding	IV	17320795		4841.48	1.25347	0.0553109	4.61545	3.92246e-06	0.000134103
WBGene00006947	wrt-1	protein_coding	II	7531155	Warthog protein 1 Warthog protein 1 N-product Warthog protein 1 C-product	66.1567	-2.53627	0.336995	-4.61067	4.0137e-06	0.000136929
WBGene00013900	ugt-18	protein_coding	V	12820265	UDP-glucuronosyltransferase	440.493	2.72126	0.407078	4.60746	4.07616e-06	0.000138763
WBGene00195165	F57G4.11	protein_coding	V	17625127		16.3215	3.55493	0.500567	4.60505	4.12361e-06	0.00014008
WBGene00010267	lips-9	protein_coding	II	12933855	LIPaSe related	15.7536	-3.72298	0.505014	-4.6008	4.20878e-06	0.000142669
WBGene00013837	fbxa-30	protein_coding	III	1274514	F-box A protein	85.3427	2.47954	0.333166	4.60022	4.22048e-06	0.000142763
WBGene00021113	gsp-3	protein_coding	I	4709317	Serine/threonine-protein phosphatase	69.3938	2.95111	0.430171	4.59906	4.24393e-06	0.000143253
WBGene00002273	lec-10	protein_coding	V	6488199	Galectin	6556.35	1.41826	0.0922094	4.59074	4.41675e-06	0.000148772
WBGene00010049	F54D5.3	protein_coding	II	11571805		5132.56	1.42604	0.094557	4.56183	5.07105e-06	0.000170451
WBGene00003703	nhr-113	protein_coding	I	11473218	Nuclear Hormone Receptor family	17.7259	-3.2377	0.453915	-4.55045	5.35314e-06	0.000179555
WBGene00001690	grd-1	protein_coding	X	11109450	GRounDhog (hedgehog-like family)	30.1347	-2.55964	0.338635	-4.53006	5.89671e-06	0.000197373
WBGene00018295	oac-29	protein_coding	V	8631892	O-ACyltransferase homolog	21.8292	-2.98621	0.419176	-4.52302	6.0963e-06	0.000203627
WBGene00003092	lys-3	protein_coding	V	10282204	Lysozyme-like protein 3	473.954	1.93205	0.214287	4.52243	6.11342e-06	0.000203772
WBGene00019285	cbn-1	protein_coding	II	328564	Calcium BiNding protein homolog	24.1331	-2.96354	0.418267	-4.52116	6.15006e-06	0.000204566
WBGene00021582	clec-71	protein_coding	IV	3937464	C-type LECtin	19.8131	2.94512	0.432999	4.51436	6.35068e-06	0.0002108
WBGene00001714	grl-5	protein_coding	V	4412747	GRound-Like (grd related)	15.9343	-3.88157	0.529088	-4.51314	6.38759e-06	0.000211586
WBGene00020560	T19C3.2	protein_coding	III	614707		28.3359	-2.68647	0.362769	-4.51101	6.45183e-06	0.000213271
WBGene00016335	gba-1	protein_coding	II	2176892	Putative glucosylceramidase 1	721.524	1.44806	0.10078	4.50664	6.58611e-06	0.00021726
WBGene00000623	col-46	protein_coding	I	741879	COLlagen	15.4559	-4.04993	0.536632	-4.50457	6.65061e-06	0.000218935
WBGene00077525	C41G7.8	protein_coding	I	9530816		297.537	1.66821	0.151908	4.49657	6.90597e-06	0.000226874
WBGene00006272	str-245	protein_coding	I	14852818	Seven TM Receptor	104.699	1.96022	0.220793	4.48585	7.26228e-06	0.00023809
WBGene00013474	Y69E1A.2	protein_coding	IV	10949817		78.9425	2.35897	0.316437	4.48341	7.34585e-06	0.000240336
WBGene00004020	pho-1	protein_coding	II	5233158	intestinal acid PHOsphatase	2869.9	1.50483	0.114634	4.47146	7.76879e-06	0.000253653
WBGene00010516	K02E11.7	protein_coding	V	14253488		87.9835	-1.83586	0.188037	-4.46586	7.97467e-06	0.000259844
WBGene00012429	Y11D7A.5	protein_coding	IV	9244511		17.3524	-3.27617	0.470213	-4.45811	8.26846e-06	0.000268868
WBGene00043702	Y54G2A.7	protein_coding	IV	2838621		83.0401	2.03429	0.239608	4.45371	8.43997e-06	0.000273887
WBGene00019759	M03F4.6	protein_coding	X	4964409		41.6194	-2.31647	0.298173	-4.45311	8.46367e-06	0.000274099
WBGene00008167	acox-5	protein_coding	III	9586613	Probable peroxisomal acyl-coenzyme A oxidase	1656.47	1.49564	0.113578	4.43122	9.37013e-06	0.000302841
WBGene00002188	kgb-2	protein_coding	IV	3606796	Mitogen-activated protein kinase	181.278	1.71749	0.166176	4.42228	9.76641e-06	0.000315011
WBGene00003640	nhr-50	protein_coding	V	15997779	Nuclear Hormone Receptor family	302.302	1.54393	0.125345	4.41698	1.00088e-05	0.00032218
WBGene00013473	Y69E1A.1	protein_coding	IV	10947232		78.2484	2.48732	0.352076	4.41561	1.00724e-05	0.000323572
WBGene00018562	F47D12.6	protein_coding	III	6286633		276.166	1.60549	0.140545	4.39739	1.09559e-05	0.00035125
WBGene00009261	F30A10.2	protein_coding	I	9479108		20.0728	-2.95517	0.424178	-4.38963	1.13544e-05	0.000363294
WBGene00016058	nspd-3	protein_coding	IV	5162743	Nematode Specific Peptide family, group D	75.9731	2.52723	0.367333	4.38516	1.15903e-05	0.000370102
WBGene00011763	T14B1.1	protein_coding	X	9664538		148.414	-1.71512	0.165902	-4.37219	1.23007e-05	0.000392001
WBGene00000133	amt-1	protein_coding	X	4571448	Putative ammonium transporter 1	33.7139	-2.65065	0.370912	-4.36031	1.29881e-05	0.000413083
WBGene00016785	C49G7.7	protein_coding	V	4034476		741.129	1.83731	0.198472	4.35566	1.32668e-05	0.000421108
WBGene00000170	aqp-2	protein_coding	II	9258913	AQuaPorin or aquaglyceroporin related	1326.84	-1.3304	0.0766173	-4.35457	1.33328e-05	0.000422363
WBGene00011852	clec-26	protein_coding	V	16848634	C-type LECtin	32.8263	2.43924	0.343218	4.34589	1.38714e-05	0.000438555
WBGene00004965	spe-11	protein_coding	I	5330576	Spermatocyte protein spe-11	42.2014	3.13229	0.460101	4.3427	1.40742e-05	0.000443211
WBGene00009375	F34D10.6	protein_coding	III	3747560		62.2884	-2.11094	0.262724	-4.3431	1.40485e-05	0.000443211
WBGene00020072	R13H9.6	protein_coding	IV	5067364		20.5878	3.06698	0.576954	4.34165	1.41418e-05	0.000444465
WBGene00001135	eat-4	protein_coding	III	9136916	Probable vesicular glutamate transporter eat-4	73.1411	-1.94498	0.219984	-4.33939	1.4288e-05	0.000448178
WBGene00003438	msp-45	protein_coding	II	5156700	Major sperm protein 19/31/40/45/50/51/53/59/61/65/81/113/142	60.2406	2.58412	0.383821	4.33477	1.45915e-05	0.000456798
WBGene00000748	col-175	protein_coding	X	9233642	COLlagen	16.3661	3.81738	0.525615	4.33316	1.46985e-05	0.000457063
WBGene00008965	mltn-10	protein_coding	II	14623063	MLt-TeN (mlt-10) related	20.5646	2.5909	0.377478	4.33292	1.47144e-05	0.000457063
WBGene00009347	F32H5.1	protein_coding	V	13356087		1709.1	1.37615	0.0878518	4.33358	1.46703e-05	0.000457063
WBGene00022562	ZC204.12	protein_coding	II	1656263		284.35	1.60008	0.141201	4.33394	1.46466e-05	0.000457063
WBGene00012938	Y47D3A.32	protein_coding	III	11252416		101.877	1.88956	0.211497	4.32749	1.50819e-05	0.000467568
WBGene00022490	Y119D3B.13	protein_coding	III	1182002		439.81	1.46631	0.109411	4.3267	1.51357e-05	0.000468325
WBGene00003734	nhx-6	protein_coding	II	1670833	Sodium/hydrogen exchanger	16.2159	3.16868	0.494899	4.32445	1.52913e-05	0.000472225
WBGene00015574	irg-1	protein_coding	V	3523587	Infection Response Gene	245.819	1.77297	0.183947	4.32318	1.53798e-05	0.000474043
WBGene00007072	ugt-1	protein_coding	V	10395677	UDP-GlucuronosylTransferase	238.233	1.62993	0.149165	4.32163	1.54881e-05	0.000476432
WBGene00009133	bed-3	protein_coding	IV	9916528	BED-type zinc finger putative transcription factor	111.35	-1.75908	0.178007	-4.32122	1.5517e-05	0.000476432
WBGene00045067	F07C6.6	protein_coding	IV	12792795		13.1424	3.35313	0.508417	4.31669	1.58388e-05	0.00048538
WBGene00009344	F32H2.7	protein_coding	I	8995578		42.3262	3.02081	0.459017	4.30872	1.642e-05	0.000502225
WBGene00003429	msp-31	protein_coding	II	4916179	Major sperm protein 19/31/40/45/50/51/53/59/61/65/81/113/142	98.9054	2.21512	0.295419	4.30301	1.68491e-05	0.000514365
WBGene00009884	F49C12.15	protein_coding	IV	9324442		216.142	1.85909	0.206673	4.30179	1.69426e-05	0.000516233
WBGene00021731	Y49G5A.1	protein_coding	V	5286343		83.4397	-2.14765	0.269193	-4.29661	1.73433e-05	0.000527433
WBGene00010345	F59F5.7	protein_coding	X	10559535		27.2588	-2.48031	0.34018	-4.29375	1.75678e-05	0.000533245
WBGene00019730	asns-2	protein_coding	X	8748431	Asparagine synthetase	766.973	-1.59422	0.140979	-4.29151	1.77463e-05	0.000537642
WBGene00015300	C01F1.5	protein_coding	II	4279789		15.2448	-3.30041	0.488676	-4.2824	1.84888e-05	0.000559075
WBGene00003432	msp-36	protein_coding	IV	10095400	Major sperm protein 10/36/56/76	139.807	2.81498	0.475537	4.26996	1.9551e-05	0.000590079
WBGene00008477	clec-17	protein_coding	I	12430029	C-type LECtin	152.691	2.18658	0.289674	4.2649	1.99994e-05	0.000602473
WBGene00016541	C39H7.1	protein_coding	IV	5631739		65.9457	2.43226	0.352993	4.26159	2.02974e-05	0.000610297
WBGene00005931	fbxa-199	protein_coding	V	15397385	F-box A protein	31.5653	2.48532	0.36246	4.25743	2.06789e-05	0.000620601
WBGene00015080	B0244.5	protein_coding	III	5744870	Putative G-protein coupled receptor B0244.5	27.5996	2.43841	0.349885	4.25401	2.0998e-05	0.000628995
WBGene00016260	C30F12.1	protein_coding	I	6954411		698.528	1.46686	0.111608	4.24884	2.14882e-05	0.000642473
WBGene00022038	Y65B4BL.6	protein_coding	I	520113		19.9821	-2.7541	0.400683	-4.24775	2.15925e-05	0.000644385
WBGene00015523	ztf-30	protein_coding	III	8595368	Zinc finger transcription factor family protein 30	18.6848	-2.93021	0.434176	-4.24479	2.18793e-05	0.000651727
WBGene00012593	nspe-7	protein_coding	II	12627187	Nematode Specific Peptide family, group E	9.80193	3.49931	0.542324	4.23228	2.3133e-05	0.000686509
WBGene00017302	F09F7.5	protein_coding	III	5547068		769.353	1.48928	0.117569	4.23256	2.31048e-05	0.000686509
WBGene00018951	F56C9.7	protein_coding	III	7313143		3590.53	1.40732	0.0977533	4.22479	2.39163e-05	0.000708437
WBGene00003457	msp-64	protein_coding	II	5809924	Major sperm protein 19/31/40/45/50/51/53/59/61/65/81/113/142	63.1785	2.52062	0.381405	4.22392	2.40086e-05	0.000709854
WBGene00003178	mec-17	protein_coding	IV	7983862	Alpha-tubulin N-acetyltransferase 1	617.029	-1.37585	0.0897466	-4.22002	2.44286e-05	0.000720936
WBGene00000704	col-130	protein_coding	IV	12427505	COLlagen	59.7183	-2.10802	0.269922	-4.21412	2.50759e-05	0.000738676
WBGene00000626	col-49	protein_coding	I	3137188	COLlagen	7.55951	3.36345	0.614297	4.21029	2.5504e-05	0.000749902
WBGene00020357	T08E11.1	protein_coding	II	1836504		27.4854	2.39678	0.343536	4.20913	2.56354e-05	0.000751901
WBGene00044492	Y54G2A.49	protein_coding	IV	2851693		58.7973	2.03871	0.255796	4.20886	2.56662e-05	0.000751901
WBGene00001174	egl-5	protein_coding	III	7814382	Homeobox protein egl-5	77.5099	-1.9429	0.227646	-4.20729	2.5845e-05	0.000755752
WBGene00017471	F14H12.3	protein_coding	X	4344251		102.218	2.12375	0.279847	4.19864	2.68524e-05	0.000783777
WBGene00017570	F18E9.4	protein_coding	X	8580656		24.4734	-2.60758	0.377642	-4.19318	2.75076e-05	0.000801433
WBGene00006053	ssq-4	protein_coding	IV	5016481	Sperm-Specific family, class Q	312.951	2.71721	0.461097	4.19043	2.78425e-05	0.000808846
WBGene00008553	F07C6.2	protein_coding	IV	12791171		57.3122	2.0295	0.254317	4.19026	2.78633e-05	0.000808846
WBGene00000749	col-176	protein_coding	X	10077613	COLlagen	62.8016	-2.0247	0.24754	-4.18647	2.83325e-05	0.000820975
WBGene00012308	oac-53	protein_coding	V	16624008	O-ACyltransferase homolog	53.5583	2.3293	0.333424	4.18531	2.84781e-05	0.000823697
WBGene00004993	spp-8	protein_coding	IV	8481664	SaPosin-like Protein family	2094.28	1.35397	0.0856164	4.18463	2.85629e-05	0.000824657
WBGene00015152	B0348.2	protein_coding	V	45463		148.247	2.85079	0.511229	4.17839	2.93575e-05	0.000846067
WBGene00013609	clec-37	protein_coding	V	16850394	C-type LECtin	5.73484	3.36876	0.607069	4.17282	3.00846e-05	0.000865461
WBGene00015081	B0244.6	protein_coding	III	5738008	Putative G-protein coupled receptor-like protein B0244.6	104.031	1.89439	0.222663	4.1501	3.3233e-05	0.000954313
WBGene00021580	clec-174	protein_coding	IV	3940213	C-type LECtin	190.208	3.27964	0.455803	4.1484	3.34807e-05	0.0009597
WBGene00018594	aman-3	protein_coding	I	5324511	Alpha-mannosidase	764.574	1.58147	0.143659	4.14015	3.47082e-05	0.000993103
WBGene00000493	che-14	protein_coding	I	5746725	CHE-14 protein; Uncharacterized protein	56.5444	-2.08997	0.271195	-4.11298	3.90581e-05	0.00111557
WBGene00001820	ham-1	protein_coding	IV	12542034		58.3128	-2.05758	0.261007	-4.11151	3.93085e-05	0.00112071
WBGene00016680	C45G9.9	protein_coding	III	5054605		56.4123	2.66938	0.428987	4.10886	3.97621e-05	0.00113163
WBGene00021023	W04B5.6	protein_coding	III	2433550		13.6644	-3.38159	0.512873	-4.10491	4.04465e-05	0.00114905
WBGene00017553	nep-8	protein_coding	II	3403919	NEPrilysin metallopeptidase family	86.1836	2.46223	0.379599	4.10069	4.1192e-05	0.00116816
WBGene00017681	slc-17.5	protein_coding	V	8282375	SLC (SoLute Carrier) homolog	183.19	1.66974	0.167516	4.09663	4.1921e-05	0.00118672
WBGene00003426	msp-19	protein_coding	IV	5260554	Major sperm protein 19/31/40/45/50/51/53/59/61/65/81/113/142	147.525	2.79353	0.51448	4.08611	4.38674e-05	0.00123962
WBGene00014009	lips-6	protein_coding	IV	12014283	LIPaSe related	13.1826	-3.27917	0.496223	-4.07065	4.68828e-05	0.00132249
WBGene00012144	T28H10.3	protein_coding	V	12513021		9373.95	1.31741	0.0789338	4.0684	4.73366e-05	0.00133294
WBGene00021931	Y55F3AM.14	protein_coding	IV	1058845		17.0008	-3.06295	0.480718	-4.06671	4.76811e-05	0.00134028
WBGene00009041	cut-3	protein_coding	II	8445165	CUTiclin	24.9937	2.94295	0.493994	4.06629	4.7767e-05	0.00134033
WBGene00009226	cyp-37B1	protein_coding	V	16278191	CYtochrome P450 family	252.547	1.83555	0.212636	4.05952	4.91735e-05	0.00137738
WBGene00002048	ida-1	protein_coding	III	5755539	related to Islet cell Diabetes Autoantigen	727.68	-1.37879	0.0945568	-4.05825	4.94428e-05	0.00138249
WBGene00010822	M01G12.9	protein_coding	I	12109061		547.667	1.53266	0.13405	4.05511	5.01102e-05	0.0013987
WBGene00013858	ssp-34	protein_coding	IV	10738204	Sperm-specific class P protein 34	29.7783	2.77774	0.445473	4.04811	5.16338e-05	0.00143872
WBGene00021072	W07B8.4	protein_coding	V	1130088		39.6442	2.52194	0.397541	4.04604	5.20923e-05	0.00144896
WBGene00004859	sma-5	protein_coding	X	11997525	Mitogen-activated protein kinase sma-5	861.497	1.3502	0.0878256	4.04007	5.34343e-05	0.00148371
WBGene00015646	mlt-10	protein_coding	II	546705		122.673	-1.9469	0.243573	-4.03575	5.4428e-05	0.00150868
WBGene00007552	C13C12.2	protein_coding	V	12523647		15.1285	-3.12035	0.485768	-4.03155	5.54109e-05	0.00153326
WBGene00015569	C07D10.5	protein_coding	II	7381438		464.726	1.40472	0.101951	4.02957	5.58799e-05	0.00154356
WBGene00021160	gba-4	protein_coding	IV	5344591	Putative glucosylceramidase 4	2106.38	1.54626	0.138411	4.02873	5.60779e-05	0.00154636
WBGene00020860	nspd-10	protein_coding	I	10878047	Nematode Specific Peptide family, group D	33.3054	2.69749	0.438412	4.0241	5.71939e-05	0.00157441
WBGene00020449	fbxa-54	protein_coding	III	956334	F-box A protein	148.625	1.67118	0.171201	4.0221	5.76816e-05	0.0015851
WBGene00044332	clec-36	protein_coding	V	16846867	C-type LECtin	21.6751	2.39561	0.358943	4.02125	5.78906e-05	0.00158811
WBGene00016357	C33F10.11	protein_coding	II	4834159		30.5566	3.00056	0.495286	4.01859	5.85478e-05	0.00160339
WBGene00021325	Y34B4A.9	protein_coding	X	5255194		5017.72	1.41676	0.105467	4.01435	5.96089e-05	0.00162687
WBGene00021529	Y41G9A.5	protein_coding	X	2946667		107.249	-1.91458	0.236016	-4.01448	5.95761e-05	0.00162687
WBGene00194713	F19B10.13	protein_coding	II	3662258		178.906	1.7245	0.186302	4.01032	6.06371e-05	0.0016521
WBGene00007177	oac-1	protein_coding	V	19551016	O-ACyltransferase homolog	11.9	-3.37406	0.512969	-4.00974	6.07861e-05	0.00165334
WBGene00002102	ins-19	protein_coding	II	3126032	INSulin related	137.974	2.32188	0.356082	4.00106	6.30595e-05	0.00171226
WBGene00010091	ssp-35	protein_coding	V	12263368	Sperm Specific family, class P	42.7342	2.69204	0.436065	3.99222	6.54563e-05	0.00177432
WBGene00007599	C15A11.7	protein_coding	I	7405030		479.164	1.47996	0.122569	3.99083	6.58416e-05	0.00178174
WBGene00000841	cul-6	protein_coding	IV	12586486	Cullin-6	427.953	1.52058	0.1337	3.98018	6.88642e-05	0.00186038
WBGene00020445	T12B3.2	protein_coding	IV	7376897		316.143	1.49995	0.128253	3.97596	7.00973e-05	0.0018905
WBGene00017478	F15A8.6	protein_coding	X	4430866	Carboxylic ester hydrolase	1027.21	1.37647	0.0963168	3.97072	7.16551e-05	0.00192925
WBGene00017246	F08D12.2	protein_coding	II	2781655		51.9512	2.23161	0.326353	3.96366	7.38082e-05	0.00198387
WBGene00007808	best-7	protein_coding	IV	11226589	BESTrophin (chloride channel) homolog	449.539	1.45971	0.118355	3.95131	7.77261e-05	0.00208567
WBGene00007685	C18E9.5	protein_coding	II	8969983		752.089	1.31707	0.0812786	3.94769	7.89082e-05	0.00211384
WBGene00009218	acs-20	protein_coding	IV	12392123	fatty Acid CoA Synthetase family	276.746	-1.46275	0.118909	-3.94604	7.94557e-05	0.00212494
WBGene00009903	F49E12.10	protein_coding	II	8391088		130.893	1.9165	0.242301	3.93772	8.2258e-05	0.00219481
WBGene00012529	Y32F6A.4	protein_coding	V	10428727		1368.27	1.28571	0.073364	3.93748	8.23433e-05	0.00219481
WBGene00011486	T05E12.3	protein_coding	V	17076865		384.988	1.40161	0.103855	3.92747	8.58453e-05	0.00228434
WBGene00007601	C15C6.2	protein_coding	I	12203800		143.851	2.18376	0.322558	3.91796	8.93006e-05	0.00237233
WBGene00044759	T06E6.15	protein_coding	V	15398939		29.2015	2.47485	0.396055	3.916	9.00296e-05	0.00238773
WBGene00044109	K02E11.10	protein_coding	V	14239924		13.6946	-3.09524	0.487795	-3.91505	9.03869e-05	0.00239323
WBGene00012433	Y11D7A.9	protein_coding	IV	9254260		37.9652	-2.1702	0.302001	-3.91079	9.19938e-05	0.00243174
WBGene00001603	gln-2	protein_coding	III	9943240	Probable glutamine synthetase	46.2507	2.65835	0.442439	3.90625	9.37388e-05	0.00247377
WBGene00009852	arrd-24	protein_coding	X	13979240	ARRestin Domain protein	54.5434	2.20147	0.324574	3.90409	9.45797e-05	0.00249185
WBGene00004810	skr-4	protein_coding	V	19924224	SKp1 Related (ubiquitin ligase complex component)	727.932	1.39346	0.102519	3.89921	9.65082e-05	0.00253847
WBGene00013197	ttm-5	protein_coding	I	14688672	Putative sphingolipid delta(4)-desaturase/C4-monooxygenase	657.691	1.39487	0.103026	3.89725	9.72918e-05	0.00255487
WBGene00019783	M70.1	protein_coding	IV	2245897		18.1797	2.72466	0.578481	3.89633	9.76632e-05	0.00256041
WBGene00007174	mboa-1	protein_coding	X	16030806	O-acyltransferase	34.5665	-2.17037	0.302278	-3.89248	9.92244e-05	0.00259708
WBGene00015348	C02F5.5	protein_coding	III	8236146		61.1742	2.29852	0.353898	3.89028	0.000100128	0.00261643
WBGene00009517	clec-167	protein_coding	IV	1253137	C-type LECtin	40.5638	3.06962	0.489781	3.88361	0.000102917	0.00268492
WBGene00010545	cbp-2	protein_coding	III	9923174	CBP/p300 homolog	1128.38	1.30007	0.0782904	3.88037	0.000104296	0.00271647
WBGene00004119	pqn-31	protein_coding	V	9109603	Prion-like-(Q/N-rich)-domain-bearing protein	205.537	1.80759	0.217174	3.87947	0.000104684	0.00272211
WBGene00017058	D2062.6	protein_coding	II	2619442		20.2935	3.32933	0.511732	3.87885	0.000104952	0.00272465
WBGene00012069	T26H5.4	protein_coding	V	15447640		27.3889	2.60668	0.561994	3.85205	0.000117133	0.00303595
WBGene00013891	ZC434.3	protein_coding	I	10334659		19.988	-2.63934	0.415986	-3.84218	0.000121947	0.00315561
WBGene00016555	math-20	protein_coding	II	1996537	MATH (meprin-associated Traf homology) domain containing	226.639	1.53747	0.143067	3.84137	0.00012235	0.0031609
WBGene00008101	C44H9.6	protein_coding	V	12842494		346.655	1.39714	0.10512	3.83948	0.000123295	0.00318017
WBGene00008229	C50F4.1	protein_coding	V	9526733		1312.32	1.42746	0.113679	3.8276	0.000129399	0.00333224
WBGene00017802	F26A1.3	protein_coding	III	4826909		22.103	3.05073	0.50453	3.82713	0.000129645	0.0033332
WBGene00013607	clec-27	protein_coding	V	16854646	C-type LECtin	10.7348	3.19661	0.543647	3.82604	0.000130223	0.00334267
WBGene00013290	Y57G11A.2	protein_coding	IV	14517023		103.405	2.33859	0.379635	3.81759	0.000134762	0.00345363
WBGene00015781	C14F11.6	protein_coding	X	6238021		36.9028	-2.24039	0.325547	-3.81708	0.000135039	0.00345519
WBGene00020223	T05A7.6	protein_coding	II	4668644		47.8061	2.88699	0.47625	3.81463	0.000136387	0.00348408
WBGene00001710	grl-1	protein_coding	V	5530723	GRound-Like (grd related)	14.4746	-3.03209	0.49206	-3.81193	0.000137889	0.00351682
WBGene00009008	F21D5.3	protein_coding	IV	8730721		1320.63	1.55444	0.149126	3.80804	0.000140073	0.00356684
WBGene00044501	C55C3.8	protein_coding	IV	5691030		8.20451	3.42799	0.576606	3.80662	0.000140882	0.00358171
WBGene00008743	F13D12.9	protein_coding	II	11707451		43.8803	-2.18704	0.32224	-3.8035	0.000142668	0.00362137
WBGene00001501	ftn-2	protein_coding	I	3680178	Ferritin	6438.64	1.40239	0.107681	3.8003	0.000144518	0.0036625
WBGene00018548	clec-79	protein_coding	IV	3973349	C-type LECtin	36.2489	2.68594	0.458796	3.7975	0.000146162	0.0036983
WBGene00012535	Y37A1A.2	protein_coding	IV	13905990		168.541	1.56386	0.152674	3.78567	0.000153292	0.00387257
WBGene00017312	pitr-5	protein_coding	V	7184910	PIT (mammalian phosphate transporter) Related	133.157	1.81488	0.222884	3.78306	0.000154914	0.00390734
WBGene00008496	F01D5.6	protein_coding	II	14006511		20.9886	-2.59743	0.416538	-3.78212	0.000155499	0.00391593
WBGene00012781	nspd-7	protein_coding	IV	10268662	Nematode Specific Peptide family, group D	51.4527	2.15465	0.322282	3.77418	0.000160537	0.00403644
WBGene00013956	ZK265.3	protein_coding	I	8242106		56.3149	2.36952	0.388497	3.77348	0.000160983	0.00404128
WBGene00016134	C26B9.5	protein_coding	X	5329455		2270.99	1.26076	0.0700407	3.76446	0.00016691	0.00418349
WBGene00019958	R08E3.2	protein_coding	X	4822659		937.321	1.43738	0.118453	3.76395	0.000167247	0.00418537
WBGene00020070	rmd-6	protein_coding	IV	5068868	Regulator of Microtubule Dynamics	24.4584	2.9626	0.497792	3.76184	0.000168671	0.0042144
WBGene00015907	C17F3.1	protein_coding	I	6669184		30.3059	2.93172	0.491618	3.75692	0.000172016	0.00429127
WBGene00044382	Y14H12A.2	protein_coding	II	3988700		16.3133	2.55211	0.433146	3.74446	0.000180784	0.00450295
WBGene00006970	zag-1	protein_coding	IV	3855843	Zinc finger E-box-binding homeobox protein zag-1	105.024	-1.65457	0.176503	-3.74391	0.000181179	0.00450578
WBGene00044534	H23N18.6	protein_coding	V	4913061		25.2669	2.32253	0.370706	3.74299	0.000181841	0.00451521
WBGene00016671	C45G7.4	protein_coding	IV	2432993		29.0818	-2.5028	0.414473	-3.74124	0.000183112	0.0045397
WBGene00009856	clec-24	protein_coding	V	16862012	C-type LECtin	9.90241	2.9346	0.521382	3.74076	0.000183466	0.00454142
WBGene00020156	T02B11.4	protein_coding	V	869071		59.3818	-2.29995	0.367157	-3.73482	0.000187851	0.00464276
WBGene00014247	ZK1307.4	protein_coding	II	9650959		23.909	2.82826	0.490552	3.73081	0.000190866	0.00471
WBGene00012207	W02B12.12	protein_coding	II	11476755		48.9595	2.46101	0.416602	3.72797	0.00019303	0.00475604
WBGene00015828	math-14	protein_coding	II	1869410	MATH (meprin-associated Traf homology) domain containing	335.366	1.61286	0.169663	3.72215	0.000197537	0.00485212
WBGene00020855	hpo-36	protein_coding	V	3727260		52.7777	-2.13725	0.316889	-3.72229	0.000197423	0.00485212
WBGene00006533	tba-7	protein_coding	III	11368415	TuBulin, Alpha	813.298	1.3788	0.103672	3.7173	0.00020136	0.00493842
WBGene00001063	dpy-1	protein_coding	III	2034977	DumPY: shorter than wild-type	23.3027	-2.53807	0.415007	-3.71179	0.000205799	0.00503955
WBGene00007605	asp-10	protein_coding	V	12742041	ASpartyl Protease	32425.5	1.45476	0.125171	3.7086	0.000208408	0.00509564
WBGene00003450	msp-57	protein_coding	IV	5062543	Major sperm protein 55/57	210.305	2.58174	0.501296	3.70342	0.000212711	0.00519288
WBGene00003469	msp-142	protein_coding	II	5797893	Major sperm protein 19/31/40/45/50/51/53/59/61/65/81/113/142	72.0751	2.20888	0.348982	3.70256	0.000213439	0.00520269
WBGene00018200	btb-17	protein_coding	II	3295414	BTB (Broad/complex/Tramtrack/Bric a brac) domain protein	127.4	1.6146	0.170812	3.7004	0.00021526	0.00523908
WBGene00004048	plx-2	protein_coding	II	14417888	Plexin-2	127.325	-1.63013	0.173975	-3.68875	0.000225358	0.00547651
WBGene00017978	F32B5.4	protein_coding	I	2692077		19.2827	3.15968	0.520077	3.68489	0.000228799	0.00555168
WBGene00000016	abf-5	protein_coding	X	12792849	AntiBacterial Factor related	71.0218	2.00597	0.288014	3.68374	0.00022984	0.00556847
WBGene00016542	C39H7.4	protein_coding	IV	5612012		992.116	1.29965	0.0825846	3.67801	0.000235061	0.00568635
WBGene00010754	K10G4.5	protein_coding	V	17298341		20.0302	2.35426	0.387175	3.67644	0.000236516	0.00571287
WBGene00011173	acs-18	protein_coding	IV	10310791	fatty Acid CoA Synthetase family	36.6137	2.73977	0.483342	3.67174	0.000240905	0.0058101
WBGene00001475	fmi-1	protein_coding	V	13019068	FlaMIngo (cadherin plus 7TM domain) homolog	196.41	-1.48235	0.133956	-3.65137	0.000260843	0.00627203
WBGene00011130	zip-6	protein_coding	IV	11213446	bZIP transcription factor family	30.1295	2.45419	0.425776	3.65139	0.00026082	0.00627203
WBGene00020326	math-38	protein_coding	II	1577369	MATH (meprin-associated Traf homology) domain containing	40.646	1.96062	0.273779	3.64581	0.00026655	0.00639961
WBGene00011134	ssp-33	protein_coding	V	14711341	Sperm Specific family, class P	8.63904	2.65683	0.601661	3.64372	0.000268731	0.00644227
WBGene00017103	klo-2	protein_coding	III	2446223	KLOtho (mammalian aging-associated protein) homolog	482.146	1.42875	0.120405	3.63082	0.000282519	0.00676266
WBGene00011539	fbxa-135	protein_coding	V	15402277	F-box A protein	26.2739	2.48443	0.439839	3.62608	0.000287752	0.00687761
WBGene00022860	ZK1193.4	protein_coding	X	422890		66.5745	1.86808	0.250016	3.61781	0.000297106	0.00709059
WBGene00010900	M28.9	protein_coding	II	10639457		33.959	2.45669	0.430093	3.61052	0.000305583	0.00728201
WBGene00003444	msp-51	protein_coding	IV	5294922	Major sperm protein 19/31/40/45/50/51/53/59/61/65/81/113/142	61.1061	2.39014	0.421786	3.60487	0.000312314	0.0074313
WBGene00019014	F57C12.2	protein_coding	X	549356		130.777	1.62509	0.178926	3.6036	0.000313842	0.00745655
WBGene00020921	W01C8.5	protein_coding	X	5694475	Uncharacterized protein; XG314	906.462	1.37297	0.105554	3.59558	0.000323675	0.00767875
WBGene00044471	F56D6.9	protein_coding	IV	3892998		15.955	-2.94344	0.5311	-3.59435	0.000325201	0.00770351
WBGene00001691	grd-2	protein_coding	V	20609863	GRounDhog (hedgehog-like family)	10.9616	-3.29881	0.565599	-3.59164	0.000328606	0.00777263
WBGene00022572	ZC239.14	protein_coding	II	3221125		168.179	1.84211	0.247608	3.59099	0.000329428	0.00778055
WBGene00003663	nhr-73	protein_coding	I	11433671	Nuclear Hormone Receptor family	7.55776	-2.82384	0.623756	-3.58505	0.000337017	0.00794802
WBGene00009798	F46G10.4	protein_coding	X	13334077		396.368	1.40419	0.115033	3.58356	0.000338945	0.0079817
WBGene00021321	Y34B4A.5	protein_coding	X	5257213		265.937	1.5039	0.14415	3.58124	0.000341961	0.00804086
WBGene00006539	tbb-6	protein_coding	V	12261804	TuBulin, Beta	512.771	1.57713	0.166625	3.58048	0.000342958	0.00805246
WBGene00000902	daf-6	protein_coding	X	14888487		37.0874	-2.19198	0.347455	-3.57198	0.000354288	0.00828193
WBGene00009859	clec-33	protein_coding	V	16867678	C-type LECtin	6.52517	3.25576	0.592678	3.57203	0.000354226	0.00828193
WBGene00017336	ugt-41	protein_coding	V	7161068	UDP-GlucuronosylTransferase	804.767	-1.63638	0.187472	-3.57265	0.000353389	0.00828193
WBGene00138711	R07B1.13	protein_coding	X	9869836		10.7182	-3.17926	0.543901	-3.56887	0.00035852	0.00836861
WBGene00013854	cyc-2.2	protein_coding	V	12611680	Probable cytochrome c 2.2	33.2797	2.45672	0.440192	3.56513	0.000363681	0.00846433
WBGene00013901	ugt-16	protein_coding	V	12825026	UDP-glucuronosyltransferase	1083.02	1.49067	0.141613	3.56547	0.000363207	0.00846433
WBGene00020713	T23B3.5	protein_coding	I	6705548		36.7619	2.60619	0.473791	3.56284	0.000366865	0.008526
WBGene00016329	osr-1	protein_coding	I	5200258	Osmotic stress resistance protein; Uncharacterized protein	24.4589	-2.28324	0.359973	-3.54771	0.00038859	0.00901777
WBGene00022497	Y119D3B.21	protein_coding	III	1214952		4976.63	1.57334	0.166511	3.54327	0.000395196	0.00915776
WBGene00004229	ptr-15	protein_coding	V	6966395	PaTched Related family	33.1513	-2.15429	0.335538	-3.54123	0.000398264	0.00921549
WBGene00020972	trpl-2	protein_coding	IV	4326716	TRP-channel-Like	214.535	1.49227	0.142632	3.54018	0.000399858	0.00923898
WBGene00004994	spp-9	protein_coding	X	11487788	SaPosin-like Protein family	3.92861	2.86081	0.633486	3.53057	0.000414661	0.00956716
WBGene00013104	Y51H4A.8	protein_coding	IV	16575098		183.376	-1.59042	0.169979	-3.52915	0.000416892	0.00960476
WBGene00021993	Y59E9AL.3	protein_coding	IV	5218832		152.615	2.0474	0.31948	3.51454	0.000440512	0.0101343
WBGene00005657	srr-6	protein_coding	V	5012994	Serpentine Receptor, class R	703.505	1.6386	0.189355	3.5095	0.000448955	0.0103137
WBGene00020529	T15B7.17	protein_coding	V	6813700		16.0863	2.50572	0.453358	3.50604	0.000454831	0.0104337
WBGene00010254	F58E6.5	protein_coding	V	9753425	Major sperm protein	50.6146	2.37511	0.430524	3.50404	0.00045825	0.010497
WBGene00007506	C10C5.2	protein_coding	IV	9371508		657.842	1.45261	0.132504	3.50246	0.000460988	0.0105446
WBGene00013439	Y66D12A.13	protein_coding	III	11548377		183.186	1.56592	0.166752	3.49708	0.000470377	0.0107336
WBGene00020859	bath-25	protein_coding	I	10876209	BTB and MATH domain containing	86.5684	2.16605	0.364378	3.49696	0.000470593	0.0107336
WBGene00021619	Y47D7A.6	protein_coding	V	4417738		10.1283	2.85741	0.543625	3.49504	0.000473982	0.0107954
WBGene00006609	tre-3	protein_coding	V	11709775	Trehalase	1213.03	1.31498	0.0915592	3.49418	0.000475515	0.0108149
WBGene00010116	F55F3.2	protein_coding	X	13760290	Carboxylic ester hydrolase	321.705	1.43152	0.126205	3.49181	0.000479761	0.010896
WBGene00017542	F17E9.5	protein_coding	IV	8345818		67.6275	2.28216	0.40297	3.48852	0.0004857	0.0110152
WBGene00009843	F48C5.2	protein_coding	X	11452038		37.0755	-1.98968	0.289157	-3.48631	0.000489728	0.0110908
WBGene00017851	F27C1.1	protein_coding	I	5434807		142.072	2.39575	0.45746	3.48166	0.000498315	0.0112693
WBGene00010334	del-5	protein_coding	X	11004991	DEgenerin Like	233.727	1.49909	0.147117	3.48098	0.000499579	0.0112819
WBGene00021814	Y53G8AR.7	protein_coding	III	3282308		303.66	1.39083	0.114514	3.47929	0.000502751	0.0113375
WBGene00020609	T20D4.3	protein_coding	V	3418263		41.4741	-2.27802	0.389069	-3.47597	0.000509001	0.0114622
WBGene00021389	Y38A10A.2	protein_coding	V	6057364		33.7053	-2.09535	0.321639	-3.47292	0.000514824	0.011577
WBGene00020256	T05C3.6	protein_coding	V	5490370		339.633	1.38932	0.114263	3.47214	0.000516332	0.0115946
WBGene00012201	W02B12.1	protein_coding	II	11449020		702.757	1.3405	0.100097	3.46081	0.000538543	0.0120764
WBGene00012464	arrd-7	protein_coding	II	12060228	ARRestin Domain protein	747.366	1.35171	0.103835	3.4504	0.000559761	0.0125346
WBGene00012086	clec-144	protein_coding	II	11831076	C-type LECtin	10.5343	2.98418	0.55204	3.44461	0.000571889	0.0127882
WBGene00004394	rol-1	protein_coding	II	12172573	ROLler: helically twisted, animals roll when moving	9.81069	3.11774	0.577042	3.443	0.000575301	0.0128465
WBGene00015085	B0244.10	protein_coding	III	5733997	Putative G-protein coupled receptor B0244.10	233.493	1.50072	0.149462	3.43852	0.000584906	0.0130427
WBGene00011879	pho-7	protein_coding	X	10938197	intestinal acid PHOsphatase	185.529	1.53917	0.161417	3.43462	0.000593388	0.0132134
WBGene00010377	nspa-1	protein_coding	V	14886803	Nematode Specific Peptide family, group A	31.9711	2.5136	0.473878	3.43102	0.000601319	0.0133714
WBGene00016781	C49G7.3	protein_coding	V	4046405		680.487	1.49923	0.15003	3.42388	0.000617332	0.0137084
WBGene00009304	eva-1	protein_coding	I	14829667		96.7896	-1.61661	0.183258	-3.41455	0.00063888	0.0141672
WBGene00009907	F49H6.3	protein_coding	V	17014401		8.89592	2.38976	0.619943	3.41036	0.000648782	0.0143668
WBGene00010474	K01D12.15	protein_coding	V	12386312		10.6359	2.43584	0.606198	3.40347	0.000665349	0.0147132
WBGene00021002	W03F9.4	protein_coding	V	147526		44.123	-1.95807	0.289794	-3.40026	0.000673226	0.0148668
WBGene00012926	Y47D3A.13	protein_coding	III	11223446		22.5955	2.69953	0.510444	3.39862	0.000677257	0.0149352
WBGene00235268	Y54G2A.76	protein_coding	IV	2809446		17.6043	-2.53087	0.436502	-3.39724	0.000680701	0.0149904
WBGene00007322	C05B5.5	protein_coding	III	10001375	Uncharacterized F-box protein C05B5.5	75.5035	1.7195	0.22057	3.39282	0.000691781	0.0152135
WBGene00008498	F01D5.8	protein_coding	II	14010722		386.652	1.44212	0.133594	3.39051	0.000697639	0.0153212
WBGene00007584	C14C10.1	protein_coding	V	12588428		74.1913	2.13572	0.364346	3.38764	0.00070496	0.0154607
WBGene00012809	Y43F8A.2	protein_coding	V	19371568		33.4843	2.4702	0.469286	3.38589	0.000709484	0.0155386
WBGene00003424	msp-3	protein_coding	II	4785861	Major sperm protein 3	52.4423	2.23376	0.398766	3.37718	0.000732324	0.0160054
WBGene00020187	gsp-4	protein_coding	I	3838237	Serine/threonine-protein phosphatase	59.4676	2.16454	0.374393	3.377	0.000732805	0.0160054
WBGene00000213	asm-3	protein_coding	IV	520210	Putative sphingomyelin phosphodiesterase asm-3	42.4341	-2.03214	0.309739	-3.37567	0.000736349	0.0160609
WBGene00016962	C56C10.4	protein_coding	II	6583039		14.672	-2.83875	0.530741	-3.37237	0.000745249	0.0162328
WBGene00019406	acdh-8	protein_coding	II	5794507	Acyl CoA DeHydrogenase	35.7012	2.34658	0.433742	3.37022	0.000751082	0.0163376
WBGene00013771	Y113G7C.1	protein_coding	V	20317837	Protein-tyrosine-phosphatase	51.6947	2.39771	0.455766	3.35764	0.000786101	0.017076
WBGene00000136	amt-4	protein_coding	X	4565302	Ammonium transporter	643.736	1.31155	0.0943348	3.35674	0.000788681	0.0171088
WBGene00012595	Y38E10A.17	protein_coding	II	12632586		102.432	2.00751	0.324725	3.34422	0.000825149	0.0178756
WBGene00016758	C49A9.4	protein_coding	IV	6219604		299.172	1.35266	0.107567	3.34053	0.000836175	0.0180899
WBGene00007170	B0393.5	protein_coding	III	4765833		85.4178	-1.73359	0.229605	-3.33495	0.000853144	0.0184321
WBGene00011330	T01D3.6	protein_coding	V	13716849		4461.2	1.38128	0.116861	3.33353	0.000857517	0.0185015
WBGene00004023	pho-4	protein_coding	II	5236094	intestinal acid PHOsphatase	165.248	1.518	0.160081	3.33219	0.00086166	0.0185658
WBGene00006044	ssp-16	protein_coding	I	6102032	Sperm-specific class P protein 16	29.8022	2.49709	0.482802	3.32889	0.000871917	0.0187615
WBGene00015051	B0218.7	protein_coding	IV	8164594		27.8982	2.50239	0.495843	3.32809	0.000874426	0.0187902
WBGene00000216	asp-3	protein_coding	X	6791064	Aspartic protease 3	28047.5	1.27893	0.0851752	3.32538	0.000882988	0.0189486
WBGene00001549	gcy-25	protein_coding	IV	15872933	Receptor-type guanylate cyclase gcy-25	6.31464	-3.47864	0.609387	-3.31979	0.000900846	0.0192809
WBGene00008296	cdr-2	protein_coding	V	12414622	CaDmium Responsive	1707.71	1.54917	0.170765	3.31978	0.000900886	0.0192809
WBGene00006742	unc-2	protein_coding	X	2710920	High voltage activated calcium channel alpha-1 subunit; Uncharacterized protein	395.68	-1.53759	0.166962	-3.31357	0.000921145	0.0196881
WBGene00008292	C54C8.4	protein_coding	I	12449992		6.14928	-3.61399	0.621633	-3.30792	0.000939922	0.0200626
WBGene00012028	srz-99	protein_coding	V	16730261	Serpentine Receptor, class Z	50.8678	1.77751	0.245761	3.30552	0.000948009	0.0202082
WBGene00021480	Y39H10A.4	protein_coding	V	3733143		18.4937	-2.38067	0.425032	-3.29919	0.000969642	0.0206143
WBGene00022006	mpst-5	protein_coding	IV	8567183	MercaptoPyruvate SulfurTransferase homolog	34.6909	2.3995	0.468299	3.29927	0.000969368	0.0206143
WBGene00003458	msp-65	protein_coding	IV	5316488	Major sperm protein 19/31/40/45/50/51/53/59/61/65/81/113/142	32.4101	2.31708	0.440844	3.29324	0.000990401	0.0210276
WBGene00022374	nhr-277	protein_coding	IV	2743007	Nuclear Hormone Receptor family	25.2446	-2.17076	0.361116	-3.28676	0.00101348	0.0214891
WBGene00014143	ZK899.5	protein_coding	X	9459911		4.35905	-2.75906	0.609458	-3.28043	0.0010365	0.021948
WBGene00000738	col-165	protein_coding	X	4353618	COLlagen	6.63774	2.97397	0.648984	3.27579	0.00105366	0.0222818
WBGene00020715	nspd-4	protein_coding	II	4842564	Nematode Specific Peptide family, group D	35.7582	2.28	0.430182	3.27391	0.00106071	0.0224011
WBGene00001506	fut-2	protein_coding	V	6573983	FUcosyl Transferase	29.1068	2.15577	0.380212	3.25114	0.00114941	0.0242105
WBGene00020358	math-39	protein_coding	II	1832343	MATH (meprin-associated Traf homology) domain containing	106.724	1.63596	0.203175	3.25124	0.00114901	0.0242105
WBGene00003877	pept-1	protein_coding	X	6456687	Peptide transporter family 1	2975.44	1.29995	0.0941943	3.23965	0.00119678	0.025175
WBGene00012892	Y45F10D.14	protein_coding	IV	13804062		14.1746	-2.55545	0.4816	-3.23587	0.00121273	0.0254768
WBGene00012540	Y37A1B.7	protein_coding	IV	14042593		21.0614	-2.47289	0.444378	-3.23425	0.00121962	0.025588
WBGene00007439	C08E8.3	protein_coding	V	18350148		109.975	2.45407	0.484155	3.23243	0.00122743	0.0257181
WBGene00019165	mpz-4	protein_coding	IV	4825520	Multiple PDZ domain protein	18.5507	2.55808	0.515123	3.23182	0.00123004	0.0257388
WBGene00010070	nep-17	protein_coding	II	13507819	NEPrilysin metallopeptidase family	12483.6	1.34552	0.109149	3.23062	0.0012352	0.0258131
WBGene00020728	T23E1.1	protein_coding	IV	3151361		16.1552	-2.48596	0.458098	-3.22709	0.00125057	0.0261002
WBGene00003449	msp-56	protein_coding	IV	9841443	Major sperm protein 10/36/56/76	37.9248	2.27651	0.438218	3.21765	0.00129244	0.0269389
WBGene00000984	dhs-21	protein_coding	V	12731772	L-xylulose reductase	833.41	1.34335	0.109	3.21458	0.00130634	0.0271931
WBGene00016619	C43H6.6	protein_coding	X	2395505		6.14615	-3.20817	0.594995	-3.21114	0.00132207	0.0274847
WBGene00020071	R13H9.5	protein_coding	IV	5065686		20.7199	2.55694	0.562113	3.21024	0.00132625	0.0275356
WBGene00011235	suro-1	protein_coding	I	7871584	SUPpressor of ROller	78.0117	-1.76342	0.245976	-3.20983	0.00132814	0.027539
WBGene00005661	srr-10	protein_coding	V	7735619	Serpentine Receptor, class R	30.0108	2.46015	0.510551	3.2077	0.001338	0.0277075
WBGene00016259	C30F8.3	protein_coding	I	5096601		11.2695	-2.6735	0.499812	-3.20343	0.001358	0.0280853
WBGene00018195	btb-16	protein_coding	II	3296908	BTB (Broad/complex/Tramtrack/Bric a brac) domain protein	191.238	1.52944	0.170946	3.20208	0.00136441	0.0281814
WBGene00014008	ZK596.3	protein_coding	IV	10902083		18.2649	-2.29265	0.408399	-3.20094	0.00136978	0.0282558
WBGene00009857	clec-28	protein_coding	V	16865741	C-type LECtin	9.2827	2.51015	0.495484	3.19666	0.00139029	0.0286417
WBGene00020329	bath-26	protein_coding	II	1599462	BTB and MATH domain containing	112.975	1.59496	0.193365	3.19247	0.0014106	0.0290227
WBGene00010745	dod-17	protein_coding	IV	12976293	Downstream Of DAF-16 (regulated by DAF-16)	260.781	1.44494	0.143448	3.18763	0.00143446	0.0294757
WBGene00000726	col-153	protein_coding	V	10949898	COLlagen	141.945	-1.46756	0.149704	-3.18226	0.00146132	0.029989
WBGene00008644	F10C2.3	protein_coding	V	12021193		613.459	1.53549	0.174998	3.1793	0.00147631	0.0302578
WBGene00021627	Y47D7A.15	protein_coding	V	4431686		11.5898	2.59279	0.537196	3.17861	0.00147981	0.0302906
WBGene00000649	col-73	protein_coding	II	4872098	COLlagen	101.087	-1.95643	0.313832	-3.17256	0.00151102	0.0308898
WBGene00018256	cutl-28	protein_coding	IV	684497	CUTiclin-Like	18.7741	-2.32503	0.421931	-3.17088	0.00151976	0.0310288
WBGene00086554	D1081.12	protein_coding	I	8474082		10.9803	2.64475	0.572821	3.16528	0.00154935	0.0315924
WBGene00007793	C28D4.5	protein_coding	IV	9745555		28.0397	2.3699	0.477205	3.16442	0.00155391	0.031645
WBGene00015601	fbxa-166	protein_coding	II	1616912	F-box A protein	65.4008	1.76818	0.256352	3.15671	0.00159562	0.0324532
WBGene00011508	T05H10.3	protein_coding	II	8049049		14.223	2.83207	0.605154	3.15402	0.00161036	0.0327113
WBGene00017071	aagr-1	protein_coding	IV	8366539	Acid Alpha Glucosidase Relate	1171.78	1.24246	0.0780888	3.15033	0.00163089	0.0330861
WBGene00000190	arf-1.1	protein_coding	IV	7634832	ADP-ribosylation factor 1-like 1	152.473	1.54403	0.179294	3.14954	0.00163529	0.0331333
WBGene00006679	twk-26	protein_coding	X	3050365	TWiK family of potassium channels	117.776	1.52124	0.170575	3.14881	0.00163939	0.0331743
WBGene00015689	spch-2	protein_coding	I	6274575	SPerm CHromatin enriched	22.5712	2.49215	0.553671	3.14778	0.00164516	0.0332488
WBGene00022337	Y82E9BR.4	protein_coding	III	1398172		103.582	1.61695	0.204217	3.14125	0.00168227	0.0339558
WBGene00021768	Y51F10.7	protein_coding	I	1911678		6412.02	1.28365	0.0920522	3.13594	0.00171302	0.034533
WBGene00009471	F36D3.5	protein_coding	V	16510369		13.6297	2.12132	0.59505	3.13352	0.00172723	0.0347755
WBGene00017591	F19C7.1	protein_coding	IV	4605786		5025.25	1.31134	0.10141	3.13047	0.00174529	0.0350948
WBGene00016265	nmur-4	protein_coding	I	6989067	NMUR (NeuroMedin U Receptor) homolog	497.091	1.38249	0.125343	3.13001	0.001748	0.0351051
WBGene00018210	F39G3.5	protein_coding	V	4722620		372.621	1.43237	0.142122	3.12731	0.00176415	0.0353848
WBGene00009805	F47B8.4	protein_coding	V	14323532		86.3962	1.881	0.305577	3.11917	0.00181363	0.0363318
WBGene00008794	F14D7.7	protein_coding	V	14306504		24.974	2.1281	0.392772	3.11833	0.00181882	0.03639
WBGene00022859	ZK1193.3	protein_coding	X	417482		100.072	1.71313	0.240148	3.11408	0.0018452	0.0368717
WBGene00013999	ZK550.5	protein_coding	IV	17257511		37.8791	2.18689	0.423684	3.11116	0.00186353	0.0371914
WBGene00009185	F27C8.5	protein_coding	IV	9589792		26.3989	2.47327	0.508254	3.1103	0.00186894	0.0372529
WBGene00022858	ZK1193.2	protein_coding	X	406452		442.179	1.31585	0.1036	3.1099	0.00187149	0.0372571
WBGene00017364	clec-7	protein_coding	V	7328397	C-type LECtin	136.626	1.56424	0.188118	3.10739	0.00188746	0.0374927
WBGene00022848	ZK1055.7	protein_coding	V	6602737		1960.01	1.27517	0.0901621	3.1073	0.00188802	0.0374927
WBGene00016196	C28H8.5	protein_coding	III	5884307		5.87477	-3.11998	0.60527	-3.1058	0.00189767	0.0376374
WBGene00044349	Y71G12B.32	protein_coding	I	1813909		44.0464	1.95316	0.33008	3.10484	0.00190383	0.0377129
WBGene00044207	Y6G8.5	protein_coding	V	17614694		25.405	2.09245	0.378805	3.10134	0.00192648	0.0381141
WBGene00012027	fbxa-127	protein_coding	V	16728731	F-box A protein	75.1115	1.6019	0.202733	3.08812	0.00201427	0.0398017
WBGene00010123	F55G11.2	protein_coding	IV	12967448		149.903	1.74839	0.257459	3.0877	0.00201709	0.0398082
WBGene00016282	C31B8.7	protein_coding	V	2900448		103.447	1.62931	0.21261	3.08636	0.00202625	0.0399396
WBGene00015713	C12D12.1	protein_coding	X	3499253		3122.16	1.33782	0.111961	3.08416	0.0020413	0.0401372
WBGene00019858	R03H10.6	protein_coding	II	4171294		55.9614	1.83916	0.289896	3.08426	0.00204058	0.0401372
WBGene00015217	tes-1	protein_coding	IV	7449073	TEStin (human testis-derived transcript) homolog	943.824	1.2946	0.097448	3.08193	0.00205661	0.0403886
WBGene00000711	col-138	protein_coding	IV	17182800	COLlagen	22.9791	2.22088	0.432896	3.07944	0.00207388	0.0406776
WBGene00009031	F21H7.5	protein_coding	V	16237539	Major sperm protein	98.361	1.78086	0.270534	3.07599	0.00209803	0.0411007
WBGene00007448	C08F8.6	protein_coding	IV	11162786		20.3558	2.43678	0.552058	3.07176	0.002128	0.0416369
WBGene00007307	spch-1	protein_coding	IV	10110347	SPerm CHromatin enriched	83.4792	1.94808	0.337683	3.07045	0.00213738	0.0417692
WBGene00008596	clec-54	protein_coding	V	14476911	C-type LECtin	256.465	1.3948	0.131789	3.06972	0.00214259	0.0418199
WBGene00005703	sru-40	protein_coding	V	9832431	Serpentine Receptor, class U	10.6396	2.47593	0.521007	3.05997	0.00221356	0.0431254
WBGene00021322	Y34B4A.6	protein_coding	X	5253001		6199.45	1.29963	0.0998662	3.0598	0.00221488	0.0431254
WBGene00004904	snf-5	protein_coding	II	12861948	Transporter	70.2254	1.91368	0.325023	3.04796	0.00230398	0.0448056
WBGene00019166	tat-2	protein_coding	IV	4827854	Phospholipid-transporting ATPase	724.56	1.35302	0.118875	3.04477	0.0023286	0.0451742
WBGene00044273	nspa-6	protein_coding	V	14889407	Nematode Specific Peptide family, group A	30.3406	1.96699	0.578314	3.04481	0.00232827	0.0451742
WBGene00004212	ptl-1	protein_coding	III	763810	Microtubule-associated protein	288.126	-1.33565	0.112041	-3.03596	0.00239772	0.0464587
WBGene00001464	flp-21	protein_coding	V	7793365	FMRF-Like Peptide	55.0564	-1.80427	0.280826	-3.0289	0.00245449	0.047501
WBGene00019115	nhr-195	protein_coding	V	8970744	Nuclear Hormone Receptor family	133.55	1.49137	0.168174	3.0244	0.00249125	0.048154
WBGene00007210	agmo-1	protein_coding	III	12793384	Alkylglycerol monooxygenase homolog	24.3361	-2.05507	0.355355	-3.0233	0.00250038	0.0482721
WBGene00044620	bus-4	protein_coding	IV	4688267		15.5991	-2.37091	0.452859	-3.02274	0.00250498	0.0483025
WBGene00021178	Y9C9A.8	protein_coding	IV	4930365		164.855	1.51805	0.177695	3.02081	0.00252099	0.0485527
WBGene00015572	C07G1.6	protein_coding	IV	8209157		18.3814	1.966	0.585381	3.01726	0.00255067	0.0490651
WBGene00003089	ltd-1	protein_coding	II	8088494	Lim and Transglutaminase Domain	187.526	-1.40142	0.135642	-3.01621	0.00255953	0.0491762
WBGene00000739	col-166	protein_coding	X	6279832	COLlagen	1644.03	-1.37894	0.128796	-3.01456	0.00257354	0.0493266
WBGene00008493	F01D5.2	protein_coding	II	13998497		94.9463	1.7255	0.255014	3.01474	0.00257197	0.0493266
WBGene00015829	math-15	protein_coding	II	1866386	MATH (meprin-associated Traf homology) domain containing	28.5867	2.02175	0.366464	3.01248	0.00259123	0.0496063
WBGene00004988	spp-3	protein_coding	X	7314883	SaPosin-like Protein family	4941.2	1.40206	0.137366	3.00841	0.00262616	0.0501906
WBGene00009877	F49C12.7	protein_coding	IV	9309108		622.527	1.44852	0.153723	3.00819	0.00262805	0.0501906
WBGene00050939	C05G5.7	protein_coding	X	14743670		5.04011	-3.30963	0.62897	-3.0058	0.00264887	0.0505279
WBGene00007903	lgc-21	protein_coding	X	14064315	Ligand-Gated ion Channel	23.3744	-2.11921	0.387147	-3.0027	0.002676	0.0509332
WBGene00011831	T19B10.2	protein_coding	V	11221302		599.609	-1.39967	0.136971	-3.00264	0.0026765	0.0509332
WBGene00000667	col-92	protein_coding	III	10982166	COLlagen	660.622	1.58322	0.203074	3.00059	0.00269461	0.0512169
WBGene00011222	R10H10.3	protein_coding	IV	10388493		2555.98	1.29125	0.0990958	2.99774	0.00271993	0.0516367
WBGene00011120	R07E5.15	protein_coding	III	4401458		28.9368	2.22585	0.46332	2.99623	0.00273344	0.0518315
WBGene00018342	F42A10.6	protein_coding	III	6176147		1292.14	1.38126	0.131021	2.98693	0.00281795	0.0533706
WBGene00021336	Y34F4.1	protein_coding	III	1020970		289.48	1.49095	0.17058	2.98317	0.0028528	0.0539666
WBGene00011795	T16A9.5	protein_coding	V	14213591		65.852	1.96093	0.355372	2.98064	0.00287645	0.0543495
WBGene00007320	C05B5.2	protein_coding	III	9999819		62.0168	2.01839	0.379453	2.98017	0.00288085	0.0543685
WBGene00001553	gcy-33	protein_coding	V	11995868	Soluble guanylate cyclase gcy-33	17.1362	-2.26952	0.466814	-2.97832	0.00289836	0.0545698
WBGene00010486	K01H12.4	protein_coding	IV	9713220		27.747	2.23409	0.464031	2.97854	0.0028963	0.0545698
WBGene00000663	col-88	protein_coding	III	41061	COLlagen	5.33254	2.65161	0.616334	2.97078	0.00297044	0.0558611
WBGene00016399	C34D4.3	protein_coding	IV	7153662		30.6822	2.08968	0.403763	2.96999	0.00297809	0.0559391
WBGene00003168	mec-4	protein_coding	X	16803368	Degenerin mec-4	49.9157	-1.71918	0.245647	-2.96342	0.00304236	0.0570792
WBGene00006048	ssp-31	protein_coding	I	13219086	Sperm-specific class P protein 31	13.7026	2.46899	0.535962	2.95853	0.00309112	0.0579259
WBGene00006559	tbx-40	protein_coding	IV	15326939	Putative T-box protein 40	4.1389	-2.3922	0.622879	-2.95087	0.00316881	0.0593121
WBGene00007159	B0379.7	protein_coding	I	10072582		46.4748	2.05843	0.400194	2.94942	0.00318376	0.0595221
WBGene00011019	R05A10.2	protein_coding	IV	14177225		72.4736	-1.62633	0.218367	-2.94845	0.00319368	0.0596378
WBGene00003838	ocr-1	protein_coding	V	10764366	Osm-9 and Capsaicin receptor-Related	39.1128	-1.21772	0.628473	-2.94733	0.0032053	0.0597848
WBGene00011926	sptf-2	protein_coding	II	8625728	SP (Specificity Protein) Transcription Factor	41.2729	1.7527	0.269626	2.94438	0.00323606	0.0602881
WBGene00019154	glf-1	protein_coding	IV	5885835	GaLactoFuranose synthesis (UGM, UDP-galactopyranose mutase)	75.9428	-2.57479	0.551323	-2.94069	0.00327483	0.0609393
WBGene00044630	bus-17	protein_coding	X	15757868		22.3602	-2.07808	0.38064	-2.92895	0.00340109	0.0632152
WBGene00015268	BE0003N10.3	protein_coding	III	1046248		36.283	-1.86397	0.305886	-2.92476	0.00344722	0.0639822
WBGene00015627	C09B9.2	protein_coding	IV	5029266		25.8583	2.44306	0.530064	2.92448	0.00345038	0.0639822
WBGene00011336	ubxn-5	protein_coding	II	10233834	UBX-containing protein in Nematodes	23.9754	2.26165	0.492667	2.92152	0.00348331	0.0645181
WBGene00020379	T09B4.5	protein_coding	I	6154075		196.239	-1.57478	0.204243	-2.91668	0.00353782	0.0654517
WBGene00009259	hpo-34	protein_coding	X	11511556		11705.8	1.23933	0.0835229	2.91497	0.00355722	0.0657344
WBGene00015768	C14C11.4	protein_coding	V	5647564		177.258	1.44945	0.159342	2.91302	0.00357949	0.0660695
WBGene00014007	ZK596.2	protein_coding	IV	10908131		15.7223	2.5296	0.547476	2.90838	0.0036331	0.0669815
WBGene00020611	T20D4.5	protein_coding	V	3413344		38.2793	-1.84437	0.302295	-2.90075	0.00372273	0.068555
WBGene00009318	F32B4.8	protein_coding	I	11501625		15.2013	-2.36989	0.495239	-2.90021	0.00372907	0.0685926
WBGene00011918	T22C1.8	protein_coding	I	7955978	Protein-tyrosine-phosphatase	25.2005	2.23118	0.481451	2.8963	0.00377593	0.0693746
WBGene00014666	C05D12.3	protein_coding	II	11424830		2144.29	1.21154	0.0743285	2.88955	0.00385789	0.0707989
WBGene00008228	C50B8.6	protein_coding	V	13578970		449.88	1.35287	0.125468	2.88826	0.00387376	0.0708459
WBGene00019184	H10E21.4	protein_coding	III	17316		25.7861	-2.22299	0.430624	-2.88862	0.00386935	0.0708459
WBGene00019579	oac-57	protein_coding	IV	12304462	O-ACyltransferase homolog	208.049	1.55833	0.20233	2.88862	0.00386935	0.0708459
WBGene00009617	F41E7.1	protein_coding	X	10279599		225.673	1.46701	0.167826	2.88707	0.00388852	0.0709764
WBGene00016525	fbxa-12	protein_coding	III	2219707	F-box A protein	23.1445	2.09427	0.415242	2.88681	0.00389164	0.0709764
WBGene00022142	Y71G12B.2	protein_coding	I	1816150		100.273	1.61165	0.222888	2.8866	0.00389423	0.0709764
WBGene00002193	kin-5	protein_coding	IV	9967078	Tyrosine-protein kinase	17.3016	2.46365	0.544765	2.88568	0.00390563	0.0711029
WBGene00020531	T15B12.2	protein_coding	III	5300042		8.0626	1.98293	0.622383	2.88095	0.00396474	0.0720968
WBGene00015865	C16E9.1	protein_coding	X	6940479		77.274	-1.56354	0.196825	-2.87925	0.00398621	0.0724049
WBGene00009941	F52F12.8	protein_coding	I	9923636	Major sperm protein	6.03717	2.02792	0.624928	2.87871	0.00399305	0.0724466
WBGene00002181	kal-1	protein_coding	I	14128611	human KALlmann syndrome homolog	173.182	-1.52638	0.189623	-2.87182	0.00408119	0.0739617
WBGene00022090	Y69A2AR.19	protein_coding	IV	2488820		55.7471	2.04169	0.412362	2.86993	0.00410565	0.0743206
WBGene00010574	K04H4.5	protein_coding	III	9360269		36.0146	2.10125	0.436515	2.85389	0.0043188	0.0780905
WBGene00019580	oac-58	protein_coding	IV	12308293	O-ACyltransferase homolog	59.0169	1.83324	0.314895	2.84317	0.00446673	0.0806739
WBGene00010679	K08F4.5	protein_coding	IV	10134932		11.3173	2.32141	0.579284	2.84256	0.0044753	0.0807374
WBGene00007725	C25F9.5	protein_coding	V	19407720		567.092	1.33657	0.121764	2.83878	0.00452866	0.0815513
WBGene00008519	cyp-13B1	protein_coding	X	13406675	Putative cytochrome P450 cyp-13B1	26.6796	-1.96296	0.344308	-2.83864	0.00453063	0.0815513
WBGene00003968	peb-1	protein_coding	X	2215630	Pharyngeal Enhancer Binding	166.1	-1.4987	0.183905	-2.83779	0.00454264	0.0816755
WBGene00021381	Y37E11B.10	protein_coding	IV	3603549		49.8833	1.97867	0.384815	2.83683	0.00455644	0.0818315
WBGene00016719	math-24	protein_coding	II	1900238	MATH (meprin-associated Traf homology) domain containing	259.714	1.43885	0.160473	2.83423	0.00459363	0.0824066
WBGene00000685	col-111	protein_coding	IV	4655792	COLlagen	57.8976	-1.69597	0.259247	-2.82976	0.0046583	0.083415
WBGene00007274	C03C11.1	protein_coding	I	10014731		14.6336	2.4562	0.551149	2.82914	0.00466732	0.083415
WBGene00011952	T23F6.5	protein_coding	IV	12735234		6.75771	-2.81647	0.57587	-2.82891	0.00467074	0.083415
WBGene00012637	Y38H8A.3	protein_coding	IV	13472506		47.2685	2.10017	0.452852	2.82905	0.00466859	0.083415
WBGene00017955	F31E8.5	protein_coding	II	6805065		23.1209	2.26019	0.513052	2.82681	0.00470137	0.0838683
WBGene00009331	F32D8.7	protein_coding	V	10898466		19.0181	-2.06585	0.382754	-2.8243	0.00473838	0.0844341
WBGene00012628	Y38H6C.16	protein_coding	V	20536485		35.0172	-1.79772	0.289499	-2.8234	0.00475167	0.0845766
WBGene00016526	fbxa-8	protein_coding	III	2217204	F-box A protein	12.2141	2.27574	0.493698	2.82292	0.00475878	0.0846087
WBGene00007717	C25D7.5	protein_coding	V	15053765		241.1	1.4627	0.170867	2.82159	0.00477865	0.0848146
WBGene00022324	fbxa-26	protein_coding	III	1340616	F-box A protein	135.988	1.47354	0.174348	2.82143	0.00478098	0.0848146
WBGene00019410	K05F1.9	protein_coding	II	5799743	Major sperm protein	35.252	2.13299	0.465351	2.81579	0.0048658	0.0862234
WBGene00010328	F59C6.11	protein_coding	I	10532667		208.605	1.39119	0.143334	2.81431	0.00488819	0.0865242
WBGene00011955	cdka-1	protein_coding	III	4658739	Cyclin-dependent kinase 5 activator 1	161.129	-1.38326	0.138697	-2.81308	0.00490702	0.0867613
WBGene00016896	nep-4	protein_coding	X	6860946	NEPrilysin metallopeptidase family	83.9995	1.64279	0.240927	2.80932	0.00496462	0.0876826
WBGene00010651	K08C9.2	protein_coding	I	11486896		33.1165	2.09252	0.443042	2.80609	0.00501473	0.0883722
WBGene00015110	B0281.3	protein_coding	II	2307041		364.717	1.36168	0.132632	2.80619	0.00501305	0.0883722
WBGene00014116	ZK858.2	protein_coding	I	9123178		60.3268	1.93264	0.372768	2.80543	0.00502495	0.0884546
WBGene00003888	osm-8	protein_coding	II	7604193	Osmotic avoidance abnormal protein 8	10.0175	-2.45344	0.494516	-2.79519	0.00518699	0.0911061
WBGene00020280	T06A1.5	protein_coding	V	1927223		342.555	1.32156	0.11794	2.7952	0.0051868	0.0911061
WBGene00007973	C36B1.6	protein_coding	I	8732246		203.997	1.42348	0.157634	2.78305	0.00538507	0.0944268
WBGene00020522	T15B7.10	protein_coding	V	6810421		18.1709	2.16223	0.458294	2.78262	0.00539225	0.0944268
WBGene00044043	Y46G5A.38	protein_coding	II	12827052		4.01963	-3.08021	0.625626	-2.78252	0.00539379	0.0944268
WBGene00010157	oac-34	protein_coding	I	11342087	O-ACyltransferase homolog	10.5007	-2.39501	0.49634	-2.77895	0.00545353	0.0953681
WBGene00014189	nhr-245	protein_coding	I	11477822	Nuclear Hormone Receptor family	29.4772	-2.03408	0.386427	-2.77826	0.00546506	0.0954651
WBGene00021496	Y40C5A.3	protein_coding	IV	7333638		5.28379	-2.60498	0.608203	-2.77097	0.005589	0.0975235
WBGene00007792	C28D4.4	protein_coding	IV	9743762		7.33124	1.94158	0.624745	2.76685	0.00566007	0.0986557
WBGene00011335	T01E8.8	protein_coding	II	10231309		372.83	1.29019	0.107626	2.76218	0.00574161	0.0999096
WBGene00015135	cyp-23A1	protein_coding	II	4512211	CYtochrome P450 family	9.43271	-2.47754	0.538772	-2.76202	0.00574452	0.0999096
WBGene00020364	T08E11.8	protein_coding	II	1833627		13.1225	2.14168	0.448914	2.76115	0.00575987	0.100067
WBGene00195176	Y43F8B.24	protein_coding	V	19457562		204.707	1.47625	0.180211	2.75276	0.00590945	0.102555
WBGene00020661	smz-2	protein_coding	I	6872597	Sperm Meiosis PDZ domain containing proteins	49.948	1.86413	0.346217	2.75005	0.00595864	0.103296
WBGene00004924	snt-4	protein_coding	I	6436098	SyNapTotagmin	389.746	-1.30964	0.115155	-2.74823	0.00599176	0.103757
WBGene00011869	dod-6	protein_coding	III	10197716	Downstream Of DAF-16 (regulated by DAF-16)	286.341	1.47001	0.178784	2.74494	0.00605218	0.104529
WBGene00015997	C18H7.7	protein_coding	IV	595722		5.62622	1.96425	0.633833	2.74522	0.00604707	0.104529
WBGene00016462	C35E7.10	protein_coding	I	10810648	Tyrosine-protein kinase	20.3904	2.23531	0.526166	2.74474	0.00605592	0.104529
WBGene00007928	C34C12.9	protein_coding	III	3474255		138.035	1.40026	0.15118	2.73755	0.00618985	0.106725
WBGene00009581	F40F9.3	protein_coding	V	9715219		19.8248	2.22746	0.518275	2.73609	0.00621731	0.106995
WBGene00011321	fil-1	protein_coding	V	14993909	Fasting Induced Lipase	107.966	1.55168	0.212176	2.73585	0.00622201	0.106995
WBGene00013968	ZK287.9	protein_coding	V	9679403		213.529	1.47949	0.182594	2.73565	0.00622563	0.106995
WBGene00013091	Y51B9A.9	protein_coding	II	9395493		113.005	1.60461	0.233157	2.73369	0.00626281	0.107518
WBGene00021020	W04B5.3	protein_coding	III	2418345	Galectin	2630.66	1.28367	0.106372	2.73057	0.0063224	0.108425
WBGene00009600	F40G12.5	protein_coding	V	14269180		10.4031	-1.75309	0.58018	-2.72826	0.00636694	0.109071
WBGene00012399	Y6E2A.5	protein_coding	V	15716419		58.8183	1.57642	0.22266	2.71965	0.00653507	0.111832
WBGene00007829	oac-5	protein_coding	V	16292709	O-ACyltransferase homolog	21.248	1.90643	0.35913	2.71907	0.00654665	0.11191
WBGene00008542	scav-6	protein_coding	I	7354491	SCAVenger receptor (CD36 family) related	514.815	1.31024	0.117197	2.71674	0.00659283	0.112458
WBGene00010083	F55B11.1	protein_coding	IV	14401112		652.745	1.2064	0.0772406	2.71675	0.00659265	0.112458
WBGene00009938	F52F12.5	protein_coding	I	9921211		19.264	2.19715	0.512048	2.71358	0.0066561	0.113194
WBGene00011672	cyp-13A5	protein_coding	II	9798276	Putative cytochrome P450 CYP13A5	1811.76	1.33534	0.1272	2.71352	0.00665722	0.113194
WBGene00044807	T19H5.6	protein_coding	II	9469026		26.9799	1.79163	0.310491	2.71365	0.00665473	0.113194
WBGene00008724	F13A7.1	protein_coding	V	16376239	Major sperm protein	36.2828	2.06861	0.459417	2.71283	0.00667104	0.113308
WBGene00000752	col-179	protein_coding	X	11201523	COLlagen	4223.89	1.30072	0.113843	2.70919	0.00674474	0.114438
WBGene00000631	col-54	protein_coding	I	5842714	COLlagen	8.61828	-2.56659	0.547747	-2.70859	0.00675688	0.114523
WBGene00011132	R08A2.1	protein_coding	V	14718543		14.0726	2.19734	0.579389	2.70598	0.00681031	0.115306
WBGene00016288	C31H1.5	protein_coding	IV	5794932		23.6707	2.21111	0.533167	2.70089	0.00691537	0.116961
WBGene00015182	B0416.7	protein_coding	X	9296945		65.0801	1.67875	0.269382	2.69861	0.006963	0.117641
WBGene00003446	msp-53	protein_coding	IV	5064641	Major sperm protein 19/31/40/45/50/51/53/59/61/65/81/113/142	62.3563	1.86814	0.359731	2.69587	0.00702058	0.118489
WBGene00011964	saeg-2	protein_coding	III	9240369	Suppressor of Activated EGL-4	406.975	1.28148	0.10695	2.69471	0.00704508	0.118777
WBGene00022843	ZK1055.2	protein_coding	V	6590583		9.43779	2.27434	0.552554	2.68927	0.00716094	0.120603
WBGene00021996	Y59E9AL.6	protein_coding	IV	5224896		37.769	2.02279	0.43763	2.68742	0.00720072	0.121145
WBGene00010706	cyp-14A2	protein_coding	X	13267605	CYtochrome P450 family	57.7425	-1.80766	0.329396	-2.68356	0.0072843	0.122294
WBGene00016523	C39B5.5	protein_coding	III	2208270	Cystatin	35.7171	1.8156	0.326764	2.68363	0.00728283	0.122294
WBGene00013762	Y113G7B.12	protein_coding	V	20208684		360.181	1.26703	0.10192	2.67948	0.00737374	0.123665
WBGene00020394	T10B5.8	protein_coding	V	1842045		99.3301	-1.69992	0.302214	-2.67084	0.00756614	0.126759
WBGene00009708	F44G3.7	protein_coding	V	16133888		19.0745	2.17983	0.518019	2.66891	0.0076097	0.127355
WBGene00020455	fbxa-59	protein_coding	III	940879	F-box A protein	515.766	1.38265	0.149214	2.65889	0.00783985	0.131069
WBGene00007610	C15H7.3	protein_coding	III	9650421	Putative tyrosine-protein phosphatase C15H7.3	14.9728	2.30592	0.556729	2.65836	0.0078523	0.13114
WBGene00014184	ZK1025.4	protein_coding	I	11456483		3.84371	-3.00211	0.633839	-2.65781	0.00786508	0.131216
WBGene00045417	Y37H2A.13	protein_coding	V	18142849		49.7389	1.75986	0.307437	2.65158	0.0080117	0.133523
WBGene00003623	nhr-25	protein_coding	X	13008493	Nuclear hormone receptor family member nhr-25	76.9214	-1.55878	0.213918	-2.65044	0.00803864	0.133832
WBGene00007672	fbxa-136	protein_coding	V	17521037	F-box A protein	19.4648	2.02746	0.435774	2.64922	0.00806779	0.134177
WBGene00009785	F46C5.10	protein_coding	II	8817594		277.032	1.34307	0.133581	2.64736	0.00811225	0.134776
WBGene00006416	sams-5	protein_coding	IV	6277435	Probable S-adenosylmethionine synthase 5	44.0361	1.93733	0.400128	2.64574	0.00815135	0.135005
WBGene00012757	Y41C4A.11	protein_coding	III	11719900		225.507	1.42406	0.167471	2.64575	0.00815103	0.135005
WBGene00015019	B0205.4	protein_coding	I	10741369		8.6872	-2.43655	0.560296	-2.64578	0.00815035	0.135005
WBGene00011677	cyp-13A1	protein_coding	II	9779182	Putative cytochrome P450 CYP13A1	66.1601	1.65429	0.263281	2.64518	0.00816479	0.135087
WBGene00018976	daam-1	protein_coding	V	64564	DAAM (Disheveled-Associated Activator of Morphogenesis) homolog	48.9962	-1.73988	0.297618	-2.64424	0.00818742	0.135321
WBGene00016436	C35B1.7	protein_coding	IV	4109065		35.1403	-1.7419	0.283975	-2.63902	0.00831463	0.137282
WBGene00019411	K05F1.10	protein_coding	II	5804717		279.573	1.35749	0.140103	2.63779	0.00834483	0.137638
WBGene00044388	C27D6.11	protein_coding	II	5159716		12.1101	2.1327	0.580547	2.63652	0.0083761	0.138011
WBGene00009395	clec-64	protein_coding	II	12898290	C-type LECtin	9.04346	2.2562	0.546041	2.63459	0.00842399	0.138657
WBGene00022504	mam-1	protein_coding	X	882967	MAM (Meprin, A5-protein, PTPmu) domain protein	11.0112	-2.32492	0.528801	-2.63213	0.00848502	0.139518
WBGene00003482	mua-3	protein_coding	III	10160690	Transmembrane cell adhesion receptor mua-3	837.227	-1.29399	0.114835	-2.62843	0.00857798	0.140468
WBGene00015679	C10F3.7	protein_coding	V	5985440		4.3641	2.57244	0.63654	2.62912	0.0085606	0.140468
WBGene00020849	nhr-225	protein_coding	V	2288328	Nuclear Hormone Receptor family	66.3177	1.58973	0.237706	2.62855	0.00857508	0.140468
WBGene00021895	clec-84	protein_coding	IV	2842474	C-type LECtin	631.007	1.2359	0.0916803	2.62854	0.00857524	0.140468
WBGene00023416	spi-1	protein_coding	II	7496247	Serine protease inhibitor 1 protein	22.2699	-1.9072	0.354257	-2.62775	0.00859521	0.140606
WBGene00017361	F10E9.12	protein_coding	III	8324685		1246.58	1.24521	0.0954766	2.62559	0.00864988	0.141355
WBGene00006404	tag-10	protein_coding	II	13632655	P52CeGA	1027.4	1.4653	0.185634	2.62257	0.00872695	0.142469
WBGene00015645	lips-7	protein_coding	II	553095	LIPaSe related	6.24244	-2.66725	0.579317	-2.6212	0.00876215	0.142897
WBGene00019732	M02D8.6	protein_coding	X	8731274		237.889	1.50625	0.204708	2.61595	0.00889784	0.144962
WBGene00002021	hsp-17	protein_coding	V	8384774	Heat Shock Protein	1177.35	1.36415	0.144017	2.61488	0.00892579	0.145269
WBGene00043743	Y59E9AL.2	protein_coding	IV	5226891		140.062	1.84903	0.610807	2.61352	0.00896139	0.1457
WBGene00010528	K03D3.2	protein_coding	IV	16328135		6.48507	-2.62638	0.589176	-2.61038	0.00904427	0.146898
WBGene00016161	C27D6.3	protein_coding	II	5173723		20.7298	2.13431	0.523152	2.60824	0.00910079	0.147666
WBGene00000650	col-74	protein_coding	II	5830869	COLlagen	10.8969	2.36011	0.586763	2.60707	0.0091321	0.148024
WBGene00012280	W05E10.1	protein_coding	V	11689422		214.947	1.34606	0.137661	2.59665	0.00941369	0.152433
WBGene00016786	cyp-35A4	protein_coding	V	4031627	CYtochrome P450 family	348.581	1.31339	0.124281	2.59575	0.00943858	0.152681
WBGene00019908	R05H11.2	protein_coding	III	6798299		17.4094	-2.08678	0.432573	-2.59317	0.00950945	0.153672
WBGene00010114	F55D12.6	protein_coding	I	7901951		9.69412	1.74919	0.623616	2.58866	0.00963491	0.155542
WBGene00007987	C36H8.1	protein_coding	IV	12743039	Major sperm protein	24.5118	2.1732	0.544635	2.58504	0.00973666	0.156797
WBGene00018755	bcmo-2	protein_coding	II	3908489	Beta-Carotene 15,15'-MonoOxygenase	454.011	1.30451	0.121338	2.58486	0.0097419	0.156797
WBGene00019531	scrm-5	protein_coding	IV	4162517	SCRaMblase (phospholipid scramblase)	14.8866	2.15291	0.526166	2.58485	0.00974212	0.156797
WBGene00001075	dpy-14	protein_coding	I	6843595	DumPY: shorter than wild-type	39.9028	2.11697	0.470415	2.58412	0.00976264	0.156969
WBGene00001459	flp-16	protein_coding	II	13235306	FMRFamide-like neuropeptides 16 AQTFVRF-amide 1 AQTFVRF-amide 2 GQTFVRF-amide	226.379	-1.3767	0.149905	-2.58341	0.00978284	0.157136
WBGene00020610	T20D4.4	protein_coding	V	3415993		17.9837	-2.0273	0.420424	-2.57972	0.00988792	0.158664
WBGene00019215	H20E11.3	protein_coding	IV	6824894		478.89	1.32718	0.131314	2.57345	0.010069	0.161408
WBGene00016845	C50F7.5	protein_coding	IV	7726718		369.13	1.6376	0.267425	2.56897	0.0102002	0.163347
WBGene00012530	Y32F6A.5	protein_coding	V	10446534		3668.07	1.18396	0.0729115	2.56632	0.0102784	0.164434
WBGene00008655	lips-3	protein_coding	III	4616526	LIPaSe related	29.2062	-1.87752	0.362112	-2.56532	0.0103082	0.164745
WBGene00013485	Y69H2.10	protein_coding	V	18670315		40.0816	-1.80072	0.332468	-2.55933	0.0104875	0.167443
WBGene00006955	wrt-9	protein_coding	X	1576635	WaRThog (hedgehog-like family)	13.2705	-2.15267	0.453515	-2.5535	0.0106645	0.170099
WBGene00008150	mam-2	protein_coding	IV	9983290	MAM (Meprin, A5-protein, PTPmu) domain protein	12.2767	-2.22295	0.491303	-2.55155	0.0107245	0.170885
WBGene00015362	fbxa-105	protein_coding	V	7390527	F-box A protein	253.314	1.41461	0.169901	2.54824	0.0108268	0.172344
WBGene00019026	F58A6.9	protein_coding	II	5158593	Major Sperm Protein; Uncharacterized protein	15.897	2.10624	0.515911	2.54697	0.0108662	0.172799
WBGene00012177	decr-1.2	protein_coding	II	8545692	Uncharacterized oxidoreductase W01C9.4	16.6652	2.1157	0.527626	2.54467	0.0109382	0.17377
WBGene00012635	Y38H8A.1	protein_coding	IV	13483546		9.99477	-2.31798	0.526053	-2.53867	0.0111276	0.17656
WBGene00022321	fbxa-25	protein_coding	III	1347734	F-box A protein	19.9704	1.97212	0.439018	2.53841	0.0111359	0.17656
WBGene00010246	F58D5.7	protein_coding	I	12032334		16.4379	2.12019	0.521583	2.53707	0.0111785	0.17706
WBGene00016805	C50D2.1	protein_coding	II	111644		31.4735	-1.91861	0.388991	-2.53622	0.0112057	0.177315
WBGene00011590	bus-19	protein_coding	V	12872053		73.6471	-1.53551	0.221276	-2.53359	0.01129	0.178471
WBGene00022571	ZC239.13	protein_coding	II	3222406		28.6518	1.87929	0.387254	2.53016	0.0114012	0.18005
WBGene00001854	hil-3	protein_coding	X	8159154	Histone H1.3	122.736	-1.41689	0.169426	-2.52902	0.011438	0.1804
WBGene00005073	srb-8	protein_coding	III	7171652	Serpentine receptor class beta-8/9	9.15843	1.24563	0.630864	2.52878	0.0114459	0.1804
WBGene00008336	C55A6.7	protein_coding	V	11519335		195.469	1.40996	0.168876	2.52768	0.0114818	0.180787
WBGene00010870	let-522	protein_coding	I	7172464		571.614	1.2295	0.0929205	2.52545	0.0115549	0.181759
WBGene00004987	spp-2	protein_coding	X	7315995	SaPosin-like Protein family	1342.97	1.3953	0.16329	2.52072	0.0117116	0.184042
WBGene00018336	F42A9.7	protein_coding	IV	8616059	Major sperm protein	16.9416	2.10246	0.532708	2.51946	0.0117536	0.184521
WBGene00044402	Y82E9BL.18	protein_coding	III	1328644		74.2412	1.54021	0.227351	2.51478	0.0119107	0.186804
WBGene00043980	F11D5.7	protein_coding	X	3304026		82.3393	1.57779	0.244919	2.51419	0.0119306	0.186932
WBGene00012761	Y41C4A.18	protein_coding	III	11730707		4.61589	1.79632	0.640158	2.51172	0.0120144	0.18806
WBGene00019785	M70.3	protein_coding	IV	2237663		37.7933	1.90765	0.420304	2.5027	0.0123251	0.192736
WBGene00000228	atn-1	protein_coding	V	12478413	AcTiniN	4044.64	1.13373	0.0542115	2.49927	0.0124449	0.194418
WBGene00015716	sox-4	protein_coding	X	3505440	SOX (mammalian SRY box) family	292.591	1.35022	0.145542	2.49881	0.0124611	0.194481
WBGene00015364	npr-19	protein_coding	X	731160	NeuroPeptide Receptor family	4.24181	-1.88056	0.633344	-2.49661	0.0125387	0.1955
WBGene00003574	ncx-9	protein_coding	V	4991505	Na/Ca eXchangers	17.7664	1.99352	0.457785	2.49557	0.0125755	0.195883
WBGene00018353	fbxa-182	protein_coding	II	2409643	F-box A protein	682.48	1.26322	0.108418	2.49336	0.012654	0.196913
WBGene00007806	clec-230	protein_coding	V	15347847	C-type LECtin	8.51337	-2.48757	0.554116	-2.49174	0.012712	0.197624
WBGene00020613	T20D4.7	protein_coding	V	3408870		102.272	-1.5321	0.227797	-2.49124	0.0127299	0.19771
WBGene00018531	F47B3.7	protein_coding	I	3968164	Protein-tyrosine-phosphatase	27.7607	2.03286	0.519991	2.48654	0.0128992	0.200145
WBGene00005582	sri-70	protein_coding	V	17303054	Serpentine Receptor, class I	10.1711	2.10031	0.604693	2.48492	0.012958	0.200862
WBGene00003570	ncx-5	protein_coding	V	10486473	Na/Ca eXchangers	4.76091	-2.38007	0.605963	-2.48329	0.0130174	0.201586
WBGene00008074	nkb-2	protein_coding	IV	10590932	Na+/K+ ATPase, Beta subunit	16.4725	2.10196	0.548253	2.48077	0.0131097	0.202819
WBGene00000022	abt-4	protein_coding	V	323777	ABC Transporter family	2462.51	1.20094	0.0826587	2.48032	0.0131263	0.202879
WBGene00021997	Y59E9AR.1	protein_coding	IV	5249428	Major sperm protein	227.271	1.94858	0.611193	2.47893	0.0131777	0.203477
WBGene00009023	F21G4.1	protein_coding	X	9889315	Solute carrier organic anion transporter family member	409.032	1.29587	0.123381	2.4736	0.0133759	0.206338
WBGene00014240	htas-1	protein_coding	IV	9682984	Histone H2A	17.2843	2.01657	0.484153	2.47124	0.0134644	0.207503
WBGene00010019	F54B8.4	protein_coding	V	15816464		172.868	1.57382	0.249121	2.46839	0.0135722	0.208963
WBGene00008944	F19B2.5	protein_coding	V	20162648		3404.62	1.27663	0.115597	2.46229	0.0138055	0.212349
WBGene00007156	B0379.2	protein_coding	I	10070923		18.8607	2.05942	0.523257	2.46143	0.0138385	0.212652
WBGene00021862	fbxa-48	protein_coding	III	2266980	F-box A protein	61.7979	1.6202	0.27356	2.45314	0.0141614	0.217405
WBGene00013955	kri-1	protein_coding	I	8226509	human KRIT 1 (Krev interaction trapped/cerebral cavernous malformation 1) homolog	82.9295	1.47148	0.202175	2.45198	0.0142072	0.217899
WBGene00022346	Y82E9BR.13	protein_coding	III	1390452		220.943	1.34695	0.147413	2.44329	0.0145541	0.223005
WBGene00011491	T05F1.5	protein_coding	I	9633179		30.8966	1.97834	0.493283	2.44286	0.0145715	0.223057
WBGene00016429	C35A11.2	protein_coding	V	5386110		11.0089	-2.1402	0.480844	-2.44231	0.0145935	0.22318
WBGene00012603	nspe-6	protein_coding	II	12615897	Nematode Specific Peptide family, group E	6.93501	2.16452	0.562445	2.43794	0.0147711	0.225681
WBGene00010594	swt-5	protein_coding	V	9501399	SWEET sugar transporter family	5.28153	-2.55995	0.60434	-2.43733	0.0147961	0.225846
WBGene00045415	Y43F8B.15	protein_coding	V	19460818		57.5073	1.8012	0.382435	2.43625	0.0148404	0.226305
WBGene00019779	M60.2	protein_coding	X	8242056		1798.41	1.1908	0.0800913	2.42964	0.0151139	0.230257
WBGene00003909	pag-3	protein_coding	X	14951200	Uncharacterized protein; Zinc finger protein PAG-3	19.1648	-1.8756	0.360393	-2.41758	0.0156241	0.237575
WBGene00012173	W01B6.6	protein_coding	IV	10081094		5.23054	1.65439	0.642436	2.41764	0.0156213	0.237575
WBGene00016647	fbxc-4	protein_coding	IV	899543	F-box C protein	818.865	1.30584	0.130875	2.4162	0.0156837	0.238058
WBGene00017175	irld-3	protein_coding	V	3137472	Insulin/EGF-Receptor L Domain protein	7.1471	1.68323	0.631437	2.41615	0.0156856	0.238058
WBGene00012591	nspe-1	protein_coding	II	12620548	Nematode Specific Peptide family, group E	103.782	1.5604	0.248938	2.40833	0.0160259	0.242702
WBGene00015340	C02E7.7	protein_coding	V	4918154		19.7835	-2.10737	0.473047	-2.40859	0.0160144	0.242702
WBGene00045355	D1086.17	protein_coding	V	14067856		36.4846	1.76569	0.354647	2.40807	0.0160372	0.242702
WBGene00006050	ssq-1	protein_coding	IV	9852554	Sperm-Specific family, class Q	185.537	1.58685	0.264093	2.40545	0.0161527	0.244217
WBGene00017429	F13D11.4	protein_coding	X	5831918		163.558	-1.37486	0.16224	-2.40259	0.0162792	0.245898
WBGene00003752	nlp-14	protein_coding	X	8917421	Neuropeptide-Like Protein	244.469	-1.32994	0.14202	-2.40122	0.0163405	0.24659
WBGene00017059	D2062.7	protein_coding	II	2616905		11.7222	2.14189	0.584209	2.40022	0.0163853	0.247033
WBGene00010265	F58G1.3	protein_coding	II	12925979	Serine/threonine-protein phosphatase	19.549	2.05425	0.555763	2.39603	0.0165736	0.249636
WBGene00017636	F20D6.6	protein_coding	V	8159941		21.6655	1.97318	0.491895	2.39436	0.0166494	0.250542
WBGene00021382	Y37F4.1	protein_coding	I	10859547		18.4605	-1.90529	0.395017	-2.39109	0.0167983	0.252544
WBGene00007794	C28D4.7	protein_coding	IV	9741860		22.156	1.98023	0.518451	2.38909	0.0168902	0.253687
WBGene00004335	ref-2	protein_coding	X	7744239	REgulator of Fusion	18.3249	-1.91412	0.387239	-2.38566	0.0170485	0.255823
WBGene00009470	F36D3.4	protein_coding	V	16516475	Major sperm protein	34.1863	1.94622	0.510958	2.38429	0.0171119	0.256534
WBGene00003591	nex-4	protein_coding	V	4855325	anNEXin family	16.4247	-1.99059	0.46251	-2.3839	0.0171302	0.256568
WBGene00206522	F14D2.19	protein_coding	II	3335441		46.9268	-1.75439	0.328857	-2.38241	0.0171999	0.25737
WBGene00011378	T02E1.6	protein_coding	I	8211111		20.4727	1.98589	0.509733	2.38096	0.0172675	0.258139
WBGene00017114	E03H12.7	protein_coding	IV	4987757		13.8405	2.05373	0.552413	2.38053	0.0172879	0.258203
WBGene00006952	wrt-6	protein_coding	X	3480251	Warthog protein 6 Warthog protein 6 N-product Warthog protein 6 C-product	23.6737	-1.83121	0.356212	-2.38006	0.0173098	0.258288
WBGene00010980	R02D5.7	protein_coding	V	14480383		69.1906	1.51924	0.233244	2.3772	0.0174446	0.260057
WBGene00003755	nlp-17	protein_coding	IV	13505267	Neuropeptide-Like Protein	215.669	-1.3592	0.154879	-2.37681	0.0174629	0.260087
WBGene00009883	F49C12.14	protein_coding	IV	9322489		153.233	1.37117	0.162813	2.37434	0.0175802	0.26159
WBGene00009321	F32B6.4	protein_coding	IV	9890491		24.4661	1.96708	0.500134	2.37234	0.0176759	0.262768
WBGene00001554	gcy-34	protein_coding	V	13383019	Soluble guanylate cyclase gcy-34	8.00203	-2.25171	0.557271	-2.37084	0.0177477	0.26359
WBGene00017214	F07E5.9	protein_coding	II	2076156		13.6562	1.97563	0.474792	2.36714	0.0179264	0.265997
WBGene00008801	acp-3	protein_coding	II	8435347	ACid Phosphatase family	9.16978	2.08396	0.567108	2.36039	0.0182558	0.270382
WBGene00013887	nspa-5	protein_coding	V	14878324	Nematode Specific Peptide family, group A	57.9545	1.76408	0.371503	2.3607	0.0182406	0.270382
WBGene00235312	F28A12.10	protein_coding	V	8637245		4.47027	-2.29404	0.620928	-2.35696	0.0184251	0.272637
WBGene00010183	fipr-13	protein_coding	V	10064503	FIP (Fungus-Induced Protein) Related	185.843	1.44462	0.198754	2.35615	0.0184654	0.27298
WBGene00011023	R05A10.6	protein_coding	IV	14165789		5.29072	-2.54881	0.5887	-2.34467	0.0190439	0.281012
WBGene00021215	Y18H1A.11	protein_coding	I	680414		74.4967	1.61023	0.283264	2.34469	0.0190427	0.281012
WBGene00008230	pfk-1.2	protein_coding	V	9531819	ATP-dependent 6-phosphofructokinase 2	16.3265	1.97559	0.516887	2.3429	0.0191345	0.282088
WBGene00011853	clec-40	protein_coding	V	16839145	C-type LECtin	14.2408	1.95436	0.461318	2.34171	0.0191956	0.282728
WBGene00194821	dmsr-16	protein_coding	V	6807831	DroMyoSuppressin Receptor related	15.9884	1.83532	0.387147	2.33674	0.0194528	0.286252
WBGene00000395	cdh-3	protein_coding	III	7741273	Cadherin-3	204.406	-1.37479	0.166527	-2.33194	0.0197037	0.289677
WBGene00015227	B0507.10	protein_coding	V	8758820		63.2791	1.67836	0.319869	2.33031	0.0197898	0.290639
WBGene00044578	K01A12.4	protein_coding	X	8610932		422.595	1.40569	0.183687	2.33001	0.0198055	0.290639
WBGene00022181	pho-9	protein_coding	III	2757168	intestinal acid PHOsphatase	1238.72	1.28601	0.126932	2.32932	0.0198424	0.290912
WBGene00017199	clec-45	protein_coding	V	7638105	C-type LECtin	106.017	1.87206	0.49556	2.32585	0.0200267	0.293345
WBGene00010381	H12D21.5	protein_coding	V	14894053		4.37156	1.63447	0.643387	2.32545	0.0200481	0.29339
WBGene00009463	F36D1.4	protein_coding	I	11271708		5.8461	1.61697	0.641617	2.32448	0.0200997	0.293875
WBGene00011162	chil-19	protein_coding	II	9452701	CHItinase-Like	48.5928	1.60143	0.277679	2.32276	0.0201922	0.294828
WBGene00022162	Y71G12B.27	protein_coding	I	1797435	Cyclin-dependent kinases regulatory subunit	18.6617	1.98475	0.540553	2.32258	0.0202018	0.294828
WBGene00007247	C01G12.7	protein_coding	II	14588621		37.445	-1.64285	0.280396	-2.32044	0.0203172	0.296241
WBGene00010266	dct-18	protein_coding	II	12930617	DAF-16/FOXO Controlled, germline Tumor affecting	3705.55	1.28217	0.125707	2.31904	0.0203931	0.297076
WBGene00012163	VZK822L.2	protein_coding	IV	11912027		49.7508	1.61769	0.290294	2.31759	0.0204715	0.297947
WBGene00007810	C29F7.1	protein_coding	X	13412575		267.845	1.34737	0.156376	2.31553	0.0205837	0.299035
WBGene00020857	srt-62	protein_coding	I	10899110	Serpentine Receptor, class T	3.49056	-1.78065	0.629122	-2.31579	0.0205696	0.299035
WBGene00015956	C18B2.5	protein_coding	X	3606682		2725.8	1.21443	0.0950048	2.31333	0.0207045	0.300516
WBGene00020062	nhr-270	protein_coding	V	802550	Nuclear Hormone Receptor family	9.25696	-2.20201	0.573658	-2.31224	0.0207647	0.301117
WBGene00015082	B0244.7	protein_coding	III	5731501	Putative G-protein coupled receptor B0244.7	36.9968	1.60406	0.282655	2.30979	0.0208998	0.302801
WBGene00020276	T05H4.15	protein_coding	V	6440180		109.008	1.41489	0.189552	2.30872	0.0209589	0.303381
WBGene00011382	dop-5	protein_coding	V	11362456	DOPamine receptor	50.0765	-1.5451	0.245756	-2.30758	0.0210225	0.304026
WBGene00004998	spp-13	protein_coding	X	8417419	SaPosin-like Protein family	13.2677	-1.95839	0.438433	-2.30359	0.0212457	0.306977
WBGene00007778	C27D8.2	protein_coding	IV	12712770		37.8582	1.81824	0.425629	2.29844	0.0215367	0.3109
WBGene00012012	T25B9.6	protein_coding	IV	10758137		18.0888	1.95837	0.54341	2.29661	0.0216409	0.312122
WBGene00010442	bus-12	protein_coding	IV	13256085	JC8.12-like protein; Uncharacterized protein	19.3064	-1.87123	0.407003	-2.29086	0.0219717	0.316607
WBGene00002258	lbp-6	protein_coding	I	6728285	Fatty acid-binding protein homolog 6	7692.35	1.28221	0.127491	2.28921	0.0220672	0.317696
WBGene00013171	Y53F4B.25	protein_coding	II	15136206		5.00726	-2.56549	0.626624	-2.28791	0.0221429	0.318499
WBGene00022611	ZC449.1	protein_coding	X	5024420		8.90382	-2.20671	0.520833	-2.28676	0.0222097	0.319171
WBGene00003889	osm-9	protein_coding	IV	3551090	Olfactory channel; Uncharacterized protein	30.2206	-1.66515	0.299427	-2.28613	0.0222469	0.319419
WBGene00011530	T06D8.10	protein_coding	II	11240923		212.554	1.4196	0.193186	2.28486	0.0223208	0.319905
WBGene00011796	T16G1.2	protein_coding	V	12929487		23.9132	-1.84568	0.393901	-2.28516	0.0223036	0.319905
WBGene00010147	F56D5.2	protein_coding	IV	9396881		8.65298	1.83	0.611248	2.28421	0.0223594	0.320171
WBGene00007457	C08F11.10	protein_coding	IV	13648037		16.6802	1.95483	0.53871	2.27919	0.0226556	0.324121
WBGene00044801	ZC262.9	protein_coding	III	8337504		6.8275	-2.39538	0.577322	-2.27243	0.0230608	0.329624
WBGene00003730	nhx-2	protein_coding	II	7690707	Na(+)/H(+) exchanger protein 2	1304.21	1.23664	0.107276	2.26887	0.0232765	0.332408
WBGene00009397	clec-66	protein_coding	II	12904400	C-type LECtin	1357.81	1.31554	0.14502	2.26229	0.0236795	0.337861
WBGene00009695	F44F1.3	protein_coding	I	13254141		18.4136	1.7776	0.585938	2.25942	0.0238572	0.340093
WBGene00001570	gei-13	protein_coding	III	9632188	Gex-3-interacting protein 13	169.377	-1.34896	0.158802	-2.25536	0.0241109	0.343403
WBGene00010033	F54B11.10	protein_coding	X	13582202		4.19519	-2.5318	0.616043	-2.25304	0.0242567	0.345172
WBGene00006950	wrt-4	protein_coding	X	15752258	Warthog protein 4 Warthog protein 4 N-product Warthog protein 4 C-product	20.191	-1.87166	0.398134	-2.24709	0.0246341	0.35023
WBGene00013723	Y106G6H.13	protein_coding	I	10471214		39.031	1.74402	0.381286	2.24631	0.0246842	0.35063
WBGene00020250	T05C1.3	protein_coding	II	4487694		5.90142	-2.35826	0.596212	-2.24466	0.0247897	0.351816
WBGene00017879	acd-4	protein_coding	V	8638237		17.2843	-1.86315	0.386677	-2.24366	0.0248543	0.352419
WBGene00013457	paqr-3	protein_coding	IV	14379952	Progestin and AdipoQ Receptor family	31.0278	-1.68032	0.323833	-2.24211	0.0249543	0.353523
WBGene00022413	Y102A11A.3	protein_coding	X	2019170		2331.98	1.19962	0.0912937	2.24104	0.0250232	0.354184
WBGene00000596	col-7	protein_coding	I	7401675	Cuticle collagen 7	25.0202	1.96407	0.518671	2.24049	0.0250588	0.35429
WBGene00001707	grh-1	protein_coding	I	1259489	GRainyHead (Drosophila transcription factor) homolog	101.165	-1.50551	0.23843	-2.24024	0.025075	0.35429
WBGene00006954	wrt-8	protein_coding	V	15342085	Warthog protein 8 Warthog protein 8 N-product Warthog protein 8 C-product	7.57675	-2.27869	0.550721	-2.2378	0.0252343	0.356226
WBGene00009722	F45D3.2	protein_coding	V	12541040		66.7757	-1.49941	0.235666	-2.23604	0.0253492	0.357531
WBGene00020576	T19D12.1	protein_coding	II	6666898		1186.08	1.21862	0.100581	2.23301	0.0255482	0.360019
WBGene00018731	F53A9.8	protein_coding	X	8718558		1107.9	1.39246	0.185191	2.23028	0.0257287	0.362243
WBGene00022548	ZC196.4	protein_coding	V	8733106		38.065	1.55595	0.267127	2.22325	0.0261986	0.368535
WBGene00044073	tag-244	protein_coding	IV	1550929		588.914	1.23626	0.109644	2.22247	0.0262513	0.36895
WBGene00013820	Y116F11B.2	protein_coding	V	19797999		5.55889	-2.50487	0.617287	-2.21959	0.0264465	0.371367
WBGene00017267	numr-2	protein_coding	III	7364607	NUclear localized Metal Responsive	3.35119	1.5421	0.64892	2.21378	0.0268437	0.376614
WBGene00012448	cyp-33D3	protein_coding	V	18832327	CYtochrome P450 family	25.0122	1.66745	0.330461	2.20896	0.0271777	0.380965
WBGene00006629	tsp-3	protein_coding	III	13212691	TetraSPanin family	20.1827	1.83946	0.455434	2.20386	0.0275345	0.385628
WBGene00003029	lin-44	protein_coding	I	4126056	Abnormal cell lineage protein 44	59.6703	-1.49232	0.232365	-2.20315	0.0275842	0.385648
WBGene00019545	K09B3.1	protein_coding	IV	3794767		5.22243	-2.2194	0.605836	-2.20344	0.0275635	0.385648
WBGene00006449	alg-4	protein_coding	III	9887211	Putative protein tag-76	55.1065	1.71063	0.404485	2.20148	0.0277022	0.386817
WBGene00014129	ZK892.5	protein_coding	II	10008231		13.592	1.92221	0.5509	2.20128	0.0277163	0.386817
WBGene00007570	C14A6.6	protein_coding	V	18165294		12.1244	1.95239	0.571698	2.19729	0.028	0.390435
WBGene00045401	eol-1	protein_coding	V	13979507	Enhanced Olfactory Learning	51.8889	1.61733	0.311578	2.19191	0.0283863	0.395476
WBGene00010597	K06A4.7	protein_coding	V	9489934		5784.08	1.32825	0.156543	2.19101	0.0284508	0.395676
WBGene00012169	W01B6.2	protein_coding	IV	10073435		29.9138	1.80951	0.453019	2.19068	0.028475	0.395676
WBGene00015521	fipr-16	protein_coding	III	8590833	Fungus-induced-related protein 16	3.34608	1.88037	0.63975	2.19134	0.0284271	0.395676
WBGene00010563	K04G2.4	protein_coding	I	8035886		37.818	1.73713	0.391869	2.19023	0.0285075	0.395783
WBGene00016848	klo-1	protein_coding	IV	7745989	KLOtho (mammalian aging-associated protein) homolog	828.956	1.27829	0.13213	2.18834	0.0286449	0.397345
WBGene00019024	F58A6.5	protein_coding	II	5146968		11.7504	1.9402	0.575183	2.18585	0.0288264	0.399223
WBGene00021495	sqst-2	protein_coding	IV	7327736	SeQueSTosome related	290.785	1.2808	0.133262	2.1858	0.0288303	0.399223
WBGene00008541	F07A5.2	protein_coding	I	7352444		101.603	1.58057	0.296168	2.18471	0.02891	0.39998
WBGene00010940	M163.8	protein_coding	X	14485127		34.7261	1.65478	0.33446	2.1791	0.029324	0.405356
WBGene00023424	C53D6.10	protein_coding	IV	9033588		13.515	1.9139	0.558509	2.17859	0.0293618	0.405529
WBGene00012010	T25B9.4	protein_coding	IV	10755732	Tyrosine-protein kinase	12.5869	1.89873	0.587153	2.17653	0.0295157	0.407301
WBGene00018083	F36A4.4	protein_coding	IV	4267631		12.7469	1.92944	0.571853	2.17602	0.029554	0.407478
WBGene00001711	grl-2	protein_coding	V	12944861	GRound-Like (grd related)	5.11214	-2.29533	0.595262	-2.17424	0.0296871	0.408606
WBGene00001761	gst-13	protein_coding	II	9231497	Glutathione S-Transferase	1031.83	1.24601	0.11688	2.17436	0.0296784	0.408606
WBGene00021878	Y54G2A.13	protein_coding	IV	2814507		17.6647	1.87776	0.555827	2.17288	0.029789	0.409656
WBGene00021519	Y41D4B.17	protein_coding	IV	1560230		111.519	1.42988	0.212126	2.16541	0.0303564	0.4171
WBGene00018253	F40H6.1	protein_coding	III	6057057		10.3969	1.92424	0.552243	2.15792	0.0309344	0.424677
WBGene00044457	C18H7.11	protein_coding	IV	596891		909.5	1.23424	0.11241	2.15591	0.0310908	0.426457
WBGene00017487	F15E6.6	protein_coding	IV	4278871		639.705	1.20948	0.100054	2.15307	0.0313129	0.429134
WBGene00016322	C32E8.4	protein_coding	I	3783835		16.8796	1.88167	0.532302	2.15272	0.0313409	0.42915
WBGene00016761	tkr-2	protein_coding	IV	6202080	TachyKinin Receptor family	12.9192	-1.8952	0.438169	-2.15083	0.0314898	0.43082
WBGene00001450	flp-7	protein_coding	X	5885865	FMRF-Like Peptide	118.645	-1.35055	0.168698	-2.1494	0.0316026	0.431992
WBGene00007996	C38C6.3	protein_coding	II	14633184		3.83313	-2.52931	0.631281	-2.14576	0.0318919	0.435574
WBGene00011665	T09F5.1	protein_coding	V	15149092		11.1977	-1.95024	0.463992	-2.14475	0.0319731	0.43631
WBGene00013135	rga-2	protein_coding	I	11979440	Rho GTPase Activating protein	89.805	-1.43354	0.213939	-2.14265	0.0321411	0.438228
WBGene00003165	mec-1	protein_coding	V	6956537		206.357	-1.40149	0.196012	-2.13956	0.0323905	0.441251
WBGene00008726	F13A7.11	protein_coding	V	16394031		650.527	1.32933	0.161933	2.13641	0.0326459	0.443973
WBGene00016807	C50D2.3	protein_coding	II	106257		5.10113	1.50156	0.641812	2.13675	0.0326181	0.443973
WBGene00006363	syd-1	protein_coding	II	7585731	Rho GTPase-activating protein syd-1	44.3305	-1.5446	0.268246	-2.13528	0.032738	0.444469
WBGene00019980	chil-14	protein_coding	V	1455062	CHItinase-Like	8.03878	1.93498	0.52623	2.1356	0.032712	0.444469
WBGene00017807	F26A1.9	protein_coding	III	4825349		39.3902	1.56093	0.288321	2.12691	0.0334272	0.45344
WBGene00020829	T26C11.3	protein_coding	X	1834445		10.086	1.9187	0.506268	2.12548	0.0335467	0.454675
WBGene00044062	snb-6	protein_coding	II	8859071	SyNaptoBrevin related	5.50829	1.4943	0.643687	2.11392	0.0345224	0.467502
WBGene00018435	btb-9	protein_coding	II	1728569	BTB (Broad/complex/Tramtrack/Bric a brac) domain protein	53.3995	1.47729	0.241734	2.11244	0.0346486	0.468813
WBGene00015034	B0207.11	protein_coding	I	5962952		5.5338	1.49402	0.644508	2.11189	0.0346955	0.468927
WBGene00020039	R12E2.14	protein_coding	I	4149981		13.0136	-1.94	0.454939	-2.11166	0.0347158	0.468927
WBGene00000256	bli-6	protein_coding	IV	6377094	BLIstered cuticle	46.1265	1.62393	0.32645	2.11107	0.0347661	0.4691
WBGene00006747	unc-7	protein_coding	X	15121822	Innexin unc-7	60.0983	-1.49215	0.243542	-2.11083	0.0347874	0.4691
WBGene00009905	clec-240	protein_coding	V	17010062	C-type LECtin	4.63631	1.53233	0.646346	2.10858	0.0349812	0.471317
WBGene00000096	ahr-1	protein_coding	I	9522578	Aryl hydrocarbon receptor protein 1	38.072	-1.53564	0.265031	-2.10717	0.0351025	0.472552
WBGene00044698	K09F5.6	protein_coding	X	7719272		131.313	-1.35457	0.176301	-2.10593	0.0352101	0.473601
WBGene00000771	cpb-2	protein_coding	II	6192833	Cytoplasmic polyadenylation element-binding protein 2	20.4257	1.8149	0.509516	2.09966	0.0357586	0.480573
WBGene00004719	sad-1	protein_coding	X	13487872	Serine/threonine kinase SAD-1	113.101	-1.37951	0.188512	-2.09724	0.0359724	0.48304
WBGene00003879	ora-1	protein_coding	IV	7977836	Onchocerca Related Antigen family	67.5157	-1.63211	0.439111	-2.09323	0.0363286	0.487414
WBGene00044701	AH9.6	protein_coding	X	2263176		38.1952	-1.55604	0.274223	-2.08925	0.0366855	0.491789
WBGene00020905	T28H11.7	protein_coding	IV	5015281		27.1055	1.78285	0.477791	2.08595	0.0369835	0.495333
WBGene00044640	B0432.14	protein_coding	II	264353		79.6923	-1.40756	0.205068	-2.08563	0.0370119	0.495333
WBGene00008201	C49C3.11	protein_coding	IV	17343782		6.98578	1.91942	0.573786	2.08315	0.0372372	0.49793
WBGene00008950	wht-5	protein_coding	IV	12337580	WHiTe (Drosophila) related ABC transporter	18.4322	1.81901	0.550541	2.08091	0.0374418	0.500248
WBGene00009806	F47B8.5	protein_coding	V	14325801		4.38623	-2.37645	0.616114	-2.07998	0.0375274	0.500972
WBGene00018035	sek-4	protein_coding	X	5375070	SAPK/ERK kinase	183.528	1.28985	0.145814	2.07647	0.0378509	0.504868
WBGene00020265	fbxa-196	protein_coding	V	6448661	F-box A protein	7.43523	1.71577	0.616068	2.07526	0.037962	0.505928
WBGene00007232	C01G10.5	protein_coding	V	15089102		27.3305	1.79745	0.521518	2.07287	0.038184	0.508461
WBGene00005012	F26F4.2	protein_coding	III	4911228		30.0822	1.75576	0.442617	2.07184	0.0382803	0.509319
WBGene00006614	trp-1	protein_coding	III	8535131	Transient-receptor-potential-like protein	81.7767	-1.39309	0.195797	-2.06968	0.0384827	0.511586
WBGene00006676	twk-23	protein_coding	X	13817999	TWiK family of potassium channels	11.9416	-1.89304	0.607238	-2.06845	0.0385976	0.512686
WBGene00002186	kel-10	protein_coding	III	10098473	Kelch repeat-containing protein kel-10	43.3298	1.71271	0.415243	2.06735	0.0387008	0.51363
WBGene00010547	K03H1.12	protein_coding	III	9941645		8.35243	1.69701	0.615836	2.06696	0.038738	0.513696
WBGene00008215	C49F8.3	protein_coding	X	13386059		68.1376	-1.51154	0.261132	-2.06616	0.0388136	0.514272
WBGene00019306	K02E7.1	protein_coding	II	1083124		4.0786	-2.23377	0.621679	-2.06519	0.0389047	0.515051
WBGene00016054	C24D10.2	protein_coding	IV	5163339		20.8198	1.79769	0.496696	2.06437	0.0389824	0.515653
WBGene00010290	F58H1.7	protein_coding	V	11963003		170.78	-1.30462	0.15221	-2.06384	0.0390325	0.515888
WBGene00013521	Y73F8A.12	protein_coding	IV	15311184		3.59535	1.47882	0.64854	2.06118	0.0392854	0.518802
WBGene00007714	C25D7.1	protein_coding	V	15036301	Major sperm protein	11.9438	1.85645	0.568331	2.06062	0.0393389	0.519079
WBGene00022876	ZK1248.5	protein_coding	II	5810579		13.2773	1.83947	0.574605	2.05953	0.0394437	0.520032
WBGene00016053	C24D10.1	protein_coding	IV	5166340		13.9187	1.8343	0.547253	2.05837	0.0395544	0.52106
WBGene00016742	C48B6.4	protein_coding	I	6889254		17.8108	1.80598	0.555438	2.05801	0.039589	0.521087
WBGene00008001	C38C10.3	protein_coding	III	9384126		8.90381	1.68048	0.614101	2.0546	0.0399178	0.524981
WBGene00003750	nlp-12	protein_coding	I	1843353	Neuropeptide-Like Protein	229.06	-1.28398	0.142597	-2.05197	0.0401727	0.527423
WBGene00006777	unc-41	protein_coding	V	9966404	Putative stoned B-like protein	93.0014	-1.3633	0.184173	-2.05173	0.0401962	0.527423
WBGene00235315	Y50D4A.10	protein_coding	V	1219936		66.6271	1.46753	0.246933	2.05166	0.0402025	0.527423
WBGene00020640	fbxa-73	protein_coding	III	2253449	F-box A protein	13.9371	1.80203	0.47339	2.05067	0.0402995	0.52826
WBGene00003179	mec-18	protein_coding	X	4271165		175.704	-1.29351	0.145757	-2.04981	0.0403834	0.528926
WBGene00044183	F09C6.13	protein_coding	V	16885075		6.08303	1.91747	0.608438	2.04761	0.0405979	0.5313
WBGene00012242	srt-39	protein_coding	V	12484885	Serpentine Receptor, class T	12.7459	1.77357	0.441023	2.04288	0.0410643	0.536963
WBGene00007335	C05C12.1	protein_coding	IV	11253985		12.119	1.82854	0.583775	2.03849	0.0415012	0.541614
WBGene00010659	K08D8.5	protein_coding	IV	12910645		367.871	1.37072	0.193066	2.03828	0.0415217	0.541614
WBGene00077548	F21C3.7	protein_coding	I	7278802		5.21753	1.73165	0.627444	2.0385	0.0415004	0.541614
WBGene00011182	R09H10.5	protein_coding	IV	10621716		3993.61	1.1248	0.0623746	2.03751	0.041599	0.542179
WBGene00009601	F40G12.6	protein_coding	V	14271134		5.0954	-2.19257	0.607126	-2.03705	0.0416452	0.542304
WBGene00011910	alg-3	protein_coding	IV	11704251	Argonaute (plant)-Like Gene	64.2415	1.65505	0.388807	2.03674	0.0416765	0.542304
WBGene00010634	K07F5.6	protein_coding	IV	9844989		6.23199	1.69611	0.622757	2.03284	0.042069	0.546965
WBGene00010898	nphp-1	protein_coding	II	10648938	Nephrocystin-1-like protein	9.43657	-1.92148	0.524161	-2.0295	0.0424077	0.55092
WBGene00015541	C06E7.4	protein_coding	IV	5850839		79.102	-1.40458	0.209929	-2.029	0.0424587	0.551135
WBGene00015937	C17H12.12	protein_coding	IV	6795927		63.1995	1.65305	0.390175	2.02806	0.0425546	0.551931
WBGene00011322	irld-14	protein_coding	V	14996591	Insulin/EGF-Receptor L Domain protein	6.56957	1.66952	0.621645	2.02764	0.042597	0.552033
WBGene00008754	F13E9.5	protein_coding	IV	10882932		7.90206	1.8582	0.591106	2.0269	0.0426725	0.552562
WBGene00189993	C49C3.21	protein_coding	IV	17343051		7.98405	1.8668	0.57983	2.02551	0.0428153	0.553962
WBGene00001700	grd-11	protein_coding	V	20356802	GRounDhog (hedgehog-like family)	4.51924	-1.81592	0.608378	-2.02224	0.0431516	0.55786
WBGene00012789	Y43D4A.3	protein_coding	IV	16766598		6.89288	-2.1286	0.636531	-2.0218	0.0431969	0.557995
WBGene00009854	clec-31	protein_coding	V	16856458	C-type LECtin	17.9345	1.68522	0.384761	2.02135	0.0432435	0.558146
WBGene00045305	ZC250.4	protein_coding	V	5812313		772.059	1.26324	0.136107	2.01605	0.0437946	0.564802
WBGene00018865	F55A12.6	protein_coding	I	5338922		14.446	1.70691	0.397649	2.01388	0.0440221	0.567277
WBGene00000082	adt-1	protein_coding	X	12678832	ADAMTS family	39.8427	-1.5135	0.269589	-2.01144	0.0442789	0.570127
WBGene00003471	mtd-1	protein_coding	I	15001854	Mec-3 (Three) Dependent expression	71.2816	-1.42023	0.216446	-2.00891	0.0445464	0.573108
WBGene00022157	Y71G12B.22	protein_coding	I	1663400		12.971	1.57768	0.613289	2.0059	0.0448668	0.576766
WBGene00004809	skr-3	protein_coding	V	16121780	SKp1 Related (ubiquitin ligase complex component)	1675.32	1.15547	0.079609	2.00115	0.0453766	0.582527
WBGene00012827	Y43F8C.5	protein_coding	V	19631369		11.4877	1.80164	0.572259	2.00104	0.045388	0.582527
WBGene00007239	C01G10.14	protein_coding	V	15105376	Major sperm protein	7.06548	1.8274	0.612738	1.99948	0.0455566	0.584222
WBGene00022872	ZK1240.8	protein_coding	II	2326995		5.68282	1.84778	0.616372	1.99822	0.0456932	0.585504
WBGene00000252	bli-2	protein_coding	II	5651410	BLIstered cuticle	11.8817	1.8067	0.479088	1.99268	0.0462962	0.592755
WBGene00000481	cha-1	protein_coding	IV	3613787	Choline O-acetyltransferase	41.0762	-1.58563	0.322113	-1.98971	0.0466226	0.595501
WBGene00015225	B0507.8	protein_coding	V	8760687		24.9007	1.75312	0.485796	1.99027	0.046561	0.595501
WBGene00018563	F47D12.7	protein_coding	III	6293247	Kelch repeat and BTB domain-containing protein F47D12.7	30.4557	1.72411	0.480082	1.99004	0.0465867	0.595501
WBGene00013987	ZK512.8	protein_coding	III	9146047		28.9824	1.67867	0.407642	1.98886	0.0467163	0.596221
WBGene00044360	C33C12.11	protein_coding	II	2163341		13.332	1.74698	0.426352	1.98693	0.0469302	0.598354
WBGene00206502	T01B7.13	protein_coding	II	8715417		4.18448	-2.14686	0.606753	-1.98668	0.0469584	0.598354
WBGene00044631	bus-18	protein_coding	V	11773720		29.1042	-1.632	0.350493	-1.98547	0.0470919	0.599577
WBGene00017660	F21C10.11	protein_coding	V	9123488		124.266	1.56379	0.314188	1.98343	0.0473199	0.602
WBGene00009605	F40G12.10	protein_coding	V	14283569		20.1644	1.75188	0.483683	1.98281	0.0473889	0.602397
WBGene00011494	T05F1.9	protein_coding	I	9645699		74.5612	1.47449	0.264024	1.98022	0.0476787	0.605118
WBGene00014029	ZK637.12	protein_coding	III	8922292		26.1624	1.71504	0.426778	1.98024	0.0476764	0.605118
WBGene00020759	T24C4.3	protein_coding	III	871783		14.2303	1.779	0.494142	1.97627	0.0481237	0.610281
WBGene00021963	lipl-6	protein_coding	V	6931622	LIPase Like	12.866	-1.80946	0.465842	-1.97473	0.0482992	0.61202
WBGene00045306	ZC250.5	protein_coding	V	5805767		6.76058	1.83172	0.606924	1.9742	0.0483594	0.612296
WBGene00001555	gcy-35	protein_coding	I	13325362	Soluble guanylate cyclase gcy-35	55.8477	-1.49452	0.267236	-1.96662	0.0492271	0.622789
WBGene00017131	E04F6.15	protein_coding	II	7208801		403.794	1.23331	0.123273	1.96484	0.0494325	0.624892
WBGene00018170	nspb-1	protein_coding	IV	6590796	Nematode Specific Peptide family, group B	4.50377	-2.19993	0.621413	-1.96297	0.0496498	0.626647
WBGene00044316	F41G3.21	protein_coding	II	6752352		34.4967	1.5741	0.329365	1.96317	0.0496267	0.626647
WBGene00001754	gst-6	protein_coding	II	4879885	Probable glutathione S-transferase 6	896.835	1.26823	0.142998	1.96241	0.0497152	0.626977
WBGene00000060	acr-21	protein_coding	III	6583511	AcetylCholine Receptor	12.0658	-1.82311	0.447498	-1.9601	0.0499842	0.62961
WBGene00005189	srg-32	protein_coding	V	10587167	Serpentine receptor class gamma	16.4298	1.72518	0.44384	1.95985	0.0500131	0.62961
WBGene00011175	R09E10.5	protein_coding	IV	10296087		8.46275	1.96708	0.581705	1.9596	0.0500423	0.62961
WBGene00011401	T03F6.6	protein_coding	III	13378441	Receptor expression-enhancing protein	19.5086	1.74059	0.548686	1.959	0.0501133	0.630007
WBGene00001447	flp-4	protein_coding	II	10054625	FMRF-Like Peptide	101.766	-1.37977	0.203711	-1.95401	0.0506998	0.636879
WBGene00000720	col-147	protein_coding	V	9632271	COLlagen	571.706	-1.20982	0.109944	-1.95293	0.050828	0.637542
WBGene00001374	exp-2	protein_coding	V	6139836		55.0649	-1.458	0.251939	-1.95289	0.0508325	0.637542
WBGene00009548	F38H4.4	protein_coding	IV	11848250		14.0671	1.76099	0.545335	1.94726	0.0515037	0.645454
WBGene00016180	C28C12.4	protein_coding	IV	8487497		70.9683	1.55614	0.325006	1.9453	0.0517384	0.647886
WBGene00022736	ZK418.7	protein_coding	III	7078935		425.046	1.25636	0.138035	1.9443	0.0518595	0.648895
WBGene00009457	F36A2.10	protein_coding	I	8819412		49.1043	1.64316	0.395538	1.94354	0.0519512	0.649533
WBGene00012398	Y6E2A.4	protein_coding	V	15712206		44.7963	1.51533	0.296459	1.94251	0.0520751	0.650572
WBGene00011114	R07E5.6	protein_coding	III	4398813		15.4974	1.71448	0.592059	1.94183	0.0521575	0.651092
WBGene00019311	K02E7.6	protein_coding	II	1057183		32.8654	-1.5794	0.310679	-1.9414	0.0522096	0.651233
WBGene00000284	cah-6	protein_coding	I	3629471	Carbonic AnHydrase	37.9905	-1.52442	0.285541	-1.93972	0.0524138	0.652905
WBGene00018050	clec-139	protein_coding	II	4619988	C-type LECtin	31.7763	1.5279	0.300666	1.93962	0.0524254	0.652905
WBGene00010829	M02B1.4	protein_coding	IV	12823821		13.2135	1.75678	0.527568	1.93815	0.0526045	0.654624
WBGene00006553	tbx-34	protein_coding	III	11216395	Putative T-box protein 34	12.1194	1.34628	0.628567	1.93758	0.0526748	0.654989
WBGene00009949	F53A2.1	protein_coding	III	13322431		14.4794	-1.77547	0.441414	-1.93666	0.0527865	0.655416
WBGene00014103	best-26	protein_coding	I	14200020	Bestrophin homolog 26	31.8873	1.52286	0.295	1.93662	0.0527913	0.655416
WBGene00018004	F33D11.7	protein_coding	I	5850038		9.86623	1.58304	0.612108	1.9289	0.0537433	0.666718
WBGene00009727	lips-1	protein_coding	X	12492865	LIPaSe related	38.5186	-1.49551	0.266038	-1.9264	0.0540547	0.67006
WBGene00018736	F53B1.3	protein_coding	X	2105629		3.0043	-1.90651	0.631346	-1.92283	0.0545012	0.675071
WBGene00009388	F35B12.9	protein_coding	V	11601119		187.182	-1.26607	0.144675	-1.91808	0.0551015	0.681977
WBGene00011749	ssp-36	protein_coding	IV	9765674	Sperm Specific family, class P	4.88797	1.59354	0.641825	1.91619	0.0553415	0.684417
WBGene00017325	F10C1.3	protein_coding	II	5756949		8.79664	1.58985	0.616968	1.9156	0.0554163	0.684811
WBGene00007180	B0457.6	protein_coding	II	8922452		346.965	1.27322	0.150067	1.91308	0.0557372	0.688245
WBGene00008709	F11E6.6	protein_coding	IV	17464555		62.7107	1.46825	0.26821	1.91238	0.0558269	0.688819
WBGene00018926	F56A11.6	protein_coding	IV	580270		22.7038	1.7176	0.503521	1.91123	0.0559745	0.690107
WBGene00235295	C42D4.19	protein_coding	IV	7175646		27.3803	-1.23709	0.538119	-1.90983	0.0561545	0.691792
WBGene00016069	C24H10.3	protein_coding	X	5061054		5.98546	-2.02403	0.571428	-1.90813	0.0563738	0.693959
WBGene00020890	fbxa-202	protein_coding	V	6327246	F-box A protein	7.90689	1.34518	0.639014	1.90775	0.0564233	0.694032
WBGene00008830	nhr-176	protein_coding	V	16071436	Nuclear Hormone Receptor family	256.276	1.24454	0.134106	1.9036	0.0569618	0.700117
WBGene00008599	F09A5.2	protein_coding	X	13135107	Putative tyrosine-protein kinase F09A5.2	92.3557	1.41415	0.238797	1.89532	0.0580501	0.711859
WBGene00016544	math-18	protein_coding	II	2154012	MATH (meprin-associated Traf homology) domain containing	125.508	1.27897	0.154431	1.89544	0.0580344	0.711859
WBGene00018134	F37A4.4	protein_coding	III	6713583	Ankyrin repeat-containing protein F37A4.4	26.729	1.68939	0.478593	1.89531	0.0580509	0.711859
WBGene00012379	Y1A5A.1	protein_coding	III	3985564		11.0576	1.51771	0.608651	1.89416	0.0582032	0.713179
WBGene00044533	F41F3.8	protein_coding	V	4648832		6.81027	-1.89134	0.553837	-1.8921	0.0584774	0.71599
WBGene00006522	abcx-1	protein_coding	II	6532163	ABC transporter, eXtended	25.2682	-1.6332	0.355141	-1.89112	0.0586085	0.717045
WBGene00015987	C18G1.9	protein_coding	V	4767888		11.152	1.75143	0.575617	1.89041	0.0587027	0.717648
WBGene00010683	K08F8.7	protein_coding	II	8754070		7.45564	-1.93166	0.539808	-1.88801	0.0590245	0.72103
WBGene00010058	F54E4.2	protein_coding	X	14625585		115.554	-1.4321	0.235082	-1.88761	0.059078	0.72113
WBGene00013523	Y73F8A.14	protein_coding	IV	15318572		5.70669	1.58626	0.628953	1.88556	0.0593548	0.723956
WBGene00007425	C08B6.4	protein_coding	V	10114765		8.48529	1.85707	0.585607	1.88267	0.0597456	0.726061
WBGene00008581	acl-13	protein_coding	IV	12410504	ACyLtransferase-like	14.0961	1.73306	0.517016	1.88263	0.0597501	0.726061
WBGene00009753	scrm-6	protein_coding	I	11253350	SCRaMblase (phospholipid scramblase)	4.44509	1.60107	0.63189	1.88338	0.0596493	0.726061
WBGene00010366	H05L14.1	protein_coding	I	7972473		25.4463	1.69161	0.511365	1.88226	0.0598002	0.726061
WBGene00017028	dex-1	protein_coding	III	5526071	Dendrite extension defective protein 1	84.7073	-1.37254	0.212234	-1.88366	0.0596115	0.726061
WBGene00044467	R05C11.4	protein_coding	IV	2051500		89.7219	-1.33937	0.191252	-1.8825	0.0597678	0.726061
WBGene00021579	clec-73	protein_coding	IV	3953935	C-type LECtin	45.9401	1.63914	0.428115	1.88166	0.0598823	0.726505
WBGene00006047	ssp-19	protein_coding	I	2562658	Sperm-specific class P protein 19	11.5473	1.72692	0.582448	1.8784	0.0603261	0.731334
WBGene00013126	mltn-2	protein_coding	I	11018571	MLt-TeN (mlt-10) related	22.6304	-1.6096	0.484426	-1.87773	0.0604176	0.731888
WBGene00019345	tmem-135	protein_coding	X	4673711	TMEM (human TransMEMbrane protein) homolog	664.948	1.16874	0.0928272	1.8726	0.0611233	0.739334
WBGene00020978	W03B1.9	protein_coding	IV	4352618		15.4832	-0.968883	0.610623	-1.87259	0.0611249	0.739334
WBGene00000478	cfz-2	protein_coding	V	3441501	Caenorhabditis FriZzled homolog	30.7365	-1.56528	0.329415	-1.87015	0.0614631	0.742861
WBGene00010205	F57F5.3	protein_coding	V	12004632		7.1634	-2.01198	0.535167	-1.86833	0.0617165	0.744796
WBGene00010724	K09E9.1	protein_coding	X	15620489		884.952	1.26036	0.14622	1.86865	0.0616712	0.744796
WBGene00003547	nas-29	protein_coding	II	5138521	Zinc metalloproteinase nas-29	19.5482	-1.71631	0.429008	-1.8665	0.0619721	0.747316
WBGene00013713	Y106G6G.4	protein_coding	I	10321348		77.1513	1.53292	0.33286	1.8654	0.0621256	0.748601
WBGene00010611	K07A1.4	protein_coding	I	9588661		14.7293	1.72554	0.517726	1.86499	0.0621822	0.748719
WBGene00003759	nlp-21	protein_coding	III	11388630	Neuropeptide-Like Protein	186.197	-1.32047	0.183323	-1.86393	0.062331	0.749945
WBGene00013449	Y67A6A.1	protein_coding	I	9829759		9.86972	1.70958	0.59045	1.86099	0.0627455	0.754363
WBGene00119204	ZC116.5	protein_coding	V	12608171		5.00135	1.31789	0.644903	1.86055	0.0628082	0.754549
WBGene00001586	ggr-1	protein_coding	II	10695054	Glycine receptor subunit beta-type 4	10.3036	-1.83083	0.477821	-1.85997	0.0628897	0.75496
WBGene00021148	W10G11.19	protein_coding	II	3550651		210.917	1.27069	0.153595	1.85693	0.063321	0.759567
WBGene00011075	R07A4.4	protein_coding	X	10751645		8.84357	-1.94723	0.540077	-1.8522	0.0639975	0.767105
WBGene00015767	hex-2	protein_coding	V	5654449	HEXosaminidase	955.391	1.14738	0.0819594	1.84718	0.0647205	0.775189
WBGene00255420	Y51F10.15	protein_coding	I	1945814		7.90957	1.71388	0.59679	1.84612	0.0648755	0.776463
WBGene00009462	sre-22	protein_coding	I	11282473	Serpentine Receptor, class E (epsilon)	3.90858	-2.03072	0.62523	-1.84504	0.0650314	0.777746
WBGene00010216	F57G8.7	protein_coding	V	16329370		5.4654	-2.15244	0.584301	-1.84308	0.0653171	0.780579
WBGene00005712	srv-1	protein_coding	III	6851252	Serpentine receptor class V-1	380.332	1.19565	0.110122	1.84103	0.0656175	0.783582
WBGene00009523	clec-165	protein_coding	IV	1245399	C-type LECtin	18.2446	1.72398	0.473895	1.84065	0.0656733	0.783663
WBGene00005685	sru-22	protein_coding	V	15972907	Serpentine Receptor, class U	7.12275	1.86765	0.550003	1.84027	0.0657292	0.783744
WBGene00021969	Y57G7A.6	protein_coding	II	1281974		34.4702	1.6376	0.443237	1.83605	0.0663509	0.790566
WBGene00011954	T23F11.2	protein_coding	III	4654307		22.6364	1.67594	0.490643	1.83554	0.0664262	0.790873
WBGene00015389	scav-1	protein_coding	X	5397676	SCAVenger receptor (CD36 family) related	1111.61	1.16069	0.0902631	1.83375	0.0666909	0.793433
WBGene00001210	egl-46	protein_coding	V	6679329	C2H2 zinc finger protein EGL-46; Uncharacterized protein	22.2719	-1.59913	0.34489	-1.83327	0.0667619	0.793686
WBGene00011911	T22B3.3	protein_coding	IV	11703182	Major sperm protein	18.2389	1.69046	0.522602	1.83192	0.0669633	0.795488
WBGene00003941	pbo-1	protein_coding	III	2681445		872.26	1.17155	0.0967569	1.83014	0.0672297	0.798059
WBGene00001458	flp-15	protein_coding	III	13663402	FMRF-Like Peptide	179.892	-1.27367	0.154686	-1.82906	0.0673906	0.799374
WBGene00020659	T21G5.1	protein_coding	I	6874304	Tyrosine-protein kinase	14.1366	1.70071	0.541429	1.82834	0.067498	0.800054
WBGene00021620	Y47D7A.7	protein_coding	V	4419454		3.28712	1.61118	0.648744	1.82681	0.067729	0.802196
WBGene00015281	C01B10.7	protein_coding	IV	6638556		3.56507	-1.8166	0.641618	-1.82334	0.0682523	0.807197
WBGene00022261	clec-210	protein_coding	V	3118377	C-type LECtin	79.85	-1.41538	0.43586	-1.82337	0.0682476	0.807197
WBGene00006306	sue-1	protein_coding	I	7360392	SUppressor of Elongation defect	93.795	-1.32541	0.185923	-1.82217	0.0684297	0.808696
WBGene00015929	C17H12.3	protein_coding	IV	6793915	Protein-tyrosine-phosphatase	29.3182	1.64765	0.487612	1.82139	0.0685475	0.809489
WBGene00020359	math-40	protein_coding	II	1830632	MATH (meprin-associated Traf homology) domain containing	147.624	1.27102	0.157063	1.81643	0.0693043	0.817821
WBGene00044455	F23F12.13	protein_coding	III	6495677		114.179	1.27994	0.161464	1.81568	0.0694191	0.818571
WBGene00020353	T08B6.4	protein_coding	IV	4905681		62.4871	1.56268	0.37607	1.81356	0.0697456	0.821775
WBGene00044387	C27A2.8	protein_coding	II	5067088		7.1577	-1.95119	0.5263	-1.81325	0.0697938	0.821775
WBGene00206388	K10C2.14	protein_coding	X	6439894		34.8125	1.50774	0.315565	1.80977	0.0703308	0.827488
WBGene00018398	sptl-2	protein_coding	V	8017947	Serine palmitoyltransferase 2	1474.16	1.23103	0.133874	1.80508	0.0710627	0.835483
WBGene00018786	hmbx-1	protein_coding	I	989671	HMBOX (mammalian HoMeoBOX gene) homolog	107.182	-1.37213	0.220793	-1.79746	0.072263	0.84897
WBGene00001099	dsc-4	protein_coding	IV	315053	Defecation Suppressor of Clk-1	1523.84	1.1336	0.0762587	1.79692	0.0723484	0.849242
WBGene00015033	B0207.10	protein_coding	I	5959008		4.38432	-2.01571	0.609657	-1.79664	0.0723925	0.849242
WBGene00012449	nhr-231	protein_coding	V	18791000	Nuclear Hormone Receptor family	103.069	1.32852	0.196632	1.79623	0.0724574	0.849379
WBGene00007415	C07E3.4	protein_coding	II	10360871		4.53456	1.13301	0.649388	1.79391	0.0728279	0.851945
WBGene00022063	Y67D8B.4	protein_coding	IV	3173550		124.105	-1.27478	0.158467	-1.79385	0.0728363	0.851945
WBGene00219300	W10G6.6	protein_coding	X	16247747		24.2334	1.60151	0.399279	1.79424	0.0727746	0.851945
WBGene00010571	K04G11.3	protein_coding	X	14345284		99.0591	1.32041	0.191333	1.79274	0.073014	0.853398
WBGene00011197	srw-145	protein_coding	V	13937223	Serpentine Receptor, class W	20.8642	-1.59949	0.339733	-1.79036	0.0733959	0.857234
WBGene00020125	R173.3	protein_coding	X	7030225		45.9509	-1.42857	0.2446	-1.78587	0.0741209	0.865069
WBGene00017326	dmd-5	protein_coding	II	5772065	DM (Doublesex/MAB-3) Domain family	3.66321	1.81044	0.6262	1.78471	0.0743076	0.866615
WBGene00007543	fipr-7	protein_coding	V	10229812	FIP (Fungus-Induced Protein) Related	3.6328	1.72521	0.642988	1.78214	0.0747259	0.870687
WBGene00019508	K07H8.8	protein_coding	IV	8266752		4.27934	-2.05391	0.636325	-1.7819	0.0747658	0.870687
WBGene00016707	C46E10.1	protein_coding	II	3724260		14.4958	1.6241	0.581771	1.78035	0.0750189	0.872997
WBGene00014253	ZK1320.3	protein_coding	II	9659243		3960.73	1.1551	0.0898611	1.77927	0.0751947	0.873769
WBGene00015900	nhr-157	protein_coding	V	3866556	Nuclear Hormone Receptor family	3.85661	-1.97574	0.626913	-1.77939	0.0751757	0.873769
WBGene00003554	nas-38	protein_coding	X	558141	Zinc metalloproteinase nas-38	16.4926	-1.67382	0.453187	-1.77281	0.0762595	0.885134
WBGene00014048	ZK666.8	protein_coding	II	10491667		3.2124	1.28584	0.649924	1.77267	0.0762836	0.885134
WBGene00008661	F10G8.1	protein_coding	I	10019706	Protein-tyrosine-phosphatase	12.0159	1.07411	0.639523	1.77224	0.0763551	0.885319
WBGene00016327	C32E12.1	protein_coding	I	5232576		17.8059	1.65407	0.505276	1.77069	0.076613	0.887666
WBGene00003729	nhx-1	protein_coding	X	16017518	Sodium/hydrogen exchanger	129.578	1.31327	0.19055	1.76334	0.0778431	0.901264
WBGene00015994	C18H7.4	protein_coding	IV	593334	Tyrosine-protein kinase	10.6852	1.64203	0.592037	1.76197	0.0780741	0.903283
WBGene00011533	T06E4.5	protein_coding	V	9631240		4.81584	-1.99298	0.596086	-1.75678	0.0789561	0.912166
WBGene00044477	F49F1.14	protein_coding	IV	4110544		6.65312	-1.91709	0.548812	-1.75684	0.0789452	0.912166
WBGene00016973	abch-1	protein_coding	II	6528615	ABC transporter, class H	8.83997	-1.8237	0.498707	-1.75551	0.0791718	0.913996
WBGene00014836	T09F5.12	protein_coding	V	15164814		375.885	1.26681	0.161682	1.75426	0.0793857	0.915803
WBGene00015223	B0507.6	protein_coding	V	8746158		56.6994	1.45894	0.295339	1.75268	0.0796571	0.91791
WBGene00044491	Y54G2A.48	protein_coding	IV	2831577		3.94581	1.21825	0.650146	1.75253	0.0796832	0.91791
WBGene00016753	oac-9	protein_coding	I	6265691	O-ACyltransferase homolog	19.1182	1.63574	0.485081	1.75146	0.0798674	0.918706
WBGene00022002	Y59E9AR.7	protein_coding	IV	5241364	Major sperm protein	11.0551	0.40846	0.469683	1.75178	0.079812	0.918706
WBGene00017514	F16F9.3	protein_coding	X	8457638		13.2024	-1.69585	0.464737	-1.7501	0.080101	0.920729
WBGene00008669	acs-14	protein_coding	V	9508097	fatty Acid CoA Synthetase family	1666.55	1.13846	0.0813747	1.74944	0.0802148	0.921373
WBGene00022665	ZK154.1	protein_coding	X	7779620		39.8121	-1.48125	0.296955	-1.74898	0.0802937	0.921617
WBGene00015382	C03B1.14	protein_coding	X	6359408		275.636	1.22925	0.137945	1.74532	0.0809291	0.928243
WBGene00010453	fozi-1	protein_coding	III	9286051	Formin-homology and zinc finger domains protein 1	267.684	1.2572	0.157294	1.73587	0.0825867	0.946576
WBGene00000491	che-12	protein_coding	V	10299473		45.1046	-1.44444	0.27855	-1.7341	0.0828995	0.949478
WBGene00000729	col-156	protein_coding	V	11449223	COLlagen	5.41964	-2.03455	0.595877	-1.73354	0.0829989	0.949935
WBGene00009840	fbxa-189	protein_coding	V	17345228	F-box A protein	241.188	1.20537	0.124544	1.72387	0.0847315	0.969071
WBGene00021165	Y5H2B.3	protein_coding	V	2188285		12.3619	-1.80544	0.462312	-1.72292	0.0849021	0.970327
WBGene00019950	clec-175	protein_coding	IV	4422339	C-type LECtin	5.82286	1.46786	0.630905	1.72244	0.0849897	0.970633
WBGene00007393	fbxa-157	protein_coding	V	17899828	F-box A protein	78.0805	1.36248	0.229011	1.72069	0.0853067	0.973025
WBGene00020833	T26C12.3	protein_coding	IV	3269462		11.4811	-1.70235	0.475966	-1.72061	0.085321	0.973025
WBGene00012518	comt-2	protein_coding	V	16493655	Catechol-O-MethylTransferase family	45.0206	1.38986	0.246113	1.71718	0.085946	0.979454
WBGene00000731	col-158	protein_coding	V	11829582	COLlagen	210.791	-1.36904	0.23425	-1.71539	0.0862734	0.982483
WBGene00008239	fshr-1	protein_coding	V	9889839	FSHR (mammalian follicle stimulating hormone receptor) homolog	1536.11	1.12224	0.0732839	1.71203	0.0868916	0.988818
WBGene00015032	B0207.9	protein_coding	I	5957460		5.87159	1.44987	0.631193	1.71161	0.086968	0.988982
WBGene00001171	egl-2	protein_coding	V	1289373	EAG K+ channel EGL-2	63.9368	-1.34797	0.212505	-1.70985	0.0872941	0.991984
WBGene00021405	Y38C1AB.3	protein_coding	IV	21493		4.49234	1.71118	0.612517	1.70901	0.0874482	0.993029
WBGene00005660	srr-9	protein_coding	V	7738010	Serpentine Receptor, class R	5.91494	1.45692	0.63491	1.70667	0.0878827	0.997254
WBGene00000001	aap-1	protein_coding	I	5107843	phosphoinositide kinase AdAPter subunit	2559.3	-0.143836	0.0599901	0	1	1
WBGene00000002	aat-1	protein_coding	IV	9598977	Amino Acid Transporter	96.9477	0.499468	0.187736	0	1	1
WBGene00000003	aat-2	protein_coding	V	9244412	Amino Acid Transporter	147.776	-0.47997	0.169951	0	1	1
WBGene00000004	aat-3	protein_coding	X	2552436	Amino Acid Transporter	350.62	-0.783869	0.125743	0	1	1
WBGene00000005	aat-4	protein_coding	IV	6272591	Amino Acid Transporter	224.884	0.712085	0.122732	0	1	1
WBGene00000006	aat-5	protein_coding	I	2571776	Amino Acid Transporter	147.716	-0.776072	0.157955	0	1	1
WBGene00000007	aat-6	protein_coding	V	11466842	Amino Acid Transporter	296.811	1.15254	0.133141	1.22351	0.221137	1
WBGene00000008	aat-7	protein_coding	II	1386888	Amino Acid Transporter	11.7844	1.46551	0.492346	1.26566	0.205635	1
WBGene00000009	aat-8	protein_coding	IV	3862129	Amino Acid Transporter	23.1654	0.789292	0.346779	0	1	1
WBGene00000010	aat-9	protein_coding	I	11388747	Amino Acid Transporter	1068.33	-0.325704	0.0995355	0	1	1
WBGene00000012	abf-1	protein_coding	I	3886111	Antibacterial factor-related peptide 1	5.85184	0.557594	0.542478	0	1	1
WBGene00000013	abf-2	protein_coding	I	3885548	Antibacterial factor-related peptide 2	46.7755	1.45939	0.416702	1.4562	0.145336	1
WBGene00000015	abf-4	protein_coding	V	20557945	AntiBacterial Factor related	5.35177	-0.196578	0.546684	0	1	1
WBGene00000017	abf-6	protein_coding	X	12794177	AntiBacterial Factor related	55.8404	0.241152	0.368708	0	1	1
WBGene00000018	abl-1	protein_coding	X	10605832	Tyrosine-protein kinase abl-1	505.197	-0.310304	0.134158	0	1	1
WBGene00000019	abt-1	protein_coding	IV	10206193	ABC Transporter family	40.7164	0.570369	0.317829	0	1	1
WBGene00000020	abt-2	protein_coding	I	2255923	ABC Transporter family	771.897	0.536731	0.118827	0	1	1
WBGene00000023	abt-5	protein_coding	I	12011276	ABC Transporter family	26.4228	0.253037	0.411445	0	1	1
WBGene00000031	abu-8	protein_coding	V	5192993	Activated in Blocked Unfolded protein response	3.25672	0.990796	0.647913	0.834199	0.404169	1
WBGene00000034	abu-11	protein_coding	II	192531	Activated in Blocked Unfolded protein response	8.80034	0.183558	0.5278	0	1	1
WBGene00000035	ace-1	protein_coding	X	16367229	Acetylcholinesterase 1	182.609	0.15029	0.144284	0	1	1
WBGene00000036	ace-2	protein_coding	I	3302092	Carboxylic ester hydrolase	284.877	-0.271937	0.132102	0	1	1
WBGene00000037	ace-3	protein_coding	II	14205633	Carboxylic ester hydrolase	42.2915	0.0161154	0.281051	0	1	1
WBGene00000040	aco-1	protein_coding	X	11339874	Probable cytoplasmic aconitate hydratase	4083.29	0.58335	0.0922258	0	1	1
WBGene00000041	aco-2	protein_coding	III	7973717	Probable aconitate hydratase, mitochondrial	14505.2	-0.163881	0.102235	0	1	1
WBGene00000042	acr-2	protein_coding	X	6702692	Acetylcholine receptor subunit beta-type acr-2	13.7582	-0.937129	0.407437	-0.0927372	0.926112	1
WBGene00000043	acr-3	protein_coding	X	6709538	Acetylcholine receptor subunit beta-type acr-3	8.31456	0.818227	0.503291	0.0121149	0.990334	1
WBGene00000044	acr-5	protein_coding	III	6509699	Acetylcholine receptor subunit alpha-type acr-5	28.6865	-1.27642	0.324105	-1.06433	0.287179	1
WBGene00000046	acr-7	protein_coding	II	7845662	Acetylcholine receptor subunit alpha-type acr-7	12.2958	-0.497225	0.434494	0	1	1
WBGene00000047	acr-8	protein_coding	X	10412763	AcetylCholine Receptor	34.0015	0.0997196	0.280965	0	1	1
WBGene00000048	acr-9	protein_coding	X	13642348	AcetylCholine Receptor	5.03543	-0.821085	0.588497	-0.357806	0.720489	1
WBGene00000049	acr-10	protein_coding	X	4022273	AcetylCholine Receptor	6.80372	-0.0860479	0.543556	0	1	1
WBGene00000050	acr-11	protein_coding	I	6621628	AcetylCholine Receptor	35.3055	0.527405	0.313618	0	1	1
WBGene00000051	acr-12	protein_coding	X	13532921	AcetylCholine Receptor	83.8969	0.366921	0.22089	0	1	1
WBGene00000053	acr-14	protein_coding	II	8174845	AcetylCholine Receptor	3.40909	-0.547037	0.635505	0	1	1
WBGene00000054	acr-15	protein_coding	V	8552695	AcetylCholine Receptor	48.9055	0.754062	0.286049	0	1	1
WBGene00000055	acr-16	protein_coding	V	8561216	Acetylcholine receptor subunit alpha-type acr-16	78.0316	-0.574321	0.199	0	1	1
WBGene00000056	acr-17	protein_coding	V	2608656	AcetylCholine Receptor	25.3073	-0.214371	0.363438	0	1	1
WBGene00000057	acr-18	protein_coding	V	15551155	AcetylCholine Receptor	36.937	0.788496	0.345145	0	1	1
WBGene00000058	acr-19	protein_coding	I	9031274	AcetylCholine Receptor	24.5587	-1.11358	0.371827	-0.547008	0.584373	1
WBGene00000059	acr-20	protein_coding	II	14373831	AcetylCholine Receptor	89.6617	-0.0975995	0.207605	0	1	1
WBGene00000061	lgc-11	protein_coding	X	7503823	Ligand-Gated ion Channel	3.14775	0.0120538	0.642795	0	1	1
WBGene00000062	acr-23	protein_coding	V	3651660	Betaine receptor acr-23	17.6187	-1.13632	0.377262	-0.543586	0.586727	1
WBGene00000063	act-1	protein_coding	V	11079167	Actin-1	16948.8	0.158516	0.112233	0	1	1
WBGene00000064	act-2	protein_coding	V	11076737	Actin-2	18568.7	-0.447076	0.135306	0	1	1
WBGene00000065	act-3	protein_coding	V	11071684	Actin-1	16784	-0.0622311	0.0714117	0	1	1
WBGene00000066	act-4	protein_coding	X	4960553	Actin-4	13730.1	0.354905	0.0834976	0	1	1
WBGene00000067	act-5	protein_coding	III	13604339	ACTin	12299.5	0.890309	0.109367	0	1	1
WBGene00000068	acy-1	protein_coding	III	4722212	Adenylyl CYclase	230.075	-0.547137	0.133318	0	1	1
WBGene00000069	acy-2	protein_coding	V	5976029	Adenylyl CYclase	30.6911	0.298028	0.311256	0	1	1
WBGene00000070	acy-3	protein_coding	III	3774893	Adenylyl CYclase	379.087	0.20303	0.108249	0	1	1
WBGene00000071	acy-4	protein_coding	V	5624723	Adenylyl CYclase	324.193	0.754459	0.127132	0	1	1
WBGene00000072	add-1	protein_coding	X	4854077	Adducin-related protein 1	334.349	0.684733	0.112458	0	1	1
WBGene00000073	add-2	protein_coding	V	12009551	Adducin-related protein 2	510.119	0.0934997	0.107135	0	1	1
WBGene00000074	adm-2	protein_coding	X	13687973	ADAM (disintegrin plus metalloprotease) family	859.007	0.0502519	0.139268	0	1	1
WBGene00000075	adm-4	protein_coding	X	7795044	ADAM (disintegrin plus metalloprotease) family	480.769	-0.175287	0.128775	0	1	1
WBGene00000079	adr-1	protein_coding	I	7773416	Adenosine Deaminase acting on RNA	2133.77	-0.171485	0.113061	0	1	1
WBGene00000080	adr-2	protein_coding	III	7230964	Probable double-stranded RNA-specific adenosine deaminase	2607.15	-0.0285645	0.0807254	0	1	1
WBGene00000081	ads-1	protein_coding	III	295647	Alkyldihydroxyacetonephosphate synthase	3775.15	0.893681	0.0938403	0	1	1
WBGene00000083	adt-2	protein_coding	X	7585587	ADAMTS family	982.36	-0.5757	0.113797	0	1	1
WBGene00000084	aex-1	protein_coding	I	7602311	AEX-1; Uncharacterized protein	730.234	1.04283	0.109111	0.457438	0.647356	1
WBGene00000085	aex-2	protein_coding	X	9650999	AEX-2; Uncharacterized protein	18.7514	-1.20399	0.360515	-0.745916	0.455718	1
WBGene00000086	aex-3	protein_coding	X	751211	MAP kinase-activating death domain protein	375.02	0.197314	0.111607	0	1	1
WBGene00000088	aex-5	protein_coding	I	14850070		433.973	0.574599	0.107478	0	1	1
WBGene00000089	aex-6	protein_coding	I	13543094	Rab27; Uncharacterized protein	151.809	0.163678	0.155385	0	1	1
WBGene00000090	age-1	protein_coding	II	11519499	Phosphatidylinositol 3-kinase age-1	1635.35	-0.299721	0.167761	0	1	1
WBGene00000092	ags-3	protein_coding	X	5289728	Activator of G protein Signalling	587.937	-0.479545	0.151482	0	1	1
WBGene00000093	agt-1	protein_coding	IV	13368459	AlkylGuanine DNA alkylTransferase	789.818	0.0921943	0.120715	0	1	1
WBGene00000094	agt-2	protein_coding	II	5371806	AlkylGuanine DNA alkylTransferase	664.118	-0.255877	0.126736	0	1	1
WBGene00000095	aha-1	protein_coding	I	10193926	Aryl hydrocarbon receptor nuclear translocator homolog	811.327	-0.274668	0.0957369	0	1	1
WBGene00000097	aip-1	protein_coding	V	14012333	Arsenite Inducible Protein	1340.38	-0.0524715	0.107398	0	1	1
WBGene00000098	air-1	protein_coding	V	8221410	Aurora/Ipl1 Related kinase	6434.79	-0.112323	0.0670573	0	1	1
WBGene00000099	air-2	protein_coding	I	5937477	Aurora/IPL1-related protein kinase 2	1780.22	-0.0955321	0.0672096	0	1	1
WBGene00000100	ajm-1	protein_coding	X	9098346	Apical Junction Molecule	2132.95	0.010161	0.0841599	0	1	1
WBGene00000101	aka-1	protein_coding	II	7472729	A Kinase Anchor protein	6289.51	-0.164759	0.0958809	0	1	1
WBGene00000102	akt-1	protein_coding	V	10248907	Serine/threonine-protein kinase akt-1	5372.01	-0.126165	0.0597748	0	1	1
WBGene00000103	akt-2	protein_coding	X	14147700	Serine/threonine-protein kinase akt-2	499.64	-0.454841	0.10891	0	1	1
WBGene00000105	alg-1	protein_coding	X	13949142		1341.29	-0.219878	0.112282	0	1	1
WBGene00000106	alg-2	protein_coding	II	873176		871.075	-0.76369	0.176436	0	1	1
WBGene00000107	alh-1	protein_coding	III	5077765	ALdehyde deHydrogenase	6364.75	0.141861	0.0428793	0	1	1
WBGene00000109	alh-3	protein_coding	IV	11022603	10-formyltetrahydrofolate dehydrogenase	2706.4	0.626253	0.0571665	0	1	1
WBGene00000110	alh-4	protein_coding	V	6427211	Aldehyde dehydrogenase	3573.95	0.254335	0.0529894	0	1	1
WBGene00000111	alh-5	protein_coding	V	1996109	Aldehyde dehydrogenase	517.985	0.196764	0.178164	0	1	1
WBGene00000112	alh-6	protein_coding	II	1306240	ALdehyde deHydrogenase	1332.37	-0.0557181	0.0990009	0	1	1
WBGene00000113	alh-7	protein_coding	II	13485792	ALdehyde deHydrogenase	918.631	0.0110721	0.0832715	0	1	1
WBGene00000114	alh-8	protein_coding	II	11728949	Probable methylmalonate-semialdehyde dehydrogenase	12847.3	0.302477	0.0921717	0	1	1
WBGene00000115	alh-9	protein_coding	III	5856038	Putative aldehyde dehydrogenase family 7 member A1 homolog	2953.39	-0.0140583	0.0980455	0	1	1
WBGene00000116	alh-10	protein_coding	X	7140502	ALdehyde deHydrogenase	608.95	0.452721	0.0974725	0	1	1
WBGene00000117	alh-11	protein_coding	III	774323	ALdehyde deHydrogenase	1099.04	0.337254	0.102109	0	1	1
WBGene00000118	alh-12	protein_coding	III	7454012	ALdehyde deHydrogenase	1627.93	0.306553	0.0833774	0	1	1
WBGene00000120	aly-1	protein_coding	IV	9108931	Ref/ALY RNA export adaptor family	469.864	-0.116624	0.130102	0	1	1
WBGene00000121	aly-2	protein_coding	IV	9147466	Ref/ALY RNA export adaptor family	6495.34	-0.193182	0.082618	0	1	1
WBGene00000122	aly-3	protein_coding	IV	12123155	Ref/ALY RNA export adaptor family	4929.09	-0.0867971	0.0731032	0	1	1
WBGene00000123	ama-1	protein_coding	IV	4248070	DNA-directed RNA polymerase II subunit RPB1	3033.59	-0.829194	0.171944	0	1	1
WBGene00000134	amt-2	protein_coding	IV	13042391	Putative ammonium transporter 2	7.59664	-0.779567	0.525895	0	1	1
WBGene00000135	amt-3	protein_coding	II	8363196	Putative ammonium transporter 3	32.8108	-0.421538	0.28146	0	1	1
WBGene00000137	amx-1	protein_coding	III	3822403	Amine oxidase family member 1	331.062	-0.357787	0.10964	0	1	1
WBGene00000138	amx-2	protein_coding	I	12759586	AMine oXidase family	278.2	0.391355	0.132634	0	1	1
WBGene00000139	amx-3	protein_coding	V	20898937	AMine oXidase family	239.602	0.902465	0.161595	0	1	1
WBGene00000140	anc-1	protein_coding	I	4321095	Nuclear anchorage protein 1	8016.25	0.193381	0.12935	0	1	1
WBGene00000142	aos-1	protein_coding	V	10127494	SUMO-activating enzyme subunit aos-1	3498.87	-0.037025	0.0873515	0	1	1
WBGene00000143	apc-2	protein_coding	III	8080613	Anaphase-promoting complex subunit 2	2135.01	-0.10298	0.0663432	0	1	1
WBGene00000144	apc-10	protein_coding	V	10425362	Anaphase Promoting Complex; see also mat	1053.75	-0.00378476	0.114428	0	1	1
WBGene00000145	apc-11	protein_coding	III	4593769	Anaphase Promoting Complex; see also mat	1220.53	-0.13864	0.106268	0	1	1
WBGene00000146	ape-1	protein_coding	V	11675942	Apoptotic enhancer 1 protein	3966	-0.311078	0.117084	0	1	1
WBGene00000147	aph-1	protein_coding	I	9232067	Gamma-secretase subunit aph-1	1408.03	-0.0839136	0.0942647	0	1	1
WBGene00000148	aph-2	protein_coding	I	10340997	Nicastrin	1680.2	-0.0320058	0.0809691	0	1	1
WBGene00000149	apl-1	protein_coding	X	5112434	Beta-amyloid-like protein	3822.86	-0.0836431	0.0702707	0	1	1
WBGene00000150	apm-1	protein_coding	I	5342178	AdaPtin, Mu/medium chain (clathrin associated complex)	1025.79	0.647926	0.0949303	0	1	1
WBGene00000151	apn-1	protein_coding	II	8047564	DNA-(apurinic or apyrimidinic site) lyase	2341.78	-0.0788918	0.0893373	0	1	1
WBGene00000155	app-1	protein_coding	I	4964667	AminoPeptidase P	5564.98	0.0431947	0.0603002	0	1	1
WBGene00000156	apr-1	protein_coding	I	8050043	Adenomatous polyposis coli protein-related protein 1	3058.95	-0.238986	0.0973783	0	1	1
WBGene00000157	aps-2	protein_coding	X	4458272	AdaPtin, Small chain (clathrin associated complex)	525.408	0.0390618	0.118231	0	1	1
WBGene00000158	apg-1	protein_coding	I	14406028	AdaPtin, Gamma chain (clathrin associated complex)	2216.23	-0.0468857	0.0820188	0	1	1
WBGene00000159	aps-1	protein_coding	V	6017970	AdaPtin, Small chain (clathrin associated complex)	2091.33	0.0477178	0.120706	0	1	1
WBGene00000160	apb-1	protein_coding	III	2583974	AP complex subunit beta	2031.8	-0.412948	0.136773	0	1	1
WBGene00000161	apa-2	protein_coding	X	9336819	AdaPtin, Alpha chain (clathrin associated complex)	1343.14	-0.336232	0.0934703	0	1	1
WBGene00000162	apd-3	protein_coding	II	3532526	AP-3 complex subunit delta	1306.5	-0.568539	0.147983	0	1	1
WBGene00000163	apb-3	protein_coding	I	7853750		3149.44	-0.15619	0.0803262	0	1	1
WBGene00000164	apm-3	protein_coding	X	954935	AdaPtin, Mu/medium chain (clathrin associated complex)	403.748	-0.148869	0.113039	0	1	1
WBGene00000165	aps-3	protein_coding	I	1155343	AdaPtin, Small chain (clathrin associated complex)	844.08	-0.0267985	0.0947508	0	1	1
WBGene00000166	apt-9	protein_coding	X	11068527	AdaPTin or adaptin-related protein	20.7005	-0.762881	0.40699	0	1	1
WBGene00000168	apx-1	protein_coding	V	3210191	Anterior pharynx in excess protein 1	1680.79	-0.760396	0.196775	0	1	1
WBGene00000169	aqp-1	protein_coding	II	7235834	AQuaPorin or aquaglyceroporin related	497.182	0.140344	0.126896	0	1	1
WBGene00000171	aqp-3	protein_coding	IV	10961235	AQuaPorin or aquaglyceroporin related	39.0816	0.499412	0.276894	0	1	1
WBGene00000172	aqp-4	protein_coding	V	9737592	AQuaPorin or aquaglyceroporin related	386.246	1.07601	0.115566	0.725187	0.468337	1
WBGene00000174	aqp-6	protein_coding	V	10648446	AQuaPorin or aquaglyceroporin related	18.593	-0.72972	0.38075	0	1	1
WBGene00000175	aqp-7	protein_coding	X	3025062	AQuaPorin or aquaglyceroporin related	2932.93	0.543405	0.112135	0	1	1
WBGene00000176	aqp-8	protein_coding	X	4702964	AQuaPorin or aquaglyceroporin related	950.982	1.18916	0.116071	1.70138	0.0888711	1
WBGene00000177	aqp-9	protein_coding	I	9605931	AQuaPorin or aquaglyceroporin related	147.341	0.756073	0.13866	0	1	1
WBGene00000178	aqp-10	protein_coding	II	9768451	Putative aquaporin-10	1139.79	0.399649	0.0908097	0	1	1
WBGene00000179	aqp-11	protein_coding	III	13673278	AQuaPorin or aquaglyceroporin related	828.081	0.812019	0.0854407	0	1	1
WBGene00000180	arc-1	protein_coding	II	9674978	E3 ubiquitin-protein ligase arc-1	396.458	0.325289	0.124331	0	1	1
WBGene00000181	ard-1	protein_coding	IV	11131279	Alcohol/Ribitol Dehydrogenase family	4618.28	0.257412	0.0983904	0	1	1
WBGene00000182	arf-1.2	protein_coding	III	5716115	ADP-ribosylation factor 1-like 2	8407.85	0.116494	0.0467427	0	1	1
WBGene00000183	arf-3	protein_coding	IV	7982526	ADP-Ribosylation Factor related	8675.44	0.0244251	0.0466021	0	1	1
WBGene00000184	arf-6	protein_coding	IV	16947128	ADP-Ribosylation Factor related	811.376	-0.13682	0.103733	0	1	1
WBGene00000186	ark-1	protein_coding	IV	12622084	Ack-related non-receptor tyrosine kinase	1003.92	-0.644639	0.171266	0	1	1
WBGene00000187	arl-1	protein_coding	II	8581945	ADP-ribosylation factor-like protein 1	1747.2	0.146347	0.0923251	0	1	1
WBGene00000188	arl-3	protein_coding	II	14607212	ADP-ribosylation factor-like protein 3	19.5584	-1.01854	0.356105	-0.231409	0.816997	1
WBGene00000189	arl-5	protein_coding	III	9823235	ADP-ribosylation factor-like protein 5	689.411	-0.0870626	0.121574	0	1	1
WBGene00000192	arl-8	protein_coding	IV	14798149	ARF-Like	4284.86	-0.00492632	0.0630006	0	1	1
WBGene00000193	arl-6	protein_coding	III	4813309	ADP-ribosylation factor-like protein 6	4.00218	-0.277141	0.615954	0	1	1
WBGene00000195	arr-1	protein_coding	X	950782	Probable beta-arrestin	307.951	-0.438813	0.108894	0	1	1
WBGene00000196	aars-1	protein_coding	II	11460163	Alanine--tRNA ligase, mitochondrial	1105.18	0.0486102	0.0707561	0	1	1
WBGene00000197	aars-2	protein_coding	I	3983171	Alanine--tRNA ligase, cytoplasmic	6920.69	-0.293549	0.108529	0	1	1
WBGene00000198	art-1	protein_coding	II	6970668	Probable very-long-chain enoyl-CoA reductase art-1	6015.26	0.53507	0.0724706	0	1	1
WBGene00000199	arx-1	protein_coding	I	2883496	Actin-related protein 3	2300.61	-0.0193833	0.091172	0	1	1
WBGene00000200	arx-2	protein_coding	V	10335266	Actin-related protein 2	3907.9	0.140004	0.0538866	0	1	1
WBGene00000201	arx-3	protein_coding	III	12052428	ARp2/3 compleX component	2217.85	-0.0229637	0.0739858	0	1	1
WBGene00000202	exos-4.2	protein_coding	III	860198	EXOSome (multiexonuclease complex) component	1510.06	-0.0999833	0.0947521	0	1	1
WBGene00000203	arx-5	protein_coding	III	12816790	Probable actin-related protein 2/3 complex subunit 3	1627.41	0.0509939	0.0852455	0	1	1
WBGene00000204	arx-6	protein_coding	III	4878658	Probable actin-related protein 2/3 complex subunit 4	1805.02	0.0340428	0.0926364	0	1	1
WBGene00000205	arx-7	protein_coding	I	3069232	Actin-related protein 2/3 complex subunit 5	919.219	0.103131	0.097388	0	1	1
WBGene00000206	asb-1	protein_coding	III	4594541	ATP Synthase B homolog	9214.66	0.0734186	0.0783308	0	1	1
WBGene00000207	asb-2	protein_coding	X	4469743	ATP Synthase B homolog	3749.68	0.384687	0.0952618	0	1	1
WBGene00000208	asc-1	protein_coding	II	15039402	human Activating Signal Cointegrator homolog	1295.51	0.00182453	0.0922646	0	1	1
WBGene00000209	asg-1	protein_coding	I	8692946	Probable ATP synthase subunit g 1, mitochondrial	4303.71	0.0904712	0.12218	0	1	1
WBGene00000210	asg-2	protein_coding	X	6841258	Probable ATP synthase subunit g 2, mitochondrial	2726.87	0.476887	0.116425	0	1	1
WBGene00000211	asm-1	protein_coding	II	6910072	Sphingomyelin phosphodiesterase 1	236.152	0.449922	0.13726	0	1	1
WBGene00000214	asp-1	protein_coding	V	19049123	ASpartyl Protease	28316.6	0.728818	0.149018	0	1	1
WBGene00000215	asp-2	protein_coding	V	9199680	ASpartyl Protease	10758.6	0.982911	0.10219	0	1	1
WBGene00000217	asp-4	protein_coding	X	13218977	ASpartyl Protease	12511.3	0.155285	0.0917091	0	1	1
WBGene00000218	asp-5	protein_coding	V	8272375	ASpartyl Protease	11717.4	0.493382	0.124535	0	1	1
WBGene00000219	asp-6	protein_coding	V	8267546	Aspartic protease 6	31678.5	1.15822	0.107011	1.54222	0.12302	1
WBGene00000221	atf-5	protein_coding	X	14808846	ATF (cAMP-dependent transcription factor) family	1461.18	0.268551	0.0794039	0	1	1
WBGene00000222	atf-6	protein_coding	X	12480948	ATF (cAMP-dependent transcription factor) family	354.479	-0.245897	0.118524	0	1	1
WBGene00000223	atf-7	protein_coding	III	4491627	ATF (cAMP-dependent transcription factor) family	5668.59	-0.0212628	0.0759798	0	1	1
WBGene00000224	atgp-1	protein_coding	IV	17269342	Amino acid Transporter GlycoProtein subunit	888.287	-0.223399	0.0975974	0	1	1
WBGene00000225	atgp-2	protein_coding	II	14640096	Amino acid Transporter GlycoProtein subunit	418.473	-0.899981	0.105078	0	1	1
WBGene00000226	atl-1	protein_coding	V	9634861	Serine/threonine-protein kinase ATR	2420.03	-0.129679	0.0833676	0	1	1
WBGene00000227	atm-1	protein_coding	I	183364	Serine/threonine-protein kinase ATM	1123.64	-0.406429	0.170872	0	1	1
WBGene00000229	atp-2	protein_coding	III	5228417	ATP synthase subunit beta, mitochondrial	37240.6	-0.0775811	0.103487	0	1	1
WBGene00000230	atp-3	protein_coding	I	5428543	ATP synthase subunit	11412.7	0.153727	0.0719677	0	1	1
WBGene00000231	atx-2	protein_coding	III	10461389	human ATX (ataxin) related	4551.98	-0.35924	0.167138	0	1	1
WBGene00000232	avr-14	protein_coding	I	5967251	Inhibitory amino acid receptor subunit gbr-2B	78.7578	-0.391772	0.222746	0	1	1
WBGene00000233	avr-15	protein_coding	V	13498786	GluClalpha2B protein	176.024	-0.328561	0.144245	0	1	1
WBGene00000235	baf-1	protein_coding	III	9467457	Barrier-to-autointegration factor 1	2624.06	0.120545	0.104588	0	1	1
WBGene00000236	bag-1	protein_coding	I	6563640	BAG family molecular chaperone regulator 1	1550.46	-0.0189121	0.111272	0	1	1
WBGene00000237	bam-2	protein_coding	I	2949609	BAM-2; Uncharacterized protein	732.776	0.28439	0.0874064	0	1	1
WBGene00000238	bar-1	protein_coding	X	7166003	Beta-catenin/armadillo-related protein 1	312.862	0.481391	0.129971	0	1	1
WBGene00000239	bas-1	protein_coding	III	5612274	Biogenic Amine Synthesis related	594.278	0.51928	0.09265	0	1	1
WBGene00000240	pah-1	protein_coding	II	8762668	Probable phenylalanine-4-hydroxylase 1	1822.66	0.3185	0.0806173	0	1	1
WBGene00000241	bbs-1	protein_coding	I	14371142	Bardet-Biedl syndrome 1 protein homolog	9.11858	-1.30704	0.50337	-0.777902	0.436627	1
WBGene00000242	bbs-2	protein_coding	IV	7934097	Bardet-Biedl syndrome 2 protein homolog	12.6392	-1.44666	0.451098	-1.27338	0.202882	1
WBGene00000244	bbs-8	protein_coding	V	6762476	Tetratricopeptide repeat protein 8	19.3761	-0.709724	0.391224	0	1	1
WBGene00000245	bca-1	protein_coding	X	6201908	Beta carbonic anhydrase 1	587.263	-0.0269476	0.0923044	0	1	1
WBGene00000246	bcc-1	protein_coding	IV	11086090	BiCaudal C (Drosophila) homolog	88.7631	0.545465	0.191145	0	1	1
WBGene00000247	bec-1	protein_coding	IV	5661142	BEClin (human autophagy) homolog	1404.77	-0.00950864	0.0875268	0	1	1
WBGene00000248	ben-1	protein_coding	III	3538293		675.41	-0.921863	0.0998339	0	1	1
WBGene00000249	bir-1	protein_coding	V	11644374	BIR (baculovirus inhibitory repeat) family	1509.53	-0.110374	0.110057	0	1	1
WBGene00000250	bir-2	protein_coding	V	13568834	BIR (baculovirus inhibitory repeat) family	667.696	-0.272991	0.120868	0	1	1
WBGene00000251	bli-1	protein_coding	II	10708960	Cuticle collagen bli-1	17.5901	0.898828	0.39009	0	1	1
WBGene00000253	bli-3	protein_coding	I	146488	Dual oxidase 1	529.599	0.193611	0.0896726	0	1	1
WBGene00000254	bli-4	protein_coding	I	6342231	Endoprotease bli-4	5922.57	-0.116784	0.0699169	0	1	1
WBGene00000255	bli-5	protein_coding	III	13427723	BLIstered cuticle	12.6835	-0.0551979	0.43616	0	1	1
WBGene00000257	bmk-1	protein_coding	V	14453303	Kinesin-like protein	2409.02	-0.218261	0.0831141	0	1	1
WBGene00000259	bpl-1	protein_coding	II	6274265	Biotin Protein Ligase	1320.41	0.0680272	0.0750722	0	1	1
WBGene00000262	bra-1	protein_coding	X	13598471	BMP Receptor Associated protein family	202.63	0.0760361	0.14148	0	1	1
WBGene00000263	F23H11.5	protein_coding	III	909990		5203.42	0.157656	0.114984	0	1	1
WBGene00000264	brc-1	protein_coding	III	3853105	BRCa homolog (tumor suppressor gene Brca1)	969.862	-0.238071	0.155468	0	1	1
WBGene00000265	brd-1	protein_coding	III	6885202	BRCA1-associated RING domain protein 1	1116.72	-0.248722	0.0932826	0	1	1
WBGene00000266	bre-1	protein_coding	IV	8987130	GDP-mannose 4,6 dehydratase 1	796.888	0.917288	0.0958365	0	1	1
WBGene00000267	bre-2	protein_coding	III	13133923	Beta-1,3-galactosyltransferase bre-2	138.996	0.735978	0.153841	0	1	1
WBGene00000268	bre-3	protein_coding	III	9469926	Beta-1,4-mannosyltransferase bre-3	3710.59	0.266612	0.075738	0	1	1
WBGene00000269	bre-4	protein_coding	I	1621351	Beta-1,4-N-acetylgalactosaminyltransferase bre-4	411.267	-0.082376	0.125472	0	1	1
WBGene00000270	bre-5	protein_coding	IV	12049261	Beta-1,3-galactosyltransferase bre-5	846.847	-0.0523413	0.112473	0	1	1
WBGene00000271	brf-1	protein_coding	II	7305861	BRF (transcription factor) homolog	1653.87	-0.099898	0.0919179	0	1	1
WBGene00000272	bro-1	protein_coding	I	5186943	BROther (Drosophila tx factor partner) homolog	19.5916	0.2533	0.444156	0	1	1
WBGene00000273	brp-1	protein_coding	III	12020552	Bypass of Response to Pheromone in yeast	8547.04	-0.139923	0.0776099	0	1	1
WBGene00000274	btf-1	protein_coding	II	13200163	BTAF (TBP-associated factor) homolog	1486.9	-0.362192	0.137553	0	1	1
WBGene00000275	bub-1	protein_coding	I	7251941	Mitotic checkpoint serine/threonine-protein kinase BUB1	4032.28	-0.258004	0.106876	0	1	1
WBGene00000276	byn-1	protein_coding	III	6932001	Cell adhesion protein byn-1	2734.74	-0.0173407	0.0785575	0	1	1
WBGene00000277	cab-1	protein_coding	X	12199655		2782.71	-0.0399967	0.0854711	0	1	1
WBGene00000279	cah-1	protein_coding	III	5083206	Putative carbonic anhydrase-like protein 1	64.5826	-0.0664464	0.234814	0	1	1
WBGene00000280	cah-2	protein_coding	II	7480753	Putative carbonic anhydrase-like protein 2	23.863	-0.82993	0.322021	0	1	1
WBGene00000281	cah-3	protein_coding	X	16487479	Putative carbonic anhydrase 3	1346.92	0.805725	0.0931879	0	1	1
WBGene00000283	cah-5	protein_coding	X	7020024	Putative carbonic anhydrase 5	742.003	0.19801	0.0878311	0	1	1
WBGene00000285	cal-1	protein_coding	V	12514876	Calmodulin-like protein	268.212	0.754057	0.132972	0	1	1
WBGene00000286	cal-2	protein_coding	II	8960712	CALmodulin related genes	289.573	0.0367198	0.129261	0	1	1
WBGene00000287	cal-3	protein_coding	IV	3829546	CALmodulin related genes	28.8912	1.18386	0.377572	0.766075	0.443632	1
WBGene00000288	cal-4	protein_coding	IV	10524768	CALmodulin related genes	70.435	-0.437118	0.201871	0	1	1
WBGene00000289	cam-1	protein_coding	II	9295937	Tyrosine-protein kinase receptor cam-1	1315.87	-0.259735	0.105673	0	1	1
WBGene00000292	cap-1	protein_coding	IV	7228337	F-actin-capping protein subunit alpha	3519.87	0.0295027	0.0517336	0	1	1
WBGene00000293	cap-2	protein_coding	II	10869196	F-actin-capping protein subunit beta	4208.2	0.0927018	0.0572221	0	1	1
WBGene00000294	cas-1	protein_coding	X	16807458	Adenylyl cyclase-associated protein	2309.8	0.199069	0.101456	0	1	1
WBGene00000295	cat-1	protein_coding	X	5705719		14.7774	0.652943	0.429015	0	1	1
WBGene00000296	cat-2	protein_coding	II	257819	Tyrosine 3-monooxygenase	6.79625	1.03505	0.578651	0.620346	0.53503	1
WBGene00000298	cat-4	protein_coding	V	10564878	GTP cyclohydrolase 1	2059	0.471704	0.124226	0	1	1
WBGene00000301	cav-1	protein_coding	IV	9772510	Caveolin-1	416.586	-0.363456	0.139685	0	1	1
WBGene00000302	cav-2	protein_coding	V	13557160	Caveolin-2	105.576	-0.388291	0.19718	0	1	1
WBGene00000366	cbp-1	protein_coding	III	9766516		4038.41	-0.57991	0.155356	0	1	1
WBGene00000367	cca-1	protein_coding	X	7847685	Calcium Channel, Alpha subunit	295.273	0.0254443	0.134473	0	1	1
WBGene00000368	ccb-1	protein_coding	I	3641705	Calcium Channel, Beta subunit	154.068	-0.500499	0.153121	0	1	1
WBGene00000369	ccf-1	protein_coding	III	11918827	CCR4-NOT transcription complex subunit 7	2023.1	-0.371366	0.0915525	0	1	1
WBGene00000370	ccg-1	protein_coding	IV	15270158	Conserved Cysteine/Glycine domain protein	3245.97	-0.0677701	0.0838971	0	1	1
WBGene00000371	cco-1	protein_coding	I	9788749	Cytochrome C Oxidase	7979.09	0.277978	0.113237	0	1	1
WBGene00000372	cyp-13A7	protein_coding	II	9803620	Putative cytochrome P450 CYP13A7	50.7307	0.915561	0.315316	0	1	1
WBGene00000373	cyp-14A5	protein_coding	V	5421012	CYtochrome P450 family	613.947	0.216834	0.125868	0	1	1
WBGene00000375	cyp-44A1	protein_coding	II	5503966	Probable cytochrome P450 CYP44	1300.65	-0.026581	0.0834136	0	1	1
WBGene00000376	ccr-4	protein_coding	IV	12361570	CCR (yeast CCR4/NOT complex component) homolog	6977.09	-0.411759	0.114469	0	1	1
WBGene00000377	cct-1	protein_coding	II	8185443	T-complex protein 1 subunit alpha	10875.4	-0.190427	0.0731759	0	1	1
WBGene00000378	cct-2	protein_coding	II	8927741	T-complex protein 1 subunit beta	7655.52	-0.334575	0.103028	0	1	1
WBGene00000379	cct-4	protein_coding	II	8283667	T-complex protein 1 subunit delta	10251.5	-0.151408	0.0693946	0	1	1
WBGene00000380	cct-5	protein_coding	III	4499191	T-complex protein 1 subunit epsilon	17257.2	0.0315107	0.0510985	0	1	1
WBGene00000381	cct-6	protein_coding	III	5853532	T-complex protein 1 subunit zeta	8893.49	-0.167021	0.0795712	0	1	1
WBGene00000382	cdc-6	protein_coding	I	4268069	Cell Division Cycle related	2868.25	-0.0842382	0.073451	0	1	1
WBGene00000383	cdc-14	protein_coding	II	5587623	Probable tyrosine-protein phosphatase cdc-14	3963.58	-0.160511	0.0567481	0	1	1
WBGene00000386	cdc-25.1	protein_coding	I	6469385	M-phase inducer phosphatase cdc-25.1	4107.62	-0.353691	0.123836	0	1	1
WBGene00000387	cdc-25.2	protein_coding	V	1567076	M-phase inducer phosphatase cdc-25.2	531.155	-1.04515	0.171147	-0.36503	0.715089	1
WBGene00000388	cdc-25.3	protein_coding	III	8916417	M-phase inducer phosphatase cdc-25.3	736.356	-0.342961	0.120574	0	1	1
WBGene00000389	cdc-25.4	protein_coding	II	10188310	Cell Division Cycle related	3.2958	1.04598	0.648339	1.15985	0.246109	1
WBGene00000390	cdc-42	protein_coding	II	7616452	Cell division control protein 42 homolog	6097.34	0.0658551	0.0622737	0	1	1
WBGene00000391	cdd-1	protein_coding	X	8208751	CytiDine Deaminase	107.223	0.674596	0.229412	0	1	1
WBGene00000392	cdd-2	protein_coding	IV	7547118	CytiDine Deaminase	1031.11	-0.13868	0.117599	0	1	1
WBGene00000393	cdf-1	protein_coding	X	6499909	Cation diffusion facilitator family protein 1	1012.06	0.0253131	0.0805437	0	1	1
WBGene00000396	cdh-4	protein_coding	III	4520365	Cadherin-4	798.66	-0.782446	0.124255	0	1	1
WBGene00000397	cdh-5	protein_coding	IV	8669142	CaDHerin family	47.22	-0.0057196	0.283494	0	1	1
WBGene00000401	cdh-9	protein_coding	X	16595236	CaDHerin family	31.4678	-1.04991	0.291247	-0.306305	0.759372	1
WBGene00000403	casy-1	protein_coding	II	5945406	CAlSYntenin/Alcadein homolog	1092.48	-0.98519	0.0981076	0	1	1
WBGene00000405	cdk-1	protein_coding	III	9747432	Cyclin-dependent kinase 1	6934.82	-0.159786	0.0740918	0	1	1
WBGene00000406	cdk-4	protein_coding	X	13515855	Cyclin-dependent kinase 4 homolog	215.237	-0.154172	0.125474	0	1	1
WBGene00000407	cdk-5	protein_coding	III	13464684	Cyclin-dependent-like kinase 5	1202.67	-0.0214424	0.0814361	0	1	1
WBGene00000408	cdk-7	protein_coding	I	2281114	Cyclin-dependent kinase 7	2479	-0.0186482	0.0816654	0	1	1
WBGene00000409	cdk-8	protein_coding	I	8702478	Cyclin-dependent kinase 8	1959.55	-0.154761	0.0614145	0	1	1
WBGene00000410	cdk-9	protein_coding	I	11323527	Probable cyclin-dependent kinase 9	771.126	-0.115299	0.124978	0	1	1
WBGene00000411	cdl-1	protein_coding	II	10785452	Histone RNA hairpin-binding protein	3887.45	-0.624334	0.122966	0	1	1
WBGene00000412	cdr-1	protein_coding	V	15921361	CaDmium Responsive	80.1182	1.02851	0.215253	0.265116	0.79092	1
WBGene00000413	cdt-1	protein_coding	I	3223162	CDT (S. pombe CDC10 Dependent Transcript) homolog	1265.77	-0.445559	0.106908	0	1	1
WBGene00000414	cec-1	protein_coding	III	8426340	Chromo domain-containing protein cec-1	639.967	0.0726019	0.0805085	0	1	1
WBGene00000415	ced-1	protein_coding	I	11851343	Cell death abnormality protein 1	2561.29	-0.187052	0.0878863	0	1	1
WBGene00000416	ced-2	protein_coding	IV	1597316	Cell death abnormality protein 2	1453.63	-0.199636	0.112764	0	1	1
WBGene00000417	ced-3	protein_coding	IV	13198338	Cell death protein 3 Cell death protein 3 subunit 1 Cell death protein 3 subunit 2	3218.99	-0.468345	0.165576	0	1	1
WBGene00000418	ced-4	protein_coding	III	4852325	Cell death protein 4	1077.43	-0.0183453	0.088864	0	1	1
WBGene00000419	ced-5	protein_coding	IV	10484110	CED-5; Uncharacterized protein	2500.06	-0.189034	0.13899	0	1	1
WBGene00000420	ced-6	protein_coding	III	5595771	Cell death protein 6	1923.24	-0.134443	0.120158	0	1	1
WBGene00000421	ced-7	protein_coding	III	9570216	ABC transporter ced-7	4882.45	-0.217412	0.106747	0	1	1
WBGene00000422	ced-8	protein_coding	X	8414015	Cell death abnormality protein 8	157.029	0.00832753	0.169125	0	1	1
WBGene00000423	ced-9	protein_coding	III	10335172	Apoptosis regulator ced-9	1594.07	-0.132524	0.0682993	0	1	1
WBGene00000424	ced-10	protein_coding	IV	3506404	Ras-related protein ced-10	1561.37	-0.00260628	0.0691315	0	1	1
WBGene00000425	ced-11	protein_coding	III	9119559		66.2388	-0.739892	0.204311	0	1	1
WBGene00000426	ced-12	protein_coding	I	10222880	Cell death abnormality protein 12	2659.02	-0.000366873	0.0595336	0	1	1
WBGene00000427	ced-13	protein_coding	X	8299119		5.50176	-0.194217	0.64473	-0.334246	0.738194	1
WBGene00000428	ceh-1	protein_coding	X	4653434	Homeobox protein ceh-1	10.4035	0.237519	0.443342	0	1	1
WBGene00000429	ceh-2	protein_coding	I	6046832	Homeobox protein ceh-2	9.01577	-0.0573543	0.480888	0	1	1
WBGene00000430	ceh-5	protein_coding	I	9727204	Homeobox protein ceh-5	24.8447	0.403087	0.338528	0	1	1
WBGene00000431	ceh-6	protein_coding	I	8498114	Homeobox protein ceh-6	43.4599	-1.39534	0.266723	-1.58723	0.112461	1
WBGene00000434	ceh-9	protein_coding	I	565436	Homeobox protein ceh-9	3.35199	-0.0742565	0.632996	0	1	1
WBGene00000435	ceh-10	protein_coding	III	5799073	Homeobox protein ceh-10	14.5856	0.57053	0.402764	0	1	1
WBGene00000437	ceh-13	protein_coding	III	7555660	Homeobox protein ceh-13	112.586	0.861827	0.185753	0	1	1
WBGene00000438	ceh-14	protein_coding	X	7528616	Homeobox protein ceh-14	81.8308	-0.678989	0.214777	0	1	1
WBGene00000439	ceh-16	protein_coding	III	8622658	Homeobox protein engrailed-like ceh-16	14.099	-1.06108	0.406677	-0.312633	0.75456	1
WBGene00000441	ceh-18	protein_coding	X	3843379	Homeobox protein ceh-18	357.285	0.00584353	0.101938	0	1	1
WBGene00000442	ceh-19	protein_coding	IV	7953509	Homeobox protein ceh-19	50.813	1.05191	0.226793	0.366752	0.713804	1
WBGene00000443	ceh-20	protein_coding	III	6979884	Homeobox protein ceh-20	488.325	-0.604695	0.0866144	0	1	1
WBGene00000444	ceh-21	protein_coding	X	1848795	Homeobox protein ceh-21	261.798	-0.773247	0.169859	0	1	1
WBGene00000445	ceh-22	protein_coding	V	10672459	Homeobox protein ceh-22	3.41597	0.259213	0.620614	0	1	1
WBGene00000446	ceh-23	protein_coding	III	7839594	Homeobox protein ceh-23	5.49608	-1.02583	0.585599	-0.662746	0.507493	1
WBGene00000447	ceh-24	protein_coding	V	13813309	Homeobox protein ceh-24	6.59672	0.948256	0.559429	0.37272	0.709357	1
WBGene00000448	pros-1	protein_coding	III	8067289	Homeobox protein prospero homolog 1	58.5896	-0.791289	0.208548	0	1	1
WBGene00000449	ceh-27	protein_coding	V	11661553	C. Elegans Homeobox	6.79599	0.752373	0.585785	0.0985557	0.921491	1
WBGene00000451	ceh-30	protein_coding	X	3063585	Homeobox protein ceh-30	35.0786	0.311646	0.275355	0	1	1
WBGene00000452	ceh-31	protein_coding	X	3068648	Homeobox protein ceh-31	20.105	-0.894669	0.336142	0	1	1
WBGene00000453	ceh-32	protein_coding	V	11701761	Homeobox protein ceh-32	59.7803	0.183725	0.240263	0	1	1
WBGene00000454	ceh-33	protein_coding	V	5323204	Homeobox protein ceh-33	3.18361	-0.12288	0.627612	0	1	1
WBGene00000455	ceh-34	protein_coding	V	5315513	Homeobox protein ceh-34	18.2021	0.21595	0.388511	0	1	1
WBGene00000458	ceh-37	protein_coding	X	14197362	Homeobox protein ceh-37	170.545	0.959053	0.161831	0	1	1
WBGene00000459	ceh-38	protein_coding	II	6951640	Homeobox protein ceh-38	3496.93	-0.199369	0.105924	0	1	1
WBGene00000460	ceh-39	protein_coding	X	1854148	Homeobox protein ceh-39	308.522	-1.00208	0.182554	-0.123532	0.901686	1
WBGene00000461	ceh-40	protein_coding	X	12318159	Homeobox protein ceh-40	79.5823	-0.355855	0.216336	0	1	1
WBGene00000462	ceh-41	protein_coding	X	1846677	C. Elegans Homeobox	233.92	-0.37357	0.138971	0	1	1
WBGene00000463	ceh-43	protein_coding	III	4446635	Homeobox protein ceh-43	56.8656	-0.835441	0.209317	0	1	1
WBGene00000464	ceh-44	protein_coding	III	2530615	Homeobox protein cut-like ceh-44	2544.09	-0.0160369	0.0611842	0	1	1
WBGene00000465	cpg-1	protein_coding	III	4489359	Chondroitin proteoglycan 1	14455	-1.00301	0.319869	-0.212571	0.831662	1
WBGene00000466	cel-1	protein_coding	I	9665255	mRNA-capping enzyme Polynucleotide 5'-triphosphatase mRNA guanylyltransferase	1641.43	-0.0939784	0.0729076	0	1	1
WBGene00000467	cep-1	protein_coding	I	8324120	Transcription factor cep-1	1913.84	-0.0960519	0.0826988	0	1	1
WBGene00000469	ces-2	protein_coding	I	14961501	Cell death specification protein 2	27.0394	0.5775	0.304878	0	1	1
WBGene00000472	cey-1	protein_coding	II	11039449	C. Elegans Y-box	9001.24	-0.0600499	0.0939269	0	1	1
WBGene00000473	cey-2	protein_coding	I	5619569	C. Elegans Y-box	50788.8	-0.139113	0.0666819	0	1	1
WBGene00000474	cey-3	protein_coding	I	5571784	C. Elegans Y-box	22804.8	-0.00893601	0.0772797	0	1	1
WBGene00000475	cey-4	protein_coding	III	10866946	C. Elegans Y-box	12911.7	-0.0656285	0.0998224	0	1	1
WBGene00000476	cfi-1	protein_coding	I	9994731	AT-rich interactive domain-containing protein cfi-1	36.4693	-0.90268	0.278165	0	1	1
WBGene00000477	cft-1	protein_coding	V	5538800	Cystic Fibrosis Transmembrane conductance regulator homolog	31.7219	0.59508	0.33103	0	1	1
WBGene00000479	cgh-1	protein_coding	III	7495388	ATP-dependent RNA helicase cgh-1	45019.4	-0.399623	0.153037	0	1	1
WBGene00000480	cgp-1	protein_coding	V	118043	GTP-binding protein cgp-1	3128.67	-0.549683	0.114777	0	1	1
WBGene00000482	chd-3	protein_coding	X	12846430	Chromodomain-helicase-DNA-binding protein 3 homolog	1049.96	-0.643949	0.109596	0	1	1
WBGene00000484	che-2	protein_coding	X	481378	CHE-2 protein; Uncharacterized protein	8.20147	-0.677973	0.528866	0	1	1
WBGene00000485	che-3	protein_coding	I	8062011	Cytoplasmic dynein 2 heavy chain 1	60.7286	-1.00708	0.23846	-0.174721	0.861299	1
WBGene00000488	che-7	protein_coding	V	7961318	Innexin	21.4557	-1.32205	0.342831	-1.07386	0.282886	1
WBGene00000490	che-11	protein_coding	V	12144295		21.9736	-1.49052	0.390517	-1.44588	0.148211	1
WBGene00000492	che-13	protein_coding	I	10507000	Intraflagellar transport protein che-13	26.6464	-0.470074	0.334717	0	1	1
WBGene00000496	chs-1	protein_coding	I	7554892	CHitin Synthase	8271.27	-0.342442	0.143011	0	1	1
WBGene00000497	chs-2	protein_coding	II	196985	CHitin Synthase	152.06	-0.381712	0.2291	0	1	1
WBGene00000498	chk-1	protein_coding	V	3756781	Serine/threonine-protein kinase chk-1	1335.77	-0.268299	0.108024	0	1	1
WBGene00000499	chk-2	protein_coding	V	19908890	Serine/threonine-protein kinase chk-2	206.947	-0.0108895	0.15459	0	1	1
WBGene00000500	chn-1	protein_coding	I	6181314	C-term of Hsp70-iNteracting protein (CHIP family)	2689.77	-0.00520915	0.0824149	0	1	1
WBGene00000501	cho-1	protein_coding	IV	13209729	High-affinity choline transporter 1	31.4461	-0.904884	0.322736	0	1	1
WBGene00000502	chp-1	protein_coding	I	5103580	CHORD Protein	1962.56	0.0553193	0.0988194	0	1	1
WBGene00000503	cht-1	protein_coding	X	3397608	Probable endochitinase	132.989	-0.36424	0.267229	0	1	1
WBGene00000506	cic-1	protein_coding	III	2394329	Cyclin-C	662.194	0.0124539	0.0896944	0	1	1
WBGene00000507	cit-1.1	protein_coding	III	8005826	Cyclin-T1.1	1075.48	-0.272891	0.118146	0	1	1
WBGene00000508	cit-1.2	protein_coding	III	8010778	Cyclin-T1.2	1009.16	-0.143902	0.118421	0	1	1
WBGene00000509	cka-1	protein_coding	IV	9731737	Choline Kinase A	2106.93	0.131917	0.0686128	0	1	1
WBGene00000510	cka-2	protein_coding	X	4286737	Choline kinase A2	87.4242	-0.216364	0.201145	0	1	1
WBGene00000511	ckb-1	protein_coding	III	4365375	Choline kinase B1	129.841	0.74083	0.169543	0	1	1
WBGene00000512	ckb-2	protein_coding	III	4367832	Choline kinase B2	656.326	0.0576477	0.126377	0	1	1
WBGene00000514	ckb-4	protein_coding	V	2106398	Choline Kinase B	215.805	0.367563	0.138366	0	1	1
WBGene00000515	ckc-1	protein_coding	X	3576608	Choline Kinase C	834.116	0.417994	0.109194	0	1	1
WBGene00000516	cki-1	protein_coding	II	7811240	Cyclin-dependent kinase inhibitor 1	146.601	-0.129735	0.170316	0	1	1
WBGene00000517	cki-2	protein_coding	II	7816509	CKI family (Cyclin-dependent Kinase Inhibitor)	1151.59	-0.2486	0.121689	0	1	1
WBGene00000518	ckk-1	protein_coding	III	5635479	CaM Kinase Kinase	103.462	-0.718659	0.177696	0	1	1
WBGene00000519	cku-70	protein_coding	III	11154825	Caenorhabditis KU	1578.49	-0.0897389	0.0887655	0	1	1
WBGene00000520	cku-80	protein_coding	III	4419848	ATP-dependent DNA helicase II subunit 2	2205.01	-0.0963327	0.0773559	0	1	1
WBGene00000523	clc-2	protein_coding	X	7431470	Clc-like protein 2	92.1387	-0.28367	0.18822	0	1	1
WBGene00000524	clc-3	protein_coding	X	3373247	CLaudin-like in Caenorhabditis	101.858	0.189693	0.198392	0	1	1
WBGene00000525	clc-4	protein_coding	X	10782996	CLaudin-like in Caenorhabditis	9.14093	-0.481857	0.47955	0	1	1
WBGene00000526	clc-5	protein_coding	X	7433632	Clc-like protein 5	116.181	-0.281087	0.18294	0	1	1
WBGene00000527	cle-1	protein_coding	I	8705687	CoLlagen with Endostatin domain	1254.35	0.501259	0.0757555	0	1	1
WBGene00000529	clh-2	protein_coding	II	11358447	Chloride channel protein	53.2717	-0.801174	0.242962	0	1	1
WBGene00000530	clh-3	protein_coding	II	7217955	Chloride channel protein clh-3	569.58	-0.300541	0.145571	0	1	1
WBGene00000531	clh-4	protein_coding	X	4094871	Chloride channel protein	33.0841	-0.0245346	0.337302	0	1	1
WBGene00000532	clh-5	protein_coding	II	9094680	Chloride channel protein	2035.89	-0.2297	0.121933	0	1	1
WBGene00000533	clh-6	protein_coding	V	12060234	Chloride channel protein	1463.75	-0.197048	0.0666395	0	1	1
WBGene00000534	cpi-2	protein_coding	V	6044062	Cysteine Protease Inhibitor	4314.05	0.478484	0.0858058	0	1	1
WBGene00000535	cpi-1	protein_coding	IV	6092599	Cysteine Protease Inhibitor	7529.88	0.198836	0.120375	0	1	1
WBGene00000536	clk-1	protein_coding	III	5277894	5-demethoxyubiquinone hydroxylase, mitochondrial	919.169	0.153764	0.106406	0	1	1
WBGene00000537	clk-2	protein_coding	III	7515223	Telomere length regulation protein clk-2	1415.73	-0.125181	0.0743572	0	1	1
WBGene00000539	cln-3.1	protein_coding	V	11263522	Battenin	129.927	0.825525	0.18955	0	1	1
WBGene00000540	cln-3.2	protein_coding	I	5274696	Battenin	567.763	0.0268532	0.0898213	0	1	1
WBGene00000541	cln-3.3	protein_coding	V	8682965	Battenin	104.144	1.06076	0.17284	0.452485	0.65092	1
WBGene00000542	clp-1	protein_coding	III	7981074	Calpain clp-1	4409	-0.0888411	0.122496	0	1	1
WBGene00000543	clp-2	protein_coding	III	4700325	CaLPain family	1390.9	-0.188076	0.0829748	0	1	1
WBGene00000544	clp-3	protein_coding	I	12073071	CaLPain family	24.6633	0.329963	0.359177	0	1	1
WBGene00000545	clp-4	protein_coding	III	1807734	CaLPain family	1204.59	-0.0126919	0.0881428	0	1	1
WBGene00000546	clp-6	protein_coding	IV	1431180	CaLPain family	36.8321	0.146057	0.354614	0	1	1
WBGene00000547	clp-7	protein_coding	IV	1435467	CaLPain family	1993.91	-0.338127	0.124931	0	1	1
WBGene00000548	clr-1	protein_coding	II	5466363	Receptor-type tyrosine-protein phosphatase	2517.98	-0.52301	0.134839	0	1	1
WBGene00000549	cls-2	protein_coding	III	9055052	CLASP family of microtubule-binding proteins	1626.19	-0.34792	0.135061	0	1	1
WBGene00000550	clu-1	protein_coding	III	9516649	Clustered mitochondria protein homolog	7014.2	-0.168656	0.0795623	0	1	1
WBGene00000551	clx-1	protein_coding	IV	7734647	CoLlagen sequence X-hybridizing	5.2827	0.60603	0.645705	0.48515	0.62757	1
WBGene00000552	cmd-1	protein_coding	V	1156271	Calmodulin	6157.55	-0.199975	0.076812	0	1	1
WBGene00000553	cmk-1	protein_coding	IV	1824528	Calcium/calmodulin-dependent protein kinase type 1	87.0435	-1.25051	0.196569	-1.35913	0.174105	1
WBGene00000554	cnb-1	protein_coding	V	11375742	CalciNeurin B	957.203	0.0581001	0.089787	0	1	1
WBGene00000555	cnc-1	protein_coding	V	1443970	CaeNaCin (Caenorhabditis bacteriocin)	4.12668	0.307069	0.641853	0	1	1
WBGene00000556	cnc-2	protein_coding	V	1449667	CaeNaCin (Caenorhabditis bacteriocin)	156.884	-0.470455	0.2586	0	1	1
WBGene00000557	cnc-3	protein_coding	V	1448031	CaeNaCin (Caenorhabditis bacteriocin)	123.007	-0.162109	0.180067	0	1	1
WBGene00000558	cnc-4	protein_coding	V	1447222	CaeNaCin (Caenorhabditis bacteriocin)	170.279	-0.503789	0.223644	0	1	1
WBGene00000560	cnc-6	protein_coding	III	1763524	CaeNaCin (Caenorhabditis bacteriocin)	20.8969	-0.143896	0.571623	-0.065022	0.948156	1
WBGene00000561	cnd-1	protein_coding	III	5240593	Neurogenic differentiation factor 1	4.89511	-0.672914	0.564405	0	1	1
WBGene00000562	cng-1	protein_coding	V	15025740	Cyclic Nucleotide Gated channel	135.401	0.244809	0.20512	0	1	1
WBGene00000564	cnk-1	protein_coding	III	10271257	Connector enhancer of kinase suppressor of ras	1348.46	-0.450879	0.161358	0	1	1
WBGene00000565	cnt-1	protein_coding	II	12072070	CeNTaurin	1192.25	-0.0818162	0.112879	0	1	1
WBGene00000566	cnt-2	protein_coding	III	10655770	CeNTaurin	1475.76	-0.216543	0.13738	0	1	1
WBGene00000567	cnx-1	protein_coding	III	9814383	Calnexin	5285.15	-0.0201613	0.0578045	0	1	1
WBGene00000583	cof-2	protein_coding	I	6250571	COlmedin (collagen plus olFactomedin) family	53.9525	0.00719143	0.264112	0	1	1
WBGene00000584	cog-1	protein_coding	II	14902493	COG-1A; Uncharacterized protein	41.328	-0.709347	0.256917	0	1	1
WBGene00000585	cogc-2	protein_coding	IV	7036960	Conserved oligomeric Golgi complex subunit 2	2240.99	-0.0560714	0.0776434	0	1	1
WBGene00000591	coh-1	protein_coding	X	7465265	COHesin family	404.721	-0.575995	0.206328	0	1	1
WBGene00000592	coh-3	protein_coding	V	14457475	COHesin family	1147.89	-0.150346	0.105514	0	1	1
WBGene00000594	col-3	protein_coding	IV	8824804	COLlagen	1418.71	-1.54479	0.597591	-1.23152	0.218129	1
WBGene00000597	col-8	protein_coding	III	7019583	Cuticle collagen 8	12076.6	0.570091	0.139328	0	1	1
WBGene00000601	col-12	protein_coding	V	10423907	Cuticle collagen 12	181.753	-0.200593	0.173187	0	1	1
WBGene00000602	col-13	protein_coding	V	10420890	Cuticle collagen 13	128.52	-0.341833	0.284166	0	1	1
WBGene00000603	col-14	protein_coding	IV	7753408	Cuticle collagen 14	48.6772	0.452876	0.349931	0	1	1
WBGene00000608	col-19	protein_coding	X	421707	Cuticle collagen 19	16381.8	1.07953	0.139404	0.653655	0.513334	1
WBGene00000609	col-20	protein_coding	II	4869607	COLlagen	21757.4	0.935887	0.148369	0	1	1
WBGene00000615	col-38	protein_coding	II	8568033	COLlagen	78.5842	0.535545	0.227458	0	1	1
WBGene00000616	col-39	protein_coding	II	10704903	Cuticle collagen 39	317.507	-0.294318	0.126396	0	1	1
WBGene00000620	col-43	protein_coding	V	8049744	COLlagen	24.4689	-1.09365	0.343492	-0.414441	0.678551	1
WBGene00000621	col-44	protein_coding	X	13591498	COLlagen	3.27479	0.365665	0.647884	0	1	1
WBGene00000622	col-45	protein_coding	I	115739	COLlagen	12.1077	0.524436	0.493895	0	1	1
WBGene00000625	col-48	protein_coding	I	3010690	COLlagen	72.7751	0.228994	0.252843	0	1	1
WBGene00000630	col-53	protein_coding	I	5644737	COLlagen	25.1294	-0.931317	0.370191	-0.178864	0.858044	1
WBGene00000634	col-58	protein_coding	I	6311251	COLlagen	4.50478	-1.16563	0.584351	-0.628414	0.529733	1
WBGene00000636	col-60	protein_coding	I	7105319	COLlagen	21.6058	0.589266	0.381536	0	1	1
WBGene00000640	col-64	protein_coding	I	9893698	COLlagen	26.4566	0.0806867	0.362805	0	1	1
WBGene00000644	col-68	protein_coding	II	104534	COLlagen	32.5119	-0.1012	0.336546	0	1	1
WBGene00000647	col-71	protein_coding	II	3500073	COLlagen	36.9538	0.485266	0.330638	0	1	1
WBGene00000652	col-76	protein_coding	II	8204341	COLlagen	360.528	0.53151	0.121563	0	1	1
WBGene00000653	col-77	protein_coding	II	8358228	COLlagen	35.0669	0.491799	0.353301	0	1	1
WBGene00000655	col-79	protein_coding	II	10703618	Putative cuticle collagen 79	7.41364	-0.0958583	0.539909	0	1	1
WBGene00000656	col-80	protein_coding	II	10707203	Putative cuticle collagen 80	13855	0.347581	0.152854	0	1	1
WBGene00000658	col-83	protein_coding	II	11044135	COLlagen	7.25124	-1.27598	0.555359	-1.01494	0.310133	1
WBGene00000659	col-84	protein_coding	II	11868535	COLlagen	5.57575	-0.374266	0.590508	0	1	1
WBGene00000661	col-86	protein_coding	II	13096009	COLlagen	9.58885	0.295414	0.516584	0	1	1
WBGene00000664	col-89	protein_coding	III	4748180	COLlagen	13.2686	0.209158	0.454229	0	1	1
WBGene00000666	col-91	protein_coding	III	8262361	Putative cuticle collagen 91	23.825	-1.08207	0.332233	-0.338551	0.734948	1
WBGene00000668	col-93	protein_coding	III	10984555	COLlagen	9780.55	1.13704	0.195474	0.818898	0.412845	1
WBGene00000669	col-94	protein_coding	III	10986826	COLlagen	3803.99	0.397918	0.122426	0	1	1
WBGene00000670	col-95	protein_coding	III	11703979	COLlagen	13450.5	-0.514539	0.142297	0	1	1
WBGene00000671	col-96	protein_coding	III	11705713	COLlagen	284.841	0.460475	0.166942	0	1	1
WBGene00000672	col-97	protein_coding	III	12992402	COLlagen	33.6789	0.411369	0.380761	0	1	1
WBGene00000673	col-98	protein_coding	III	13018935	COLlagen	4525.49	0.497075	0.139546	0	1	1
WBGene00000674	col-99	protein_coding	IV	138461	Putative cuticle collagen 99	58.7753	-0.866077	0.275989	0	1	1
WBGene00000675	col-101	protein_coding	IV	325436	COLlagen	25249.2	0.00599174	0.110744	0	1	1
WBGene00000677	col-103	protein_coding	IV	762412	COLlagen	3898.13	0.527346	0.135873	0	1	1
WBGene00000678	col-104	protein_coding	IV	1353679	COLlagen	22.4003	0.490088	0.372201	0	1	1
WBGene00000680	col-106	protein_coding	IV	1459863	COLlagen	13789.8	0.26564	0.141532	0	1	1
WBGene00000683	col-109	protein_coding	IV	1817045	COLlagen	19.1822	-0.259315	0.42406	0	1	1
WBGene00000684	col-110	protein_coding	IV	4608210	COLlagen	11.7745	0.852476	0.491629	0.0725774	0.942142	1
WBGene00000687	col-113	protein_coding	IV	7150665	COLlagen	47.8787	0.38465	0.306112	0	1	1
WBGene00000689	col-115	protein_coding	IV	7988688	COLlagen	6.38422	-1.0137	0.532212	-0.359845	0.718963	1
WBGene00000690	col-116	protein_coding	IV	8356766	COLlagen	88.9918	0.664432	0.219237	0	1	1
WBGene00000691	col-117	protein_coding	IV	8822965	COLlagen	910.881	-0.793042	0.64703	-0.26569	0.790478	1
WBGene00000692	col-118	protein_coding	IV	8848182	COLlagen	497.207	-0.382086	0.131831	0	1	1
WBGene00000693	col-119	protein_coding	IV	8978823	COLlagen	36724.5	0.54565	0.143768	0	1	1
WBGene00000694	col-120	protein_coding	IV	9260610	COLlagen	7.83897	1.15595	0.510582	0.67911	0.497068	1
WBGene00000695	col-121	protein_coding	IV	9394934	COLlagen	5.74569	1.63913	0.616551	1.43435	0.151472	1
WBGene00000696	col-122	protein_coding	IV	9563360	COLlagen	28684.4	0.144505	0.118572	0	1	1
WBGene00000697	col-123	protein_coding	IV	9821895	COLlagen	5.81493	0.98343	0.529109	0.339556	0.734191	1
WBGene00000698	col-124	protein_coding	IV	10216450	COLlagen	13743.4	1.2155	0.151807	1.51059	0.130893	1
WBGene00000706	col-132	protein_coding	IV	13089578	COLlagen	6.74608	0.76928	0.530613	0	1	1
WBGene00000708	col-135	protein_coding	IV	15129662	COLlagen	984.428	-0.381487	0.130457	0	1	1
WBGene00000713	col-140	protein_coding	V	5835853	COLlagen	32115	0.504402	0.12945	0	1	1
WBGene00000714	col-141	protein_coding	V	6829704	COLlagen	14.1365	0.953932	0.400514	0.138313	0.889993	1
WBGene00000715	col-142	protein_coding	V	6831163	COLlagen	1476.08	1.18349	0.150656	1.30894	0.190555	1
WBGene00000716	col-143	protein_coding	V	6835635	COLlagen	17154	0.00855968	0.12864	0	1	1
WBGene00000717	col-144	protein_coding	V	9159642	COLlagen	878.394	-1.13736	0.131888	-1.11361	0.265445	1
WBGene00000718	col-145	protein_coding	V	9162051	Putative cuticle collagen 145	8.57242	-0.420489	0.549949	0	1	1
WBGene00000719	col-146	protein_coding	V	9629943	COLlagen	30.272	0.577126	0.344623	0	1	1
WBGene00000723	col-150	protein_coding	V	10293565	COLlagen	23.236	-0.472796	0.390225	0	1	1
WBGene00000727	col-154	protein_coding	V	11385360	COLlagen	31.8041	-1.45143	0.349953	-1.42747	0.153444	1
WBGene00000728	col-155	protein_coding	V	11388890	Putative cuticle collagen 155	983.346	0.993283	0.106605	0.000566442	0.999548	1
WBGene00000730	col-157	protein_coding	V	11484054	COLlagen	12.2726	-1.46583	0.435542	-1.23164	0.218084	1
WBGene00000732	col-159	protein_coding	V	13198230	COLlagen	346.408	1.27165	0.209893	1.42189	0.155058	1
WBGene00000733	col-160	protein_coding	V	13200982	COLlagen	10671.7	0.483493	0.137881	0	1	1
WBGene00000734	col-161	protein_coding	V	13317032	COLlagen	26.1573	-1.15189	0.312237	-0.583137	0.559801	1
WBGene00000735	col-162	protein_coding	V	13441967	COLlagen	24.779	-0.0132987	0.409444	0	1	1
WBGene00000747	col-174	protein_coding	X	7546842	COLlagen	3.4703	-1.40799	0.615531	-0.87209	0.383159	1
WBGene00000750	col-177	protein_coding	X	10999742	COLlagen	6.35851	-0.350125	0.624379	-0.0635895	0.949297	1
WBGene00000751	col-178	protein_coding	X	11199455	COLlagen	18226	0.385404	0.132864	0	1	1
WBGene00000753	col-180	protein_coding	X	11711311	COLlagen	28.1808	-1.56018	0.393934	-1.53946	0.123691	1
WBGene00000754	col-181	protein_coding	X	12104930	COLlagen	24864.2	0.3008	0.127309	0	1	1
WBGene00000755	col-182	protein_coding	X	12636153	COLlagen	3.22264	0.211331	0.648653	0	1	1
WBGene00000757	col-184	protein_coding	X	13469388	COLlagen	14825.4	0.286228	0.110226	0	1	1
WBGene00000759	col-186	protein_coding	X	15952374	COLlagen	12.4979	-1.05873	0.472005	-0.417496	0.676316	1
WBGene00000760	col-187	protein_coding	X	16072903	COLlagen	3.71678	-0.737974	0.596065	0	1	1
WBGene00000761	coq-1	protein_coding	I	5412842	COenzyme Q (ubiquinone) biosynthesis	1281.54	0.301182	0.100833	0	1	1
WBGene00000762	coq-2	protein_coding	III	6935967	4-hydroxybenzoate polyprenyltransferase, mitochondrial	1096.18	0.133924	0.0837449	0	1	1
WBGene00000763	coq-3	protein_coding	IV	14793119	COenzyme Q (ubiquinone) biosynthesis	463.827	-0.0456918	0.129811	0	1	1
WBGene00000764	coq-4	protein_coding	I	3869219	Ubiquinone biosynthesis protein coq-4, mitochondrial	536.392	0.0692556	0.122576	0	1	1
WBGene00000765	coq-5	protein_coding	III	7857309	2-methoxy-6-polyprenyl-1,4-benzoquinol methylase, mitochondrial	2018.58	0.0783648	0.103024	0	1	1
WBGene00000766	coq-6	protein_coding	V	9336762	Ubiquinone biosynthesis monooxygenase COQ6, mitochondrial	998.094	-0.0311719	0.0914272	0	1	1
WBGene00000767	coq-8	protein_coding	III	4863427	Atypical kinase coq-8, mitochondrial	2371.03	0.0218889	0.0627882	0	1	1
WBGene00000768	cor-1	protein_coding	III	10249130	Coronin-like protein cor-1	251.358	0.357274	0.139656	0	1	1
WBGene00000770	cpb-1	protein_coding	III	9322316	Cytoplasmic polyadenylation element-binding protein 1	1267.35	-0.470623	0.163075	0	1	1
WBGene00000772	cpb-3	protein_coding	I	5788631	Cytoplasmic polyadenylation element-binding protein 3	4539.56	-0.22012	0.109176	0	1	1
WBGene00000773	cpf-1	protein_coding	II	8600351	Cleavage and Polyadenylation Factor	2163.08	-0.0673917	0.0600409	0	1	1
WBGene00000774	cpf-2	protein_coding	III	13266940	Cleavage and Polyadenylation Factor	1071.39	-0.32394	0.111583	0	1	1
WBGene00000775	cpin-1	protein_coding	IV	9451338	CyPIN (guanine aminohydrolase) homolog)	150.328	0.203568	0.160619	0	1	1
WBGene00000776	cpl-1	protein_coding	V	16592571	CathePsin L family	30794.1	0.503587	0.0762349	0	1	1
WBGene00000777	cpn-1	protein_coding	I	8636120	CalPoNin	7481.6	0.110503	0.0710368	0	1	1
WBGene00000778	cpn-2	protein_coding	II	337339	Transgelin	69.0781	-0.279099	0.225072	0	1	1
WBGene00000779	cpn-3	protein_coding	I	3987891	CalPoNin	4567.01	0.737344	0.139347	0	1	1
WBGene00000780	cpn-4	protein_coding	I	10924238	CalPoNin	506.665	0.457907	0.128052	0	1	1
WBGene00000781	cpr-1	protein_coding	V	11975515	Gut-specific cysteine proteinase	2686.86	0.627731	0.18768	0	1	1
WBGene00000784	cpr-4	protein_coding	V	6614674	Cathepsin B-like cysteine proteinase 4	6065.24	-0.446304	0.150138	0	1	1
WBGene00000785	cpr-5	protein_coding	V	1132597	Cathepsin B-like cysteine proteinase 5	7331.41	0.253868	0.191951	0	1	1
WBGene00000786	cpr-6	protein_coding	X	6607203	Cathepsin B-like cysteine proteinase 6	22170.8	0.575174	0.0771632	0	1	1
WBGene00000787	cps-6	protein_coding	I	4446582	Endonuclease G, mitochondrial	1535.06	0.288374	0.0699915	0	1	1
WBGene00000788	cpz-1	protein_coding	I	2686639	CathePsin Z	6108.35	-0.117513	0.126953	0	1	1
WBGene00000789	cpz-2	protein_coding	V	13381189	CathePsin Z	2008.22	0.952755	0.0844485	0	1	1
WBGene00000792	crb-1	protein_coding	X	17402553	Drosophila CRumBs homolog	157.906	0.250072	0.169451	0	1	1
WBGene00000793	crh-1	protein_coding	III	11657738	CREB Homolog	713.514	-0.323594	0.093397	0	1	1
WBGene00000794	crn-1	protein_coding	I	3481987	Flap endonuclease 1	2924.69	-0.22915	0.0748711	0	1	1
WBGene00000795	crn-2	protein_coding	V	5594615	Cell-death-Related Nuclease	648.743	0.0735093	0.091447	0	1	1
WBGene00000796	crn-3	protein_coding	II	10588042	Cell-death-Related Nuclease	3034.5	-0.15393	0.0945736	0	1	1
WBGene00000797	crn-4	protein_coding	X	2255848	Cell death-related nuclease 4	374.062	-0.0185997	0.110624	0	1	1
WBGene00000798	crn-5	protein_coding	II	10592750	Cell-death-Related Nuclease	713.088	-0.0603451	0.104182	0	1	1
WBGene00000800	cars-1	protein_coding	I	2623101	Cysteinyl Amino-acyl tRNA Synthetase	4705.19	-0.101553	0.103881	0	1	1
WBGene00000802	crt-1	protein_coding	V	6098993	Calreticulin	20915.4	0.207162	0.0871581	0	1	1
WBGene00000803	csb-1	protein_coding	X	15861293	human CSB (Cockayne Syndrome B) homolog	371.61	-0.417657	0.186801	0	1	1
WBGene00000804	csc-1	protein_coding	II	13596955	Chromosome segregation and cytokinesis defective protein 1	1442.17	-0.229251	0.0910274	0	1	1
WBGene00000812	csk-1	protein_coding	I	71425	Tyrosine-protein kinase csk-1	1636.04	-0.333964	0.149606	0	1	1
WBGene00000813	csn-1	protein_coding	V	17861370	COP9 signalosome complex subunit 1	2073.37	-0.0934086	0.0644115	0	1	1
WBGene00000814	csn-2	protein_coding	I	6022660	COP9 signalosome complex subunit 2	4049.27	0.00629419	0.099375	0	1	1
WBGene00000815	csn-3	protein_coding	IV	194745	COP9 signalosome complex subunit 3	3290.32	-0.00589703	0.0814011	0	1	1
WBGene00000816	csn-4	protein_coding	IV	1077490	COP9 signalosome complex subunit 4	2285.77	-0.138822	0.0779655	0	1	1
WBGene00000817	csn-5	protein_coding	IV	5649533	COP9 signalosome complex subunit 5	2089.39	-0.00110553	0.0667979	0	1	1
WBGene00000818	csn-6	protein_coding	IV	13300828	COP9 signalosome complex subunit 6	1797.64	-0.152583	0.0694482	0	1	1
WBGene00000819	csp-1	protein_coding	II	13601204	CaSPase	32.4259	-0.194612	0.301633	0	1	1
WBGene00000820	csp-2	protein_coding	IV	6307739	CaSPase	15.6347	-0.698123	0.443937	0	1	1
WBGene00000822	csq-1	protein_coding	X	14684877	Calsequestrin	2006.96	0.517054	0.101145	0	1	1
WBGene00000829	ctb-1	protein_coding	MtDNA	4504	Cytochrome b	30800.3	0.378925	0.165448	0	1	1
WBGene00000830	ctl-1	protein_coding	II	14303612	Catalase-2	1420.65	0.462194	0.105078	0	1	1
WBGene00000831	ctl-2	protein_coding	II	14299553	Peroxisomal catalase 1	1805.81	0.593233	0.101256	0	1	1
WBGene00000832	ctn-1	protein_coding	I	2606754	alpha-CaTuliN (catenin/vinculin related)	391.48	-0.515455	0.125803	0	1	1
WBGene00000833	cts-1	protein_coding	III	10214814	Probable citrate synthase, mitochondrial	15980	-0.0489565	0.0903557	0	1	1
WBGene00000834	cua-1	protein_coding	III	13439728	CU (copper) ATPase	2496.26	0.0512912	0.101341	0	1	1
WBGene00000835	cuc-1	protein_coding	III	7860466	CU (copper) Chaperonin	1884.15	0.393588	0.147488	0	1	1
WBGene00000836	cul-1	protein_coding	III	10471237	Cullin-1	2704.19	-0.205803	0.10639	0	1	1
WBGene00000837	cul-2	protein_coding	III	13687199	Cullin-2	3617.73	-0.256337	0.135404	0	1	1
WBGene00000838	cul-3	protein_coding	V	177421	Cullin-3	4263.43	-0.261221	0.148179	0	1	1
WBGene00000839	cul-4	protein_coding	II	7302101	Cullin-4	2394.36	-0.0334493	0.0674828	0	1	1
WBGene00000840	cul-5	protein_coding	V	10179535	Cullin-5	1691.81	-0.0771881	0.0913128	0	1	1
WBGene00000843	cup-2	protein_coding	I	10398984	Derlin-1	3264.46	-0.0327153	0.0755319	0	1	1
WBGene00000845	cup-4	protein_coding	III	7866509	Acetylcholine receptor-like protein cup-4	247.6	0.315929	0.146929	0	1	1
WBGene00000846	cup-5	protein_coding	III	7584181	CUP-5L; Uncharacterized protein	2432.53	-0.063792	0.0636075	0	1	1
WBGene00000853	cut-6	protein_coding	III	10911460	CUTiclin	7.38705	-0.369702	0.549037	0	1	1
WBGene00000854	cux-7	protein_coding	III	7518628	Clk-2 Upstream, human gene XE7 related	1492.98	-0.00232337	0.0787061	0	1	1
WBGene00000857	cwn-1	protein_coding	II	130983		193.909	-0.525527	0.142515	0	1	1
WBGene00000858	cwn-2	protein_coding	IV	10067824		64.3432	1.18447	0.238775	0.916292	0.359514	1
WBGene00000862	cwp-4	protein_coding	V	5053619	Coexpressed With Polycystins	6.33036	-0.518471	0.621169	-0.0313758	0.97497	1
WBGene00000863	cya-1	protein_coding	III	9106686	G2/mitotic-specific cyclin-A1	2464.72	-0.18931	0.0867186	0	1	1
WBGene00000864	cya-2	protein_coding	II	2022673	CYclin A	33.6256	-0.0511636	0.335259	0	1	1
WBGene00000865	cyb-1	protein_coding	IV	10735324	G2/mitotic-specific cyclin-B1	5349	-0.617606	0.103025	0	1	1
WBGene00000866	cyb-2.1	protein_coding	IV	10985985	CYclin B	5107.12	-0.0909687	0.0659453	0	1	1
WBGene00000867	cyb-2.2	protein_coding	I	4114734	CYclin B	7763.52	-0.156288	0.0678829	0	1	1
WBGene00000868	cyb-3	protein_coding	V	15395696	G2/mitotic-specific cyclin-B3	11470.9	-0.660361	0.124572	0	1	1
WBGene00000869	cyc-1	protein_coding	I	8022685	CYtochrome C	8453.26	0.196547	0.0559399	0	1	1
WBGene00000870	cyd-1	protein_coding	II	12980591	G1/S-specific cyclin-D	108.354	-1.20093	0.190896	-1.13157	0.257816	1
WBGene00000871	cye-1	protein_coding	I	6780806	G1/S-specific cyclin-E	3313.73	-0.303117	0.111348	0	1	1
WBGene00000872	cyk-1	protein_coding	III	7023642	CYtoKinesis defect	1687.78	-0.283097	0.105625	0	1	1
WBGene00000874	cyk-3	protein_coding	III	6020165	CYtoKinesis defect	2415.48	-0.0838399	0.0889984	0	1	1
WBGene00000875	cyk-4	protein_coding	III	13768541	CYtoKinesis defect	3242.91	-0.647738	0.171236	0	1	1
WBGene00000876	cyl-1	protein_coding	V	11991010	CYclin L	2456.19	-0.128828	0.0816117	0	1	1
WBGene00000877	cyn-1	protein_coding	V	14356076	Peptidyl-prolyl cis-trans isomerase 1	3484.39	0.159466	0.106398	0	1	1
WBGene00000878	cyn-2	protein_coding	III	13692694	Peptidyl-prolyl cis-trans isomerase 2	85.0266	0.632952	0.217827	0	1	1
WBGene00000879	cyn-3	protein_coding	V	15189927	Peptidyl-prolyl cis-trans isomerase 3	7564.01	0.0306106	0.103093	0	1	1
WBGene00000880	cyn-4	protein_coding	II	10870778	Peptidyl-prolyl cis-trans isomerase 4	2021.71	-0.0972489	0.0679095	0	1	1
WBGene00000881	cyn-5	protein_coding	I	15040427	Peptidyl-prolyl cis-trans isomerase 5	7287.18	0.295454	0.079833	0	1	1
WBGene00000882	cyn-6	protein_coding	III	773403	Peptidyl-prolyl cis-trans isomerase 6	346.912	-0.305475	0.12526	0	1	1
WBGene00000883	cyn-7	protein_coding	V	15186582	Peptidyl-prolyl cis-trans isomerase 7	47044.3	-0.0311387	0.0912956	0	1	1
WBGene00000884	cyn-8	protein_coding	X	8911293	Peptidyl-prolyl cis-trans isomerase 8	456.526	-0.375187	0.0996	0	1	1
WBGene00000885	cyn-9	protein_coding	III	3697820	Peptidyl-prolyl cis-trans isomerase 9	1473.02	0.0254316	0.0959009	0	1	1
WBGene00000886	cyn-10	protein_coding	II	6912542	Peptidyl-prolyl cis-trans isomerase 10	1367.94	-0.0695443	0.118819	0	1	1
WBGene00000887	cyn-11	protein_coding	II	8715193	Peptidyl-prolyl cis-trans isomerase 11	916.668	-0.149566	0.125822	0	1	1
WBGene00000888	cyn-12	protein_coding	IV	7132122	CYclophyliN	1592.69	-0.171216	0.116997	0	1	1
WBGene00000889	cyn-13	protein_coding	IV	17111082	CYclophyliN	1941.2	0.130573	0.0777399	0	1	1
WBGene00000890	sig-7	protein_coding	I	8646451		1978.22	-0.0124901	0.0645034	0	1	1
WBGene00000891	cyn-15	protein_coding	I	13566097	CYclophyliN	1767.72	-0.178077	0.0626303	0	1	1
WBGene00000892	cyn-16	protein_coding	II	12028763	CYclophyliN	1066.36	-0.0246329	0.0865048	0	1	1
WBGene00000893	cyn-17	protein_coding	V	5799683	CYclophyliN	4.42384	0.130385	0.638776	0	1	1
WBGene00000894	dab-1	protein_coding	II	8226132	DAB (Drosophila disabled) homolog	6216.23	-0.342261	0.145688	0	1	1
WBGene00000895	dac-1	protein_coding	III	816246	DAChsund transcription factor homolog	18.7367	0.593671	0.390278	0	1	1
WBGene00000896	dad-1	protein_coding	I	6553479	Dolichyl-diphosphooligosaccharide--protein glycosyltransferase subunit dad-1	4041.63	0.00630767	0.11911	0	1	1
WBGene00000897	daf-1	protein_coding	IV	132416	Cell surface receptor daf-1	573.868	-0.339189	0.146974	0	1	1
WBGene00000898	daf-2	protein_coding	III	2995763	Insulin-like receptor Insulin-like receptor subunit alpha Insulin-like receptor subunit beta	2510.87	-0.595083	0.165356	0	1	1
WBGene00000899	daf-3	protein_coding	X	817927	Dwarfin sma	1044.13	0.284021	0.0844008	0	1	1
WBGene00000900	daf-4	protein_coding	III	5625014	Cell surface receptor daf-4	727.143	-0.300895	0.125114	0	1	1
WBGene00000901	daf-5	protein_coding	II	14033233	Abnormal DAuer Formation DAF-5, a Ski oncogene homolog involved in a neuronal TGF beta pathway (71.0 kD) (Daf-5); Uncharacterized protein	750.55	-0.675736	0.121251	0	1	1
WBGene00000903	daf-7	protein_coding	III	811828	Dauer larva development regulatory growth factor daf-7	45.1336	-0.363663	0.392846	0	1	1
WBGene00000904	daf-8	protein_coding	I	8584542	Dwarfin sma	372.935	0.320229	0.10915	0	1	1
WBGene00000905	daf-9	protein_coding	X	6196927	Cytochrome P450 daf-9	48.7362	0.324556	0.291513	0	1	1
WBGene00000906	daf-10	protein_coding	IV	9136933	Intraflagellar transport protein; Uncharacterized protein	20.9282	-0.773417	0.349691	0	1	1
WBGene00000907	daf-11	protein_coding	V	11718089	Receptor-type guanylate cyclase daf-11	7.44817	0.377512	0.533749	0	1	1
WBGene00000908	daf-12	protein_coding	X	10644407	Nuclear hormone receptor family member daf-12	678.907	0.139198	0.0832686	0	1	1
WBGene00000910	daf-14	protein_coding	IV	10250646	Smad protein; Uncharacterized protein	500.541	-0.136831	0.119507	0	1	1
WBGene00000911	daf-15	protein_coding	IV	9386208	DAF-15; Uncharacterized protein	3893.28	-0.208017	0.109247	0	1	1
WBGene00000912	daf-16	protein_coding	I	10750343	Forkhead box protein O	3750.61	0.0683937	0.108223	0	1	1
WBGene00000913	daf-18	protein_coding	IV	419987	DAF-18; DAF-18 protein; PTEN phosphatidylinositol 3' phosphatase homolog DAF-18; Uncharacterized protein	11407.2	-0.441027	0.110465	0	1	1
WBGene00000914	daf-19	protein_coding	II	10157537	RFX-like transcription factor daf-19	379.77	-0.730717	0.162502	0	1	1
[truncated: 16,898 more rows]

## Sheet: lfc >1 up with padj<0.05
List of upregulated genes
id	gene_name	biotype	chromosome	start	description	baseMean	log2FoldChange	lfcSE	stat	pvalue	padj
WBGene00007873	dod-21	protein_coding	IV	12936738	Downstream Of DAF-16 (regulated by DAF-16)	13073.6	10.2676	0.232018	36.5172	5.91148e-292	9.43827e-288
WBGene00017806	F26A1.8	protein_coding	III	4820798		3182.3	8.40341	0.205937	33.4379	3.86243e-245	3.08338e-241
WBGene00003613	nhr-14	protein_coding	X	8473723	Nuclear hormone receptor family member nhr-14	2869.7	3.83109	0.0876641	32.3281	2.81624e-229	1.4988e-225
WBGene00004878	smf-3	protein_coding	IV	2619875	yeast SMF (divalent cation transporter) homolog	14527.3	3.50607	0.0928948	27.0158	9.63138e-161	3.84437e-157
WBGene00006628	tsp-2	protein_coding	III	8236917	TetraSPanin family	1622.87	4.05962	0.115567	26.4298	6.23381e-154	1.99058e-150
WBGene00012961	Y47H10A.5	protein_coding	I	12095735		2548.09	4.05691	0.118938	25.6967	1.27122e-145	3.38271e-142
WBGene00006627	tsp-1	protein_coding	III	8237995	Tetraspanin-1	2865.26	3.51204	0.10657	23.5894	4.94616e-123	1.12815e-119
WBGene00011844	T19C9.8	protein_coding	V	17239097		1591.21	5.58265	0.199578	22.6607	1.09522e-113	2.18579e-110
WBGene00008199	C49C3.9	protein_coding	IV	17339656		2873.28	2.90321	0.0849444	22.4504	1.26757e-111	2.24867e-108
WBGene00007097	B0024.4	protein_coding	V	10297399		5812.26	7.43889	0.288731	21.8883	3.35944e-106	4.46973e-103
WBGene00009898	dod-23	protein_coding	II	8398160	Downstream Of DAF-16 (regulated by DAF-16)	12919.4	3.13785	0.100628	21.3041	1.04025e-100	1.27759e-97
WBGene00007875	dod-24	protein_coding	IV	12940142	Downstream Of DAF-16 (regulated by DAF-16)	3593.05	3.91007	0.138621	21.0641	1.69996e-98	1.93868e-95
WBGene00045416	Y37H2A.14	protein_coding	V	18143738		3265.21	4.12251	0.148211	21.0062	5.7567e-98	6.12743e-95
WBGene00012683	asp-17	protein_coding	V	19035715	ASpartyl Protease	988.165	6.33801	0.240795	20.6026	2.60205e-94	2.59652e-91
WBGene00022644	dod-19	protein_coding	V	411779	Downstream Of DAF-16 (regulated by DAF-16)	10390.3	3.09027	0.104313	20.1001	7.36884e-90	6.53616e-87
WBGene00007153	clec-41	protein_coding	V	13134965	C-type LECtin	8786.75	3.31972	0.118182	19.6983	2.23135e-86	1.87504e-83
WBGene00015759	C14C6.5	protein_coding	V	536628		1060.81	3.20875	0.119529	18.5322	1.135e-76	9.06068e-74
WBGene00003096	lys-7	protein_coding	V	3481419	LYSozyme	4896.14	3.31827	0.12907	18.0366	1.00476e-72	7.29179e-70
WBGene00045457	F33H12.7	protein_coding	II	2586077		2021.45	3.30384	0.130453	17.7188	3.00217e-70	2.08403e-67
WBGene00194848	T27D12.6	protein_coding	II	11835586		419.481	5.27063	0.23523	17.3475	2.06117e-67	1.31635e-64
WBGene00018823	F54E2.1	protein_coding	V	2810427		8480.35	2.42135	0.0835864	17.0548	3.22124e-65	1.8368e-62
WBGene00010660	K08D8.6	protein_coding	IV	12887060		5736.34	2.1854	0.0730635	16.2682	1.6597e-59	8.83293e-57
WBGene00008850	F15B9.6	protein_coding	V	13014144		697.98	4.06595	0.187552	16.1816	6.79557e-59	3.49994e-56
WBGene00008602	oac-14	protein_coding	X	10139374	O-ACyltransferase homolog	1819.41	3.6293	0.165133	15.9959	1.3654e-57	6.81248e-55
WBGene00018921	sago-2	protein_coding	I	618207	Piwi-like protein	1177.41	3.02971	0.128843	15.8216	2.2098e-56	1.03769e-53
WBGene00009710	F44G3.10	protein_coding	V	16138761		911.097	4.83497	0.23356	15.8077	2.75346e-56	1.25605e-53
WBGene00016064	acd-1	protein_coding	I	4103713		191.6	4.6339	0.225102	15.7422	7.76619e-56	3.44431e-53
WBGene00010749	K10D11.5	protein_coding	IV	12989685		1248.31	2.81467	0.115956	15.7131	1.23011e-55	5.3081e-53
WBGene00012101	zip-10	protein_coding	V	11650078	bZIP transcription factor family	1161.88	2.57354	0.102288	15.4401	8.79799e-54	3.51172e-51
WBGene00002058	ifd-2	protein_coding	X	813852	Intermediate filament protein ifd-2	1381.43	2.56357	0.105647	14.8602	5.97892e-50	2.16953e-47
WBGene00002271	lec-8	protein_coding	X	9850209	Probable galaptin lec-8	13634	2.17663	0.0816208	14.4647	2.0248e-47	7.02783e-45
WBGene00021872	clec-85	protein_coding	IV	2854346	C-type LECtin	2485.04	2.69244	0.118313	14.3743	7.50694e-47	2.55012e-44
WBGene00013119	Y51H4A.25	protein_coding	IV	16736264		807.503	2.38699	0.097314	14.3058	2.01453e-46	6.70082e-44
WBGene00000783	cpr-3	protein_coding	V	15296834	Cathepsin B-like cysteine proteinase 3	5417.72	2.42396	0.100545	14.2232	6.58188e-46	2.14462e-43
WBGene00020760	T24C4.4	protein_coding	III	872622		1950.94	2.62464	0.115065	14.1886	1.07823e-45	3.44302e-43
WBGene00022645	ZK6.11	protein_coding	V	415713		10145.6	2.85337	0.132703	14.0467	8.07524e-45	2.52803e-42
WBGene00002090	ins-7	protein_coding	IV	9682011	Probable insulin-like peptide beta-type 4	272.233	3.76378	0.198034	13.9459	3.33063e-44	9.84758e-42
WBGene00016004	C18H9.6	protein_coding	II	6700658		2099.11	2.32265	0.0968248	13.7184	7.87359e-43	2.24482e-40
WBGene00011190	swt-6	protein_coding	V	13954277	SWEET sugar transporter family	1678.5	2.80835	0.133752	13.5992	4.05045e-42	1.13455e-39
WBGene00008483	E04D5.4	protein_coding	II	10440286		374.983	4.37265	0.243236	13.5609	6.83063e-42	1.88031e-39
WBGene00019261	H34I24.2	protein_coding	III	2842044		4484.76	2.04065	0.0770306	13.5553	7.37067e-42	1.99458e-39
WBGene00019744	M02H5.8	protein_coding	V	449963		2332.64	2.75029	0.130551	13.4845	1.92858e-41	5.13195e-39
WBGene00004811	skr-5	protein_coding	V	17347906	SKp1 Related (ubiquitin ligase complex component)	261.048	4.11282	0.226431	13.4768	2.14254e-41	5.60782e-39
WBGene00000522	clc-1	protein_coding	X	11047415	CLaudin-like in Caenorhabditis	3346.91	2.40092	0.105659	13.3235	1.69022e-40	4.35258e-38
WBGene00009488	oac-20	protein_coding	V	15978716	O-ACyltransferase homolog	866.094	3.04179	0.155548	13.2106	7.62339e-40	1.9018e-37
WBGene00005003	spp-18	protein_coding	IV	9593693	SaPosin-like Protein family	1162.47	2.57813	0.130553	12.1597	5.09192e-34	1.14504e-31
WBGene00010605	K06G5.1	protein_coding	X	14214939		10782.9	1.70247	0.0592757	11.8863	1.3937e-32	3.00701e-30
WBGene00007872	C32H11.9	protein_coding	IV	12935051	Downstream Of DAF-16 (Regulated by DAF-16)	6688.36	9.98805	0.470365	11.6322	2.8278e-31	5.9406e-29
WBGene00001770	gst-22	protein_coding	V	16231034	Glutathione S-Transferase	1245.28	2.3485	0.116659	11.6294	2.91991e-31	6.05444e-29
WBGene00206354	F27E5.9	protein_coding	II	10134938		349.796	2.85097	0.161521	11.5215	1.02844e-30	2.07848e-28
WBGene00009984	F53F1.6	protein_coding	V	13416099		365.824	2.94788	0.170401	11.5048	1.24767e-30	2.49003e-28
WBGene00008301	dct-3	protein_coding	V	12441665	DAF-16/FOXO Controlled, germline Tumor affecting	202.17	5.42491	0.329053	11.3757	5.52286e-30	1.07534e-27
WBGene00021518	hpo-6	protein_coding	IV	1562184		3042.4	1.91612	0.0813355	11.314	1.11813e-29	2.10023e-27
WBGene00015216	valv-1	protein_coding	IV	7444634		563.198	2.73988	0.15561	11.265	1.95409e-29	3.62779e-27
WBGene00010747	K10D11.3	protein_coding	IV	12982120		139.583	3.60156	0.230861	11.1637	6.13796e-29	1.11362e-26
WBGene00016450	clec-5	protein_coding	III	4881914	C-type LECtin	760.876	2.50104	0.135497	11.1542	6.8321e-29	1.22563e-26
WBGene00015933	C17H12.8	protein_coding	IV	6818606		2774.8	2.61946	0.147404	11.0762	1.63598e-28	2.87034e-26
WBGene00011262	pho-8	protein_coding	V	11833629	intestinal acid PHOsphatase	77.4864	4.60212	0.313863	11.0217	3.00305e-28	5.2116e-26
WBGene00044206	T26H5.9	protein_coding	V	15444910		729.257	3.56959	0.235827	10.96	5.94887e-28	1.01042e-25
WBGene00021448	Y39D8A.1	protein_coding	V	419687		366.695	2.52565	0.140842	10.8993	1.16117e-27	1.9515e-25
WBGene00003090	lys-1	protein_coding	V	10277827	LYSozyme	25884.5	1.81754	0.0755189	10.8707	1.58913e-27	2.61567e-25
WBGene00008988	F20G2.5	protein_coding	V	13771508		386.401	2.96242	0.18266	10.7832	4.13199e-27	6.73177e-25
WBGene00138721	C54D10.14	protein_coding	V	12437499		178.395	4.4678	0.305293	10.6023	2.90661e-26	4.64069e-24
WBGene00009433	F35E12.9	protein_coding	V	13741321		1867.93	2.19942	0.1141	10.5854	3.48413e-26	5.50769e-24
WBGene00001158	ech-9	protein_coding	IV	10233320	Enoyl-CoA Hydratase	426.584	3.70653	0.257895	10.515	7.36637e-26	1.15305e-23
WBGene00017640	F20D6.11	protein_coding	V	8196770		1673.89	1.82789	0.0796586	10.4424	1.58782e-25	2.39161e-23
WBGene00007913	cyp-36A1	protein_coding	I	8341709	Probable cytochrome P450 CYP36A1	621.044	2.47628	0.144715	10.2852	8.21534e-25	1.2145e-22
WBGene00009393	clec-62	protein_coding	II	12893064	C-type LECtin	1807.86	2.20231	0.119816	10.1061	5.19107e-24	7.46672e-22
WBGene00008677	F11A5.9	protein_coding	V	16214890		3038.09	1.96268	0.0966063	10.0218	1.22239e-23	1.71199e-21
WBGene00017892	F28B4.3	protein_coding	X	3227489		7964.39	1.83616	0.0840314	10.0008	1.51122e-23	2.0981e-21
WBGene00021503	ctsa-2	protein_coding	III	6612523	CaThepSin A homolog	2015.32	1.78109	0.0795396	9.86858	5.69662e-23	7.77369e-21
WBGene00007833	oac-6	protein_coding	V	16302748	O-ACyltransferase homolog	1787.57	2.50541	0.15833	9.6085	7.36141e-22	9.71341e-20
WBGene00013923	ghi-1	protein_coding	II	11646747	Glycoprotein Hormone (FLR-2) Interacting protein	208.764	2.75579	0.185491	9.52267	1.68788e-21	2.20891e-19
WBGene00008494	F01D5.3	protein_coding	II	13999158		209.953	2.44288	0.153803	9.45454	3.24455e-21	4.21158e-19
WBGene00009394	clec-63	protein_coding	II	12895638	C-type LECtin	30547.9	2.08396	0.116579	9.36787	7.40141e-21	9.45368e-19
WBGene00015859	C16D9.4	protein_coding	V	8240931		414.555	2.31228	0.143078	9.25398	2.16289e-20	2.69787e-18
WBGene00044469	clec-173	protein_coding	IV	3266203	C-type LECtin	619.782	1.9761	0.106767	9.20651	3.36888e-20	4.1375e-18
WBGene00008492	F01D5.1	protein_coding	II	13996954		335.613	2.72212	0.189993	9.15956	5.21111e-20	6.25568e-18
WBGene00019682	K12H4.7	protein_coding	III	8048424	Putative serine protease K12H4.7	11903.3	1.74381	0.0829346	9.0177	1.92079e-19	2.25495e-17
WBGene00009971	F53C11.1	protein_coding	V	13775751		2118.07	1.89963	0.100487	9.0146	1.97589e-19	2.3027e-17
WBGene00009192	F27E5.1	protein_coding	II	10139590		2032.47	1.84757	0.0960933	8.87657	6.89547e-19	7.92036e-17
WBGene00018725	kreg-1	protein_coding	X	8709705	Kgb-1(KGB-1) REgulated Genes	574.096	2.57534	0.181398	8.79782	1.39501e-18	1.59091e-16
WBGene00077770	M04D5.3	protein_coding	I	11339778		749.196	1.88893	0.103062	8.68714	3.71684e-18	4.12105e-16
WBGene00010901	M28.10	protein_coding	II	10647516		3635.26	1.68578	0.0804594	8.57133	1.02299e-17	1.11109e-15
WBGene00010256	hrg-3	protein_coding	V	9756467	Heme Responsive Gene	964.222	2.36044	0.161289	8.54518	1.28341e-17	1.37523e-15
WBGene00015602	fbxa-158	protein_coding	II	1619797	F-box A protein	130.332	3.53163	0.292884	8.49015	2.06371e-17	2.19661e-15
WBGene00008621	F09C8.1	protein_coding	X	16159648		1213.44	2.02208	0.122029	8.44349	3.08009e-17	3.25673e-15
WBGene00016218	C29F9.3	protein_coding	III	124778		646.062	1.85311	0.101809	8.44163	3.12948e-17	3.28719e-15
WBGene00012501	Y26D4A.3	protein_coding	I	13072102		115.699	4.16285	0.345109	8.35452	6.57005e-17	6.81152e-15
WBGene00007440	C08E8.4	protein_coding	V	18371846		1332.28	2.51556	0.186675	8.24782	1.61311e-16	1.63006e-14
WBGene00044696	F52E1.14	protein_coding	V	8383922		6719.7	1.86348	0.106166	8.19626	2.47986e-16	2.49015e-14
WBGene00019605	ctsa-1	protein_coding	II	6366991	Uncharacterized serine carboxypeptidase K10B2.2	1484.01	1.77776	0.095675	8.19192	2.57093e-16	2.56547e-14
WBGene00020580	T19D12.5	protein_coding	II	6634915		176.543	2.83132	0.226509	8.15743	3.42236e-16	3.37292e-14
WBGene00000799	crn-6	protein_coding	III	9367243	Cell death-related nuclease 6	273.136	2.10757	0.137064	8.15452	3.50561e-16	3.43378e-14
WBGene00017764	F25A2.1	protein_coding	V	1179604		105.573	3.43045	0.293734	8.1336	4.16723e-16	4.00807e-14
WBGene00010750	K10D11.6	protein_coding	IV	12986751		143.597	2.60842	0.201589	8.06328	7.42729e-16	7.10085e-14
WBGene00019660	K11H12.4	protein_coding	IV	674038		2132.05	1.82987	0.10385	8.05734	7.79756e-16	7.41046e-14
WBGene00010977	R02D5.3	protein_coding	V	14483160		437.595	2.01597	0.127352	8.05404	8.01027e-16	7.56757e-14
WBGene00001786	gst-38	protein_coding	V	15915168	Glutathione S-Transferase	262.189	2.12659	0.142126	8.00287	1.2155e-15	1.14157e-13
WBGene00020579	T19D12.4	protein_coding	II	6631154		9824.31	1.54735	0.0692101	7.95048	1.85787e-15	1.72458e-13
WBGene00009682	msd-2	protein_coding	IV	10029056	Major Sperm protein Domain containing	118.473	3.61486	0.319882	7.94923	1.87681e-15	1.73209e-13
WBGene00045400	C54D10.13	protein_coding	V	12431368		204.457	2.36109	0.173609	7.93369	2.12722e-15	1.9519e-13
WBGene00020981	W03D2.6	protein_coding	IV	4057300		212.006	2.37124	0.174818	7.93149	2.16537e-15	1.97556e-13
WBGene00016219	C29F9.4	protein_coding	III	120492		696.721	1.89861	0.114668	7.90655	2.64615e-15	2.40048e-13
WBGene00012910	Y46G5A.20	protein_coding	II	12811037		185.592	2.53217	0.197009	7.87235	3.48049e-15	3.13952e-13
WBGene00016190	C28G1.5	protein_coding	X	8826632		1006.83	1.75545	0.097235	7.82868	4.93035e-15	4.42236e-13
WBGene00016425	C34H4.2	protein_coding	IV	1553790		2749.55	1.76403	0.0985112	7.81831	5.35376e-15	4.74879e-13
WBGene00020954	W02G9.4	protein_coding	V	2666866		506.901	2.07084	0.139143	7.78013	7.24522e-15	6.32116e-13
WBGene00044280	W02A2.9	protein_coding	IV	13347687		540.971	2.12302	0.147735	7.70178	1.34186e-14	1.15806e-12
WBGene00044212	Y68A4A.13	protein_coding	V	17207210		145.767	4.63484	0.386223	7.69841	1.37765e-14	1.18255e-12
WBGene00009431	dct-17	protein_coding	V	13727761	DAF-16/FOXO Controlled, germline Tumor affecting	1146.41	2.01325	0.133221	7.68778	1.49709e-14	1.27821e-12
WBGene00007932	zip-5	protein_coding	V	13264546	bZIP transcription factor family	1308.81	1.99859	0.13157	7.673	1.68021e-14	1.41938e-12
WBGene00021121	W09G12.7	protein_coding	IV	1229080		1654.09	2.19212	0.158721	7.63882	2.19219e-14	1.83249e-12
WBGene00021487	comt-3	protein_coding	V	2057629	Catechol-O-MethylTransferase family	2166.39	1.87138	0.115679	7.61092	2.72159e-14	2.26318e-12
WBGene00011979	T24B8.5	protein_coding	II	9082682		629.371	2.74545	0.23398	7.59814	3.00412e-14	2.48517e-12
WBGene00044468	Y69A2AL.2	protein_coding	IV	2482257	Phospholipase A(2)	2199.45	1.8635	0.114837	7.5887	3.23121e-14	2.65925e-12
WBGene00004058	pmp-1	protein_coding	II	6880701	Peroxisomal Membrane Protein related	966.387	1.80649	0.107734	7.54804	4.4185e-14	3.59927e-12
WBGene00022751	ZK484.5	protein_coding	I	6087369		132.899	3.31489	0.309945	7.49292	6.73566e-14	5.41085e-12
WBGene00011176	R09E10.6	protein_coding	IV	10293008		276.633	2.94944	0.267126	7.41261	1.23841e-13	9.88625e-12
WBGene00006051	ssq-2	protein_coding	IV	4996142	Sperm-Specific family, class Q	182.865	3.22266	0.301303	7.40209	1.34053e-13	1.06482e-11
WBGene00011167	chil-23	protein_coding	II	9466905	CHItinase-Like	88.7482	2.42057	0.193974	7.39608	1.40262e-13	1.10862e-11
WBGene00007368	C06B8.2	protein_coding	V	15476064		304.291	2.22772	0.168517	7.38511	1.52327e-13	1.19806e-11
WBGene00013559	Y75B8A.28	protein_coding	III	12319108		882.486	1.89938	0.123593	7.35274	1.94183e-13	1.51977e-11
WBGene00016063	delm-2	protein_coding	I	4109407	DEgenerin Linked to Mechanosensation	41.404	3.96567	0.380273	7.33899	2.15206e-13	1.67609e-11
WBGene00019914	clec-150	protein_coding	III	1002707	C-type LECtin	2553.99	1.56176	0.0770614	7.33468	2.22245e-13	1.72251e-11
WBGene00020813	T25G12.6	protein_coding	X	17225235		183.197	2.16359	0.161316	7.29869	2.90582e-13	2.24127e-11
WBGene00006470	tag-120	protein_coding	V	9706603		2430.03	1.59455	0.0820855	7.29305	3.03006e-13	2.32586e-11
WBGene00021339	Y34F4.4	protein_coding	III	1023283		283.183	2.06769	0.148472	7.28291	3.26685e-13	2.49562e-11
WBGene00010128	F55G11.8	protein_coding	IV	12962808		525.477	1.95555	0.132908	7.26881	3.6267e-13	2.75733e-11
WBGene00016752	C48E7.7	protein_coding	I	6234719		172.195	3.34106	0.327983	7.24252	4.40428e-13	3.31692e-11
WBGene00003463	msp-76	protein_coding	IV	9688982	Major sperm protein 10/36/56/76	149.839	3.16099	0.300295	7.22725	4.92883e-13	3.67728e-11
WBGene00006056	sss-1	protein_coding	IV	9892739	Sperm-Specific family, class S	131.375	3.08794	0.289484	7.22029	5.1878e-13	3.83973e-11
WBGene00011856	T20D3.2	protein_coding	IV	9328739		8698.64	1.56149	0.0783231	7.21543	5.37626e-13	3.95564e-11
WBGene00014136	ZK896.5	protein_coding	IV	12876984		318.272	2.27814	0.179732	7.212	5.51359e-13	4.03807e-11
WBGene00018984	F56F10.1	protein_coding	X	872517	Putative serine protease F56F10.1	2679.78	1.61003	0.0860616	7.13939	9.37448e-13	6.77253e-11
WBGene00021354	fpn-1.1	protein_coding	I	2113655	FerroPortiN	1878.4	1.76983	0.108882	7.13639	9.58115e-13	6.83569e-11
WBGene00015280	C01B10.6	protein_coding	IV	6640161		4338.84	1.69144	0.0982863	7.09363	1.30636e-12	9.1585e-11
WBGene00010050	F54D5.4	protein_coding	II	11569818		4307.42	1.73424	0.104534	7.08573	1.38316e-12	9.64347e-11
WBGene00008495	F01D5.5	protein_coding	II	14001686		135.599	2.78899	0.256229	7.06818	1.56974e-12	1.08967e-10
WBGene00006038	ssp-9	protein_coding	IV	4994325	Sperm-specific class P protein 9/11	118.81	3.66399	0.367807	7.06527	1.60299e-12	1.10794e-10
WBGene00020080	math-37	protein_coding	II	2117059	MATH (meprin-associated Traf homology) domain containing	149.26	2.64234	0.236156	7.04974	1.79257e-12	1.22833e-10
WBGene00008486	ugt-44	protein_coding	IV	10469763	UDP-GlucuronosylTransferase	4234.29	1.93452	0.134674	7.02018	2.21582e-12	1.50544e-10
WBGene00003097	lys-8	protein_coding	II	5586165	LYSozyme	5361.15	1.57865	0.0833931	6.98814	2.78545e-12	1.88443e-10
WBGene00010692	K08H2.5	protein_coding	X	13241109		91.254	3.04918	0.296593	6.97124	3.14167e-12	2.11645e-10
WBGene00019746	M03A1.3	protein_coding	II	4557787		5894.64	1.84933	0.1242	6.95326	3.56937e-12	2.39448e-10
WBGene00023492	T24D3.2	protein_coding	X	12425801		139.849	2.38477	0.202385	6.94602	3.75728e-12	2.49953e-10
WBGene00003464	msp-77	protein_coding	IV	9894596	Major sperm protein 77/79	124.726	3.20439	0.31665	6.9136	4.72499e-12	3.13026e-10
WBGene00003470	msp-152	protein_coding	II	4932993	Major sperm protein 152	79.8298	3.45777	0.350288	6.90702	4.94952e-12	3.26546e-10
WBGene00017308	F09F9.3	protein_coding	X	4119526		92.5376	3.53812	0.353978	6.88569	5.75064e-12	3.77839e-10
WBGene00008741	F13D12.6	protein_coding	II	11739456	Uncharacterized serine carboxypeptidase F13S12.6	4738.93	1.66176	0.0974264	6.85084	7.34173e-12	4.78441e-10
WBGene00009681	gipc-2	protein_coding	IV	10026411	GIPC (RGS-GAIP Interacting Protein C) homolog	232.358	2.60718	0.2395	6.84516	7.63907e-12	4.95794e-10
WBGene00014106	ZK856.5	protein_coding	V	10186007		365.883	1.84218	0.124819	6.81873	9.18514e-12	5.9133e-10
WBGene00016440	gipc-1	protein_coding	III	4870778	GIPC (RGS-GAIP Interacting Protein C) homolog	170.489	2.88801	0.282144	6.80902	9.82651e-12	6.2756e-10
WBGene00000712	col-139	protein_coding	V	4652382	COLlagen	975.024	3.29772	0.351406	6.77447	1.24866e-11	7.87987e-10
WBGene00009684	msd-3	protein_coding	IV	10035638	Major Sperm protein Domain containing	98.2272	3.07309	0.308457	6.7704	1.28424e-11	8.07252e-10
WBGene00008831	F14H3.12	protein_coding	V	16074113		227.249	1.98273	0.147027	6.7676	1.30937e-11	8.19822e-10
WBGene00000703	col-129	protein_coding	IV	12108671	COLlagen	1127.14	3.43076	0.373478	6.74975	1.48104e-11	9.23685e-10
WBGene00008698	F11D11.3	protein_coding	V	18757916		118.04	3.4629	0.364227	6.73816	1.60399e-11	9.96474e-10
WBGene00019213	H20E11.1	protein_coding	IV	6830227		1211.96	1.7634	0.114793	6.72208	1.79144e-11	1.10861e-09
WBGene00012323	oac-54	protein_coding	II	9158108	O-ACyltransferase homolog	275.611	2.04245	0.157919	6.70288	2.04349e-11	1.25486e-09
WBGene00010684	K08F9.1	protein_coding	V	15137273		97.6902	2.56644	0.239137	6.6687	2.58088e-11	1.57879e-09
WBGene00005616	srj-29	protein_coding	V	16075659	Serpentine Receptor, class J	46.6718	3.50268	0.366904	6.65887	2.75935e-11	1.68152e-09
WBGene00020325	bath-46	protein_coding	II	1598029	BTB and MATH domain containing	100.566	2.66908	0.254501	6.6483	2.96506e-11	1.80001e-09
WBGene00016351	C33F10.1	protein_coding	II	4835029		116.007	3.01698	0.30521	6.63889	3.16059e-11	1.91144e-09
WBGene00002274	lec-11	protein_coding	IV	6588190	Galectin	2588.32	1.59498	0.0904828	6.63334	3.28165e-11	1.97716e-09
WBGene00010041	F54C9.3	protein_coding	II	8566520		2717.25	1.73577	0.112281	6.62021	3.58693e-11	2.15297e-09
WBGene00014132	ZK896.1	protein_coding	IV	12872829		241.666	2.17817	0.182222	6.57047	5.01552e-11	2.97687e-09
WBGene00012782	Y43C5A.2	protein_coding	IV	10269883		2427.28	1.50132	0.0770146	6.55531	5.55251e-11	3.27127e-09
WBGene00019931	R07C12.1	protein_coding	IV	4152547		35.5142	3.40337	0.3593	6.54674	5.88068e-11	3.45187e-09
WBGene00022754	nspd-1	protein_coding	I	6097496	Nematode Specific Peptide family, group D	82.0988	3.147	0.32648	6.52214	6.93109e-11	4.05354e-09
WBGene00010473	hrg-2	protein_coding	V	12409369	Heme Responsive Gene	677.804	2.12785	0.176382	6.50851	7.5898e-11	4.4065e-09
WBGene00235133	T26H5.14	protein_coding	V	15449165		77.2782	3.50094	0.366192	6.49304	8.41186e-11	4.84851e-09
WBGene00021590	Y46D2A.2	protein_coding	II	3321060		1316.77	1.55166	0.0864372	6.43517	1.23335e-10	7.08331e-09
WBGene00009957	F53B2.8	protein_coding	IV	12526247		3635.63	1.59612	0.0935445	6.4307	1.27021e-10	7.26889e-09
WBGene00219216	K08D10.14	protein_coding	IV	4155273		68.1483	2.51982	0.240243	6.41805	1.38028e-10	7.87056e-09
WBGene00014252	ZK1320.2	protein_coding	II	9657876		3177.61	1.54957	0.086369	6.41405	1.41699e-10	8.05113e-09
WBGene00000657	col-81	protein_coding	II	11012395	COLlagen	611.486	3.43149	0.395772	6.41032	1.4521e-10	8.22137e-09
WBGene00012947	Y47H9C.1	protein_coding	I	11830985		142.197	3.70151	0.438907	6.37916	1.78064e-10	1.00458e-08
WBGene00018910	F56A4.2	protein_coding	V	2459637	C-type LECtin	74198.7	1.73473	0.116668	6.36764	1.91956e-10	1.07915e-08
WBGene00014135	ZK896.4	protein_coding	IV	12880667		496.546	1.70095	0.11144	6.35793	2.04493e-10	1.14559e-08
WBGene00016281	C31B8.4	protein_coding	V	2896637		66.01	3.473	0.37892	6.34442	2.23269e-10	1.24206e-08
WBGene00000212	asm-2	protein_coding	X	11321077	Sphingomyelin phosphodiesterase 2	340.791	1.73955	0.11787	6.34368	2.24338e-10	1.24367e-08
WBGene00012253	clec-50	protein_coding	V	19752401	C-type LECtin	7684.12	1.50757	0.08073	6.33488	2.37528e-10	1.30771e-08
WBGene00017751	F23F12.3	protein_coding	III	6500543		113.663	2.13748	0.181935	6.33406	2.38795e-10	1.31017e-08
WBGene00018874	tag-234	protein_coding	II	5864195		1239.62	1.61228	0.0976271	6.33135	2.43028e-10	1.32883e-08
WBGene00015599	fbxa-164	protein_coding	II	1612788	F-box A protein	45.1198	3.52979	0.389122	6.32395	2.54966e-10	1.38935e-08
WBGene00007308	C04G2.9	protein_coding	IV	10112891		151.595	2.81325	0.294351	6.30503	2.88135e-10	1.56475e-08
WBGene00011166	chil-22	protein_coding	II	9464474	CHItinase-Like	218.224	2.12299	0.181433	6.29742	3.02641e-10	1.63795e-08
WBGene00044284	spp-21	protein_coding	X	11490130	SaPosin-like Protein family	37.1978	5.25842	0.509913	6.28543	3.26938e-10	1.76348e-08
WBGene00015688	C10G11.8	protein_coding	I	6271981		134.224	2.89167	0.310412	6.19901	5.6818e-10	3.04415e-08
WBGene00018997	F57B9.3	protein_coding	III	6939888		215.091	2.81473	0.296447	6.18648	6.15209e-10	3.27414e-08
WBGene00021540	Y42H9AR.5	protein_coding	IV	8102516		87.0281	2.52055	0.250268	6.17995	6.41226e-10	3.40127e-08
WBGene00022891	ZK1290.10	protein_coding	II	7551943		167.199	2.6003	0.264856	6.16801	6.91556e-10	3.65609e-08
WBGene00023483	Y75B8A.39	protein_coding	III	12313287		117.305	3.11664	0.34088	6.16346	7.11718e-10	3.75026e-08
WBGene00017417	F13B6.2	protein_coding	IV	7458918		635.545	1.7971	0.132448	6.0969	1.08142e-09	5.64249e-08
WBGene00019430	K06A5.2	protein_coding	I	6468129		126.07	2.72675	0.287942	6.09513	1.09351e-09	5.68696e-08
WBGene00017592	F19C7.2	protein_coding	IV	4599954		596.558	1.80699	0.13477	6.06829	1.29281e-09	6.65838e-08
WBGene00194703	F26B1.8	protein_coding	I	6329536		99.7686	3.00025	0.331464	6.06248	1.34039e-09	6.88127e-08
WBGene00016447	msd-4	protein_coding	III	4868334	Major Sperm protein Domain containing	112.623	3.01225	0.34015	6.06074	1.35494e-09	6.93365e-08
WBGene00020990	W03D8.9	protein_coding	I	2784617		84.6462	3.44832	0.390414	6.04022	1.53904e-09	7.82559e-08
WBGene00019058	F58F9.4	protein_coding	IV	6231044		121.216	2.05117	0.177439	6.01679	1.77915e-09	8.96085e-08
WBGene00003091	lys-2	protein_coding	V	10280310	LYSozyme	14239	1.49635	0.0835698	5.9894	2.10623e-09	1.05748e-07
WBGene00000528	clh-1	protein_coding	II	11846508	Chloride channel protein	1659.76	1.54063	0.0911466	5.98658	2.14295e-09	1.07255e-07
WBGene00004796	sid-2	protein_coding	III	13679445	Systemic RNA interference defective protein 2	657.992	1.58764	0.0995239	5.96529	2.44207e-09	1.21844e-07
WBGene00009914	F49H6.13	protein_coding	V	17008673		75.7315	3.73175	0.410623	5.96286	2.47859e-09	1.23281e-07
WBGene00235306	W03D2.13	protein_coding	IV	4056520		215.983	1.93559	0.159664	5.95073	2.66948e-09	1.32363e-07
WBGene00003467	msp-81	protein_coding	IV	9835997	Major sperm protein 19/31/40/45/50/51/53/59/61/65/81/113/142	118.177	2.75051	0.305696	5.86185	4.57727e-09	2.23488e-07
WBGene00006429	arrd-3	protein_coding	II	9412480	ARRestin Domain protein	30.3698	3.19159	0.36958	5.84379	5.10263e-09	2.4838e-07
WBGene00003435	msp-40	protein_coding	II	4825380	Major sperm protein 19/31/40/45/50/51/53/59/61/65/81/113/142	138.078	2.81207	0.316222	5.83783	5.28851e-09	2.56645e-07
WBGene00013037	Y49E10.18	protein_coding	III	12442636		789.62	1.86726	0.151096	5.82671	5.65301e-09	2.73503e-07
WBGene00016912	clec-86	protein_coding	X	7139901	C-type LECtin	65.6825	2.6142	0.283737	5.82056	5.86505e-09	2.82904e-07
WBGene00011517	cgt-1	protein_coding	V	15886724	Ceramide glucosyltransferase 1	356.853	1.81432	0.143185	5.78042	7.45137e-09	3.58339e-07
WBGene00003451	msp-58	protein_coding	IV	5308593	Major Sperm Protein	146.116	2.59106	0.282961	5.77955	7.48988e-09	3.5911e-07
WBGene00021379	Y37E11B.7	protein_coding	IV	3599523		119.167	2.20167	0.212991	5.75223	8.80746e-09	4.21017e-07
WBGene00016717	math-22	protein_coding	II	1905429	MATH (meprin-associated Traf homology) domain containing	482.467	1.84691	0.149879	5.74089	9.41812e-09	4.47529e-07
WBGene00004144	pqn-60	protein_coding	V	504039	Prion-like-(Q/N-rich)-domain-bearing protein	72.0292	2.87372	0.332957	5.69039	1.26748e-08	5.95192e-07
WBGene00015913	C17F4.7	protein_coding	II	3245087		46950.3	1.3932	0.0696208	5.68905	1.2775e-08	5.9814e-07
WBGene00010633	nspd-2	protein_coding	IV	9844029	Nematode Specific Peptide family, group D	92.9826	2.87723	0.339075	5.67896	1.35516e-08	6.32648e-07
WBGene00021517	Y41D4B.15	protein_coding	IV	1564081		114.388	3.03194	0.354702	5.67835	1.35998e-08	6.33045e-07
WBGene00015537	C06E4.8	protein_coding	IV	7284219		94.4123	2.42229	0.257239	5.6671	1.45235e-08	6.74076e-07
WBGene00018645	F49F1.5	protein_coding	IV	4119461		36.2348	3.62623	0.431276	5.66179	1.49804e-08	6.93267e-07
WBGene00015756	C14C6.2	protein_coding	V	563135		352.905	1.98335	0.177131	5.65957	1.5175e-08	7.00242e-07
WBGene00014158	ZK938.1	protein_coding	II	9829418	Serine/threonine-protein phosphatase	110.982	2.86148	0.338429	5.63232	1.77805e-08	8.15757e-07
WBGene00009796	F46G10.1	protein_coding	X	13310050		2204.28	1.56937	0.102421	5.6202	1.90735e-08	8.67601e-07
WBGene00021253	Y22D7AL.15	protein_coding	III	1658248		1476.71	1.58978	0.106255	5.61619	1.95209e-08	8.85429e-07
WBGene00003468	msp-113	protein_coding	IV	5297927	Major sperm protein 19/31/40/45/50/51/53/59/61/65/81/113/142	62.4964	3.37865	0.401266	5.60684	2.06055e-08	9.31974e-07
WBGene00003466	msp-79	protein_coding	IV	9766745	Major sperm protein 77/79	86.2894	3.25517	0.411729	5.57742	2.44115e-08	1.09152e-06
WBGene00021398	Y38C1AA.7	protein_coding	IV	158967		110.398	2.79104	0.329146	5.55564	2.76591e-08	1.2301e-06
WBGene00019957	R08E3.1	protein_coding	X	4825003		4305.59	1.42901	0.0779147	5.55264	2.81385e-08	1.24794e-06
WBGene00004172	pqn-92	protein_coding	III	12307781	Prion-like-(Q/N-rich)-domain-bearing protein	788.216	1.43407	0.0791993	5.52902	3.22016e-08	1.42419e-06
WBGene00194717	ZC239.22	protein_coding	II	3219687		224.008	2.06758	0.199433	5.4925	3.96285e-08	1.73821e-06
WBGene00077593	C49G7.12	protein_coding	V	4038821		330.011	2.04588	0.197818	5.42762	5.71118e-08	2.47113e-06
WBGene00002259	lbp-7	protein_coding	V	13879550	Fatty acid-binding protein homolog 7	1215.23	1.6843	0.12821	5.41565	6.10675e-08	2.63515e-06
WBGene00013654	Y105C5B.15	protein_coding	IV	15951909	Purple acid phosphatase	2174.73	1.39955	0.0745172	5.40515	6.47539e-08	2.7792e-06
WBGene00011214	R10E9.2	protein_coding	III	3962728		96.2196	2.5942	0.304597	5.38711	7.15977e-08	3.05916e-06
WBGene00017703	F22E5.1	protein_coding	II	2675788		225.136	2.35514	0.258852	5.38195	7.36848e-08	3.1372e-06
WBGene00003425	msp-10	protein_coding	IV	9837632	Major sperm protein 10/36/56/76	64.6676	3.70045	0.4653	5.37252	7.76424e-08	3.28817e-06
WBGene00003465	msp-78	protein_coding	IV	9770030	Major sperm protein 78	126.488	2.60245	0.310494	5.33904	9.34385e-08	3.93625e-06
WBGene00005188	srg-31	protein_coding	V	6950835	Serpentine receptor class gamma-31	76.19	2.74942	0.333577	5.33538	9.53454e-08	4.00601e-06
WBGene00007857	C31H5.6	protein_coding	I	9043319		623.991	1.55941	0.106247	5.32656	1.00088e-07	4.19424e-06
WBGene00007694	C23H4.6	protein_coding	X	12235621		462.418	1.71836	0.137836	5.30671	1.11622e-07	4.65314e-06
WBGene00043062	clec-80	protein_coding	IV	2823746	C-type LECtin	530.188	1.71009	0.136653	5.27995	1.29221e-07	5.3588e-06
WBGene00000707	col-133	protein_coding	IV	14098335	COLlagen	30.2322	2.79281	0.343133	5.27883	1.30014e-07	5.37773e-06
WBGene00007190	rmd-3	protein_coding	II	11338450	Regulator of Microtubule Dynamics	58.5125	2.95694	0.36993	5.27806	1.30561e-07	5.38641e-06
WBGene00003443	msp-50	protein_coding	II	5199763	Major sperm protein 19/31/40/45/50/51/53/59/61/65/81/113/142	57.6341	2.8347	0.352932	5.27397	1.33502e-07	5.49354e-06
WBGene00018314	F41H10.1	protein_coding	IV	5382909		72.7824	2.39293	0.271292	5.2696	1.36719e-07	5.61145e-06
WBGene00077673	B0563.10	protein_coding	X	9166748		13.4025	4.2953	0.554214	5.25684	1.46555e-07	5.99975e-06
WBGene00010998	R03G8.3	protein_coding	X	13091131		331.84	1.69708	0.134901	5.25245	1.50087e-07	6.12861e-06
WBGene00003442	msp-49	protein_coding	II	5194332	Major sperm protein 49	42.9849	2.92433	0.370723	5.24708	1.54533e-07	6.29405e-06
WBGene00010769	asah-1	protein_coding	I	12505098	Acid ceramidase	1760.63	1.5634	0.109033	5.23115	1.6846e-07	6.82647e-06
WBGene00003452	msp-59	protein_coding	IV	5312690	Major sperm protein 19/31/40/45/50/51/53/59/61/65/81/113/142	214.761	3.37312	0.531269	5.21144	1.87381e-07	7.55484e-06
WBGene00015932	C17H12.6	protein_coding	IV	6821066		880.215	1.79991	0.157835	5.18455	2.16536e-07	8.70833e-06
WBGene00018232	F40E3.5	protein_coding	I	2645266		54.3172	2.45797	0.288271	5.17271	2.30723e-07	9.2324e-06
WBGene00012959	Y47H10A.3	protein_coding	I	12088120		88.6472	2.90484	0.374301	5.14041	2.74143e-07	1.09424e-05
WBGene00015259	dod-20	protein_coding	V	422498	Downstream Of DAF-16 (regulated by DAF-16)	93.4131	2.83614	0.36133	5.13465	2.82671e-07	1.12547e-05
WBGene00008577	F08G2.5	protein_coding	II	13832853		1047.55	1.62198	0.123318	5.13028	2.89308e-07	1.14903e-05
WBGene00009396	clec-65	protein_coding	II	12901294	C-type LECtin	4822.7	1.44302	0.0872565	5.12894	2.91385e-07	1.1544e-05
WBGene00013608	clec-35	protein_coding	V	16852291	C-type LECtin	16.3047	3.51762	0.461871	5.11044	3.21402e-07	1.26704e-05
WBGene00003431	msp-33	protein_coding	II	4892269	Major sperm protein 33	104.156	2.44882	0.293224	5.10159	3.3682e-07	1.32455e-05
WBGene00008632	fbxa-88	protein_coding	V	16142008	F-box A protein	83.9957	2.10766	0.222861	5.09448	3.49697e-07	1.36845e-05
WBGene00000282	cah-4	protein_coding	X	13542574	Carbonic AnHydrase	6333.7	1.50063	0.0996339	5.08464	3.6833e-07	1.43784e-05
WBGene00016862	C52A10.1	protein_coding	V	5230477	Carboxylic ester hydrolase	1212.35	1.3675	0.0733263	5.05756	4.24649e-07	1.64962e-05
WBGene00010125	dod-22	protein_coding	IV	12965387	Downstream Of DAF-16 (regulated by DAF-16)	276.592	1.79246	0.160798	5.03777	4.70999e-07	1.82523e-05
WBGene00000638	col-62	protein_coding	I	7403341	COLlagen	37.9394	3.00842	0.411957	5.03557	4.76426e-07	1.84179e-05
WBGene00015739	ugt-7	protein_coding	V	4997023	UDP-GlucuronosylTransferase	183.079	1.81116	0.164396	5.0313	4.87164e-07	1.87876e-05
WBGene00009215	thn-2	protein_coding	IV	12383168	THaumatiN family	794.891	1.58923	0.11908	5.01887	5.19777e-07	1.99489e-05
WBGene00019057	F58F9.3	protein_coding	IV	6233253		409.849	1.62373	0.12622	5.01609	5.27334e-07	2.01421e-05
WBGene00014169	ZK945.7	protein_coding	II	10107474		45.4317	3.29567	0.433425	4.9931	5.94171e-07	2.2587e-05
WBGene00021772	math-45	protein_coding	II	1510287	MATH (meprin-associated Traf homology) domain containing	311.149	1.73243	0.149392	4.98721	6.12574e-07	2.32313e-05
WBGene00016658	C45B2.1	protein_coding	X	6086124		518.351	1.87558	0.179752	4.98088	6.32955e-07	2.39473e-05
WBGene00006464	bath-47	protein_coding	II	1601789	BTB and MATH domain-containing protein 47	230.623	1.78859	0.162151	4.96478	6.87779e-07	2.596e-05
WBGene00020350	T08B2.12	protein_coding	I	6231498		88.3033	3.4693	0.546532	4.96277	6.9496e-07	2.61692e-05
WBGene00005548	sri-36	protein_coding	II	2583782	Serpentine Receptor, class I	62.6194	4.08194	0.448236	4.95435	7.25737e-07	2.72638e-05
WBGene00002257	lbp-5	protein_coding	I	6731269	Fatty acid-binding protein homolog 5	1288.51	1.58341	0.120007	4.93259	8.11475e-07	3.02711e-05
WBGene00017386	nspd-5	protein_coding	II	4860063	Nematode Specific Peptide family, group D	54.0474	3.00755	0.416298	4.92185	8.57316e-07	3.19066e-05
WBGene00255375	F08B4.8	protein_coding	IV	8677603		82.9537	2.70695	0.364975	4.88441	1.03738e-06	3.84287e-05
WBGene00003434	msp-38	protein_coding	IV	10143312	Major sperm protein 38	67.4064	2.83836	0.380246	4.88187	1.05083e-06	3.88368e-05
WBGene00002269	lec-6	protein_coding	III	599509	Galectin	18003.4	1.53181	0.11107	4.85449	1.20694e-06	4.45035e-05
WBGene00044381	K10G6.5	protein_coding	II	3987538		34.8671	2.74164	0.369113	4.83608	1.32425e-06	4.87164e-05
WBGene00010124	F55G11.4	protein_coding	IV	12973636		2671.09	1.50522	0.106118	4.82562	1.3957e-06	5.11095e-05
WBGene00009432	cld-9	protein_coding	V	13749185	Cub (CUB) Like Domain containing protein	1322.01	1.60707	0.128521	4.80439	1.55223e-06	5.6582e-05
WBGene00007301	C04F12.7	protein_coding	I	9695708		151.392	2.94769	0.440525	4.7947	1.62914e-06	5.92504e-05
WBGene00044787	C54D10.12	protein_coding	V	12434361		24.7192	3.37329	0.459031	4.7832	1.72527e-06	6.26037e-05
WBGene00015079	B0244.4	protein_coding	III	5747485	Putative G-protein coupled receptor B0244.4	32.3307	2.79479	0.381098	4.7595	1.94073e-06	7.01035e-05
WBGene00020414	T10E9.4	protein_coding	I	6525049		115.381	2.53416	0.336809	4.75565	1.97812e-06	7.12928e-05
WBGene00003653	nhr-63	protein_coding	V	16002595	Nuclear Hormone Receptor family	224.879	1.72155	0.154924	4.75494	1.98503e-06	7.13807e-05
WBGene00008633	fbxa-18	protein_coding	V	16143573	F-box A protein	29.9085	2.72557	0.370804	4.75163	2.01781e-06	7.23964e-05
WBGene00003448	msp-55	protein_coding	IV	5055593	Major sperm protein 55/57	71.7689	2.54237	0.336277	4.74934	2.04082e-06	7.30575e-05
WBGene00044783	T26H5.10	protein_coding	V	15443332		43.0214	3.27614	0.509323	4.72127	2.34378e-06	8.35285e-05
WBGene00018643	drd-50	protein_coding	IV	4117788	dietary restriction down regulated	151.442	2.30026	0.286469	4.71836	2.37749e-06	8.45411e-05
WBGene00018971	clec-67	protein_coding	IV	3922165	C-type LECtin	2116.03	1.75415	0.163657	4.71082	2.4672e-06	8.75364e-05
WBGene00016017	C23G10.11	protein_coding	III	6215165		29.4344	2.76914	0.384594	4.70679	2.51648e-06	8.90867e-05
WBGene00008255	C51E3.10	protein_coding	V	10160437		451.119	1.87157	0.190311	4.69487	2.66771e-06	9.37558e-05
WBGene00008590	F08H9.2	protein_coding	V	14460626		50.2463	2.98028	0.419545	4.69206	2.70471e-06	9.47004e-05
WBGene00006052	ssq-3	protein_coding	IV	7111632	Sperm-Specific family, class Q	84.9281	2.86649	0.414301	4.68983	2.73426e-06	9.55255e-05
WBGene00012087	T27E7.1	protein_coding	IV	14519759		62.6771	2.81192	0.39264	4.68758	2.7646e-06	9.63748e-05
WBGene00194695	B0462.5	protein_coding	V	18322215		181.62	1.79313	0.173416	4.68427	2.80954e-06	9.7728e-05
WBGene00020456	fbxa-60	protein_coding	III	944780	F-box A protein	1516.4	1.44915	0.0975711	4.66281	3.11927e-06	0.000108266
WBGene00008891	clec-42	protein_coding	V	18191443	C-type LECtin	34.5963	3.68233	0.493142	4.64436	3.41134e-06	0.00011789
WBGene00017322	clec-160	protein_coding	III	8272956	C-type lectin domain-containing protein 160	322.689	1.57112	0.125083	4.64103	3.4667e-06	0.000119545
WBGene00017594	F19C7.4	protein_coding	IV	4603107		224.635	1.70946	0.156158	4.6354	3.56243e-06	0.000122373
WBGene00000639	col-63	protein_coding	I	8243693	COLlagen	18.6082	4.09893	0.541883	4.63008	3.65524e-06	0.000125235
WBGene00008194	C49C3.4	protein_coding	IV	17320795		4841.48	1.25347	0.0553109	4.61545	3.92246e-06	0.000134103
WBGene00013900	ugt-18	protein_coding	V	12820265	UDP-glucuronosyltransferase	440.493	2.72126	0.407078	4.60746	4.07616e-06	0.000138763
WBGene00195165	F57G4.11	protein_coding	V	17625127		16.3215	3.55493	0.500567	4.60505	4.12361e-06	0.00014008
WBGene00013837	fbxa-30	protein_coding	III	1274514	F-box A protein	85.3427	2.47954	0.333166	4.60022	4.22048e-06	0.000142763
WBGene00021113	gsp-3	protein_coding	I	4709317	Serine/threonine-protein phosphatase	69.3938	2.95111	0.430171	4.59906	4.24393e-06	0.000143253
WBGene00002273	lec-10	protein_coding	V	6488199	Galectin	6556.35	1.41826	0.0922094	4.59074	4.41675e-06	0.000148772
WBGene00010049	F54D5.3	protein_coding	II	11571805		5132.56	1.42604	0.094557	4.56183	5.07105e-06	0.000170451
WBGene00003092	lys-3	protein_coding	V	10282204	Lysozyme-like protein 3	473.954	1.93205	0.214287	4.52243	6.11342e-06	0.000203772
WBGene00021582	clec-71	protein_coding	IV	3937464	C-type LECtin	19.8131	2.94512	0.432999	4.51436	6.35068e-06	0.0002108
WBGene00016335	gba-1	protein_coding	II	2176892	Putative glucosylceramidase 1	721.524	1.44806	0.10078	4.50664	6.58611e-06	0.00021726
WBGene00077525	C41G7.8	protein_coding	I	9530816		297.537	1.66821	0.151908	4.49657	6.90597e-06	0.000226874
WBGene00006272	str-245	protein_coding	I	14852818	Seven TM Receptor	104.699	1.96022	0.220793	4.48585	7.26228e-06	0.00023809
WBGene00013474	Y69E1A.2	protein_coding	IV	10949817		78.9425	2.35897	0.316437	4.48341	7.34585e-06	0.000240336
WBGene00004020	pho-1	protein_coding	II	5233158	intestinal acid PHOsphatase	2869.9	1.50483	0.114634	4.47146	7.76879e-06	0.000253653
WBGene00043702	Y54G2A.7	protein_coding	IV	2838621		83.0401	2.03429	0.239608	4.45371	8.43997e-06	0.000273887
WBGene00008167	acox-5	protein_coding	III	9586613	Probable peroxisomal acyl-coenzyme A oxidase	1656.47	1.49564	0.113578	4.43122	9.37013e-06	0.000302841
WBGene00002188	kgb-2	protein_coding	IV	3606796	Mitogen-activated protein kinase	181.278	1.71749	0.166176	4.42228	9.76641e-06	0.000315011
WBGene00003640	nhr-50	protein_coding	V	15997779	Nuclear Hormone Receptor family	302.302	1.54393	0.125345	4.41698	1.00088e-05	0.00032218
WBGene00013473	Y69E1A.1	protein_coding	IV	10947232		78.2484	2.48732	0.352076	4.41561	1.00724e-05	0.000323572
WBGene00018562	F47D12.6	protein_coding	III	6286633		276.166	1.60549	0.140545	4.39739	1.09559e-05	0.00035125
WBGene00016058	nspd-3	protein_coding	IV	5162743	Nematode Specific Peptide family, group D	75.9731	2.52723	0.367333	4.38516	1.15903e-05	0.000370102
WBGene00016785	C49G7.7	protein_coding	V	4034476		741.129	1.83731	0.198472	4.35566	1.32668e-05	0.000421108
WBGene00011852	clec-26	protein_coding	V	16848634	C-type LECtin	32.8263	2.43924	0.343218	4.34589	1.38714e-05	0.000438555
WBGene00004965	spe-11	protein_coding	I	5330576	Spermatocyte protein spe-11	42.2014	3.13229	0.460101	4.3427	1.40742e-05	0.000443211
WBGene00020072	R13H9.6	protein_coding	IV	5067364		20.5878	3.06698	0.576954	4.34165	1.41418e-05	0.000444465
WBGene00003438	msp-45	protein_coding	II	5156700	Major sperm protein 19/31/40/45/50/51/53/59/61/65/81/113/142	60.2406	2.58412	0.383821	4.33477	1.45915e-05	0.000456798
WBGene00009347	F32H5.1	protein_coding	V	13356087		1709.1	1.37615	0.0878518	4.33358	1.46703e-05	0.000457063
WBGene00022562	ZC204.12	protein_coding	II	1656263		284.35	1.60008	0.141201	4.33394	1.46466e-05	0.000457063
WBGene00008965	mltn-10	protein_coding	II	14623063	MLt-TeN (mlt-10) related	20.5646	2.5909	0.377478	4.33292	1.47144e-05	0.000457063
WBGene00000748	col-175	protein_coding	X	9233642	COLlagen	16.3661	3.81738	0.525615	4.33316	1.46985e-05	0.000457063
WBGene00012938	Y47D3A.32	protein_coding	III	11252416		101.877	1.88956	0.211497	4.32749	1.50819e-05	0.000467568
WBGene00022490	Y119D3B.13	protein_coding	III	1182002		439.81	1.46631	0.109411	4.3267	1.51357e-05	0.000468325
WBGene00003734	nhx-6	protein_coding	II	1670833	Sodium/hydrogen exchanger	16.2159	3.16868	0.494899	4.32445	1.52913e-05	0.000472225
WBGene00015574	irg-1	protein_coding	V	3523587	Infection Response Gene	245.819	1.77297	0.183947	4.32318	1.53798e-05	0.000474043
WBGene00007072	ugt-1	protein_coding	V	10395677	UDP-GlucuronosylTransferase	238.233	1.62993	0.149165	4.32163	1.54881e-05	0.000476432
WBGene00045067	F07C6.6	protein_coding	IV	12792795		13.1424	3.35313	0.508417	4.31669	1.58388e-05	0.00048538
WBGene00009344	F32H2.7	protein_coding	I	8995578		42.3262	3.02081	0.459017	4.30872	1.642e-05	0.000502225
WBGene00003429	msp-31	protein_coding	II	4916179	Major sperm protein 19/31/40/45/50/51/53/59/61/65/81/113/142	98.9054	2.21512	0.295419	4.30301	1.68491e-05	0.000514365
WBGene00009884	F49C12.15	protein_coding	IV	9324442		216.142	1.85909	0.206673	4.30179	1.69426e-05	0.000516233
WBGene00003432	msp-36	protein_coding	IV	10095400	Major sperm protein 10/36/56/76	139.807	2.81498	0.475537	4.26996	1.9551e-05	0.000590079
WBGene00008477	clec-17	protein_coding	I	12430029	C-type LECtin	152.691	2.18658	0.289674	4.2649	1.99994e-05	0.000602473
WBGene00016541	C39H7.1	protein_coding	IV	5631739		65.9457	2.43226	0.352993	4.26159	2.02974e-05	0.000610297
WBGene00005931	fbxa-199	protein_coding	V	15397385	F-box A protein	31.5653	2.48532	0.36246	4.25743	2.06789e-05	0.000620601
WBGene00015080	B0244.5	protein_coding	III	5744870	Putative G-protein coupled receptor B0244.5	27.5996	2.43841	0.349885	4.25401	2.0998e-05	0.000628995
WBGene00016260	C30F12.1	protein_coding	I	6954411		698.528	1.46686	0.111608	4.24884	2.14882e-05	0.000642473
WBGene00017302	F09F7.5	protein_coding	III	5547068		769.353	1.48928	0.117569	4.23256	2.31048e-05	0.000686509
WBGene00012593	nspe-7	protein_coding	II	12627187	Nematode Specific Peptide family, group E	9.80193	3.49931	0.542324	4.23228	2.3133e-05	0.000686509
WBGene00018951	F56C9.7	protein_coding	III	7313143		3590.53	1.40732	0.0977533	4.22479	2.39163e-05	0.000708437
WBGene00003457	msp-64	protein_coding	II	5809924	Major sperm protein 19/31/40/45/50/51/53/59/61/65/81/113/142	63.1785	2.52062	0.381405	4.22392	2.40086e-05	0.000709854
WBGene00000626	col-49	protein_coding	I	3137188	COLlagen	7.55951	3.36345	0.614297	4.21029	2.5504e-05	0.000749902
WBGene00044492	Y54G2A.49	protein_coding	IV	2851693		58.7973	2.03871	0.255796	4.20886	2.56662e-05	0.000751901
WBGene00020357	T08E11.1	protein_coding	II	1836504		27.4854	2.39678	0.343536	4.20913	2.56354e-05	0.000751901
WBGene00017471	F14H12.3	protein_coding	X	4344251		102.218	2.12375	0.279847	4.19864	2.68524e-05	0.000783777
WBGene00008553	F07C6.2	protein_coding	IV	12791171		57.3122	2.0295	0.254317	4.19026	2.78633e-05	0.000808846
WBGene00006053	ssq-4	protein_coding	IV	5016481	Sperm-Specific family, class Q	312.951	2.71721	0.461097	4.19043	2.78425e-05	0.000808846
WBGene00012308	oac-53	protein_coding	V	16624008	O-ACyltransferase homolog	53.5583	2.3293	0.333424	4.18531	2.84781e-05	0.000823697
WBGene00004993	spp-8	protein_coding	IV	8481664	SaPosin-like Protein family	2094.28	1.35397	0.0856164	4.18463	2.85629e-05	0.000824657
WBGene00015152	B0348.2	protein_coding	V	45463		148.247	2.85079	0.511229	4.17839	2.93575e-05	0.000846067
WBGene00013609	clec-37	protein_coding	V	16850394	C-type LECtin	5.73484	3.36876	0.607069	4.17282	3.00846e-05	0.000865461
WBGene00015081	B0244.6	protein_coding	III	5738008	Putative G-protein coupled receptor-like protein B0244.6	104.031	1.89439	0.222663	4.1501	3.3233e-05	0.000954313
WBGene00021580	clec-174	protein_coding	IV	3940213	C-type LECtin	190.208	3.27964	0.455803	4.1484	3.34807e-05	0.0009597
WBGene00018594	aman-3	protein_coding	I	5324511	Alpha-mannosidase	764.574	1.58147	0.143659	4.14015	3.47082e-05	0.000993103
WBGene00016680	C45G9.9	protein_coding	III	5054605		56.4123	2.66938	0.428987	4.10886	3.97621e-05	0.00113163
WBGene00017553	nep-8	protein_coding	II	3403919	NEPrilysin metallopeptidase family	86.1836	2.46223	0.379599	4.10069	4.1192e-05	0.00116816
WBGene00017681	slc-17.5	protein_coding	V	8282375	SLC (SoLute Carrier) homolog	183.19	1.66974	0.167516	4.09663	4.1921e-05	0.00118672
WBGene00003426	msp-19	protein_coding	IV	5260554	Major sperm protein 19/31/40/45/50/51/53/59/61/65/81/113/142	147.525	2.79353	0.51448	4.08611	4.38674e-05	0.00123962
WBGene00012144	T28H10.3	protein_coding	V	12513021		9373.95	1.31741	0.0789338	4.0684	4.73366e-05	0.00133294
WBGene00009041	cut-3	protein_coding	II	8445165	CUTiclin	24.9937	2.94295	0.493994	4.06629	4.7767e-05	0.00134033
WBGene00009226	cyp-37B1	protein_coding	V	16278191	CYtochrome P450 family	252.547	1.83555	0.212636	4.05952	4.91735e-05	0.00137738
WBGene00010822	M01G12.9	protein_coding	I	12109061		547.667	1.53266	0.13405	4.05511	5.01102e-05	0.0013987
WBGene00013858	ssp-34	protein_coding	IV	10738204	Sperm-specific class P protein 34	29.7783	2.77774	0.445473	4.04811	5.16338e-05	0.00143872
WBGene00021072	W07B8.4	protein_coding	V	1130088		39.6442	2.52194	0.397541	4.04604	5.20923e-05	0.00144896
WBGene00004859	sma-5	protein_coding	X	11997525	Mitogen-activated protein kinase sma-5	861.497	1.3502	0.0878256	4.04007	5.34343e-05	0.00148371
WBGene00015569	C07D10.5	protein_coding	II	7381438		464.726	1.40472	0.101951	4.02957	5.58799e-05	0.00154356
WBGene00021160	gba-4	protein_coding	IV	5344591	Putative glucosylceramidase 4	2106.38	1.54626	0.138411	4.02873	5.60779e-05	0.00154636
WBGene00020860	nspd-10	protein_coding	I	10878047	Nematode Specific Peptide family, group D	33.3054	2.69749	0.438412	4.0241	5.71939e-05	0.00157441
WBGene00020449	fbxa-54	protein_coding	III	956334	F-box A protein	148.625	1.67118	0.171201	4.0221	5.76816e-05	0.0015851
WBGene00044332	clec-36	protein_coding	V	16846867	C-type LECtin	21.6751	2.39561	0.358943	4.02125	5.78906e-05	0.00158811
WBGene00016357	C33F10.11	protein_coding	II	4834159		30.5566	3.00056	0.495286	4.01859	5.85478e-05	0.00160339
WBGene00021325	Y34B4A.9	protein_coding	X	5255194		5017.72	1.41676	0.105467	4.01435	5.96089e-05	0.00162687
WBGene00194713	F19B10.13	protein_coding	II	3662258		178.906	1.7245	0.186302	4.01032	6.06371e-05	0.0016521
WBGene00002102	ins-19	protein_coding	II	3126032	INSulin related	137.974	2.32188	0.356082	4.00106	6.30595e-05	0.00171226
WBGene00010091	ssp-35	protein_coding	V	12263368	Sperm Specific family, class P	42.7342	2.69204	0.436065	3.99222	6.54563e-05	0.00177432
WBGene00007599	C15A11.7	protein_coding	I	7405030		479.164	1.47996	0.122569	3.99083	6.58416e-05	0.00178174
WBGene00000841	cul-6	protein_coding	IV	12586486	Cullin-6	427.953	1.52058	0.1337	3.98018	6.88642e-05	0.00186038
WBGene00020445	T12B3.2	protein_coding	IV	7376897		316.143	1.49995	0.128253	3.97596	7.00973e-05	0.0018905
WBGene00017478	F15A8.6	protein_coding	X	4430866	Carboxylic ester hydrolase	1027.21	1.37647	0.0963168	3.97072	7.16551e-05	0.00192925
WBGene00017246	F08D12.2	protein_coding	II	2781655		51.9512	2.23161	0.326353	3.96366	7.38082e-05	0.00198387
WBGene00007808	best-7	protein_coding	IV	11226589	BESTrophin (chloride channel) homolog	449.539	1.45971	0.118355	3.95131	7.77261e-05	0.00208567
WBGene00007685	C18E9.5	protein_coding	II	8969983		752.089	1.31707	0.0812786	3.94769	7.89082e-05	0.00211384
WBGene00012529	Y32F6A.4	protein_coding	V	10428727		1368.27	1.28571	0.073364	3.93748	8.23433e-05	0.00219481
WBGene00009903	F49E12.10	protein_coding	II	8391088		130.893	1.9165	0.242301	3.93772	8.2258e-05	0.00219481
WBGene00011486	T05E12.3	protein_coding	V	17076865		384.988	1.40161	0.103855	3.92747	8.58453e-05	0.00228434
WBGene00007601	C15C6.2	protein_coding	I	12203800		143.851	2.18376	0.322558	3.91796	8.93006e-05	0.00237233
WBGene00044759	T06E6.15	protein_coding	V	15398939		29.2015	2.47485	0.396055	3.916	9.00296e-05	0.00238773
WBGene00001603	gln-2	protein_coding	III	9943240	Probable glutamine synthetase	46.2507	2.65835	0.442439	3.90625	9.37388e-05	0.00247377
WBGene00009852	arrd-24	protein_coding	X	13979240	ARRestin Domain protein	54.5434	2.20147	0.324574	3.90409	9.45797e-05	0.00249185
WBGene00004810	skr-4	protein_coding	V	19924224	SKp1 Related (ubiquitin ligase complex component)	727.932	1.39346	0.102519	3.89921	9.65082e-05	0.00253847
WBGene00013197	ttm-5	protein_coding	I	14688672	Putative sphingolipid delta(4)-desaturase/C4-monooxygenase	657.691	1.39487	0.103026	3.89725	9.72918e-05	0.00255487
WBGene00019783	M70.1	protein_coding	IV	2245897		18.1797	2.72466	0.578481	3.89633	9.76632e-05	0.00256041
WBGene00015348	C02F5.5	protein_coding	III	8236146		61.1742	2.29852	0.353898	3.89028	0.000100128	0.00261643
WBGene00009517	clec-167	protein_coding	IV	1253137	C-type LECtin	40.5638	3.06962	0.489781	3.88361	0.000102917	0.00268492
WBGene00010545	cbp-2	protein_coding	III	9923174	CBP/p300 homolog	1128.38	1.30007	0.0782904	3.88037	0.000104296	0.00271647
WBGene00004119	pqn-31	protein_coding	V	9109603	Prion-like-(Q/N-rich)-domain-bearing protein	205.537	1.80759	0.217174	3.87947	0.000104684	0.00272211
WBGene00017058	D2062.6	protein_coding	II	2619442		20.2935	3.32933	0.511732	3.87885	0.000104952	0.00272465
WBGene00012069	T26H5.4	protein_coding	V	15447640		27.3889	2.60668	0.561994	3.85205	0.000117133	0.00303595
WBGene00016555	math-20	protein_coding	II	1996537	MATH (meprin-associated Traf homology) domain containing	226.639	1.53747	0.143067	3.84137	0.00012235	0.0031609
WBGene00008101	C44H9.6	protein_coding	V	12842494		346.655	1.39714	0.10512	3.83948	0.000123295	0.00318017
WBGene00008229	C50F4.1	protein_coding	V	9526733		1312.32	1.42746	0.113679	3.8276	0.000129399	0.00333224
WBGene00017802	F26A1.3	protein_coding	III	4826909		22.103	3.05073	0.50453	3.82713	0.000129645	0.0033332
WBGene00013607	clec-27	protein_coding	V	16854646	C-type LECtin	10.7348	3.19661	0.543647	3.82604	0.000130223	0.00334267
WBGene00013290	Y57G11A.2	protein_coding	IV	14517023		103.405	2.33859	0.379635	3.81759	0.000134762	0.00345363
WBGene00020223	T05A7.6	protein_coding	II	4668644		47.8061	2.88699	0.47625	3.81463	0.000136387	0.00348408
WBGene00009008	F21D5.3	protein_coding	IV	8730721		1320.63	1.55444	0.149126	3.80804	0.000140073	0.00356684
WBGene00044501	C55C3.8	protein_coding	IV	5691030		8.20451	3.42799	0.576606	3.80662	0.000140882	0.00358171
WBGene00001501	ftn-2	protein_coding	I	3680178	Ferritin	6438.64	1.40239	0.107681	3.8003	0.000144518	0.0036625
WBGene00018548	clec-79	protein_coding	IV	3973349	C-type LECtin	36.2489	2.68594	0.458796	3.7975	0.000146162	0.0036983
WBGene00012535	Y37A1A.2	protein_coding	IV	13905990		168.541	1.56386	0.152674	3.78567	0.000153292	0.00387257
WBGene00017312	pitr-5	protein_coding	V	7184910	PIT (mammalian phosphate transporter) Related	133.157	1.81488	0.222884	3.78306	0.000154914	0.00390734
WBGene00012781	nspd-7	protein_coding	IV	10268662	Nematode Specific Peptide family, group D	51.4527	2.15465	0.322282	3.77418	0.000160537	0.00403644
WBGene00013956	ZK265.3	protein_coding	I	8242106		56.3149	2.36952	0.388497	3.77348	0.000160983	0.00404128
WBGene00016134	C26B9.5	protein_coding	X	5329455		2270.99	1.26076	0.0700407	3.76446	0.00016691	0.00418349
WBGene00019958	R08E3.2	protein_coding	X	4822659		937.321	1.43738	0.118453	3.76395	0.000167247	0.00418537
WBGene00020070	rmd-6	protein_coding	IV	5068868	Regulator of Microtubule Dynamics	24.4584	2.9626	0.497792	3.76184	0.000168671	0.0042144
WBGene00015907	C17F3.1	protein_coding	I	6669184		30.3059	2.93172	0.491618	3.75692	0.000172016	0.00429127
WBGene00044382	Y14H12A.2	protein_coding	II	3988700		16.3133	2.55211	0.433146	3.74446	0.000180784	0.00450295
WBGene00044534	H23N18.6	protein_coding	V	4913061		25.2669	2.32253	0.370706	3.74299	0.000181841	0.00451521
WBGene00009856	clec-24	protein_coding	V	16862012	C-type LECtin	9.90241	2.9346	0.521382	3.74076	0.000183466	0.00454142
WBGene00014247	ZK1307.4	protein_coding	II	9650959		23.909	2.82826	0.490552	3.73081	0.000190866	0.00471
WBGene00012207	W02B12.12	protein_coding	II	11476755		48.9595	2.46101	0.416602	3.72797	0.00019303	0.00475604
WBGene00015828	math-14	protein_coding	II	1869410	MATH (meprin-associated Traf homology) domain containing	335.366	1.61286	0.169663	3.72215	0.000197537	0.00485212
WBGene00006533	tba-7	protein_coding	III	11368415	TuBulin, Alpha	813.298	1.3788	0.103672	3.7173	0.00020136	0.00493842
WBGene00007605	asp-10	protein_coding	V	12742041	ASpartyl Protease	32425.5	1.45476	0.125171	3.7086	0.000208408	0.00509564
WBGene00003450	msp-57	protein_coding	IV	5062543	Major sperm protein 55/57	210.305	2.58174	0.501296	3.70342	0.000212711	0.00519288
WBGene00003469	msp-142	protein_coding	II	5797893	Major sperm protein 19/31/40/45/50/51/53/59/61/65/81/113/142	72.0751	2.20888	0.348982	3.70256	0.000213439	0.00520269
WBGene00018200	btb-17	protein_coding	II	3295414	BTB (Broad/complex/Tramtrack/Bric a brac) domain protein	127.4	1.6146	0.170812	3.7004	0.00021526	0.00523908
WBGene00017978	F32B5.4	protein_coding	I	2692077		19.2827	3.15968	0.520077	3.68489	0.000228799	0.00555168
WBGene00000016	abf-5	protein_coding	X	12792849	AntiBacterial Factor related	71.0218	2.00597	0.288014	3.68374	0.00022984	0.00556847
WBGene00016542	C39H7.4	protein_coding	IV	5612012		992.116	1.29965	0.0825846	3.67801	0.000235061	0.00568635
WBGene00010754	K10G4.5	protein_coding	V	17298341		20.0302	2.35426	0.387175	3.67644	0.000236516	0.00571287
WBGene00011173	acs-18	protein_coding	IV	10310791	fatty Acid CoA Synthetase family	36.6137	2.73977	0.483342	3.67174	0.000240905	0.0058101
WBGene00011130	zip-6	protein_coding	IV	11213446	bZIP transcription factor family	30.1295	2.45419	0.425776	3.65139	0.00026082	0.00627203
WBGene00020326	math-38	protein_coding	II	1577369	MATH (meprin-associated Traf homology) domain containing	40.646	1.96062	0.273779	3.64581	0.00026655	0.00639961
WBGene00011134	ssp-33	protein_coding	V	14711341	Sperm Specific family, class P	8.63904	2.65683	0.601661	3.64372	0.000268731	0.00644227
WBGene00017103	klo-2	protein_coding	III	2446223	KLOtho (mammalian aging-associated protein) homolog	482.146	1.42875	0.120405	3.63082	0.000282519	0.00676266
WBGene00011539	fbxa-135	protein_coding	V	15402277	F-box A protein	26.2739	2.48443	0.439839	3.62608	0.000287752	0.00687761
WBGene00022860	ZK1193.4	protein_coding	X	422890		66.5745	1.86808	0.250016	3.61781	0.000297106	0.00709059
WBGene00010900	M28.9	protein_coding	II	10639457		33.959	2.45669	0.430093	3.61052	0.000305583	0.00728201
WBGene00003444	msp-51	protein_coding	IV	5294922	Major sperm protein 19/31/40/45/50/51/53/59/61/65/81/113/142	61.1061	2.39014	0.421786	3.60487	0.000312314	0.0074313
WBGene00019014	F57C12.2	protein_coding	X	549356		130.777	1.62509	0.178926	3.6036	0.000313842	0.00745655
WBGene00020921	W01C8.5	protein_coding	X	5694475	Uncharacterized protein; XG314	906.462	1.37297	0.105554	3.59558	0.000323675	0.00767875
WBGene00022572	ZC239.14	protein_coding	II	3221125		168.179	1.84211	0.247608	3.59099	0.000329428	0.00778055
WBGene00009798	F46G10.4	protein_coding	X	13334077		396.368	1.40419	0.115033	3.58356	0.000338945	0.0079817
WBGene00021321	Y34B4A.5	protein_coding	X	5257213		265.937	1.5039	0.14415	3.58124	0.000341961	0.00804086
WBGene00006539	tbb-6	protein_coding	V	12261804	TuBulin, Beta	512.771	1.57713	0.166625	3.58048	0.000342958	0.00805246
WBGene00009859	clec-33	protein_coding	V	16867678	C-type LECtin	6.52517	3.25576	0.592678	3.57203	0.000354226	0.00828193
WBGene00013901	ugt-16	protein_coding	V	12825026	UDP-glucuronosyltransferase	1083.02	1.49067	0.141613	3.56547	0.000363207	0.00846433
WBGene00013854	cyc-2.2	protein_coding	V	12611680	Probable cytochrome c 2.2	33.2797	2.45672	0.440192	3.56513	0.000363681	0.00846433
WBGene00020713	T23B3.5	protein_coding	I	6705548		36.7619	2.60619	0.473791	3.56284	0.000366865	0.008526
WBGene00022497	Y119D3B.21	protein_coding	III	1214952		4976.63	1.57334	0.166511	3.54327	0.000395196	0.00915776
WBGene00020972	trpl-2	protein_coding	IV	4326716	TRP-channel-Like	214.535	1.49227	0.142632	3.54018	0.000399858	0.00923898
WBGene00004994	spp-9	protein_coding	X	11487788	SaPosin-like Protein family	3.92861	2.86081	0.633486	3.53057	0.000414661	0.00956716
WBGene00021993	Y59E9AL.3	protein_coding	IV	5218832		152.615	2.0474	0.31948	3.51454	0.000440512	0.0101343
WBGene00005657	srr-6	protein_coding	V	5012994	Serpentine Receptor, class R	703.505	1.6386	0.189355	3.5095	0.000448955	0.0103137
WBGene00020529	T15B7.17	protein_coding	V	6813700		16.0863	2.50572	0.453358	3.50604	0.000454831	0.0104337
WBGene00010254	F58E6.5	protein_coding	V	9753425	Major sperm protein	50.6146	2.37511	0.430524	3.50404	0.00045825	0.010497
WBGene00007506	C10C5.2	protein_coding	IV	9371508		657.842	1.45261	0.132504	3.50246	0.000460988	0.0105446
WBGene00013439	Y66D12A.13	protein_coding	III	11548377		183.186	1.56592	0.166752	3.49708	0.000470377	0.0107336
WBGene00020859	bath-25	protein_coding	I	10876209	BTB and MATH domain containing	86.5684	2.16605	0.364378	3.49696	0.000470593	0.0107336
WBGene00021619	Y47D7A.6	protein_coding	V	4417738		10.1283	2.85741	0.543625	3.49504	0.000473982	0.0107954
WBGene00006609	tre-3	protein_coding	V	11709775	Trehalase	1213.03	1.31498	0.0915592	3.49418	0.000475515	0.0108149
WBGene00010116	F55F3.2	protein_coding	X	13760290	Carboxylic ester hydrolase	321.705	1.43152	0.126205	3.49181	0.000479761	0.010896
WBGene00017542	F17E9.5	protein_coding	IV	8345818		67.6275	2.28216	0.40297	3.48852	0.0004857	0.0110152
WBGene00017851	F27C1.1	protein_coding	I	5434807		142.072	2.39575	0.45746	3.48166	0.000498315	0.0112693
WBGene00010334	del-5	protein_coding	X	11004991	DEgenerin Like	233.727	1.49909	0.147117	3.48098	0.000499579	0.0112819
WBGene00021814	Y53G8AR.7	protein_coding	III	3282308		303.66	1.39083	0.114514	3.47929	0.000502751	0.0113375
WBGene00020256	T05C3.6	protein_coding	V	5490370		339.633	1.38932	0.114263	3.47214	0.000516332	0.0115946
WBGene00012201	W02B12.1	protein_coding	II	11449020		702.757	1.3405	0.100097	3.46081	0.000538543	0.0120764
WBGene00012464	arrd-7	protein_coding	II	12060228	ARRestin Domain protein	747.366	1.35171	0.103835	3.4504	0.000559761	0.0125346
WBGene00012086	clec-144	protein_coding	II	11831076	C-type LECtin	10.5343	2.98418	0.55204	3.44461	0.000571889	0.0127882
WBGene00004394	rol-1	protein_coding	II	12172573	ROLler: helically twisted, animals roll when moving	9.81069	3.11774	0.577042	3.443	0.000575301	0.0128465
WBGene00015085	B0244.10	protein_coding	III	5733997	Putative G-protein coupled receptor B0244.10	233.493	1.50072	0.149462	3.43852	0.000584906	0.0130427
WBGene00011879	pho-7	protein_coding	X	10938197	intestinal acid PHOsphatase	185.529	1.53917	0.161417	3.43462	0.000593388	0.0132134
WBGene00010377	nspa-1	protein_coding	V	14886803	Nematode Specific Peptide family, group A	31.9711	2.5136	0.473878	3.43102	0.000601319	0.0133714
WBGene00016781	C49G7.3	protein_coding	V	4046405		680.487	1.49923	0.15003	3.42388	0.000617332	0.0137084
WBGene00009907	F49H6.3	protein_coding	V	17014401		8.89592	2.38976	0.619943	3.41036	0.000648782	0.0143668
WBGene00010474	K01D12.15	protein_coding	V	12386312		10.6359	2.43584	0.606198	3.40347	0.000665349	0.0147132
WBGene00012926	Y47D3A.13	protein_coding	III	11223446		22.5955	2.69953	0.510444	3.39862	0.000677257	0.0149352
WBGene00007322	C05B5.5	protein_coding	III	10001375	Uncharacterized F-box protein C05B5.5	75.5035	1.7195	0.22057	3.39282	0.000691781	0.0152135
WBGene00008498	F01D5.8	protein_coding	II	14010722		386.652	1.44212	0.133594	3.39051	0.000697639	0.0153212
WBGene00007584	C14C10.1	protein_coding	V	12588428		74.1913	2.13572	0.364346	3.38764	0.00070496	0.0154607
WBGene00012809	Y43F8A.2	protein_coding	V	19371568		33.4843	2.4702	0.469286	3.38589	0.000709484	0.0155386
WBGene00020187	gsp-4	protein_coding	I	3838237	Serine/threonine-protein phosphatase	59.4676	2.16454	0.374393	3.377	0.000732805	0.0160054
WBGene00003424	msp-3	protein_coding	II	4785861	Major sperm protein 3	52.4423	2.23376	0.398766	3.37718	0.000732324	0.0160054
WBGene00019406	acdh-8	protein_coding	II	5794507	Acyl CoA DeHydrogenase	35.7012	2.34658	0.433742	3.37022	0.000751082	0.0163376
WBGene00013771	Y113G7C.1	protein_coding	V	20317837	Protein-tyrosine-phosphatase	51.6947	2.39771	0.455766	3.35764	0.000786101	0.017076
WBGene00000136	amt-4	protein_coding	X	4565302	Ammonium transporter	643.736	1.31155	0.0943348	3.35674	0.000788681	0.0171088
WBGene00012595	Y38E10A.17	protein_coding	II	12632586		102.432	2.00751	0.324725	3.34422	0.000825149	0.0178756
WBGene00016758	C49A9.4	protein_coding	IV	6219604		299.172	1.35266	0.107567	3.34053	0.000836175	0.0180899
WBGene00011330	T01D3.6	protein_coding	V	13716849		4461.2	1.38128	0.116861	3.33353	0.000857517	0.0185015
WBGene00004023	pho-4	protein_coding	II	5236094	intestinal acid PHOsphatase	165.248	1.518	0.160081	3.33219	0.00086166	0.0185658
WBGene00006044	ssp-16	protein_coding	I	6102032	Sperm-specific class P protein 16	29.8022	2.49709	0.482802	3.32889	0.000871917	0.0187615
WBGene00015051	B0218.7	protein_coding	IV	8164594		27.8982	2.50239	0.495843	3.32809	0.000874426	0.0187902
WBGene00000216	asp-3	protein_coding	X	6791064	Aspartic protease 3	28047.5	1.27893	0.0851752	3.32538	0.000882988	0.0189486
WBGene00008296	cdr-2	protein_coding	V	12414622	CaDmium Responsive	1707.71	1.54917	0.170765	3.31978	0.000900886	0.0192809
WBGene00012028	srz-99	protein_coding	V	16730261	Serpentine Receptor, class Z	50.8678	1.77751	0.245761	3.30552	0.000948009	0.0202082
WBGene00022006	mpst-5	protein_coding	IV	8567183	MercaptoPyruvate SulfurTransferase homolog	34.6909	2.3995	0.468299	3.29927	0.000969368	0.0206143
WBGene00003458	msp-65	protein_coding	IV	5316488	Major sperm protein 19/31/40/45/50/51/53/59/61/65/81/113/142	32.4101	2.31708	0.440844	3.29324	0.000990401	0.0210276
WBGene00000738	col-165	protein_coding	X	4353618	COLlagen	6.63774	2.97397	0.648984	3.27579	0.00105366	0.0222818
WBGene00020715	nspd-4	protein_coding	II	4842564	Nematode Specific Peptide family, group D	35.7582	2.28	0.430182	3.27391	0.00106071	0.0224011
WBGene00020358	math-39	protein_coding	II	1832343	MATH (meprin-associated Traf homology) domain containing	106.724	1.63596	0.203175	3.25124	0.00114901	0.0242105
WBGene00001506	fut-2	protein_coding	V	6573983	FUcosyl Transferase	29.1068	2.15577	0.380212	3.25114	0.00114941	0.0242105
WBGene00003877	pept-1	protein_coding	X	6456687	Peptide transporter family 1	2975.44	1.29995	0.0941943	3.23965	0.00119678	0.025175
WBGene00007439	C08E8.3	protein_coding	V	18350148		109.975	2.45407	0.484155	3.23243	0.00122743	0.0257181
WBGene00019165	mpz-4	protein_coding	IV	4825520	Multiple PDZ domain protein	18.5507	2.55808	0.515123	3.23182	0.00123004	0.0257388
WBGene00010070	nep-17	protein_coding	II	13507819	NEPrilysin metallopeptidase family	12483.6	1.34552	0.109149	3.23062	0.0012352	0.0258131
WBGene00003449	msp-56	protein_coding	IV	9841443	Major sperm protein 10/36/56/76	37.9248	2.27651	0.438218	3.21765	0.00129244	0.0269389
WBGene00000984	dhs-21	protein_coding	V	12731772	L-xylulose reductase	833.41	1.34335	0.109	3.21458	0.00130634	0.0271931
WBGene00020071	R13H9.5	protein_coding	IV	5065686		20.7199	2.55694	0.562113	3.21024	0.00132625	0.0275356
WBGene00005661	srr-10	protein_coding	V	7735619	Serpentine Receptor, class R	30.0108	2.46015	0.510551	3.2077	0.001338	0.0277075
WBGene00018195	btb-16	protein_coding	II	3296908	BTB (Broad/complex/Tramtrack/Bric a brac) domain protein	191.238	1.52944	0.170946	3.20208	0.00136441	0.0281814
WBGene00009857	clec-28	protein_coding	V	16865741	C-type LECtin	9.2827	2.51015	0.495484	3.19666	0.00139029	0.0286417
WBGene00020329	bath-26	protein_coding	II	1599462	BTB and MATH domain containing	112.975	1.59496	0.193365	3.19247	0.0014106	0.0290227
WBGene00010745	dod-17	protein_coding	IV	12976293	Downstream Of DAF-16 (regulated by DAF-16)	260.781	1.44494	0.143448	3.18763	0.00143446	0.0294757
WBGene00008644	F10C2.3	protein_coding	V	12021193		613.459	1.53549	0.174998	3.1793	0.00147631	0.0302578
WBGene00021627	Y47D7A.15	protein_coding	V	4431686		11.5898	2.59279	0.537196	3.17861	0.00147981	0.0302906
WBGene00086554	D1081.12	protein_coding	I	8474082		10.9803	2.64475	0.572821	3.16528	0.00154935	0.0315924
WBGene00007793	C28D4.5	protein_coding	IV	9745555		28.0397	2.3699	0.477205	3.16442	0.00155391	0.031645
WBGene00015601	fbxa-166	protein_coding	II	1616912	F-box A protein	65.4008	1.76818	0.256352	3.15671	0.00159562	0.0324532
WBGene00011508	T05H10.3	protein_coding	II	8049049		14.223	2.83207	0.605154	3.15402	0.00161036	0.0327113
WBGene00017071	aagr-1	protein_coding	IV	8366539	Acid Alpha Glucosidase Relate	1171.78	1.24246	0.0780888	3.15033	0.00163089	0.0330861
WBGene00000190	arf-1.1	protein_coding	IV	7634832	ADP-ribosylation factor 1-like 1	152.473	1.54403	0.179294	3.14954	0.00163529	0.0331333
WBGene00006679	twk-26	protein_coding	X	3050365	TWiK family of potassium channels	117.776	1.52124	0.170575	3.14881	0.00163939	0.0331743
WBGene00015689	spch-2	protein_coding	I	6274575	SPerm CHromatin enriched	22.5712	2.49215	0.553671	3.14778	0.00164516	0.0332488
WBGene00022337	Y82E9BR.4	protein_coding	III	1398172		103.582	1.61695	0.204217	3.14125	0.00168227	0.0339558
WBGene00021768	Y51F10.7	protein_coding	I	1911678		6412.02	1.28365	0.0920522	3.13594	0.00171302	0.034533
WBGene00009471	F36D3.5	protein_coding	V	16510369		13.6297	2.12132	0.59505	3.13352	0.00172723	0.0347755
WBGene00017591	F19C7.1	protein_coding	IV	4605786		5025.25	1.31134	0.10141	3.13047	0.00174529	0.0350948
WBGene00016265	nmur-4	protein_coding	I	6989067	NMUR (NeuroMedin U Receptor) homolog	497.091	1.38249	0.125343	3.13001	0.001748	0.0351051
WBGene00018210	F39G3.5	protein_coding	V	4722620		372.621	1.43237	0.142122	3.12731	0.00176415	0.0353848
WBGene00009805	F47B8.4	protein_coding	V	14323532		86.3962	1.881	0.305577	3.11917	0.00181363	0.0363318
WBGene00008794	F14D7.7	protein_coding	V	14306504		24.974	2.1281	0.392772	3.11833	0.00181882	0.03639
WBGene00022859	ZK1193.3	protein_coding	X	417482		100.072	1.71313	0.240148	3.11408	0.0018452	0.0368717
WBGene00013999	ZK550.5	protein_coding	IV	17257511		37.8791	2.18689	0.423684	3.11116	0.00186353	0.0371914
WBGene00009185	F27C8.5	protein_coding	IV	9589792		26.3989	2.47327	0.508254	3.1103	0.00186894	0.0372529
WBGene00022858	ZK1193.2	protein_coding	X	406452		442.179	1.31585	0.1036	3.1099	0.00187149	0.0372571
WBGene00022848	ZK1055.7	protein_coding	V	6602737		1960.01	1.27517	0.0901621	3.1073	0.00188802	0.0374927
WBGene00017364	clec-7	protein_coding	V	7328397	C-type LECtin	136.626	1.56424	0.188118	3.10739	0.00188746	0.0374927
WBGene00044349	Y71G12B.32	protein_coding	I	1813909		44.0464	1.95316	0.33008	3.10484	0.00190383	0.0377129
WBGene00044207	Y6G8.5	protein_coding	V	17614694		25.405	2.09245	0.378805	3.10134	0.00192648	0.0381141
WBGene00012027	fbxa-127	protein_coding	V	16728731	F-box A protein	75.1115	1.6019	0.202733	3.08812	0.00201427	0.0398017
WBGene00010123	F55G11.2	protein_coding	IV	12967448		149.903	1.74839	0.257459	3.0877	0.00201709	0.0398082
WBGene00016282	C31B8.7	protein_coding	V	2900448		103.447	1.62931	0.21261	3.08636	0.00202625	0.0399396
WBGene00015713	C12D12.1	protein_coding	X	3499253		3122.16	1.33782	0.111961	3.08416	0.0020413	0.0401372
WBGene00019858	R03H10.6	protein_coding	II	4171294		55.9614	1.83916	0.289896	3.08426	0.00204058	0.0401372
WBGene00015217	tes-1	protein_coding	IV	7449073	TEStin (human testis-derived transcript) homolog	943.824	1.2946	0.097448	3.08193	0.00205661	0.0403886
WBGene00000711	col-138	protein_coding	IV	17182800	COLlagen	22.9791	2.22088	0.432896	3.07944	0.00207388	0.0406776
WBGene00009031	F21H7.5	protein_coding	V	16237539	Major sperm protein	98.361	1.78086	0.270534	3.07599	0.00209803	0.0411007
WBGene00007448	C08F8.6	protein_coding	IV	11162786		20.3558	2.43678	0.552058	3.07176	0.002128	0.0416369
WBGene00007307	spch-1	protein_coding	IV	10110347	SPerm CHromatin enriched	83.4792	1.94808	0.337683	3.07045	0.00213738	0.0417692
WBGene00008596	clec-54	protein_coding	V	14476911	C-type LECtin	256.465	1.3948	0.131789	3.06972	0.00214259	0.0418199
WBGene00021322	Y34B4A.6	protein_coding	X	5253001		6199.45	1.29963	0.0998662	3.0598	0.00221488	0.0431254
WBGene00005703	sru-40	protein_coding	V	9832431	Serpentine Receptor, class U	10.6396	2.47593	0.521007	3.05997	0.00221356	0.0431254
WBGene00004904	snf-5	protein_coding	II	12861948	Transporter	70.2254	1.91368	0.325023	3.04796	0.00230398	0.0448056
WBGene00019166	tat-2	protein_coding	IV	4827854	Phospholipid-transporting ATPase	724.56	1.35302	0.118875	3.04477	0.0023286	0.0451742
WBGene00044273	nspa-6	protein_coding	V	14889407	Nematode Specific Peptide family, group A	30.3406	1.96699	0.578314	3.04481	0.00232827	0.0451742
WBGene00019115	nhr-195	protein_coding	V	8970744	Nuclear Hormone Receptor family	133.55	1.49137	0.168174	3.0244	0.00249125	0.048154
WBGene00021178	Y9C9A.8	protein_coding	IV	4930365		164.855	1.51805	0.177695	3.02081	0.00252099	0.0485527
WBGene00015572	C07G1.6	protein_coding	IV	8209157		18.3814	1.966	0.585381	3.01726	0.00255067	0.0490651
WBGene00008493	F01D5.2	protein_coding	II	13998497		94.9463	1.7255	0.255014	3.01474	0.00257197	0.0493266
WBGene00015829	math-15	protein_coding	II	1866386	MATH (meprin-associated Traf homology) domain containing	28.5867	2.02175	0.366464	3.01248	0.00259123	0.0496063

## Sheet: lfc < -1 down with padj<0.05
List of downregulated genes														Genes containing a tandem-direct repeat motif in nhr-14(tm1473)downregulated genes
id	gene_name	biotype	chromosome	start	description	baseMean	log2FoldChange	lfcSE	stat	pvalue	padj
WBGene00012186	mlt-11	protein_coding	V	20667211		593.445	-6.20832	0.229158	-21.9914	3.4787e-107	5.5541e-104			agmo-1
WBGene00009926	noah-2	protein_coding	IV	14091254	NOmpA Homolog (Drosophila nompA: no mechanoreceptor potential A)	436.446	-5.24319	0.189482	-21.9381	1.1254e-106	1.6335e-103			C09F9.2
WBGene00016422	noah-1	protein_coding	I	5874433	NOmpA Homolog (Drosophila nompA: no mechanoreceptor potential A)	618.727	-4.20515	0.158289	-20.1982	1.0162e-90	9.5439e-88			F13D12.9
WBGene00006366	sym-1	protein_coding	X	14581654	SYM-1 protein; Uncharacterized protein	307.239	-4.75251	0.203092	-18.1446	1.41711e-73	1.07741e-70			F01D5.6
WBGene00021236	pud-1.2	protein_coding	V	2322038	Protein Up-regulated in Daf-2(gf)	11465.4	-3.01129	0.114632	-17.6099	2.06833e-69	1.37596e-66			lin-42
WBGene00017501	pud-3	protein_coding	V	2324510	Protein Up-regulated in Daf-2(gf)	2178.39	-4.75713	0.217487	-17.3339	2.60941e-67	1.60238e-64			fat-5
WBGene00017490	pud-2.1	protein_coding	V	2329444	Protein Up-regulated in Daf-2(gf)	17586.1	-3.31692	0.13574	-17.1466	6.6666e-66	3.94218e-63			cbn-1
WBGene00012261	lpr-3	protein_coding	X	11057436	LiPocalin-Related protein	258.478	-5.86411	0.27342	-16.8109	2.02928e-63	1.11722e-60			col-65
WBGene00005016	sqt-1	protein_coding	II	11336691	Cuticle collagen sqt-1	211.622	-5.54837	0.271866	-15.8843	8.14553e-57	3.94095e-54			R03H10.2
WBGene00005017	sqt-2	protein_coding	II	23328	SQuaT	204.882	-4.92006	0.24307	-15.6499	3.32562e-55	1.39729e-52			lpr-1
WBGene00000606	col-17	protein_coding	II	4866436	COLlagen	233.635	-5.66956	0.283927	-15.6019	7.06054e-55	2.89047e-52			ptr-18
WBGene00017498	pud-4	protein_coding	V	2326678	Protein Up-regulated in Daf-2(gf)	856.566	-4.64842	0.235962	-15.3953	1.76031e-53	6.8549e-51			col-46
WBGene00004264	qua-1	protein_coding	II	8198803	QUAhog (hedgehog related)	219.905	-4.3725	0.219669	-15.0582	3.04953e-51	1.15926e-48			ZK1025.3
WBGene00012256	lpr-5	protein_coding	X	11062132	LiPocalin-Related protein	186.337	-5.23963	0.270435	-15.0035	6.96249e-51	2.58519e-48			Y53F4B.27
WBGene00018572	lin-42	protein_coding	II	1233244	Period protein homolog lin-42	185.724	-4.17456	0.214909	-14.5299	7.8362e-48	2.78029e-45
WBGene00020674	T22B7.7	protein_coding	X	5651870		1159.42	-4.12896	0.224656	-14.0177	1.21463e-44	3.72939e-42
WBGene00022816	fbn-1	protein_coding	III	7625376	FiBrilliN homolog	214.857	-3.68939	0.191192	-13.9636	2.59801e-44	7.82639e-42
WBGene00004398	rol-8	protein_coding	II	7544106	Cuticle collagen 6	151.522	-5.40612	0.296533	-13.9013	6.21777e-44	1.80496e-41
WBGene00004397	rol-6	protein_coding	II	8733050	Cuticle collagen rol-6	137.203	-4.92983	0.282546	-13.2838	2.8731e-40	7.28126e-38
WBGene00010953	clec-190	protein_coding	IV	15124933	C-type LECtin	1005.83	-2.53894	0.119596	-12.9155	3.68044e-38	9.04029e-36
WBGene00018418	F44E2.4	protein_coding	III	8832467		199.398	-3.72299	0.209378	-12.9068	4.12178e-38	9.97097e-36
WBGene00012257	lpr-4	protein_coding	X	11065133	LiPocalin-Related protein	160.942	-4.63035	0.279518	-12.654	1.06256e-36	2.53207e-34
WBGene00007479	C09F9.2	protein_coding	II	14705516		154.797	-4.8392	0.294874	-12.5524	3.85877e-36	9.06016e-34
WBGene00021095	mlt-8	protein_coding	II	569269		215.62	-3.36096	0.1913	-12.3023	8.8e-35	2.03624e-32
WBGene00019272	H42K12.3	protein_coding	X	1311605		116.497	-4.91831	0.30395	-12.2119	2.68539e-34	6.12498e-32
WBGene00001070	dpy-8	protein_coding	X	5148678	DumPY: shorter than wild-type	150.944	-4.20568	0.260395	-12.0648	1.62077e-33	3.59405e-31
WBGene00001064	dpy-2	protein_coding	II	6714292	Cuticle collagen dpy-2	140.207	-4.05137	0.249697	-12.0008	3.51683e-33	7.69174e-31
WBGene00012648	Y39A1A.9	protein_coding	III	10630078		104.316	-4.226	0.264374	-11.7533	6.79215e-32	1.44591e-29
WBGene00022103	cdh-12	protein_coding	III	1152044	CaDHerin family	155.646	-3.99247	0.254869	-11.5495	7.42814e-31	1.52048e-28
WBGene00022679	ZK180.5	protein_coding	IV	4515039		166.223	-4.80419	0.325232	-11.3791	5.3159e-30	1.04782e-27
WBGene00012255	lpr-6	protein_coding	X	11059994	LiPocalin-Related protein	92.3728	-4.31646	0.280417	-11.3585	6.72801e-30	1.29421e-27
WBGene00001069	dpy-7	protein_coding	X	7536460	Cuticle collagen dpy-7	110.175	-4.1677	0.271444	-11.3512	7.31109e-30	1.38963e-27
WBGene00005018	sqt-3	protein_coding	V	12352994	Cuticle collagen 1	421.701	-3.71101	0.243127	-11.214	3.48078e-29	6.38783e-27
WBGene00001074	dpy-13	protein_coding	IV	4235614	Cuticle collagen dpy-13	172.183	-4.03407	0.270018	-11.127	9.26955e-29	1.64442e-26
WBGene00000618	col-41	protein_coding	X	15175039	COLlagen	121.33	-6.10587	0.400154	-10.979	4.82055e-28	8.27579e-26
WBGene00008605	mlt-9	protein_coding	X	15101787		108.781	-4.15973	0.281313	-10.8841	1.37268e-27	2.28293e-25
WBGene00004219	ptr-4	protein_coding	X	6060757	PaTched Related family	134.196	-4.21709	0.297163	-10.6234	2.31965e-26	3.74096e-24
WBGene00044623	bus-8	protein_coding	X	5492976	Glycosyltransferase; Uncharacterized protein	83.0794	-4.21718	0.293338	-10.5051	8.18209e-26	1.2683e-23
WBGene00001072	dpy-10	protein_coding	II	6710150	Cuticle collagen dpy-10	183.11	-2.83525	0.174871	-10.4742	1.13515e-25	1.74267e-23
WBGene00001684	gpd-2	protein_coding	X	3113434	Glyceraldehyde-3-phosphate dehydrogenase 2	3875.38	-2.83961	0.177791	-10.4504	1.45845e-25	2.21768e-23
WBGene00000928	dao-2	protein_coding	II	4562853	Dauer or Aging adult Overexpression	274.967	-3.69881	0.260867	-10.3765	3.17065e-25	4.73108e-23
WBGene00000740	col-167	protein_coding	X	6323297	COLlagen	419.769	-2.60688	0.157786	-10.2152	1.69451e-24	2.48207e-22
WBGene00014183	ZK1025.3	protein_coding	I	11460780		77.642	-4.44016	0.321842	-10.127	4.19223e-24	6.08484e-22
WBGene00001066	dpy-4	protein_coding	IV	14985543	DumPY: shorter than wild-type	140.507	-3.89424	0.284023	-10.0881	6.2359e-24	8.8895e-22
WBGene00000402	cdh-10	protein_coding	IV	2436515	CaDHerin family	98.1686	-3.62463	0.25435	-10.0788	6.85711e-24	9.68855e-22
WBGene00009983	cut-2	protein_coding	V	13415062	Cuticlin-2	98.0548	-5.12351	0.380001	-9.90054	4.14021e-23	5.69849e-21
WBGene00009094	F23H12.5	protein_coding	V	12358647		109.998	-3.28449	0.231142	-9.78335	1.32747e-22	1.79613e-20
WBGene00001725	grl-16	protein_coding	I	572177	GRound-Like (grd related)	128.501	-4.13989	0.316632	-9.74454	1.94653e-22	2.61163e-20
WBGene00004120	pqn-32	protein_coding	II	13108019	Prion-like-(Q/N-rich)-domain-bearing protein	93.5137	-4.07204	0.307205	-9.72315	2.40231e-22	3.19627e-20
WBGene00044998	M199.9	protein_coding	IV	15127491		102.065	-3.69737	0.281316	-9.44458	3.5682e-21	4.59435e-19
WBGene00000722	col-149	protein_coding	V	10291696	COLlagen	109.178	-2.8958	0.20095	-9.36195	7.8276e-21	9.91869e-19
WBGene00000665	col-90	protein_coding	III	7948838	Putative cuticle collagen 90	104.842	-3.90376	0.307293	-9.29362	1.49133e-20	1.87485e-18
WBGene00000705	col-131	protein_coding	IV	13065729	COLlagen	58.9433	-4.43785	0.346037	-9.22546	2.82358e-20	3.49467e-18
WBGene00001065	dpy-3	protein_coding	X	2144602	DumPY: shorter than wild-type	71.1139	-5.8378	0.429948	-9.16941	4.75633e-20	5.79691e-18
WBGene00001071	dpy-9	protein_coding	IV	257382	DumPY: shorter than wild-type	85.3805	-4.17516	0.334976	-9.16065	5.15839e-20	6.23931e-18
WBGene00017991	clec-180	protein_coding	IV	7568902	C-type lectin domain-containing protein 180	84.9154	-3.89242	0.308813	-9.14579	5.9198e-20	7.05339e-18
WBGene00001067	dpy-5	protein_coding	I	5432158	Cuticle collagen dpy-5	170.435	-3.79268	0.306617	-9.11552	7.82927e-20	9.25941e-18
WBGene00017998	F33D4.6	protein_coding	IV	7714164		77.4599	-4.15527	0.342349	-8.92946	4.2809e-19	4.95281e-17
WBGene00002282	let-4	protein_coding	X	14577953	Leucine-rich repeat-containing protein let-4	63.0302	-3.77155	0.303193	-8.79304	1.45571e-18	1.64835e-16
WBGene00021625	Y47D7A.13	protein_coding	V	4434882		92.979	-4.25228	0.35804	-8.78415	1.57558e-18	1.77152e-16
WBGene00004133	abu-13	protein_coding	III	6941888	Activated in Blocked Unfolded protein response	62.9646	-3.80913	0.306976	-8.72587	2.64151e-18	2.94926e-16
WBGene00001068	dpy-6	protein_coding	X	8450378	DumPY: shorter than wild-type	158.71	-2.66605	0.194159	-8.60338	7.74004e-18	8.52258e-16
WBGene00019148	H03E18.1	protein_coding	X	8507876		101.57	-3.23299	0.258766	-8.57327	1.0059e-17	1.10001e-15
WBGene00003175	mec-12	protein_coding	III	3131574	Tubulin alpha-3 chain	804.142	-1.85716	0.100688	-8.55303	1.19897e-17	1.29343e-15
WBGene00014182	ZK1025.2	protein_coding	I	11449856		55.7174	-4.49307	0.382166	-8.42595	3.57836e-17	3.73412e-15
WBGene00000699	col-125	protein_coding	IV	11225505	COLlagen	200.645	-3.13127	0.258093	-8.33023	8.06822e-17	8.31079e-15
WBGene00020194	T03G6.1	protein_coding	X	2608228		65.6358	-3.76168	0.321517	-8.30426	1.0044e-16	1.02797e-14
WBGene00018969	F56D3.1	protein_coding	II	4142816		80.1804	-3.3013	0.273336	-8.30341	1.01166e-16	1.0288e-14
WBGene00004134	myrf-1	protein_coding	II	10497055	myelin regulatory factor related	518.293	-2.11319	0.137286	-8.17205	3.032e-16	3.00677e-14
WBGene00000039	acn-1	protein_coding	X	5092281	Inactive angiotensin-converting enzyme-related protein	195.626	-2.54209	0.189868	-8.13778	4.02588e-16	3.91934e-14
WBGene00007999	tag-297	protein_coding	II	14627630		88.8211	-3.08347	0.254098	-8.1349	4.1229e-16	3.98946e-14
WBGene00006948	wrt-2	protein_coding	X	3092395	WaRThog (hedgehog-like family)	44.918	-4.17032	0.366666	-7.99605	1.28476e-15	1.19956e-13
WBGene00022680	ZK180.6	protein_coding	IV	4520181		67.5532	-3.37224	0.297013	-7.8271	4.99237e-15	4.45297e-13
WBGene00003057	lon-3	protein_coding	V	12197433	Cuticle collagen lon-3	53.9316	-3.74832	0.339005	-7.79543	6.41909e-15	5.66228e-13
WBGene00001716	grl-7	protein_coding	V	11344817	GRound-Like (grd related)	57.9621	-3.80872	0.347619	-7.79327	6.52957e-15	5.72809e-13
WBGene00019520	K08B12.1	protein_coding	V	6259407		49.3654	-3.8875	0.355237	-7.71883	1.17405e-14	1.01874e-12
WBGene00019855	R03H10.2	protein_coding	II	4155772		81.0264	-2.89081	0.243607	-7.68506	1.52922e-14	1.2987e-12
WBGene00006534	tba-8	protein_coding	X	9455489	Tubulin alpha-8 chain	39.2026	-4.53779	0.4102	-7.67205	1.69265e-14	1.42236e-12
WBGene00000745	col-172	protein_coding	X	6672830	COLlagen	55.7437	-3.62283	0.332139	-7.57922	3.47628e-14	2.84627e-12
WBGene00022274	Y73E7A.8	protein_coding	I	1634740		43.7374	-4.0461	0.372716	-7.50189	6.29057e-14	5.09824e-12
WBGene00007490	mks-5	protein_coding	II	10720231		52.4276	-4.82285	0.493508	-7.49276	6.74407e-14	5.41085e-12
WBGene00004224	ptr-10	protein_coding	I	5662143	PaTched Related family	44.3507	-3.86594	0.370031	-7.24938	4.18696e-13	3.1682e-11
WBGene00004232	ptr-18	protein_coding	II	12965568	PaTched Related family	94.2631	-2.59275	0.220206	-7.23141	4.78022e-13	3.58314e-11
WBGene00002827	let-653	protein_coding	IV	11885530	Let-653 protein; Uncharacterized protein	151.467	-2.15876	0.161251	-7.22011	5.19467e-13	3.83973e-11
WBGene00000989	dhs-26	protein_coding	X	3360685	DeHydrogenases, Short chain	139.369	-4.34644	0.464137	-7.17196	7.39332e-13	5.39003e-11
WBGene00020846	T27A10.6	protein_coding	X	3588857		155.359	-2.39953	0.197043	-7.16617	7.71241e-13	5.59711e-11
WBGene00010673	K08E7.5	protein_coding	IV	12573370		34.3677	-4.20321	0.404395	-7.13626	9.59035e-13	6.83569e-11
WBGene00001397	fat-5	protein_coding	V	17725002	Delta(9)-fatty-acid desaturase fat-5	2644.56	-2.26061	0.182367	-7.1372	9.52546e-13	6.83569e-11
WBGene00004773	sem-4	protein_coding	I	7038900	SEM-4 long form; Uncharacterized protein	438.126	-1.72345	0.10189	-7.13313	9.81106e-13	6.96193e-11
WBGene00017788	F25E5.7	protein_coding	V	7440107		50.1258	-3.30749	0.314532	-7.10243	1.22587e-12	8.66025e-11
WBGene00000611	col-34	protein_coding	IV	4243548	Cuticle collagen 34	217.641	-2.20743	0.171771	-7.09347	1.30786e-12	9.1585e-11
WBGene00016274	C30G12.2	protein_coding	II	7290373		1203.26	-2.07231	0.153724	-7.05635	1.70939e-12	1.17639e-10
WBGene00003171	mec-7	protein_coding	X	7774856	Tubulin beta-1 chain	877.033	-1.6544	0.0933566	-7.04483	1.85694e-12	1.267e-10
WBGene00013852	hhat-1	protein_coding	II	14678468	Homolog of Hedgehog AcylTransferase	47.5175	-3.52817	0.350831	-6.95153	3.61337e-12	2.41385e-10
WBGene00000743	col-170	protein_coding	X	6331620	COLlagen	37.6789	-4.01797	0.407041	-6.86551	6.62543e-12	4.33531e-10
WBGene00001059	dpf-6	protein_coding	III	8038241	Dipeptidyl peptidase family member 6	347.634	-2.32968	0.198377	-6.8316	8.39744e-12	5.42808e-10
WBGene00000399	cdh-7	protein_coding	II	14843218	CaDHerin family	42.9201	-4.29246	0.428583	-6.81124	9.67628e-12	6.20448e-10
WBGene00017499	pud-1.1	protein_coding	V	2330429	Protein Up-regulated in Daf-2(gf)	3146.54	-3.76527	0.425117	-6.80613	1.00258e-11	6.37739e-10
WBGene00008963	F19H8.2	protein_coding	II	14604145		144.449	-2.1441	0.16938	-6.78745	1.14134e-11	7.23121e-10
WBGene00020554	T19A5.3	protein_coding	V	8939591		72.7098	-3.2381	0.331258	-6.71503	1.88021e-11	1.15905e-09
WBGene00000641	col-65	protein_coding	I	11489158	COLlagen	33.8343	-4.23961	0.43488	-6.61889	3.61894e-11	2.16405e-09
WBGene00011107	R07E3.6	protein_coding	X	10317722		78.9434	-2.74746	0.265634	-6.58206	4.63974e-11	2.76411e-09
WBGene00044617	bus-1	protein_coding	V	9022319		38.3318	-3.47303	0.359559	-6.56304	5.2722e-11	3.11763e-09
WBGene00006956	wrt-10	protein_coding	II	7533300	WaRThog (hedgehog-like family)	180.299	-3.64229	0.410306	-6.52047	7.00875e-11	4.08401e-09
WBGene00044074	mltn-5	protein_coding	II	13925268	MLt-TeN (mlt-10) related	30.1129	-4.73283	0.474449	-6.50352	7.84637e-11	4.53896e-09
WBGene00001188	egl-20	protein_coding	IV	9812444	Uncharacterized protein; Wnt homolog	379.8	-1.67	0.106032	-6.345	2.22421e-10	1.24167e-08
WBGene00013173	Y53F4B.27	protein_coding	II	15145948		28.2405	-4.08449	0.429746	-6.33679	2.34608e-10	1.29611e-08
WBGene00015339	C02E7.6	protein_coding	V	4919207		28.3992	-4.08106	0.439465	-6.26758	3.66695e-10	1.97126e-08
WBGene00017421	cutl-29	protein_coding	X	8262423	CUTiclin-Like	46.484	-2.85738	0.295225	-6.19026	6.00649e-10	3.20735e-08
WBGene00003681	nhr-91	protein_coding	X	15309374	Nuclear hormone receptor family member nhr-91	105.373	-2.28017	0.210989	-6.10721	1.01387e-09	5.3248e-08
WBGene00015795	C15F1.2	protein_coding	II	6979951		59.5291	-2.80014	0.293957	-6.09893	1.06781e-09	5.58973e-08
WBGene00020561	T19C3.3	protein_coding	III	610878		76.5191	-2.41103	0.23253	-6.07665	1.22718e-09	6.36144e-08
WBGene00018737	F53B1.4	protein_coding	X	2111778		47.3222	-3.13231	0.345895	-6.06841	1.29181e-09	6.65838e-08
WBGene00018468	tag-80	protein_coding	IV	7588931	LOW QUALITY PROTEIN: Uncharacterized protein CELE_F45E4.3	221.058	-1.84713	0.140768	-6.05098	1.43968e-09	7.34377e-08
WBGene00000220	atf-2	protein_coding	II	8751986	ATF (cAMP-dependent transcription factor) family	58.3009	-2.6471	0.272316	-6.02848	1.65514e-09	8.38918e-08
WBGene00000599	col-10	protein_coding	V	9164295	Cuticle collagen 10	993.573	-1.7862	0.13188	-6.02585	1.68219e-09	8.49933e-08
WBGene00020083	R57.2	protein_coding	X	297248		32.2305	-3.45563	0.392686	-5.92875	3.05242e-09	1.50882e-07
WBGene00022517	ZC123.1	protein_coding	I	837996		45.2331	-3.03572	0.339675	-5.91626	3.29339e-09	1.62291e-07
WBGene00015841	skpo-2	protein_coding	II	3431286	ShK domain and PerOxidase domain containing protein	29.3255	-3.64092	0.414223	-5.90471	3.5327e-09	1.73548e-07
WBGene00016013	C23G10.6	protein_coding	III	6192121	UDP-glucuronosyltransferase	1181.73	-3.00759	0.360058	-5.89188	3.81828e-09	1.87002e-07
WBGene00002243	lad-2	protein_coding	IV	2964407	L1 CAM ADhesion molecule homolog	96.8424	-2.11931	0.195557	-5.74779	9.04174e-09	4.30927e-07
WBGene00009653	F43D9.1	protein_coding	III	10488128		57.6791	-2.68199	0.293937	-5.72988	1.00504e-08	4.76154e-07
WBGene00018297	F41F3.3	protein_coding	V	4647661		290.304	-3.54571	0.453459	-5.71219	1.11533e-08	5.26843e-07
WBGene00021415	nsy-4	protein_coding	IV	2324058	Neuronal SYmmetry	113.588	-2.01299	0.179283	-5.69073	1.26497e-08	5.95192e-07
WBGene00010742	K10D6.2	protein_coding	V	11193735		263.969	-1.65897	0.117523	-5.64622	1.64018e-08	7.54672e-07
WBGene00000741	col-168	protein_coding	X	6326191	COLlagen	84.3013	-2.51608	0.269602	-5.63109	1.79079e-08	8.1925e-07
WBGene00017068	D2092.8	protein_coding	I	6620665		23.3639	-4.16487	0.478686	-5.62037	1.90549e-08	8.67601e-07
WBGene00017307	F09F9.2	protein_coding	X	4110433		35.8377	-2.95127	0.338725	-5.58672	2.314e-08	1.04365e-06
WBGene00011548	T06G6.6	protein_coding	I	12718309		21.1014	-4.20166	0.480836	-5.58564	2.3284e-08	1.04425e-06
WBGene00001399	fat-7	protein_coding	V	7151356	Delta(9)-fatty-acid desaturase fat-7	3156.16	-2.26141	0.242916	-5.58603	2.32325e-08	1.04425e-06
WBGene00022415	Y102A11A.5	protein_coding	X	2030959		64.1349	-2.63921	0.294084	-5.57697	2.44748e-08	1.09152e-06
WBGene00010835	M03B6.3	protein_coding	X	13860761		82.7928	-2.15454	0.210042	-5.52714	3.25496e-08	1.4356e-06
WBGene00011836	mam-4	protein_coding	V	11248146	MAM (Meprin, A5-protein, PTPmu) domain protein	31.8305	-3.38731	0.412217	-5.49807	3.83964e-08	1.68881e-06
WBGene00020033	R12E2.7	protein_coding	I	4153957		32.8217	-3.1659	0.381032	-5.48502	4.13426e-08	1.80843e-06
WBGene00004127	abu-12	protein_coding	X	450445	Activated in Blocked Unfolded protein response	27.5764	-3.38891	0.412453	-5.48114	4.22582e-08	1.84343e-06
WBGene00017018	D1014.5	protein_coding	V	8123684		30.4776	-3.49396	0.432618	-5.46397	4.65607e-08	2.02558e-06
WBGene00019212	H19M22.3	protein_coding	III	2636405		49.6166	-2.5218	0.279013	-5.4567	4.85072e-08	2.10453e-06
WBGene00000742	col-169	protein_coding	X	6329160	COLlagen	46.3977	-2.88862	0.346168	-5.40586	6.4497e-08	2.77563e-06
WBGene00017716	F22F4.1	protein_coding	X	6004483		42.8667	-2.65931	0.305303	-5.38696	7.16602e-08	3.05916e-06
WBGene00017535	atf-8	protein_coding	V	6105675	ATF (cAMP-dependent transcription factor) family	24.3953	-3.45716	0.425731	-5.373	7.74372e-08	3.28817e-06
WBGene00007916	C34C6.3	protein_coding	II	8691922		58.9003	-2.50619	0.282573	-5.36351	8.16185e-08	3.44741e-06
WBGene00000746	col-173	protein_coding	X	6875167	COLlagen	27.2633	-3.20261	0.392314	-5.32408	1.01463e-07	4.24074e-06
WBGene00001556	gcy-36	protein_coding	X	15479017	Soluble guanylate cyclase gcy-36	27.9848	-3.2057	0.398893	-5.29012	1.22235e-07	5.08231e-06
WBGene00000702	col-128	protein_coding	IV	11550001	COLlagen	25.4901	-3.25616	0.408433	-5.23886	1.61571e-07	6.56398e-06
WBGene00022591	cuti-1	protein_coding	I	6404587	CUTicle and epithelial Integrity	59.9862	-2.40836	0.271064	-5.2232	1.75857e-07	7.1082e-06
WBGene00017418	F13B6.3	protein_coding	IV	7461964		658.223	-1.44013	0.0854122	-5.17662	2.25945e-07	9.06392e-06
WBGene00011838	T19C4.1	protein_coding	V	11149707		54.6955	-2.28976	0.250867	-5.12817	2.92571e-07	1.15623e-05
WBGene00050875	bah-1	protein_coding	I	11465142	Biofilm Absent on Head (after Yersinia exposure)	20.0158	-4.69212	0.540924	-5.09825	3.42807e-07	1.34478e-05
WBGene00001898	his-24	protein_coding	X	14490107	Histone H1.1	287.102	-1.73279	0.145933	-5.07704	3.83364e-07	1.49287e-05
WBGene00001557	gcy-37	protein_coding	IV	2150650	Soluble guanylate cyclase gcy-37	25.9979	-3.06757	0.395239	-5.028	4.95635e-07	1.90682e-05
WBGene00001079	dpy-20	protein_coding	IV	11696781		18.5661	-3.83241	0.48857	-5.0168	5.25402e-07	2.01165e-05
WBGene00008851	F15B9.8	protein_coding	V	12988532		48.5688	-2.97594	0.394393	-5.0155	5.28951e-07	2.01557e-05
WBGene00012939	Y47D3B.1	protein_coding	III	11382281		22.6063	-3.18899	0.417828	-4.95107	7.38063e-07	2.76618e-05
WBGene00012032	T26C5.2	protein_coding	II	9233223		44.1364	-2.60673	0.325457	-4.9335	8.07673e-07	3.01998e-05
WBGene00022033	Y65B4BL.1	protein_coding	I	530969		86.9554	-3.39369	0.508682	-4.92085	8.61691e-07	3.19948e-05
WBGene00016133	C26B9.3	protein_coding	X	5338273		56.6722	-2.21584	0.253903	-4.83048	1.36206e-06	4.99921e-05
WBGene00007264	C02F4.4	protein_coding	IV	10513890		20.9772	-3.38337	0.458737	-4.81021	1.50772e-06	5.50854e-05
WBGene00017438	F13H8.5	protein_coding	II	6252774		30.5582	-2.79413	0.370918	-4.75961	1.93971e-06	7.01035e-05
WBGene00008762	ztf-2	protein_coding	I	7291272	Zinc finger putative Transcription Factor family	51.2906	-2.3483	0.288735	-4.72713	2.27718e-06	8.13366e-05
WBGene00002393	lpr-1	protein_coding	I	557431	LiPocalin-Related protein	70.8379	-2.10924	0.240107	-4.70423	2.54824e-06	9.00114e-05
WBGene00019318	K02E10.4	protein_coding	X	2483263		36.1157	-2.67284	0.354562	-4.70149	2.58275e-06	9.10292e-05
WBGene00018487	F46C8.8	protein_coding	X	7551202		23.1751	-3.07583	0.424064	-4.69456	2.67186e-06	9.37558e-05
WBGene00001552	gcy-32	protein_coding	V	13912080	Soluble guanylate cyclase gcy-32	19.4874	-4.40866	0.511938	-4.65492	3.24101e-06	0.000112247
WBGene00000681	col-107	protein_coding	IV	1548724	COLlagen	276.146	-1.53974	0.116665	-4.63531	3.56403e-06	0.000122373
WBGene00006947	wrt-1	protein_coding	II	7531155	Warthog protein 1 Warthog protein 1 N-product Warthog protein 1 C-product	66.1567	-2.53627	0.336995	-4.61067	4.0137e-06	0.000136929
WBGene00010267	lips-9	protein_coding	II	12933855	LIPaSe related	15.7536	-3.72298	0.505014	-4.6008	4.20878e-06	0.000142669
WBGene00003703	nhr-113	protein_coding	I	11473218	Nuclear Hormone Receptor family	17.7259	-3.2377	0.453915	-4.55045	5.35314e-06	0.000179555
WBGene00001690	grd-1	protein_coding	X	11109450	GRounDhog (hedgehog-like family)	30.1347	-2.55964	0.338635	-4.53006	5.89671e-06	0.000197373
WBGene00018295	oac-29	protein_coding	V	8631892	O-ACyltransferase homolog	21.8292	-2.98621	0.419176	-4.52302	6.0963e-06	0.000203627
WBGene00019285	cbn-1	protein_coding	II	328564	Calcium BiNding protein homolog	24.1331	-2.96354	0.418267	-4.52116	6.15006e-06	0.000204566
WBGene00001714	grl-5	protein_coding	V	4412747	GRound-Like (grd related)	15.9343	-3.88157	0.529088	-4.51314	6.38759e-06	0.000211586
WBGene00020560	T19C3.2	protein_coding	III	614707		28.3359	-2.68647	0.362769	-4.51101	6.45183e-06	0.000213271
WBGene00000623	col-46	protein_coding	I	741879	COLlagen	15.4559	-4.04993	0.536632	-4.50457	6.65061e-06	0.000218935
WBGene00010516	K02E11.7	protein_coding	V	14253488		87.9835	-1.83586	0.188037	-4.46586	7.97467e-06	0.000259844
WBGene00012429	Y11D7A.5	protein_coding	IV	9244511		17.3524	-3.27617	0.470213	-4.45811	8.26846e-06	0.000268868
WBGene00019759	M03F4.6	protein_coding	X	4964409		41.6194	-2.31647	0.298173	-4.45311	8.46367e-06	0.000274099
WBGene00009261	F30A10.2	protein_coding	I	9479108		20.0728	-2.95517	0.424178	-4.38963	1.13544e-05	0.000363294
WBGene00011763	T14B1.1	protein_coding	X	9664538		148.414	-1.71512	0.165902	-4.37219	1.23007e-05	0.000392001
WBGene00000133	amt-1	protein_coding	X	4571448	Putative ammonium transporter 1	33.7139	-2.65065	0.370912	-4.36031	1.29881e-05	0.000413083
WBGene00000170	aqp-2	protein_coding	II	9258913	AQuaPorin or aquaglyceroporin related	1326.84	-1.3304	0.0766173	-4.35457	1.33328e-05	0.000422363
WBGene00009375	F34D10.6	protein_coding	III	3747560		62.2884	-2.11094	0.262724	-4.3431	1.40485e-05	0.000443211
WBGene00001135	eat-4	protein_coding	III	9136916	Probable vesicular glutamate transporter eat-4	73.1411	-1.94498	0.219984	-4.33939	1.4288e-05	0.000448178
WBGene00009133	bed-3	protein_coding	IV	9916528	BED-type zinc finger putative transcription factor	111.35	-1.75908	0.178007	-4.32122	1.5517e-05	0.000476432
WBGene00021731	Y49G5A.1	protein_coding	V	5286343		83.4397	-2.14765	0.269193	-4.29661	1.73433e-05	0.000527433
WBGene00010345	F59F5.7	protein_coding	X	10559535		27.2588	-2.48031	0.34018	-4.29375	1.75678e-05	0.000533245
WBGene00019730	asns-2	protein_coding	X	8748431	Asparagine synthetase	766.973	-1.59422	0.140979	-4.29151	1.77463e-05	0.000537642
WBGene00015300	C01F1.5	protein_coding	II	4279789		15.2448	-3.30041	0.488676	-4.2824	1.84888e-05	0.000559075
WBGene00022038	Y65B4BL.6	protein_coding	I	520113		19.9821	-2.7541	0.400683	-4.24775	2.15925e-05	0.000644385
WBGene00015523	ztf-30	protein_coding	III	8595368	Zinc finger transcription factor family protein 30	18.6848	-2.93021	0.434176	-4.24479	2.18793e-05	0.000651727
WBGene00003178	mec-17	protein_coding	IV	7983862	Alpha-tubulin N-acetyltransferase 1	617.029	-1.37585	0.0897466	-4.22002	2.44286e-05	0.000720936
WBGene00000704	col-130	protein_coding	IV	12427505	COLlagen	59.7183	-2.10802	0.269922	-4.21412	2.50759e-05	0.000738676
WBGene00001174	egl-5	protein_coding	III	7814382	Homeobox protein egl-5	77.5099	-1.9429	0.227646	-4.20729	2.5845e-05	0.000755752
WBGene00017570	F18E9.4	protein_coding	X	8580656		24.4734	-2.60758	0.377642	-4.19318	2.75076e-05	0.000801433
WBGene00000749	col-176	protein_coding	X	10077613	COLlagen	62.8016	-2.0247	0.24754	-4.18647	2.83325e-05	0.000820975
WBGene00000493	che-14	protein_coding	I	5746725	CHE-14 protein; Uncharacterized protein	56.5444	-2.08997	0.271195	-4.11298	3.90581e-05	0.00111557
WBGene00001820	ham-1	protein_coding	IV	12542034		58.3128	-2.05758	0.261007	-4.11151	3.93085e-05	0.00112071
WBGene00021023	W04B5.6	protein_coding	III	2433550		13.6644	-3.38159	0.512873	-4.10491	4.04465e-05	0.00114905
WBGene00014009	lips-6	protein_coding	IV	12014283	LIPaSe related	13.1826	-3.27917	0.496223	-4.07065	4.68828e-05	0.00132249
WBGene00021931	Y55F3AM.14	protein_coding	IV	1058845		17.0008	-3.06295	0.480718	-4.06671	4.76811e-05	0.00134028
WBGene00002048	ida-1	protein_coding	III	5755539	related to Islet cell Diabetes Autoantigen	727.68	-1.37879	0.0945568	-4.05825	4.94428e-05	0.00138249
WBGene00015646	mlt-10	protein_coding	II	546705		122.673	-1.9469	0.243573	-4.03575	5.4428e-05	0.00150868
WBGene00007552	C13C12.2	protein_coding	V	12523647		15.1285	-3.12035	0.485768	-4.03155	5.54109e-05	0.00153326
WBGene00021529	Y41G9A.5	protein_coding	X	2946667		107.249	-1.91458	0.236016	-4.01448	5.95761e-05	0.00162686
WBGene00007177	oac-1	protein_coding	V	19551016	O-ACyltransferase homolog	11.9	-3.37406	0.512969	-4.00974	6.07861e-05	0.00165334
WBGene00009218	acs-20	protein_coding	IV	12392123	fatty Acid CoA Synthetase family	276.746	-1.46275	0.118909	-3.94604	7.94557e-05	0.00212494
WBGene00044109	K02E11.10	protein_coding	V	14239924		13.6946	-3.09524	0.487795	-3.91505	9.03869e-05	0.00239323
WBGene00012433	Y11D7A.9	protein_coding	IV	9254260		37.9652	-2.1702	0.302001	-3.91079	9.19938e-05	0.00243174
WBGene00007174	mboa-1	protein_coding	X	16030806	O-acyltransferase	34.5665	-2.17037	0.302278	-3.89248	9.92244e-05	0.00259708
WBGene00013891	ZC434.3	protein_coding	I	10334659		19.988	-2.63934	0.415986	-3.84218	0.000121947	0.00315561
WBGene00015781	C14F11.6	protein_coding	X	6238021		36.9028	-2.24039	0.325547	-3.81708	0.000135039	0.00345519
WBGene00001710	grl-1	protein_coding	V	5530723	GRound-Like (grd related)	14.4746	-3.03209	0.49206	-3.81193	0.000137889	0.00351682
WBGene00008743	F13D12.9	protein_coding	II	11707451		43.8803	-2.18704	0.32224	-3.8035	0.000142668	0.00362137
WBGene00008496	F01D5.6	protein_coding	II	14006511		20.9886	-2.59743	0.416538	-3.78212	0.000155499	0.00391593
WBGene00006970	zag-1	protein_coding	IV	3855843	Zinc finger E-box-binding homeobox protein zag-1	105.024	-1.65457	0.176503	-3.74391	0.000181179	0.00450578
WBGene00016671	C45G7.4	protein_coding	IV	2432993		29.0818	-2.5028	0.414473	-3.74124	0.000183112	0.0045397
WBGene00020156	T02B11.4	protein_coding	V	869071		59.3818	-2.29995	0.367157	-3.73482	0.000187851	0.00464276
WBGene00020855	hpo-36	protein_coding	V	3727260		52.7777	-2.13725	0.316889	-3.72229	0.000197423	0.00485212
WBGene00001063	dpy-1	protein_coding	III	2034977	DumPY: shorter than wild-type	23.3027	-2.53807	0.415007	-3.71179	0.000205799	0.00503955
WBGene00004048	plx-2	protein_coding	II	14417888	Plexin-2	127.325	-1.63013	0.173975	-3.68875	0.000225358	0.00547651
WBGene00001475	fmi-1	protein_coding	V	13019068	FlaMIngo (cadherin plus 7TM domain) homolog	196.41	-1.48235	0.133956	-3.65137	0.000260843	0.00627203
WBGene00044471	F56D6.9	protein_coding	IV	3892998		15.955	-2.94344	0.5311	-3.59435	0.000325201	0.00770351
WBGene00001691	grd-2	protein_coding	V	20609863	GRounDhog (hedgehog-like family)	10.9616	-3.29881	0.565599	-3.59164	0.000328606	0.00777263
WBGene00003663	nhr-73	protein_coding	I	11433671	Nuclear Hormone Receptor family	7.55776	-2.82384	0.623756	-3.58505	0.000337017	0.00794802
WBGene00000902	daf-6	protein_coding	X	14888487		37.0874	-2.19198	0.347455	-3.57198	0.000354288	0.00828193
WBGene00017336	ugt-41	protein_coding	V	7161068	UDP-GlucuronosylTransferase	804.767	-1.63638	0.187472	-3.57265	0.000353389	0.00828193
WBGene00138711	R07B1.13	protein_coding	X	9869836		10.7182	-3.17926	0.543901	-3.56887	0.00035852	0.00836861
WBGene00016329	osr-1	protein_coding	I	5200258	Osmotic stress resistance protein; Uncharacterized protein	24.4589	-2.28324	0.359973	-3.54771	0.00038859	0.00901777
WBGene00004229	ptr-15	protein_coding	V	6966395	PaTched Related family	33.1513	-2.15429	0.335538	-3.54123	0.000398264	0.00921549
WBGene00013104	Y51H4A.8	protein_coding	IV	16575098		183.376	-1.59042	0.169979	-3.52915	0.000416892	0.00960476
WBGene00009843	F48C5.2	protein_coding	X	11452038		37.0755	-1.98968	0.289157	-3.48631	0.000489728	0.0110908
WBGene00020609	T20D4.3	protein_coding	V	3418263		41.4741	-2.27802	0.389069	-3.47597	0.000509001	0.0114622
WBGene00021389	Y38A10A.2	protein_coding	V	6057364		33.7053	-2.09535	0.321639	-3.47292	0.000514824	0.011577
WBGene00009304	eva-1	protein_coding	I	14829667		96.7896	-1.61661	0.183258	-3.41455	0.00063888	0.0141672
WBGene00021002	W03F9.4	protein_coding	V	147526		44.123	-1.95807	0.289794	-3.40026	0.000673226	0.0148668
WBGene00235268	Y54G2A.76	protein_coding	IV	2809446		17.6043	-2.53087	0.436502	-3.39724	0.000680701	0.0149904
WBGene00000213	asm-3	protein_coding	IV	520210	Putative sphingomyelin phosphodiesterase asm-3	42.4341	-2.03214	0.309739	-3.37567	0.000736349	0.0160609
WBGene00016962	C56C10.4	protein_coding	II	6583039		14.672	-2.83875	0.530741	-3.37237	0.000745249	0.0162328
WBGene00007170	B0393.5	protein_coding	III	4765833		85.4178	-1.73359	0.229605	-3.33495	0.000853144	0.0184321
WBGene00001549	gcy-25	protein_coding	IV	15872933	Receptor-type guanylate cyclase gcy-25	6.31464	-3.47864	0.609387	-3.31979	0.000900846	0.0192809
WBGene00006742	unc-2	protein_coding	X	2710920	High voltage activated calcium channel alpha-1 subunit; Uncharacterized protein	395.68	-1.53759	0.166962	-3.31357	0.000921145	0.0196881
WBGene00008292	C54C8.4	protein_coding	I	12449992		6.14928	-3.61399	0.621633	-3.30792	0.000939922	0.0200626
WBGene00021480	Y39H10A.4	protein_coding	V	3733143		18.4937	-2.38067	0.425032	-3.29919	0.000969642	0.0206143
WBGene00022374	nhr-277	protein_coding	IV	2743007	Nuclear Hormone Receptor family	25.2446	-2.17076	0.361116	-3.28676	0.00101348	0.0214891
WBGene00014143	ZK899.5	protein_coding	X	9459911		4.35905	-2.75906	0.609458	-3.28043	0.0010365	0.021948
WBGene00012892	Y45F10D.14	protein_coding	IV	13804062		14.1746	-2.55545	0.4816	-3.23587	0.00121273	0.0254768
WBGene00012540	Y37A1B.7	protein_coding	IV	14042593		21.0614	-2.47289	0.444378	-3.23425	0.00121962	0.025588
WBGene00020728	T23E1.1	protein_coding	IV	3151361		16.1552	-2.48596	0.458098	-3.22709	0.00125057	0.0261002
WBGene00016619	C43H6.6	protein_coding	X	2395505		6.14615	-3.20817	0.594995	-3.21114	0.00132207	0.0274847
WBGene00011235	suro-1	protein_coding	I	7871584	SUPpressor of ROller	78.0117	-1.76342	0.245976	-3.20983	0.00132814	0.027539
WBGene00016259	C30F8.3	protein_coding	I	5096601		11.2695	-2.6735	0.499812	-3.20343	0.001358	0.0280853
WBGene00014008	ZK596.3	protein_coding	IV	10902083		18.2649	-2.29265	0.408399	-3.20094	0.00136978	0.0282558
WBGene00000726	col-153	protein_coding	V	10949898	COLlagen	141.945	-1.46756	0.149704	-3.18226	0.00146132	0.029989
WBGene00000649	col-73	protein_coding	II	4872098	COLlagen	101.087	-1.95643	0.313832	-3.17256	0.00151102	0.0308898
WBGene00018256	cutl-28	protein_coding	IV	684497	CUTiclin-Like	18.7741	-2.32503	0.421931	-3.17088	0.00151976	0.0310288
WBGene00016196	C28H8.5	protein_coding	III	5884307		5.87477	-3.11998	0.60527	-3.1058	0.00189766	0.0376374
WBGene00004212	ptl-1	protein_coding	III	763810	Microtubule-associated protein	288.126	-1.33565	0.112041	-3.03596	0.00239772	0.0464587
WBGene00001464	flp-21	protein_coding	V	7793365	FMRF-Like Peptide	55.0564	-1.80427	0.280826	-3.0289	0.00245449	0.047501
WBGene00007210	agmo-1	protein_coding	III	12793384	Alkylglycerol monooxygenase homolog	24.3361	-2.05507	0.355355	-3.0233	0.00250038	0.0482721
WBGene00044620	bus-4	protein_coding	IV	4688267		15.5991	-2.37091	0.452859	-3.02274	0.00250498	0.0483025
WBGene00003089	ltd-1	protein_coding	II	8088494	Lim and Transglutaminase Domain	187.526	-1.40142	0.135642	-3.01621	0.00255953	0.0491762
WBGene00000739	col-166	protein_coding	X	6279832	COLlagen	1644.03	-1.37894	0.128796	-3.01456	0.00257354	0.0493266

## Sheet: raw_counts
	10578X1	10578X2	10578X3	10578X7	10578X8	10578X9
WBGene00000001	3053	3131	2696	1486	1412	1353
WBGene00000002	65	88	71	65	52	50
WBGene00000003	200	222	217	105	73	63
WBGene00000004	637	579	472	184	166	164
WBGene00000005	287	308	292	281	243	251
WBGene00000006	205	244	225	81	59	67
WBGene00000007	265	325	344	411	378	335
WBGene00000008	16	6	4	14	19	13
WBGene00000009	18	15	20	20	11	20
WBGene00000010	1556	1426	1173	620	538	571
WBGene00000012	3	6	6	4	5	4
WBGene00000013	4	7	9	15	7	13
WBGene00000015	13	8	11	4	8	3
WBGene00000016	13	16	9	33	25	31
WBGene00000017	10	16	11	10	5	8
WBGene00000018	674	550	440	274	227	215
WBGene00000019	19	18	19	11	19	15
WBGene00000020	590	552	489	468	447	354
WBGene00000022	1390	1410	1349	1943	1623	1544
WBGene00000023	14	8	8	10	6	3
WBGene00000024	0	0	0	0	0	0
WBGene00000025	1	0	0	1	0	1
WBGene00000026	0	3	0	0	0	0
WBGene00000027	2	2	1	0	0	0
WBGene00000029	0	0	0	0	0	0
WBGene00000030	0	1	0	1	0	0
WBGene00000031	0	1	2	3	2	2
WBGene00000032	4	3	6	1	2	0
WBGene00000033	1	0	0	0	0	1
WBGene00000034	6	5	7	4	5	2
WBGene00000035	190	202	214	144	99	112
WBGene00000036	403	374	419	223	155	155
WBGene00000037	49	38	48	26	21	26
WBGene00000038	0	1	1	0	1	0
WBGene00000039	972	938	765	74	49	56
WBGene00000040	5336	5132	4908	4804	4055	3400
WBGene00000041	25578	22128	18457	11458	10753	9597
WBGene00000042	24	28	22	6	8	5
WBGene00000043	4	6	6	5	8	4
WBGene00000044	45	55	45	14	10	6
WBGene00000045	2	3	1	1	1	0
WBGene00000046	21	21	24	8	4	12
WBGene00000047	38	40	45	29	19	23
WBGene00000048	5	6	8	1	2	1
WBGene00000049	6	7	6	3	5	1
WBGene00000050	37	43	40	47	22	25
WBGene00000051	58	56	64	50	40	28
WBGene00000053	3	7	5	0	2	2
WBGene00000054	24	28	37	26	26	30
WBGene00000055	106	117	106	43	33	40
WBGene00000056	26	31	20	9	8	17
WBGene00000057	17	19	36	31	23	16
WBGene00000058	39	47	42	12	5	12
WBGene00000059	105	133	101	50	46	71
WBGene00000060	32	33	30	2	5	5
WBGene00000061	2	1	3	1	0	2
WBGene00000062	33	44	34	9	7	9
WBGene00000063	21572	20288	19049	12746	12520	10782
WBGene00000064	37428	30443	23981	11819	11949	11792
WBGene00000065	20621	19248	17138	9951	9462	9648
WBGene00000066	14223	14085	14688	11030	9603	8816
WBGene00000067	10405	10508	11597	12359	10849	9080
WBGene00000068	309	359	325	152	100	108
WBGene00000069	37	23	34	29	16	18
WBGene00000070	386	423	335	233	226	237
WBGene00000071	323	296	294	321	249	257
WBGene00000072	319	330	327	312	258	261
WBGene00000073	661	738	620	453	346	347
WBGene00000074	819	665	511	414	327	353
WBGene00000075	787	659	518	330	276	312
WBGene00000079	3489	3321	2804	1595	1397	1522
WBGene00000080	3062	3564	3180	1736	1647	1705
WBGene00000081	3667	3869	4078	4652	3796	3252
WBGene00000082	90	99	85	17	15	17
WBGene00000083	1267	1290	1229	541	447	444
WBGene00000084	590	591	614	747	603	620
WBGene00000085	40	37	39	9	7	9
WBGene00000086	380	356	393	267	220	204
WBGene00000088	423	496	443	433	328	330
WBGene00000089	214	181	212	135	113	108
WBGene00000090	2850	2351	1786	955	827	948
WBGene00000092	878	820	742	358	325	296
WBGene00000093	747	1008	1002	584	511	463
WBGene00000094	843	1040	771	361	366	437
WBGene00000095	653	699	704	309	315	284
WBGene00000096	96	103	87	18	15	17
WBGene00000097	1685	2091	1903	999	939	948
WBGene00000098	9270	10267	9187	4852	4640	4428
WBGene00000099	2409	2385	2027	1182	1110	1071
WBGene00000100	2518	2284	2100	1453	1322	1164
WBGene00000101	9298	8462	6597	4023	3594	3893
WBGene00000102	7217	7272	6036	3515	3116	3335
WBGene00000103	443	532	404	191	168	170
WBGene00000105	2008	1725	1422	906	775	702
WBGene00000106	1700	1197	888	464	370	345
WBGene00000107	7242	7730	6744	4691	4034	4070
WBGene00000108	0	0	0	1	0	0
WBGene00000109	3064	3082	2697	2737	2339	2206
WBGene00000110	3792	3993	3640	2701	2254	2220
WBGene00000111	462	553	593	459	306	218
WBGene00000112	1741	1659	1412	854	755	821
WBGene00000113	1069	1103	1080	658	582	521
WBGene00000114	18604	17481	18079	13864	12100	10094
WBGene00000115	3974	4143	4099	2095	2128	2210
WBGene00000116	518	541	592	440	393	371
WBGene00000117	1190	1174	1154	927	778	677
WBGene00000118	2200	2564	2387	1761	1489	1491
WBGene00000120	552	707	604	378	318	234
WBGene00000121	9631	11709	10849	5196	4941	4711
WBGene00000122	6400	7473	6743	3626	3460	3342
WBGene00000123	5128	3887	2712	1217	1144	1072
WBGene00000133	127	114	168	10	16	6
WBGene00000134	13	16	8	6	4	0
WBGene00000135	57	61	69	26	24	24
WBGene00000136	673	726	628	1030	847	829
WBGene00000137	555	518	473	217	221	202
WBGene00000138	260	260	286	238	160	170
WBGene00000139	170	202	245	185	209	225
WBGene00000140	7124	6900	4807	4524	3737	3238
WBGene00000142	4821	5673	5227	2791	2520	2708
WBGene00000143	3131	3398	2959	1652	1477	1554
WBGene00000144	1297	1642	1591	841	827	785
WBGene00000145	1626	2050	2062	972	903	874
WBGene00000146	5919	5124	3865	2314	1911	2075
WBGene00000147	1469	1820	1623	895	830	751
WBGene00000148	2309	2492	2164	1253	1148	1202
WBGene00000149	3762	3919	3367	2087	1796	1714
WBGene00000150	801	901	900	807	658	707
WBGene00000151	2922	3533	3142	1614	1549	1640
WBGene00000155	7981	7912	6794	4389	3995	4032
WBGene00000156	4189	3853	2929	1767	1549	1642
WBGene00000157	715	774	780	464	409	356
WBGene00000158	3133	2989	2456	1550	1378	1435
WBGene00000159	2308	3028	3051	1560	1511	1481
WBGene00000160	3240	2655	2097	1144	1020	1036
WBGene00000161	1987	1734	1481	776	714	685
WBGene00000162	2194	1762	1423	702	615	601
WBGene00000163	3702	3619	2970	1825	1496	1604
WBGene00000164	669	672	595	352	293	283
WBGene00000165	1210	1502	1294	756	677	664
WBGene00000166	36	41	41	17	3	15
WBGene00000168	2746	1960	1383	715	544	594
WBGene00000169	813	955	1012	635	543	454
WBGene00000170	2692	2612	2493	604	517	511
WBGene00000171	34	50	49	40	28	33
WBGene00000172	423	466	495	611	510	433
WBGene00000173	1	0	2	1	0	0
WBGene00000174	17	20	28	15	5	8
WBGene00000175	1986	2134	2075	1997	1575	1231
WBGene00000176	272	301	308	459	302	305
WBGene00000177	158	170	161	148	162	135
WBGene00000178	1305	1535	1512	1087	941	953
WBGene00000179	761	851	858	867	725	726
WBGene00000180	430	429	468	334	280	269
WBGene00000181	5097	5899	6267	4174	3804	3341
WBGene00000182	10701	10763	9831	6455	5628	5817
WBGene00000183	11216	11579	10310	6528	5891	5677
WBGene00000184	921	903	824	445	391	441
WBGene00000185	3	7	0	1	2	0
WBGene00000186	1441	1143	769	411	350	362
WBGene00000187	1797	2074	1991	1227	1095	1123
WBGene00000188	51	35	36	13	10	8
WBGene00000189	721	969	900	444	459	391
WBGene00000190	54	53	41	82	78	77
WBGene00000192	5431	6026	5197	3113	2932	2752
WBGene00000193	4	6	3	3	0	2
WBGene00000195	448	451	381	182	170	149
WBGene00000196	1439	1478	1415	815	784	807
WBGene00000197	12639	11003	8919	4816	4791	4444
WBGene00000198	7045	7841	7651	6683	5393	5160
WBGene00000199	3156	2897	2443	1544	1387	1479
WBGene00000200	4142	4628	3982	2553	2462	2409
WBGene00000201	2652	2607	2154	1399	1159	1254
WBGene00000202	1798	2044	1896	1010	870	934
WBGene00000203	1990	2181	2155	1292	1172	1006
WBGene00000204	2259	2680	2392	1348	1363	1213
WBGene00000205	1032	1240	1245	709	648	581
WBGene00000206	12552	14579	13662	7690	7867	7216
WBGene00000207	4599	4457	4550	3611	3301	2791
WBGene00000208	1305	1236	1166	773	615	583
WBGene00000209	5192	6688	6879	3584	3677	3290
WBGene00000210	3132	3781	4080	3034	2773	2332
WBGene00000211	164	201	186	136	136	128
WBGene00000212	161	180	176	341	305	286
WBGene00000213	121	175	158	19	12	26
WBGene00000214	37683	35116	38285	44668	31198	24630
WBGene00000215	10379	12066	12065	13934	12035	10941
WBGene00000216	17256	18389	18189	27854	22657	20546
WBGene00000217	14831	17378	15976	9403	9598	9758
WBGene00000218	12529	11990	13657	12274	9268	7722
WBGene00000219	25531	23822	23792	37186	27306	24177
WBGene00000220	187	175	148	22	8	10
WBGene00000221	1474	1696	1641	1073	974	1030
WBGene00000222	476	437	367	220	158	193
WBGene00000223	7714	7389	6060	3932	3491	3621
WBGene00000224	916	1004	991	507	425	390
WBGene00000225	662	646	611	228	183	171
WBGene00000226	3530	3443	2635	1597	1497	1618
WBGene00000227	1868	1394	1030	664	559	492
WBGene00000228	2086	2124	2084	2715	2359	2281
WBGene00000229	65331	56691	51835	32584	29025	26358
WBGene00000230	14457	14926	13579	9540	8510	7434
WBGene00000231	7407	5407	4316	2500	2191	2182
WBGene00000232	75	83	82	36	25	35
WBGene00000233	193	221	201	120	80	79
WBGene00000235	3190	3946	3987	2374	2137	1897
WBGene00000236	2061	2743	2705	1393	1278	1245
WBGene00000237	639	651	561	446	389	365
WBGene00000238	223	199	165	168	144	126
WBGene00000239	689	692	751	575	528	529
WBGene00000240	1732	1745	1632	1287	1062	1040
WBGene00000241	27	19	27	5	2	7
WBGene00000242	19	26	28	4	5	3
WBGene00000244	40	48	34	14	9	15
WBGene00000245	834	837	852	503	415	402
WBGene00000246	77	70	77	59	61	57
WBGene00000247	1584	1811	1615	1029	831	823
WBGene00000248	1367	1433	1129	356	373	365
WBGene00000249	1797	2373	2311	1131	998	1010
WBGene00000250	953	903	662	358	344	385
WBGene00000251	9	16	14	12	18	12
WBGene00000252	4	6	6	14	19	6
WBGene00000253	575	546	500	364	297	330
WBGene00000254	6620	6268	5334	3240	2868	2808
WBGene00000255	12	19	9	8	6	6
WBGene00000256	19	23	34	53	54	33
WBGene00000257	3572	3586	2839	1587	1496	1488
WBGene00000259	1680	1914	1621	977	947	988
WBGene00000262	270	226	271	150	133	149
WBGene00000263	6122	7630	8154	4738	4328	3995
WBGene00000264	1486	1446	1053	567	506	621
WBGene00000265	1789	1714	1366	751	684	726
WBGene00000266	630	658	653	706	667	621
WBGene00000267	112	127	122	129	103	87
WBGene00000268	3208	3109	2516	2004	1687	1857
WBGene00000269	455	483	433	259	243	231
WBGene00000270	1115	1480	1323	682	653	659
WBGene00000271	2265	2186	1738	1025	953	1065
WBGene00000272	13	27	9	14	4	14
WBGene00000273	8904	8456	8427	5093	3865	3603
WBGene00000274	2465	1974	1523	855	760	827
WBGene00000275	6869	6172	4813	2716	2622	2546
WBGene00000276	3419	3545	3127	1756	1774	1731
WBGene00000277	3029	3080	3120	1906	1544	1393
WBGene00000279	50	69	76	32	28	39
WBGene00000280	45	51	43	16	12	12
WBGene00000281	1244	1228	1367	1398	1127	1088
WBGene00000282	2054	2168	2438	3880	3269	2925
WBGene00000283	1093	1130	1120	742	713	589
WBGene00000284	102	97	84	13	16	21
WBGene00000285	174	213	214	194	166	181
WBGene00000286	290	336	330	205	154	162
WBGene00000287	11	7	9	11	15	13
WBGene00000288	114	126	106	48	45	37
WBGene00000289	2253	1926	1579	935	798	776
WBGene00000292	3765	4284	3656	2191	1969	2037
WBGene00000293	4358	4582	4251	2551	2432	2478
WBGene00000294	1969	1768	1505	1259	1094	982
WBGene00000295	8	9	8	6	9	7
WBGene00000296	1	3	2	4	4	2
WBGene00000298	1698	1718	1684	1657	1198	979
WBGene00000301	891	1021	891	489	357	305
WBGene00000302	103	106	111	42	41	58
WBGene00000366	6595	5052	3838	2067	1780	1696
WBGene00000367	337	364	313	237	168	153
WBGene00000368	244	253	228	101	89	82
WBGene00000369	3148	2997	2461	1231	1135	1124
WBGene00000370	1586	1700	1715	998	783	784
WBGene00000371	9537	11361	11939	8007	7261	5990
WBGene00000372	83	68	67	128	65	40
WBGene00000373	391	387	431	310	236	205
WBGene00000375	1593	1899	1661	905	883	888
WBGene00000376	11231	9690	7529	4028	3588	3826
WBGene00000377	17009	17881	15775	7604	7887	7889
WBGene00000378	13986	13739	10943	5115	5378	5635
WBGene00000379	16278	16590	13927	7640	7395	7271
WBGene00000380	25375	25648	23217	13632	13136	13165
WBGene00000381	14032	13660	11699	6469	6039	6147
WBGene00000382	3742	4126	3221	1890	1823	1791
WBGene00000383	5355	5038	4130	2397	2101	2186
WBGene00000386	6208	5493	3863	2179	2058	2225
WBGene00000387	1202	991	682	282	210	235
WBGene00000388	1193	1408	1173	521	522	534
WBGene00000389	0	0	1	3	1	0
WBGene00000390	6519	6626	5545	3596	3259	3499
WBGene00000391	82	117	163	104	88	121
WBGene00000392	1495	1939	1953	888	823	814
WBGene00000393	1067	1051	958	563	514	587
WBGene00000395	567	516	365	118	83	92
WBGene00000396	1376	1221	926	363	339	295
WBGene00000397	38	44	27	26	18	14
WBGene00000399	169	159	142	5	3	0
WBGene00000401	65	64	71	16	15	19
WBGene00000402	385	351	283	16	12	12
WBGene00000403	2076	2147	1663	521	436	485
WBGene00000405	9258	10432	9474	4941	4609	4261
WBGene00000406	388	364	373	189	171	181
WBGene00000407	1306	1601	1262	744	677	725
WBGene00000408	2712	3112	2840	1511	1522	1509
WBGene00000409	2761	2798	2478	1437	1240	1230
WBGene00000410	1024	912	782	433	442	409
WBGene00000411	5615	4646	3539	1577	1569	1609
WBGene00000412	61	45	54	69	53	56
WBGene00000413	2029	1789	1385	709	641	653
WBGene00000414	797	808	769	491	422	425
WBGene00000415	2800	2364	2089	1305	1054	1065
WBGene00000416	1837	1655	1397	819	655	749
WBGene00000417	4992	3731	2766	1660	1344	1435
WBGene00000418	1378	1626	1426	786	780	735
WBGene00000419	3916	3088	2301	1513	1348	1450
WBGene00000420	2233	1827	1556	1023	874	808
WBGene00000421	5687	5185	3977	2303	2164	2280
WBGene00000422	287	250	226	121	145	139
WBGene00000423	2137	2332	1983	1045	991	1033
WBGene00000424	1827	1825	1631	975	815	933
WBGene00000425	126	133	126	43	38	40
WBGene00000426	2898	3152	2774	1620	1469	1528
WBGene00000427	0	1	2	0	0	0
WBGene00000428	13	11	11	5	8	9
WBGene00000429	9	11	12	4	7	5
WBGene00000430	37	30	24	26	13	26
WBGene00000431	98	116	106	26	13	24
WBGene00000432	0	1	0	0	0	1
WBGene00000433	4	2	3	1	0	1
WBGene00000434	3	1	3	1	1	1
WBGene00000435	14	17	15	11	18	9
WBGene00000436	1	1	0	0	0	0
WBGene00000437	88	66	101	96	77	79
WBGene00000438	139	182	148	65	52	38
WBGene00000439	35	30	42	6	10	10
WBGene00000440	0	3	1	1	0	1
WBGene00000441	400	437	442	251	207	208
WBGene00000442	46	43	37	52	48	42
WBGene00000443	778	862	756	318	259	256
WBGene00000444	458	363	278	128	116	93
WBGene00000445	2	5	2	2	1	3
WBGene00000446	6	13	4	2	2	0
WBGene00000447	4	2	4	4	4	5
WBGene00000448	109	133	112	40	33	35
WBGene00000449	5	2	5	13	2	2
WBGene00000450	0	2	0	1	3	0
WBGene00000451	41	41	46	39	27	21
WBGene00000452	49	48	48	20	9	12
WBGene00000453	48	62	60	51	25	28
WBGene00000454	3	3	3	3	0	1
WBGene00000455	21	23	15	18	9	10
WBGene00000457	0	1	1	4	6	1
WBGene00000458	98	115	110	133	114	104
WBGene00000459	4984	4629	3522	2170	1843	2056
WBGene00000460	637	472	360	147	109	127
WBGene00000461	128	158	107	52	56	53
WBGene00000462	400	382	386	194	142	144
WBGene00000463	118	123	115	43	35	28
WBGene00000464	3597	3587	3007	1782	1631	1673
WBGene00000465	35786	20977	12325	6822	5537	4736
WBGene00000466	2193	2332	1934	1096	985	1094
WBGene00000467	2530	2964	2623	1420	1374	1454
WBGene00000468	3	2	2	3	3	0
WBGene00000469	29	30	33	29	24	21
WBGene00000472	10614	9715	9512	5506	4840	4935
WBGene00000473	78180	87677	79174	40938	39638	37117
WBGene00000474	32008	36758	36043	19580	18374	16858
WBGene00000475	14301	13341	12087	7146	6650	6586
WBGene00000476	61	73	66	21	21	14
WBGene00000477	18	18	19	10	17	18
WBGene00000478	72	77	59	20	7	8
WBGene00000479	80379	66119	51469	27979	25034	25801
WBGene00000480	3540	2950	2335	1229	1043	1104
WBGene00000481	70	91	84	15	19	6
WBGene00000482	1442	1291	1074	494	407	396
WBGene00000483	0	0	1	2	0	0
WBGene00000484	14	23	16	2	5	9
WBGene00000485	108	118	80	33	18	28
WBGene00000487	3	6	4	1	1	1
WBGene00000488	59	54	41	9	11	11
WBGene00000490	46	55	45	10	9	6
WBGene00000491	90	92	81	23	10	13
WBGene00000492	30	32	28	7	16	12
WBGene00000493	145	129	107	17	11	16
WBGene00000496	16068	13190	9158	5656	4934	5381
WBGene00000497	209	158	101	71	58	60
WBGene00000498	2120	1865	1483	853	758	772
WBGene00000499	305	284	229	131	140	151
WBGene00000500	3309	3775	3627	1934	1879	1842
WBGene00000501	35	48	40	15	10	8
WBGene00000502	2691	3378	2953	1580	1610	1704
WBGene00000503	209	121	109	85	61	36
WBGene00000506	844	915	765	460	431	456
WBGene00000507	1463	1380	1116	516	597	608
WBGene00000508	1233	1103	898	504	517	519
WBGene00000509	2445	2864	2391	1562	1457	1405
WBGene00000510	84	109	100	57	39	38
WBGene00000511	116	127	115	125	91	105
WBGene00000512	514	638	532	292	315	322
WBGene00000513	1	3	4	1	1	1
WBGene00000514	252	226	217	190	138	135
WBGene00000515	971	1190	1090	789	755	761
WBGene00000516	133	154	160	93	69	55
WBGene00000517	1636	1417	1141	614	570	593
WBGene00000518	176	179	173	59	45	56
WBGene00000519	1996	1871	1571	943	811	950
WBGene00000520	2703	2963	2412	1332	1299	1352
WBGene00000521	0	1	2	0	0	2
WBGene00000522	437	552	591	1564	1468	1498
WBGene00000523	113	132	122	59	48	51
WBGene00000524	133	124	171	87	91	78
WBGene00000525	9	13	15	5	5	3
WBGene00000526	133	168	151	76	45	72
WBGene00000527	784	795	705	624	537	481
WBGene00000528	693	685	663	1237	999	927
WBGene00000529	68	83	67	25	20	19
WBGene00000530	774	718	446	286	260	273
WBGene00000531	26	29	18	13	8	15
WBGene00000532	3246	2973	2176	1249	1188	1320
WBGene00000533	1893	1949	1692	885	793	861
WBGene00000534	3314	3905	3937	3063	2549	2506
WBGene00000535	4593	5826	6347	3625	3104	3469
WBGene00000536	1057	1261	1305	775	727	647
WBGene00000537	1865	1887	1570	922	861	805
WBGene00000539	138	192	178	169	139	184
WBGene00000540	618	628	625	359	325	329
WBGene00000541	111	106	115	141	122	108
WBGene00000542	5027	4659	4104	2533	2040	2197
WBGene00000543	1901	1876	1473	856	794	783
WBGene00000544	18	16	13	13	7	12
WBGene00000545	835	785	727	475	394	362
WBGene00000546	14	16	18	12	10	6
WBGene00000547	2730	2369	2030	1187	949	994
WBGene00000548	3986	3355	2445	1288	1140	1161
WBGene00000549	2810	2334	1835	1037	930	925
WBGene00000550	12603	12000	10050	5469	5311	5473
WBGene00000551	0	0	0	0	1	0
WBGene00000552	8816	8084	7213	3932	3339	3460
WBGene00000553	173	201	204	51	31	44
WBGene00000554	1120	1126	1154	688	549	633
WBGene00000555	0	1	2	0	2	0
WBGene00000556	109	248	188	70	60	53
WBGene00000557	170	183	221	91	89	91
WBGene00000558	79	129	109	48	37	31
WBGene00000559	0	0	0	0	0	0
WBGene00000560	2	4	2	1	0	1
WBGene00000561	16	11	11	4	3	5
WBGene00000562	68	70	70	66	41	27
WBGene00000563	2	2	0	1	0	0
WBGene00000564	2200	1710	1273	707	629	651
WBGene00000565	1349	1139	1027	658	541	549
WBGene00000566	1905	1630	1355	939	776	778
WBGene00000567	7741	8289	6992	4277	3901	4032
WBGene00000583	44	40	47	29	24	18
WBGene00000584	61	60	65	26	22	24
WBGene00000585	3011	3319	2701	1516	1459	1603
WBGene00000591	737	489	364	250	153	163
WBGene00000592	1220	1234	1041	505	567	598
WBGene00000593	1	0	2	1	0	2
WBGene00000594	4702	5362	4891	685	349	906
WBGene00000596	13	0	15	50	28	11
WBGene00000597	11892	14550	15998	12533	11926	10446
WBGene00000599	3326	3379	3165	533	499	495
WBGene00000601	195	253	241	142	102	83
WBGene00000602	267	195	198	113	101	68
WBGene00000603	52	25	32	40	29	16
WBGene00000606	1224	1085	907	12	12	6
WBGene00000608	13178	15301	17967	20292	18398	15056
WBGene00000609	17615	21363	25651	24226	23626	19655
WBGene00000610	0	1	0	0	2	0
WBGene00000611	561	535	544	73	63	50
WBGene00000612	0	1	0	0	2	0
WBGene00000613	0	1	0	0	0	0
WBGene00000614	2	1	0	0	2	0
WBGene00000615	97	104	70	81	68	68
WBGene00000616	521	535	575	280	240	200
WBGene00000617	0	0	0	0	0	0
WBGene00000618	712	558	449	5	1	4
WBGene00000620	54	50	60	12	14	14
WBGene00000621	0	0	1	0	0	1
WBGene00000622	6	4	6	4	3	6
WBGene00000623	61	84	55	0	0	3
WBGene00000624	9	8	11	0	0	0
WBGene00000625	50	43	42	35	27	24
WBGene00000626	0	0	0	11	13	6
WBGene00000627	0	0	0	0	0	0
WBGene00000628	0	1	0	0	0	0
WBGene00000629	0	1	2	1	0	3
WBGene00000630	24	31	23	7	8	5
WBGene00000631	48	29	26	5	2	0
WBGene00000633	0	0	1	1	0	2
WBGene00000634	12	13	7	3	1	2
WBGene00000636	11	14	15	13	14	7
WBGene00000637	10	9	7	0	3	1
WBGene00000638	0	15	9	67	42	33
WBGene00000639	1	0	0	29	29	9
WBGene00000640	18	29	16	20	11	5
WBGene00000641	179	122	127	3	5	1
WBGene00000644	28	48	23	18	16	15
WBGene00000645	3	2	5	10	2	1
WBGene00000646	1	4	1	4	1	2
WBGene00000647	37	32	29	29	27	19
WBGene00000648	0	0	0	0	0	0
WBGene00000649	360	272	287	40	45	34
WBGene00000650	5	2	6	55	9	5
WBGene00000651	7	11	10	1	1	1
WBGene00000652	360	343	378	315	262	273
WBGene00000653	60	30	24	40	32	18
WBGene00000654	1	0	0	2	0	0
WBGene00000655	22	8	7	6	6	7
WBGene00000656	12263	14035	15874	9071	10775	8830
WBGene00000657	52	56	169	851	823	526
WBGene00000658	12	7	14	1	2	2
WBGene00000659	6	9	5	0	1	6
WBGene00000660	2	1	0	4	2	1
WBGene00000661	5	3	9	5	4	4
WBGene00000662	4	1	0	0	0	0
WBGene00000663	0	0	1	4	10	4
WBGene00000664	8	12	10	4	8	7
WBGene00000665	446	412	348	18	16	4
WBGene00000666	62	55	49	14	12	15
WBGene00000667	228	156	223	297	379	335
WBGene00000668	7000	8223	10184	9458	11880	9390
WBGene00000669	2833	3331	3669	2445	2499	2102
WBGene00000670	21565	22444	27676	9648	9463	8086
WBGene00000671	269	288	390	233	252	221
WBGene00000672	26	21	26	23	14	18
WBGene00000673	4151	4862	5579	3769	3839	3468
WBGene00000674	93	56	79	26	24	14
WBGene00000675	33179	36510	40512	20663	20369	18966
WBGene00000677	3438	4318	4594	3192	3259	3095
WBGene00000678	27	20	18	18	21	12
WBGene00000679	5	8	7	0	0	3
WBGene00000680	13839	16002	19389	11744	10899	9387
WBGene00000681	955	962	885	174	160	163
WBGene00000682	0	1	0	0	1	0
WBGene00000683	22	20	31	11	15	6
WBGene00000684	6	3	7	7	7	4
WBGene00000685	119	105	104	18	19	13
WBGene00000687	58	41	52	54	28	28
WBGene00000688	0	0	0	1	0	0
WBGene00000689	17	14	8	5	2	2
WBGene00000690	56	75	79	70	64	47
WBGene00000691	3305	2782	2867	663	903	290
WBGene00000692	791	840	820	407	302	290
WBGene00000693	34550	39744	46661	33817	34747	28577
WBGene00000694	3	6	6	7	7	8
WBGene00000695	7	0	4	22	6	4
WBGene00000696	32016	33352	37003	22864	21606	17383
WBGene00000697	3	6	8	10	8	4
WBGene00000698	8310	9535	12055	14018	13822	10818
WBGene00000699	836	598	605	49	40	27
WBGene00000700	1	1	3	3	2	1
WBGene00000702	93	97	80	6	3	3
WBGene00000703	106	125	329	1615	1529	1090
WBGene00000704	123	112	96	16	11	11
WBGene00000705	288	265	247	9	4	5
WBGene00000706	8	7	2	4	8	6
WBGene00000707	7	12	8	54	34	32
WBGene00000708	1567	1506	1504	880	529	533
WBGene00000710	0	3	0	3	2	1
WBGene00000711	6	8	6	26	16	22
WBGene00000712	89	117	262	1134	1171	795
WBGene00000713	29729	33170	37764	26967	27833	22023
WBGene00000714	13	12	14	18	14	12
WBGene00000715	616	835	878	948	1061	849
WBGene00000716	21824	23867	25411	12428	13584	12131
WBGene00000717	2204	2115	2153	616	516	455
WBGene00000718	14	14	14	6	9	1
WBGene00000719	26	42	22	27	29	19
WBGene00000720	1599	1636	1695	433	372	348
WBGene00000722	449	442	360	29	26	33
WBGene00000723	27	22	32	13	6	12
WBGene00000724	1	0	0	2	1	3
WBGene00000725	1	1	0	0	0	0
WBGene00000726	313	333	308	68	59	58
WBGene00000727	81	95	82	11	23	14
WBGene00000728	681	781	767	882	819	756
WBGene00000729	17	26	19	4	0	2
WBGene00000730	35	29	30	9	5	3
WBGene00000731	362	375	387	50	82	93
WBGene00000732	187	214	301	304	362	269
WBGene00000733	9100	10130	11262	7682	8537	6790
WBGene00000734	71	70	50	16	15	14
WBGene00000735	39	21	16	21	14	6
WBGene00000736	0	0	1	1	0	0
WBGene00000737	1	0	1	0	0	1
WBGene00000738	0	1	0	42	6	1
WBGene00000739	4071	4568	4216	904	873	839
WBGene00000740	1735	1681	1614	148	157	128
WBGene00000741	345	326	323	33	21	35
WBGene00000742	194	188	167	16	5	15
WBGene00000743	141	209	160	5	8	2
WBGene00000745	275	233	196	13	5	5
WBGene00000746	94	86	82	3	4	5
WBGene00000747	7	14	12	3	0	2
WBGene00000748	1	0	1	21	25	13
WBGene00000749	193	172	133	23	16	24
WBGene00000750	3	4	1	0	1	1
WBGene00000751	17835	21441	21827	14976	15561	12668
WBGene00000752	2981	3430	3695	4925	4627	4033
WBGene00000753	122	81	66	15	15	15
WBGene00000754	26964	30455	33494	23084	21008	17303
WBGene00000755	0	3	4	1	3	1
WBGene00000756	0	0	1	0	0	0
WBGene00000757	16300	18256	19922	13535	12023	10568
WBGene00000759	29	16	21	8	5	2
WBGene00000760	9	7	6	4	2	0
WBGene00000761	1696	1700	1714	1357	1024	958
WBGene00000762	1006	1166	1104	716	612	596
WBGene00000763	640	627	645	378	339	284
WBGene00000764	543	708	715	411	354	341
WBGene00000765	2711	3538	3472	1851	1835	1700
WBGene00000766	921	1099	1062	561	523	516
WBGene00000767	2881	2874	2506	1627	1435	1397
WBGene00000768	231	208	245	162	148	136
WBGene00000770	1730	1381	1125	520	496	581
WBGene00000771	4	0	2	10	5	4
WBGene00000772	6386	6106	4491	2635	2421	2606
WBGene00000773	2861	3303	2893	1602	1524	1467
WBGene00000774	1333	1267	1092	527	538	503
WBGene00000775	154	199	175	137	98	86
WBGene00000776	37475	37518	39390	30701	29356	27676
WBGene00000777	10044	12054	10621	6515	6337	5931
WBGene00000778	100	122	108	53	54	48
WBGene00000779	3143	3705	4282	3626	3336	2919
WBGene00000780	320	337	380	251	265	228
WBGene00000781	3515	3434	2525	4088	2166	1843
WBGene00000782	0	1	0	1	2	0
WBGene00000783	794	889	919	2991	2365	2220
WBGene00000784	6135	6836	6473	3652	2218	1874
WBGene00000785	11284	10009	10709	8803	7279	4654
WBGene00000786	23420	26474	24446	19881	19682	19904
WBGene00000787	1250	1354	1295	923	797	797
WBGene00000788	9259	10873	10741	4589	5285	5497
WBGene00000789	1532	1666	1708	1867	1586	1715
WBGene00000792	165	133	139	119	77	83
WBGene00000793	968	817	849	412	330	337
WBGene00000794	3947	4067	3201	1759	1651	1697
WBGene00000795	543	657	602	346	319	331
WBGene00000796	4192	4089	3142	1805	1739	1911
WBGene00000797	536	594	541	298	304	269
WBGene00000798	897	1108	1061	510	524	536
WBGene00000799	111	134	108	260	300	267
WBGene00000800	6370	5752	4831	2937	2767	2701
WBGene00000802	26480	23664	20326	16718	14370	13554
WBGene00000803	687	530	342	211	199	203
WBGene00000804	2153	2309	2291	1082	974	934
WBGene00000812	2043	1824	1513	878	801	867
WBGene00000813	2897	3053	2682	1464	1385	1420
WBGene00000814	4815	5832	5330	2895	2815	2830
WBGene00000815	4167	4978	4342	2434	2297	2330
WBGene00000816	3063	2973	2471	1380	1314	1369
WBGene00000817	2815	3210	2734	1688	1507	1465
WBGene00000818	2470	2697	2260	1239	1162	1116
WBGene00000819	47	48	24	15	21	15
WBGene00000820	21	15	15	3	4	8
WBGene00000821	0	3	5	3	0	3
WBGene00000822	1850	2206	2132	1686	1594	1525
WBGene00000829	40605	49896	48464	31031	29970	35173
WBGene00000830	1765	1641	1629	1589	1087	1081
WBGene00000831	2266	2151	2285	2228	1638	1636
WBGene00000832	599	528	501	221	214	172
WBGene00000833	19645	18064	15498	9655	9275	8357
WBGene00000834	3260	2988	2381	1639	1496	1587
WBGene00000835	2139	2824	3196	2310	1887	1539
WBGene00000836	4508	3909	3197	1967	1626	1743
WBGene00000837	5688	4658	3472	2116	1941	2024
WBGene00000838	6349	4954	4020	2542	2096	2122
WBGene00000839	3164	3406	2840	1669	1509	1674
WBGene00000840	2397	2157	1815	1072	1031	1079
WBGene00000841	120	124	147	232	202	181
WBGene00000843	4295	4927	4543	2645	2333	2237
WBGene00000845	207	239	237	145	156	149
WBGene00000846	3090	3111	2613	1531	1452	1473
WBGene00000851	1	3	1	0	0	0
WBGene00000853	11	16	15	12	5	0
WBGene00000854	2088	2236	1991	1137	1076	1157
WBGene00000857	310	300	325	131	118	97
WBGene00000858	49	58	56	92	65	48
WBGene00000859	0	0	0	0	0	0
WBGene00000861	0	0	0	0	0	0
WBGene00000862	4	2	9	1	2	1
WBGene00000863	3164	3111	2486	1400	1216	1399
WBGene00000864	36	38	42	20	29	10
WBGene00000865	8889	7847	5963	2717	2558	2594
WBGene00000866	6761	7826	6529	3603	3494	3342
WBGene00000867	11338	11891	10617	5665	5337	5075
WBGene00000868	20274	17207	12796	6130	5305	5303
WBGene00000869	10572	11065	10608	6867	6274	6301
WBGene00000870	287	287	226	55	66	62
WBGene00000871	4266	3931	2967	1568	1511	1658
WBGene00000872	2485	2175	1898	938	935	980
WBGene00000874	3431	3134	2687	1546	1489	1600
WBGene00000875	5239	4093	2971	1446	1369	1313
WBGene00000876	3165	3157	2564	1554	1328	1459
WBGene00000877	4233	5421	5422	3089	3032	2911
WBGene00000878	45	57	49	43	51	31
WBGene00000879	9768	11442	11870	6577	6109	5347
WBGene00000880	2443	2808	2310	1317	1234	1205
WBGene00000881	7721	8566	8524	6036	5254	4958
WBGene00000882	530	523	548	260	239	189
WBGene00000883	62732	71665	72342	39583	36910	32389
WBGene00000884	667	666	554	279	241	252
WBGene00000885	1686	2177	2011	1109	1050	1049
WBGene00000886	1622	2159	2107	1029	1013	873
WBGene00000887	1307	1816	1615	788	779	687
WBGene00000888	1773	2280	2331	1144	982	994
WBGene00000889	2147	2434	2133	1206	1178	1094
WBGene00000890	2399	2755	2354	1394	1263	1293
WBGene00000891	2594	2515	2244	1250	1088	1085
WBGene00000892	1366	1348	1146	673	621	710
WBGene00000893	2	8	11	11	3	0
WBGene00000894	10354	8011	6064	3920	3168	3198
WBGene00000895	10	15	18	8	10	18
WBGene00000896	5080	6554	6789	3379	3283	3115
WBGene00000897	1021	780	673	440	313	288
WBGene00000898	3760	2845	2136	1327	937	909
WBGene00000899	914	839	761	483	405	432
WBGene00000900	1315	1130	892	513	404	417
WBGene00000901	1222	1098	969	366	380	328
WBGene00000902	73	66	72	7	10	4
WBGene00000903	27	15	10	9	5	6
WBGene00000904	285	305	266	211	188	172
WBGene00000905	27	29	23	24	15	14
WBGene00000906	39	32	27	9	8	12
WBGene00000907	4	6	5	5	2	4
WBGene00000908	739	711	669	452	381	347
WBGene00000910	624	556	599	290	289	284
WBGene00000911	5673	5088	3942	2380	2111	2286
WBGene00000912	4258	3661	3100	2375	1911	1975
WBGene00000913	19394	16512	12755	6807	5871	6248
WBGene00000914	648	544	385	192	155	152
WBGene00000915	136809	130677	107964	62776	61242	61175
WBGene00000917	1128	1167	1112	660	572	599
WBGene00000920	0	1	3	2	0	0
WBGene00000923	3066	3801	3719	2092	1879	1992
WBGene00000928	1125	1287	1105	72	44	17
WBGene00000929	700	733	785	416	360	347
WBGene00000930	0	7	3	7	4	3
WBGene00000931	7293	6244	5074	2372	2570	2623
WBGene00000932	3	2	1	0	2	3
WBGene00000933	2089	2501	2273	1305	1272	1377
WBGene00000934	4	11	10	3	5	2
WBGene00000935	9354	8059	6284	3377	3135	3293
WBGene00000936	133	164	153	98	84	76
WBGene00000937	1711	1916	1674	970	856	861
WBGene00000938	4045	3544	2839	1547	1300	1549
WBGene00000939	5174	4551	3451	1869	1648	1868
WBGene00000940	1396	1357	1124	619	563	621
WBGene00000941	1647	2219	2505	1411	1215	1014
WBGene00000942	1980	1979	1707	862	784	683
WBGene00000950	48	35	37	34	32	20
WBGene00000951	44	48	60	35	24	24
WBGene00000952	24	27	25	6	3	7
WBGene00000953	20	22	20	8	2	7
WBGene00000955	65	87	72	37	34	21
WBGene00000958	209	242	184	44	41	52
WBGene00000959	772	754	760	640	485	495
WBGene00000960	2	5	4	1	1	1
WBGene00000961	805	675	589	312	272	261
WBGene00000962	13191	10841	8120	5338	4615	4596
WBGene00000963	777	788	828	531	441	426
WBGene00000964	296	271	272	220	165	152
WBGene00000965	2444	2780	2578	1456	1285	1284
WBGene00000966	263	300	291	96	94	114
WBGene00000967	1592	1918	1934	1721	1639	1933
WBGene00000968	92	106	110	52	78	65
WBGene00000969	346	377	328	141	141	120
WBGene00000970	3443	3817	3737	2157	1964	1785
WBGene00000971	221	223	260	191	200	233
WBGene00000972	19	22	13	7	4	6
WBGene00000973	628	663	703	505	380	350
WBGene00000974	999	1220	1307	665	682	535
WBGene00000975	2656	3317	3005	1861	1740	1470
WBGene00000976	2519	1958	1892	1235	844	904
WBGene00000977	1537	1549	1698	1818	1482	1279
WBGene00000978	1	6	4	2	0	2
WBGene00000979	20	26	26	8	2	5
WBGene00000980	417	297	237	152	118	120
WBGene00000981	817	893	966	771	565	566
WBGene00000982	660	845	756	374	339	353
WBGene00000983	273	367	346	282	182	194
WBGene00000984	609	588	657	986	781	778
WBGene00000985	4539	5662	5244	3130	2910	2822
WBGene00000986	75	60	84	51	35	27
WBGene00000987	1812	1913	1720	981	955	953
WBGene00000988	15214	15005	18545	14600	11123	7717
WBGene00000989	343	810	713	4	17	10
WBGene00000990	412	441	432	228	182	179
WBGene00000991	3223	3576	3561	3803	3003	2910
WBGene00000992	254	284	296	141	97	76
WBGene00000993	895	907	870	635	542	512
WBGene00000994	1867	1900	1530	834	827	881
WBGene00000995	1427	966	654	373	298	274
WBGene00000996	3512	3780	3514	2107	2002	1916
WBGene00000998	1049	1064	771	297	202	211
WBGene00001000	2844	3066	3080	2403	2476	2013
WBGene00001001	3829	3983	3343	1886	1846	2050
WBGene00001002	2864	2700	2258	1264	1083	1110
WBGene00001005	12913	16180	16451	8249	7836	7542
WBGene00001006	1776	1673	1399	820	690	648
WBGene00001007	2625	2500	1991	1225	1139	1039
WBGene00001008	1287	1338	1253	1048	782	754
WBGene00001016	2521	1961	1375	799	691	684
WBGene00001017	4579	4273	3272	2342	1905	2093
WBGene00001018	3159	3826	3414	1898	1795	1730
WBGene00001019	3051	3224	2854	1802	1648	1573
WBGene00001020	2332	2812	2725	1351	1353	1345
WBGene00001021	423	523	576	287	276	305
WBGene00001022	844	934	954	516	480	474
WBGene00001023	12434	10096	7432	3958	3494	3519
WBGene00001025	1277	1252	1125	1017	895	980
WBGene00001026	3067	3099	2339	1289	1117	1361
WBGene00001027	1866	1845	1554	981	782	910
WBGene00001028	2317	2497	2244	1406	1312	1188
WBGene00001029	8584	9459	7779	4287	3989	4498
WBGene00001030	11339	11756	10535	6174	5661	5940
WBGene00001031	6190	5942	4928	2741	2505	2584
WBGene00001032	930	777	789	467	413	439
WBGene00001033	1078	1335	1378	679	674	630
WBGene00001034	2527	2729	2553	1759	1647	1681
WBGene00001035	2230	2433	2155	1259	1103	1167
WBGene00001036	1052	1316	1292	642	616	635
WBGene00001037	10241	10971	8993	5143	4880	5389
WBGene00001038	5842	5867	5854	5343	4627	4898
WBGene00001039	625	868	947	523	484	500
WBGene00001040	3008	3869	3494	1893	1780	1766
WBGene00001041	2933	3551	3114	1700	1597	1799
WBGene00001042	263	257	307	192	164	185
WBGene00001043	2584	2308	1943	1201	1086	1059
WBGene00001044	1005	1311	1170	571	578	597
WBGene00001045	604	511	459	232	203	186
WBGene00001046	1307	1279	1025	632	502	510
WBGene00001047	5495	4808	4126	2566	2113	2256
WBGene00001048	1888	2386	2222	1183	1146	1142
WBGene00001049	1823	1570	1297	758	641	635
WBGene00001050	984	1205	1187	570	580	596
WBGene00001051	6337	7685	7477	3445	3181	3228
WBGene00001052	69	84	64	29	14	15
WBGene00001053	29	35	30	9	15	9
WBGene00001054	106	108	126	77	49	63
WBGene00001055	1672	1840	1834	1689	1314	1272
WBGene00001056	7456	7055	5410	3410	3048	3186
WBGene00001057	2990	3094	2766	1732	1591	1647
WBGene00001058	7622	6396	5312	3575	2917	3044
WBGene00001059	279	363	342	38	36	24
WBGene00001060	2109	2215	1695	941	805	857
WBGene00001061	3693	3593	2661	1427	1275	1339
WBGene00001062	2	1	7	0	1	1
WBGene00001063	85	57	53	5	5	2
WBGene00001064	642	655	501	33	13	9
WBGene00001065	339	383	284	5	1	1
WBGene00001066	692	568	491	20	28	9
WBGene00001067	750	681	604	40	19	11
WBGene00001068	525	608	467	35	46	49
WBGene00001069	478	540	470	26	6	11
WBGene00001070	681	654	512	13	17	18
WBGene00001071	437	400	386	11	11	5
WBGene00001072	730	792	644	73	51	37
WBGene00001073	4194	4275	3852	2175	1947	1984
WBGene00001074	774	664	695	26	17	21
WBGene00001075	41	21	22	194	43	27
WBGene00001076	152	127	123	192	67	47
WBGene00001077	851	811	722	277	196	207
WBGene00001078	307	338	294	174	136	131
WBGene00001079	88	89	58	2	3	1
WBGene00001080	1413	1179	848	441	313	364
WBGene00001081	2048	1772	1326	796	631	633
WBGene00001082	1448	1308	1096	616	552	527
WBGene00001085	3789	3555	2757	1650	1379	1517
WBGene00001086	1589	1462	1084	568	454	449
WBGene00001087	2977	2551	1955	901	835	807
WBGene00001088	3330	4038	3701	1681	1711	1630
WBGene00001089	1378	1304	1135	737	632	655
WBGene00001090	2046	1975	1482	954	842	921
WBGene00001092	2131	2690	2489	1339	1335	1374
WBGene00001093	5886	5580	4520	2796	2393	2400
WBGene00001094	10390	11118	9889	6076	5744	5689
WBGene00001095	1432	1555	1462	837	802	830
WBGene00001096	8	13	10	5	2	5
WBGene00001099	1454	1415	1320	1810	1578	1543
WBGene00001101	848	826	701	444	360	391
WBGene00001102	3181	2896	2199	1349	1181	1231
WBGene00001103	6	5	7	9	3	2
WBGene00001104	93	120	101	56	37	32
WBGene00001105	13	5	5	14	7	1
WBGene00001106	0	0	0	0	0	0
WBGene00001107	4	5	2	2	0	0
WBGene00001108	3	5	4	8	6	1
WBGene00001109	6	5	3	5	3	4
WBGene00001110	1876	1669	1385	799	765	795
WBGene00001112	3549	3670	3194	1731	1537	1738
WBGene00001113	324	303	297	152	97	95
WBGene00001115	221	205	167	107	71	97
WBGene00001116	299	310	268	77	92	82
WBGene00001117	44	35	34	11	8	13
WBGene00001118	80	81	83	46	19	29
WBGene00001119	102	113	86	88	55	76
WBGene00001121	23	25	31	10	14	9
WBGene00001122	59	101	91	24	12	15
WBGene00001123	49	76	65	36	26	21
WBGene00001127	33	39	43	17	8	6
WBGene00001129	14	19	14	4	4	5
WBGene00001130	2729	1938	1457	849	789	752
WBGene00001131	1428	1204	957	516	438	422
WBGene00001132	1069	1129	1220	1498	1326	1326
WBGene00001133	0	0	2	2	2	0
WBGene00001134	4337	4201	3423	2199	1946	2115
WBGene00001135	185	235	196	25	28	28
WBGene00001136	3	13	11	4	8	6
WBGene00001137	25014	20646	16364	11107	9898	8948
WBGene00001145	671	682	607	328	305	272
WBGene00001147	7	0	0	0	0	1
WBGene00001148	596	439	314	175	107	108
WBGene00001149	3996	3969	3963	3806	3259	3182
WBGene00001150	27	18	23	8	9	10
WBGene00001151	1347	1636	1565	898	859	777
WBGene00001152	353	452	469	349	304	286
WBGene00001153	2814	2838	2438	1487	1472	1471
WBGene00001154	2145	2351	2203	1464	1379	1366
WBGene00001155	14935	16476	17390	14206	12201	11429
WBGene00001156	4270	4562	5343	5569	4126	3361
WBGene00001157	420	518	483	378	284	292
WBGene00001158	23	13	21	236	108	120
WBGene00001159	144	171	141	64	35	35
WBGene00001160	3376	3323	2700	1513	1335	1402
WBGene00001161	1960	2076	1567	808	737	795
WBGene00001162	792	690	521	268	277	279
WBGene00001163	248	258	248	104	83	65
WBGene00001164	96	113	134	78	69	70
WBGene00001165	279	252	233	163	138	105
WBGene00001166	6390	6424	5170	3062	2732	2854
WBGene00001167	142803	131789	114145	69961	66156	63707
WBGene00001168	253259	223652	178597	92028	93014	86516
WBGene00001169	10869	11148	10045	5707	5498	4862
WBGene00001170	80	60	51	23	20	23
WBGene00001171	164	155	142	37	25	35
WBGene00001172	1815	1845	1740	439	430	422
WBGene00001173	8748	7423	6393	3293	2984	3130
WBGene00001174	197	231	189	45	18	29
WBGene00001175	172	173	163	84	73	78
WBGene00001177	2562	2481	2340	1540	1243	1207
WBGene00001178	905	857	802	416	349	341
WBGene00001179	513	570	487	284	218	245
WBGene00001182	271	287	276	260	182	188
WBGene00001184	419	460	398	193	152	134
WBGene00001185	6	6	10	8	5	8
WBGene00001186	952	731	590	243	194	204
WBGene00001187	522	512	412	169	181	183
WBGene00001188	1139	1285	1098	215	190	178
WBGene00001189	1718	1802	1731	743	645	627
WBGene00001190	159	167	117	52	56	47
WBGene00001193	533	490	467	212	213	211
WBGene00001194	5637	5267	4096	2648	2088	2223
WBGene00001196	2255	2013	1702	951	759	794
WBGene00001202	45	76	58	52	45	39
WBGene00001204	85	98	93	34	14	16
WBGene00001207	223	218	212	158	139	144
WBGene00001208	1003	1046	1084	965	885	873
WBGene00001209	11225	10060	8551	4292	4266	4095
WBGene00001210	69	51	56	12	10	7
WBGene00001211	32	27	33	9	6	11
WBGene00001214	4133	3854	3065	1839	1612	1893
WBGene00001215	2743	2173	1696	886	821	801
WBGene00001224	2415	2073	1546	871	724	836
WBGene00001225	7592	6838	5559	2473	2487	2426
WBGene00001226	13313	13780	11825	6321	6262	6819
WBGene00001227	8045	8546	7561	4204	4360	4334
WBGene00001228	6677	7500	6609	3642	3569	3592
WBGene00001229	6941	7912	7603	4271	4351	4257
WBGene00001230	3903	4083	3787	2090	1934	1978
WBGene00001231	5525	6354	5533	3043	3010	2982
WBGene00001232	4692	4738	4136	2226	2102	1967
WBGene00001233	4145	4866	4561	2652	2482	2285
WBGene00001234	2538	2778	2429	1094	1245	1089
WBGene00001235	1136	1360	1278	596	630	567
WBGene00001236	1009	1014	974	507	418	450
WBGene00001237	0	0	1	0	0	0
WBGene00001239	9676	11073	10342	7427	7063	6872
WBGene00001240	7039	7876	8141	9303	8249	7412
WBGene00001241	3317	3328	3000	2371	2057	2168
WBGene00001242	98	125	93	28	28	27
WBGene00001243	8450	10934	11117	11805	10947	10327
WBGene00001244	10825	12637	12809	14978	14222	14051
WBGene00001245	0	0	2	1	3	0
WBGene00001246	5	7	10	1	2	3
WBGene00001247	421	492	533	394	372	310
WBGene00001248	246	242	212	195	191	218
WBGene00001249	340	310	280	138	121	134
WBGene00001250	372	382	352	456	335	342
WBGene00001251	361	434	420	268	167	200
WBGene00001252	13	5	9	23	12	12
WBGene00001253	109	120	97	27	21	20
WBGene00001258	5475	4695	3511	1729	1681	1755
WBGene00001259	11387	10766	8580	4883	4512	4803
WBGene00001262	6638	6494	5598	3982	3475	3207
WBGene00001263	4343	4147	3766	2144	1822	1699
WBGene00001281	2896	3098	2294	1280	1233	1313
WBGene00001284	3581	3602	2866	1817	1626	1779
WBGene00001303	7496	10088	10187	6218	5918	5438
WBGene00001309	2153	2430	2220	1017	996	958
WBGene00001310	2	2	1	2	2	1
WBGene00001311	19	27	30	11	6	13
WBGene00001320	4506	4370	3646	2050	2009	1930
WBGene00001324	2553	2511	2103	1216	1066	1121
WBGene00001325	779	709	546	318	266	258
WBGene00001328	1782	1832	1477	877	772	691
WBGene00001329	3589	2755	2244	1134	1096	989
WBGene00001330	1768	1645	1556	1429	1236	1102
WBGene00001331	1787	1899	1899	1344	1186	1153
WBGene00001332	2173	2307	2092	1127	1075	1066
WBGene00001333	10994	10492	9408	8202	7300	7130
WBGene00001334	2229	2286	1927	1354	1089	1239
WBGene00001335	522	535	447	244	218	219
WBGene00001336	5908	5682	4791	2477	2460	2516
WBGene00001337	9272	8454	6785	3982	3743	4121
WBGene00001338	985	1079	975	606	576	601
WBGene00001340	2793	2440	2032	1238	985	1047
WBGene00001345	765	769	766	594	499	479
WBGene00001352	4606	4515	3420	1891	1685	1916
WBGene00001358	823	1102	1075	547	516	486
WBGene00001365	926	989	822	445	393	429
WBGene00001366	471	477	469	396	311	261
WBGene00001368	273	313	291	158	107	123
WBGene00001371	842	960	941	616	570	483
WBGene00001372	2593	2731	2362	1388	1402	1400
WBGene00001373	62	69	67	18	16	8
WBGene00001374	98	111	88	19	20	16
WBGene00001377	26	25	31	11	5	14
WBGene00001385	17201	19141	19604	12351	11241	9777
WBGene00001386	63294	70940	75015	54678	48064	40269
WBGene00001387	155	176	187	146	147	134
WBGene00001388	12	10	16	8	6	5
WBGene00001389	186	226	259	124	124	114
WBGene00001390	1542	1642	1823	1338	1157	1205
WBGene00001391	80	117	81	48	27	24
WBGene00001392	230	270	271	143	107	74
WBGene00001393	14451	15736	14766	7838	7218	6698
WBGene00001394	19106	20453	20909	18509	15164	14137
WBGene00001395	2948	3710	3760	2777	2322	2307
WBGene00001396	9637	10868	10531	8919	7400	7225
WBGene00001397	298	318	349	40	34	27
WBGene00001398	10100	11897	11708	9047	6972	7308
WBGene00001399	126	135	115	7	12	15
WBGene00001400	5	5	7	3	3	2
WBGene00001401	670	644	658	371	373	460
WBGene00001402	693	644	641	391	378	398
WBGene00001403	823	898	965	793	720	635
WBGene00001404	4821	5021	4852	2993	2723	2495
WBGene00001405	3953	4364	4017	2392	2296	2301
WBGene00001406	926	980	908	448	435	463
WBGene00001410	53	68	63	16	16	23
WBGene00001411	2277	2227	1944	1179	1068	1162
WBGene00001412	3355	3183	2503	1325	1170	1241
WBGene00001413	2369	2760	2498	1274	1174	1379
WBGene00001414	27	25	22	17	12	13
WBGene00001423	16340	15847	15015	7976	8025	8374
WBGene00001424	21	16	17	12	13	11
WBGene00001425	589	676	661	493	406	354
WBGene00001426	3839	4775	4840	2917	2694	2495
WBGene00001427	13629	15818	16877	8719	8037	7398
WBGene00001428	451	524	531	257	252	257
WBGene00001429	59	39	32	14	9	11
WBGene00001430	769	941	710	306	305	241
WBGene00001431	10898	10747	9222	4962	4872	4745
WBGene00001432	41	53	51	29	23	24
WBGene00001433	161	160	166	114	86	106
WBGene00001434	1	0	2	3	0	3
WBGene00001435	338	344	249	107	100	89
WBGene00001436	189	206	140	84	61	45
WBGene00001437	11	8	11	2	4	4
WBGene00001438	50	48	40	27	28	23
WBGene00001439	642	521	448	177	134	147
WBGene00001440	18	15	19	8	4	11
WBGene00001441	995	965	830	850	558	562
WBGene00001442	4	11	6	1	1	3
WBGene00001443	3412	3064	2337	1514	1347	1421
WBGene00001444	56	71	89	22	21	8
WBGene00001445	61	54	58	29	22	25
WBGene00001446	22	32	27	29	14	17
WBGene00001447	209	228	266	46	46	48
WBGene00001448	267	293	285	87	62	66
WBGene00001449	1134	1340	1524	673	745	816
WBGene00001450	239	283	259	54	57	49
WBGene00001451	41	66	71	29	20	20
WBGene00001452	261	283	282	123	83	72
WBGene00001453	292	299	269	220	167	178
WBGene00001454	92	120	134	33	32	26
WBGene00001455	125	144	178	127	87	81
WBGene00001456	16	22	12	15	19	10
WBGene00001457	190	243	237	103	71	72
WBGene00001458	402	473	496	119	90	89
WBGene00001459	438	522	557	105	100	100
WBGene00001460	81	102	126	78	51	52
WBGene00001461	99	114	120	77	48	60
WBGene00001462	31	37	37	26	23	31
WBGene00001463	185	225	184	58	47	46
WBGene00001464	80	84	80	14	10	10
WBGene00001465	201	143	193	197	190	175
WBGene00001466	15	31	20	41	23	28
WBGene00001468	62	66	59	92	55	67
WBGene00001470	1466	1286	1021	529	453	421
WBGene00001475	551	545	510	112	78	84
WBGene00001476	556	628	626	509	471	528
WBGene00001477	26	38	15	11	4	3
WBGene00001478	110	162	139	126	136	105
WBGene00001479	797	890	904	549	509	473
WBGene00001480	428	524	460	234	215	206
WBGene00001481	595	561	462	291	276	247
WBGene00001482	1333	1552	1427	765	747	680
WBGene00001483	15	9	16	13	0	8
WBGene00001484	441	337	330	135	112	90
WBGene00001485	1548	1378	1142	665	583	583
WBGene00001486	618	827	884	463	429	414
WBGene00001487	2	5	8	8	7	1
WBGene00001488	6158	5734	4449	2695	2220	2160
WBGene00001489	746	702	739	586	454	472
WBGene00001490	237	220	191	62	56	75
WBGene00001491	3458	3503	2854	1665	1424	1442
WBGene00001492	1098	964	822	467	437	379
WBGene00001493	3223	2717	2475	1819	1466	1431
WBGene00001494	174	146	155	93	71	86
WBGene00001495	95	106	96	59	53	54
WBGene00001496	3849	4170	3695	2781	2734	2689
WBGene00001497	6480	6785	5843	3412	3338	3339
WBGene00001498	5979	6842	6070	3235	3298	3461
WBGene00001499	3167	3425	2734	1542	1368	1539
WBGene00001500	139	123	183	181	93	62
WBGene00001501	6273	7052	7542	11715	9505	8686
WBGene00001502	7946	7403	7377	4775	4069	3683
WBGene00001503	5920	4903	4126	2772	2395	2071
WBGene00001505	320	363	352	424	320	345
WBGene00001506	6	12	6	31	23	13
WBGene00001507	18	22	38	21	14	10
WBGene00001508	300	336	322	327	271	261
WBGene00001509	3072	3195	2715	1548	1510	1465
WBGene00001510	2290	1731	1346	848	747	734
WBGene00001511	6411	6631	5304	2961	2814	2751
WBGene00001512	89	122	97	34	15	16
WBGene00001513	3526	3436	2718	1526	1336	1450
WBGene00001514	4394	3613	2622	1676	1449	1432
WBGene00001515	160	170	129	56	46	46
WBGene00001516	1567	1339	1203	623	548	535
WBGene00001517	24	31	22	13	9	16
WBGene00001518	106	110	119	49	37	43
WBGene00001519	60	99	74	53	42	26
WBGene00001520	2731	2721	2726	2182	1932	1576
WBGene00001522	385	380	412	298	213	231
WBGene00001523	437	517	618	308	260	294
WBGene00001526	2669	2329	1937	1472	1330	1490
WBGene00001527	3592	3489	3082	1965	1726	1815
WBGene00001528	0	0	1	0	0	0
WBGene00001529	0	0	0	0	0	0
WBGene00001530	0	0	1	0	0	0
WBGene00001531	18	16	8	4	4	3
WBGene00001532	0	0	4	0	1	0
WBGene00001533	2	2	2	2	0	0
WBGene00001534	2	1	2	0	0	1
WBGene00001535	7	16	7	5	3	6
WBGene00001536	7	14	16	10	4	7
WBGene00001537	27	22	17	27	17	20
WBGene00001538	912	932	779	678	564	604
WBGene00001539	1	1	2	0	0	0
WBGene00001540	2	0	1	0	0	1
WBGene00001541	3	1	0	1	1	0
WBGene00001542	2	1	0	0	1	0
WBGene00001543	21	26	19	14	6	14
WBGene00001544	17	11	16	1	8	5
WBGene00001545	0	0	0	0	0	1
WBGene00001546	2	0	1	1	0	3
WBGene00001547	10	13	11	19	15	14
WBGene00001548	16	8	10	4	4	3
WBGene00001549	34	22	28	0	0	1
WBGene00001550	4	0	2	1	0	0
WBGene00001551	18	6	9	19	20	16
WBGene00001552	84	87	61	1	0	1
WBGene00001553	24	18	19	3	5	4
WBGene00001554	30	30	14	0	3	2
WBGene00001555	133	158	117	25	26	18
WBGene00001556	83	125	105	7	1	7
WBGene00001557	101	118	68	5	3	7
WBGene00001558	14575	13710	11876	7260	6534	6157
WBGene00001559	634	643	551	497	402	405
WBGene00001560	1191	1112	1020	1006	849	808
WBGene00001561	3287	2693	2388	1059	848	898
WBGene00001562	2970	2051	1598	894	749	711
WBGene00001563	3021	2357	1798	1031	832	962
WBGene00001564	5374	4806	4636	2231	1852	1238
WBGene00001565	1768	1312	1043	617	467	419
WBGene00001566	1963	2175	1816	1086	1132	1122
WBGene00001568	3361	3138	2526	1492	1323	1412
WBGene00001569	2936	2109	1414	896	670	678
WBGene00001570	482	481	427	120	93	75
WBGene00001571	2502	2566	1940	1032	928	1028
WBGene00001572	386	408	405	208	183	164
WBGene00001574	5046	5069	4288	2504	2243	2291
WBGene00001575	3	7	9	4	5	3
WBGene00001577	267	270	267	308	292	274
WBGene00001578	828	761	800	923	696	676
WBGene00001579	2175	1709	1378	864	724	722
WBGene00001580	3352	3282	2669	1625	1498	1587
WBGene00001581	18193	15739	13976	18749	14147	12510
WBGene00001582	4904	4657	3887	2231	2027	2121
WBGene00001583	698	516	388	201	154	186
WBGene00001584	4473	4553	3902	2208	2097	2184
WBGene00001585	1367	1849	1767	886	781	847
WBGene00001586	30	34	25	2	7	2
WBGene00001587	6	8	7	3	5	5
WBGene00001588	47	40	46	20	9	15
WBGene00001589	2230	2026	1670	988	899	848
WBGene00001590	824	948	902	445	438	450
WBGene00001591	383	409	410	432	392	381
WBGene00001592	104	105	113	90	71	79
WBGene00001593	12	10	9	5	0	1
WBGene00001594	83	94	89	47	24	32
WBGene00001595	30857	24966	20074	11132	10089	10268
WBGene00001596	8137	6548	5245	2858	2573	2613
WBGene00001597	11836	10397	7905	4286	3816	4162
WBGene00001598	11846	10816	9551	6065	5910	6203
WBGene00001599	7364	5807	4413	2940	2404	2459
WBGene00001600	2075	1840	1539	860	803	899
WBGene00001601	4912	3758	2921	1803	1594	1638
WBGene00001602	462	509	506	380	311	311
WBGene00001603	0	2	5	20	14	7
WBGene00001604	3858	3847	4262	1340	1368	1201
WBGene00001606	9903	9153	7354	4531	3814	3577
WBGene00001607	19664	17614	13545	7903	6768	6640
WBGene00001608	0	0	1	1	0	1
WBGene00001609	5967	5386	4011	2238	2069	2185
WBGene00001612	27	41	20	6	5	8
WBGene00001613	34	43	50	17	8	15
WBGene00001614	3	3	2	6	2	0
WBGene00001615	67	80	97	40	25	40
WBGene00001616	48	55	59	19	16	21
WBGene00001617	196	218	187	114	105	93
WBGene00001618	7	6	3	4	9	3
WBGene00001619	11	14	13	11	5	2
WBGene00001620	1518	1619	1716	1205	1106	1061
WBGene00001621	45	51	35	32	21	30
WBGene00001622	239	239	179	111	86	109
WBGene00001623	60	83	68	107	60	55
WBGene00001624	21	16	16	26	15	8
WBGene00001625	7	5	7	9	4	1
WBGene00001626	0	3	3	0	1	0
WBGene00001627	320	363	324	219	197	220
WBGene00001628	3399	3299	2795	1488	1480	1515
WBGene00001629	1282	1175	1089	865	742	794
WBGene00001630	2686	2517	2287	1686	1427	1546
WBGene00001631	783	843	783	395	346	303
WBGene00001632	3558	3200	2708	1522	1392	1450
WBGene00001633	395	459	467	207	207	208
WBGene00001635	2856	2791	2343	1427	1286	1277
WBGene00001636	164	198	147	72	75	66
WBGene00001637	280	272	319	120	145	126
WBGene00001638	1060	995	1013	802	749	734
WBGene00001639	94	94	91	49	39	41
WBGene00001640	0	0	1	0	1	0
WBGene00001643	10	16	14	8	2	5
WBGene00001644	186	219	199	190	159	200
WBGene00001645	4584	4909	4407	2323	2104	2201
WBGene00001646	102	98	110	77	54	46
WBGene00001647	6456	7712	6763	3511	3592	3336
WBGene00001648	5987	5135	4169	2311	1950	2093
WBGene00001649	1281	1309	1247	923	806	736
WBGene00001650	716	649	607	491	465	378
WBGene00001651	1801	1599	1424	1138	1082	958
WBGene00001653	3219	3015	2269	1276	1179	1325
WBGene00001660	1214	1216	1131	660	602	612
WBGene00001661	2569	3357	3037	1659	1606	1681
WBGene00001662	2746	2925	2652	1818	1599	1609
WBGene00001663	39	40	48	33	20	25
WBGene00001664	52	50	54	12	7	12
WBGene00001665	67	88	65	23	23	19
WBGene00001666	136	138	105	40	43	43
WBGene00001667	0	0	0	0	0	0
WBGene00001668	18	27	19	4	1	8
WBGene00001669	155	194	179	71	63	54
WBGene00001670	5	10	12	6	2	6
WBGene00001671	39	30	48	35	27	28
WBGene00001672	20	26	28	22	21	18
WBGene00001673	19	24	25	4	3	3
WBGene00001674	112	126	132	74	66	84
WBGene00001675	41	53	39	50	45	57
WBGene00001676	40	33	32	11	12	8
WBGene00001677	21	32	23	13	7	7
WBGene00001678	1662	1565	1231	625	584	617
WBGene00001679	6041	4755	3954	1745	1621	1595
WBGene00001680	349	410	397	247	246	220
WBGene00001681	52	71	70	26	21	20
WBGene00001682	1492	1975	2111	1118	1012	963
WBGene00001683	10388	9757	7593	3921	3634	3225
WBGene00001684	7741	7344	8634	915	507	454
WBGene00001685	9237	8873	9844	10537	8532	5977
WBGene00001686	5971	5626	4475	2301	2159	2067
WBGene00001687	23	17	24	17	18	12
WBGene00001688	739	753	670	326	365	350
WBGene00001689	1096	1099	929	552	461	472
WBGene00001690	121	111	85	7	11	8
WBGene00001691	57	51	28	3	0	1
WBGene00001692	1310	1455	1649	1284	1259	1089
WBGene00001693	48	67	94	24	40	34
WBGene00001694	940	1171	1269	994	990	973
WBGene00001695	23	18	13	2	1	3
WBGene00001696	0	0	0	0	1	0
WBGene00001698	0	4	3	4	0	0
WBGene00001699	317	376	385	118	113	126
WBGene00001700	10	12	4	0	0	1
WBGene00001701	3	0	6	1	0	0
WBGene00001702	332	406	403	101	98	88
WBGene00001703	145	169	177	64	89	98
WBGene00001704	5	5	1	0	2	0
WBGene00001705	3	2	1	3	1	5
WBGene00001707	262	232	205	53	39	32
WBGene00001708	1154	971	719	409	309	299
WBGene00001709	362	341	226	146	106	117
WBGene00001710	55	35	41	2	2	1
WBGene00001711	25	15	12	2	1	0
WBGene00001712	2	10	9	7	5	2
WBGene00001713	311	320	321	185	174	140
WBGene00001714	75	80	43	2	1	1
WBGene00001715	2	3	0	1	1	2
WBGene00001716	313	242	202	16	7	4
WBGene00001717	12	19	19	5	4	11
WBGene00001718	4	0	1	1	1	1
WBGene00001719	103	116	107	44	20	19
WBGene00001720	0	1	2	2	0	2
WBGene00001721	17	15	23	3	1	3
WBGene00001722	0	1	1	1	3	0
WBGene00001723	15	17	9	26	19	15
WBGene00001724	141	147	124	37	19	24
WBGene00001725	705	552	467	18	19	6
WBGene00001726	17	12	14	2	8	4
WBGene00001727	9	7	10	12	9	7
WBGene00001728	0	1	0	0	0	0
WBGene00001729	2	1	2	1	1	2
WBGene00001730	19	9	15	19	6	6
WBGene00001731	17	15	17	15	16	12
WBGene00001732	1	0	2	0	3	0
WBGene00001733	1	0	0	0	0	0
WBGene00001734	0	1	1	0	0	0
WBGene00001735	10	9	7	2	3	0
WBGene00001736	3	2	6	1	1	0
WBGene00001737	1	2	3	0	0	0
WBGene00001739	1	0	0	0	0	0
WBGene00001740	926	1169	1070	593	619	630
WBGene00001743	3153	3716	3336	1713	1699	1801
WBGene00001744	7632	7732	6393	3166	3421	3398
WBGene00001745	272	232	153	134	88	110
WBGene00001746	2440	2013	1533	897	729	733
WBGene00001747	7285	6465	5241	3178	2752	2999
WBGene00001748	12609	13556	12082	6925	6469	6605
WBGene00001749	8327	10229	10015	5688	5669	4365
WBGene00001750	1	3	7	6	1	5
WBGene00001751	19	20	20	12	7	12
WBGene00001752	180	252	214	83	114	107
WBGene00001753	413	484	548	427	442	460
WBGene00001754	399	458	497	763	545	449
WBGene00001755	6847	7636	7670	4012	3729	2933
WBGene00001756	6	3	5	5	2	4
WBGene00001757	66	70	70	47	52	35
WBGene00001758	468	603	597	210	287	263
WBGene00001759	41	50	36	14	13	14
WBGene00001760	56	44	55	36	21	26
WBGene00001761	688	800	896	1077	1025	947
WBGene00001762	0	4	11	4	6	1
WBGene00001763	30	36	34	26	26	36
WBGene00001764	82	98	103	69	54	58
WBGene00001765	2	1	0	1	3	0
WBGene00001766	3	0	0	3	1	0
WBGene00001767	10	7	2	3	3	0
WBGene00001768	279	316	323	215	208	224
WBGene00001769	4	15	12	7	3	7
WBGene00001770	282	286	301	846	776	754
WBGene00001771	6	7	5	2	0	1
WBGene00001772	77	92	73	47	51	53
WBGene00001773	1	2	3	0	0	3
WBGene00001774	752	875	1026	1112	902	860
WBGene00001775	1160	1375	1327	1444	1232	1218
WBGene00001776	207	228	285	345	294	278
WBGene00001777	58	50	64	23	20	19
WBGene00001778	26	36	32	23	18	16
WBGene00001779	6	4	6	1	3	5
WBGene00001780	27	13	23	10	8	6
WBGene00001781	20	26	17	8	17	12
WBGene00001782	1	2	1	1	0	1
WBGene00001783	31	28	23	10	17	8
WBGene00001784	690	775	886	983	901	804
WBGene00001785	1	0	1	0	0	1
WBGene00001786	83	88	91	232	193	193
WBGene00001787	185	236	230	273	246	211
WBGene00001788	28	21	32	6	10	3
WBGene00001789	8	9	8	4	2	1
WBGene00001790	560	630	614	540	512	488
WBGene00001791	207	266	291	163	187	190
WBGene00001792	72	90	71	29	32	37
WBGene00001793	7659	6327	4999	2632	2337	2366
WBGene00001794	6369	7082	7317	6267	5579	5253
WBGene00001795	1649	1668	1685	2080	1652	1659
WBGene00001796	94	86	89	85	61	58
WBGene00001803	63	51	75	24	23	18
WBGene00001804	0	0	1	1	2	0
WBGene00001805	34	27	23	21	20	11
WBGene00001806	10	15	14	7	7	6
WBGene00001808	1477	1946	2003	934	863	771
WBGene00001811	249	239	221	134	136	140
WBGene00001812	3187	3320	2629	1648	1598	1668
WBGene00001813	2674	2676	2219	1477	1233	1222
WBGene00001814	1117	1034	1122	1018	794	738
WBGene00001815	1867	1616	1389	799	645	774
WBGene00001816	1009	1018	998	605	577	578
WBGene00001817	494	443	395	285	311	245
WBGene00001819	1132	1229	1295	1217	1063	968
WBGene00001820	200	179	142	33	16	15
WBGene00001821	167	243	189	105	70	82
WBGene00001823	919	1151	1209	590	536	557
WBGene00001824	386	327	269	116	104	86
WBGene00001827	6995	6980	5555	3172	2959	3139
WBGene00001828	10	1	2	15	1	1
WBGene00001829	9768	7314	4988	2675	2511	2377
WBGene00001830	5619	4969	3670	2132	1920	2007
WBGene00001831	2853	3295	2881	1447	1355	1242
WBGene00001832	4036	3372	2488	1335	1267	1343
WBGene00001833	3839	3042	2377	1138	1136	1155
WBGene00001834	5858	5280	4042	2352	2075	2120
WBGene00001835	1851	2090	1884	972	890	892
WBGene00001836	2274	2130	1780	993	863	972
WBGene00001837	1003	806	683	429	317	342
WBGene00001838	1001	815	645	393	317	268
WBGene00001839	10	21	12	8	5	7
WBGene00001840	17858	18551	16509	8928	8766	8387
WBGene00001841	40	30	35	7	4	18
WBGene00001842	6	8	13	10	6	7
WBGene00001843	2229	2452	2468	2115	1758	1693
WBGene00001844	719	665	631	431	368	351
WBGene00001851	4280	4320	4204	2659	2329	2253
WBGene00001852	263	312	289	208	167	156
WBGene00001853	392	433	341	142	125	111
WBGene00001854	301	316	269	66	57	51
WBGene00001855	5464	4151	3402	1708	1576	1403
WBGene00001856	3614	3698	2960	1550	1679	1512
WBGene00001857	2	2	1	1	0	0
WBGene00001858	36	65	49	49	17	18
WBGene00001859	45	52	65	35	42	34
WBGene00001860	7223	6698	5070	3104	2624	2914
WBGene00001862	3616	4240	3929	2178	2104	2050
WBGene00001863	332	317	308	151	155	145
WBGene00001864	825	965	911	485	408	420
WBGene00001865	1881	1577	1179	670	620	734
WBGene00001867	1998	2524	2215	1156	1095	1099
WBGene00001869	3547	3936	3227	1722	1655	1685
WBGene00001872	1360	1435	1230	735	716	759
WBGene00001874	4362	4137	3406	1901	1782	1789
WBGene00001875	4	3	2	0	0	0
WBGene00001876	7	8	4	7	0	8
WBGene00001877	18	16	22	9	16	7
WBGene00001878	3	4	3	3	4	2
WBGene00001879	9	18	24	7	7	11
WBGene00001880	17	19	23	4	5	7
WBGene00001881	7	14	17	9	5	5
WBGene00001882	9	13	12	4	5	6
WBGene00001883	8	12	15	7	6	5
WBGene00001884	6	2	8	2	1	3
WBGene00001885	11	5	0	7	10	0
WBGene00001886	5	3	7	8	4	2
WBGene00001889	0	3	13	5	2	7
WBGene00001890	0	0	1	1	0	0
WBGene00001891	0	6	0	6	0	0
WBGene00001892	6	0	3	0	2	3
WBGene00001893	16	19	17	4	0	5
WBGene00001894	0	2	14	0	0	0
WBGene00001898	875	891	792	166	124	110
WBGene00001899	5	0	3	5	0	0
WBGene00001901	9	2	6	1	4	0
WBGene00001902	2	2	4	3	0	0
WBGene00001903	2	1	0	0	0	0
WBGene00001905	2	1	5	1	2	0
WBGene00001906	3	9	5	5	3	0
WBGene00001909	1449	1558	1645	971	864	845
WBGene00001910	386	477	491	252	246	225
WBGene00001911	953	1119	1195	775	650	622
WBGene00001912	42	48	54	37	32	32
WBGene00001913	0	0	0	0	0	0
WBGene00001914	48	48	51	20	18	15
WBGene00001915	1267	1563	1555	917	899	837
WBGene00001916	0	0	2	0	0	0
WBGene00001919	91	92	122	49	36	18
WBGene00001920	111	126	193	77	71	65
WBGene00001921	140	163	182	86	97	53
WBGene00001922	367	439	328	159	155	137
WBGene00001928	18	12	4	11	3	0
WBGene00001929	86	121	84	36	34	34
WBGene00001931	100	155	175	48	54	57
WBGene00001932	0	0	32	0	0	9
WBGene00001933	154	202	145	57	64	63
WBGene00001934	232	298	310	114	112	132
WBGene00001935	196	282	212	101	83	86
WBGene00001936	189	269	216	84	84	74
WBGene00001937	67	89	66	42	24	29
WBGene00001938	82	95	87	32	51	27
WBGene00001940	371	497	342	126	148	127
WBGene00001941	65	69	68	31	39	25
WBGene00001942	399	439	433	198	204	199
WBGene00001943	2	5	4	1	1	1
WBGene00001944	1	1	1	0	1	2
WBGene00001945	637	648	716	529	371	305
WBGene00001946	4786	5247	4907	2183	2085	1805
WBGene00001947	9	15	14	6	10	8
WBGene00001948	38	32	38	29	24	19
WBGene00001949	884	875	704	302	289	299
WBGene00001950	74	73	66	33	18	19
WBGene00001951	7	3	2	2	3	0
WBGene00001952	5	6	13	7	1	7
WBGene00001953	29	24	28	10	16	15
WBGene00001954	12	15	13	5	3	2
WBGene00001955	1528	1517	1510	1054	844	729
WBGene00001956	12	11	10	17	15	10
WBGene00001957	6	4	2	0	1	0
WBGene00001958	19	20	26	10	5	5
WBGene00001959	0	5	0	0	0	2
WBGene00001960	15	18	13	8	7	3
WBGene00001961	0	2	1	0	0	1
WBGene00001962	1	0	0	0	0	0
WBGene00001963	58	89	79	42	34	32
WBGene00001964	0	2	0	0	0	0
WBGene00001965	1	0	0	0	0	2
WBGene00001966	3	0	0	0	0	0
WBGene00001968	1	2	0	0	1	1
WBGene00001971	8083	6889	6328	3016	2513	2919
WBGene00001972	3222	3049	2611	1422	1269	1416
WBGene00001973	7023	7684	6279	3636	3337	3471
WBGene00001974	4549	5035	4137	2259	1952	2027
WBGene00001975	3342	4149	4009	2069	2082	2022
WBGene00001976	382	516	456	238	180	143
WBGene00001977	6290	5391	4216	1678	1746	1593
WBGene00001978	4300	4407	3339	2081	1812	1914
WBGene00001979	3550	3333	2718	1511	1410	1428
WBGene00001980	5399	4242	3071	1390	1157	1192
WBGene00001981	17	31	19	21	10	13
WBGene00001983	3931	3866	3186	1896	1758	1803
WBGene00001984	31	40	19	21	5	9
WBGene00001985	1467	1812	1555	824	793	709
WBGene00001986	63	57	87	66	68	39
WBGene00001987	33	24	24	4	7	10
WBGene00001988	38	62	35	10	8	9
WBGene00001989	72	76	61	23	24	28
WBGene00001990	27	25	21	4	6	12
WBGene00001991	53	52	62	59	45	34
WBGene00001992	22	19	20	15	5	0
WBGene00001993	6226	6599	6661	4789	4578	3689
WBGene00001994	1547	1378	1183	614	571	519
WBGene00001995	168	174	147	70	82	76
WBGene00001996	2674	3171	2987	1501	1451	1444
WBGene00001997	810	713	568	328	306	356
WBGene00001998	1630	1786	1504	824	799	818
WBGene00001999	11911	10838	9835	5319	4362	4821
WBGene00002000	12568	10444	9085	4585	4096	4430
WBGene00002001	4836	5270	4745	2774	2648	2721
WBGene00002002	2270	2965	2768	1357	1241	1194
WBGene00002003	2246	2344	1989	1055	949	1058
WBGene00002004	3351	3093	2459	1392	1206	1273
WBGene00002005	99196	82770	67769	31300	33040	31150
WBGene00002007	16254	12901	10052	7992	7004	6700
WBGene00002008	11137	9863	7823	5019	4498	4529
WBGene00002010	18028	15791	13198	7507	7189	6636
WBGene00002011	77	98	99	71	63	59
WBGene00002012	35	42	53	40	28	35
WBGene00002013	28	25	31	13	14	12
WBGene00002015	95	23	113	38	73	54
WBGene00002016	37	44	34	31	11	14
WBGene00002017	171	287	232	257	153	158
WBGene00002018	38	81	40	40	24	22
WBGene00002019	276	353	387	237	208	217
WBGene00002021	638	619	747	1241	847	739
WBGene00002023	1789	1933	2204	1775	1421	1161
WBGene00002024	4402	4574	4875	3563	2920	2862
WBGene00002025	12943	10717	9058	4432	4277	4295
WBGene00002026	32	44	34	23	6	15
WBGene00002027	13131	10922	8001	4569	4002	4396
WBGene00002028	2257	2252	1801	1002	875	916
WBGene00002029	389	406	323	192	165	191
WBGene00002030	67	80	70	21	22	19
WBGene00002031	423	492	437	210	191	213
WBGene00002032	3237	3497	3396	1931	1820	1824
WBGene00002033	1998	2077	1944	1164	1118	1074
WBGene00002034	2854	2670	2150	1151	1044	1137
WBGene00002035	3510	3205	2546	2036	1750	1875
WBGene00002036	6181	5647	4493	3264	2743	2820
WBGene00002037	1017	879	803	774	584	596
WBGene00002038	2108	2103	2114	1949	1806	1846
WBGene00002039	766	782	690	470	404	384
WBGene00002040	274	251	207	161	148	125
WBGene00002041	1388	1459	1352	1703	1482	1394
WBGene00002042	1019	1373	1250	621	608	683
WBGene00002043	1746	1758	1415	1466	1314	1497
WBGene00002044	1431	1284	1198	930	892	931
WBGene00002045	51048	60309	56593	31680	30409	28366
WBGene00002046	2864	3490	3415	1804	1791	1630
WBGene00002047	3294	2523	1813	889	810	797
WBGene00002048	1330	1402	1282	273	287	260
WBGene00002050	1312	1542	1648	946	973	927
WBGene00002051	25	10	15	31	9	7
WBGene00002052	2924	3216	3495	3396	2576	2796
WBGene00002053	5983	6315	6760	4580	4006	4141
WBGene00002054	3147	3178	3611	4457	3552	3076
WBGene00002055	965	937	1029	609	453	438
WBGene00002056	4273	4021	4490	5213	4500	3964
WBGene00002057	380	382	407	377	330	335
WBGene00002058	327	380	381	1272	1046	1158
WBGene00002059	8530	10370	10399	5944	5542	5207
WBGene00002060	1060	1216	1120	705	690	626
WBGene00002061	10430	9887	8052	3975	4188	4085
WBGene00002062	268	300	283	178	148	138
WBGene00002063	283	303	260	127	119	168
WBGene00002064	37760	48792	50146	27007	28543	24315
WBGene00002065	4645	5267	5678	3360	3087	2713
WBGene00002066	17571	15319	12482	6614	6324	6641
WBGene00002067	549	634	601	232	229	216
WBGene00002068	5833	6211	4878	2455	2318	2251
WBGene00002069	177	167	199	144	91	121
WBGene00002070	5839	5755	4291	2751	2552	2609
WBGene00002071	1507	1466	1320	832	806	831
WBGene00002072	6393	7176	6358	3479	3287	3343
WBGene00002073	17117	16056	12654	6523	6563	6643
WBGene00002074	11763	9745	7599	4419	3933	3985
WBGene00002075	5203	4168	3176	1645	1499	1542
WBGene00002076	7016	5938	4544	2635	2395	2507
WBGene00002077	16814	14190	11123	4842	5159	5254
WBGene00002078	16782	13340	10157	5634	4905	5100
WBGene00002079	8229	5842	4690	2358	2070	1986
WBGene00002080	5014	4760	3819	2198	2059	2228
WBGene00002081	1310	1336	1135	798	704	781
WBGene00002083	22917	20695	17180	10048	9695	9298
WBGene00002084	13	23	22	10	6	9
WBGene00002085	2	3	4	6	3	3
WBGene00002086	38	40	44	49	22	25
WBGene00002087	14	21	31	13	14	12
WBGene00002088	13	27	24	7	11	8
WBGene00002089	1	1	4	2	3	1
WBGene00002090	36	33	43	248	313	325
[truncated: 17,262 more rows]

## Sheet: normalized
	10578X1	10578X2	10578X3	10578X7	10578X8	10578X9
[truncated: 18,897 more rows]

[truncated: 3 more sheets: Regularized Log Transform, samples, ensembl]
