# Supplementary material for: NHR-14 loss of function couples intestinal iron uptake with innate immunity in C. elegans through PQM-1 signaling
Source: eLife journal article supplement (doi:10.7554/elife.44674), 2019-09-18
Supplement: supp [file elife-44674-supp-v1.zip › elife_poa_e44674_Figure_4_figure_supplement_3.pdf]

Figure 4 - figure supplement 3

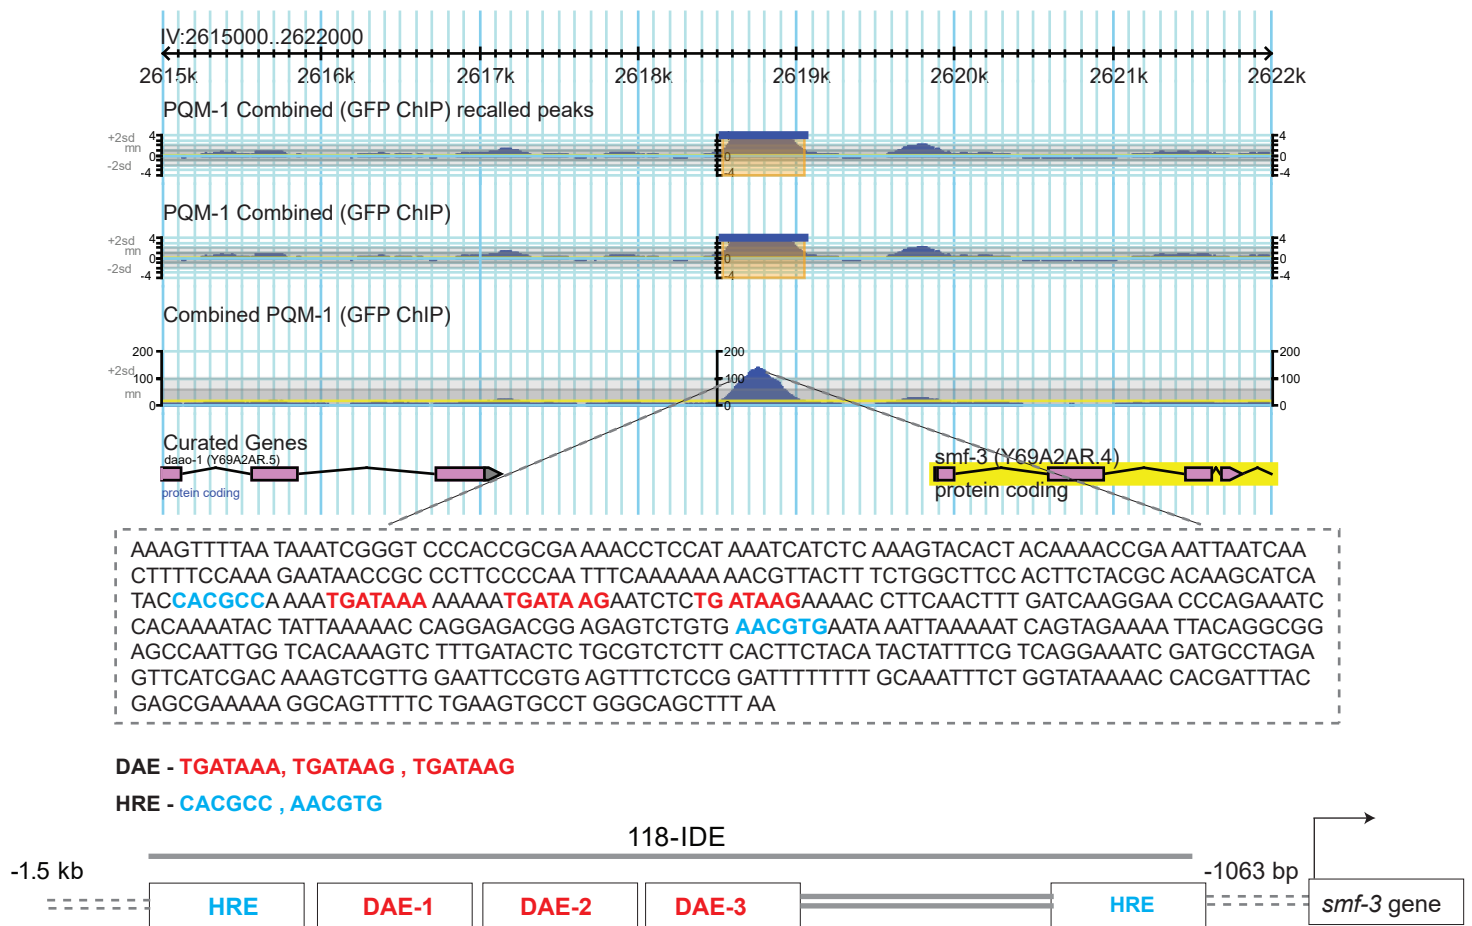

[https://wormbase.org/tools/genome/gbrowse/c\\_elegans\\_PRJNA13758/#](https://wormbase.org/tools/genome/gbrowse/c_elegans_PRJNA13758/#)
