# Supplementary material for: NHR-14 loss of function couples intestinal iron uptake with innate immunity in C. elegans through PQM-1 signaling
Source: eLife journal article supplement (doi:10.7554/elife.44674), 2019-09-18
Supplement: supp [file elife-44674-supp-v1.zip › elife_poa_e44674_Figure_5_source_data_1.xls]

## Sheet: UP nhr-14(tm1473) tissues
Figure 5 - table supplement 1: Overlap between nhr-14(tm1473) upregulated genes with C. elegans tissue-specific expression datasets using WormExp v1.
Category	Term	Counts	ListSize	PopHit	Pop Size	Pvalue	Bonferroni	FDR	OverlappedID	Refs
Tissue	Positive Enriched Intestinal genes	218	568	2431	29469	2.98e-89	2.77e-87	2.77e-87	WBGene00003613;WBGene00006628;WBGene00012961;WBGene00008199;WBGene00007097;WBGene00012683;WBGene00022644;WBGene00018823;WBGene00010660;WBGene00008850;WBGene00009710;WBGene00012101;WBGene00021872;WBGene00013119;WBGene00022645;WBGene00016004;WBGene00011190;WBGene00008483;WBGene00009488;WBGene00010605;WBGene00001770;WBGene00008301;WBGene00010747;WBGene00016450;WBGene00015933;WBGene00011262;WBGene000…	http://www.ncbi.nlm.nih.gov/pubmed/22467213
Tissue	Enriched in AWB olfactory and AFD thermosensory neurons	91	568	535	29469	1.75e-57	1.63e-55	5.43e-56	WBGene00012961;WBGene00011844;WBGene00008199;WBGene00007097;WBGene00022644;WBGene00018823;WBGene00008850;WBGene00012101;WBGene00002058;WBGene00000783;WBGene00020760;WBGene00022645;WBGene00019744;WBGene00004811;WBGene00010605;WBGene00009984;WBGene00008301;WBGene00021518;WBGene00015216;WBGene00010747;WBGene00003090;WBGene00017892;WBGene00007833;WBGene00019682;WBGene00009192;WBGene00018725;WBGene000…	http://www.ncbi.nlm.nih.gov/pubmed/16626960
Positive enriched intestinal genes (Haenni et al., 2012)		Enriched in AWB olfactory and AFD thermosensory neurons (Vartiainen et al., 2006)
Wormbase ID	Gene name	Wormbase ID	Gene name
WBGene00003613	nhr-14	WBGene00012961	Y47H10A.5
WBGene00006628	tsp-2	WBGene00011844	T19C9.8
WBGene00012961	Y47H10A.5	WBGene00008199	C49C3.9
WBGene00008199	C49C3.9	WBGene00007097	B0024.4
WBGene00007097	B0024.4	WBGene00022644	dod-19
WBGene00012683	asp-17	WBGene00018823	F54E2.1
WBGene00022644	dod-19	WBGene00008850	F15B9.6
WBGene00018823	F54E2.1	WBGene00012101	zip-10
WBGene00010660	K08D8.6	WBGene00002058	ifd-2
WBGene00008850	F15B9.6	WBGene00000783	cpr-3
WBGene00009710	F44G3.10	WBGene00020760	T24C4.4
WBGene00012101	zip-10	WBGene00022645	ZK6.11
WBGene00021872	clec-85	WBGene00019744	M02H5.8
WBGene00013119	Y51H4A.25	WBGene00004811	skr-5
WBGene00022645	ZK6.11	WBGene00010605	K06G5.1
WBGene00016004	C18H9.6	WBGene00009984	F53F1.6
WBGene00011190	swt-6	WBGene00008301	pals-39
WBGene00008483	E04D5.4	WBGene00021518	hpo-6
WBGene00009488	oac-20	WBGene00015216	valv-1
WBGene00010605	K06G5.1	WBGene00010747	K10D11.3
WBGene00001770	gst-22	WBGene00003090	lys-1
WBGene00008301	pals-39	WBGene00017892	F28B4.3
WBGene00010747	K10D11.3	WBGene00007833	oac-6
WBGene00016450	clec-5	WBGene00019682	K12H4.7
WBGene00015933	C17H12.8	WBGene00009192	asah-2
WBGene00011262	pho-8	WBGene00018725	kreg-1
WBGene00044206	T26H5.9	WBGene00016218	pals-23
WBGene00003090	lys-1	WBGene00019660	K11H12.4
WBGene00008988	F20G2.5	WBGene00010977	R02D5.3
WBGene00009433	F35E12.9	WBGene00020579	T19D12.4
WBGene00001158	ech-9	WBGene00007932	zip-5
WBGene00021503	ctsa-4.2	WBGene00021121	W09G12.7
WBGene00007833	oac-6	WBGene00006470	tag-120
WBGene00013923	ghi-1	WBGene00011856	T20D3.2
WBGene00015859	C16D9.4	WBGene00014136	ZK896.5
WBGene00044469	clec-173	WBGene00018984	F56F10.1
WBGene00008492	F01D5.1	WBGene00021354	fpn-1.1
WBGene00009971	F53C11.1	WBGene00015280	C01B10.6
WBGene00010901	M28.10	WBGene00008486	ugt-44
WBGene00010256	hrg-3	WBGene00019746	M03A1.3
WBGene00015602	fbxa-158	WBGene00008741	ctsa-1.2
WBGene00016218	pals-23	WBGene00008698	F11D11.3
WBGene00000799	crn-6	WBGene00002274	lec-11
WBGene00017764	F25A2.1	WBGene00012782	Y43C5A.2
WBGene00019660	K11H12.4	WBGene00018874	tag-234
WBGene00010977	R02D5.3	WBGene00003091	lys-2
WBGene00001786	gst-38	WBGene00004796	sid-2
WBGene00020579	T19D12.4	WBGene00009914	F49H6.13
WBGene00020981	W03D2.6	WBGene00006429	arrd-3
WBGene00016219	pals-24	WBGene00016717	math-22
WBGene00016190	rcs-1	WBGene00009796	F46G10.1
WBGene00016425	C34H4.2	WBGene00021253	Y22D7AL.15
WBGene00044280	W02A2.9	WBGene00019957	R08E3.1
WBGene00009431	dct-17	WBGene00008577	F08G2.5
WBGene00007932	zip-5	WBGene00002257	lbp-5
WBGene00044468	Y69A2AL.2	WBGene00002269	lec-6
WBGene00011167	chil-23	WBGene00020456	fbxa-60
WBGene00007368	C06B8.2	WBGene00008194	C49C3.4
WBGene00019914	clec-150	WBGene00010049	F54D5.3
WBGene00006470	tag-120	WBGene00003092	lys-3
WBGene00021339	Y34F4.4	WBGene00004020	pho-1
WBGene00010128	F55G11.8	WBGene00002188	kgb-2
WBGene00018984	F56F10.1	WBGene00018562	F47D12.6
WBGene00010050	F54D5.4	WBGene00022562	ZC204.12
WBGene00008495	F01D5.5	WBGene00008477	clec-17
WBGene00003097	lys-8	WBGene00012593	nspe-7
WBGene00019746	M03A1.3	WBGene00018951	F56C9.7
WBGene00017308	F09F9.3	WBGene00021580	clec-174
WBGene00014106	ZK856.5	WBGene00012144	T28H10.3
WBGene00008831	F14H3.12	WBGene00009041	cut-3
WBGene00008698	F11D11.3	WBGene00021325	Y34B4A.9
WBGene00012323	oac-54	WBGene00012529	Y32F6A.4
WBGene00010684	K08F9.1	WBGene00004810	skr-4
WBGene00020325	bath-46	WBGene00016555	math-20
WBGene00010041	F54C9.3	WBGene00008229	C50F4.1
WBGene00014132	ZK896.1	WBGene00009008	F21D5.3
WBGene00019931	R07C12.1	WBGene00016542	C39H7.4
WBGene00009957	F53B2.8	WBGene00013901	ugt-16
WBGene00012947	Y47H9C.1	WBGene00007506	C10C5.2
WBGene00017751	F23F12.3	WBGene00006609	tre-3
WBGene00018874	tag-234	WBGene00020256	T05C3.6
WBGene00015599	fbxa-164	WBGene00020187	gsp-4
WBGene00011166	chil-22	WBGene00011330	T01D3.6
WBGene00023483	Y75B8A.39	WBGene00000216	asp-3
WBGene00017417	F13B6.2	WBGene00000738	col-165
WBGene00019058	F58F9.4	WBGene00010070	nep-17
WBGene00003091	lys-2	WBGene00020329	bath-26
WBGene00004796	sid-2	WBGene00011508	T05H10.3
WBGene00009914	F49H6.13	WBGene00021768	Y51F10.7
WBGene00006429	arrd-3	WBGene00017591	F19C7.1
WBGene00013037	Y49E10.18	WBGene00018210	F39G3.5
WBGene00011517	cgt-1
WBGene00016717	math-22
WBGene00021517	Y41D4B.15
WBGene00015537	C06E4.8
WBGene00018645	F49F1.5
WBGene00004172	pqn-92
WBGene00005188	srg-31
WBGene00007857	C31H5.6
WBGene00007694	C23H4.6
WBGene00010998	R03G8.3
WBGene00010769	asah-1
WBGene00015259	dod-20
WBGene00008577	F08G2.5
WBGene00009396	clec-65
WBGene00013608	clec-35
WBGene00010125	dod-22
WBGene00019057	F58F9.3
WBGene00021772	math-45
WBGene00006464	bath-47
WBGene00005548	sri-36
WBGene00002257	lbp-5
WBGene00017386	nspd-5
WBGene00002269	lec-6
WBGene00044381	K10G6.5
WBGene00009432	cld-9
WBGene00044787	pals-36
WBGene00015079	B0244.4
WBGene00008633	fbxa-18
WBGene00044783	T26H5.10
WBGene00018971	clec-67
WBGene00008255	C51E3.10
WBGene00020456	fbxa-60
WBGene00008891	clec-42
WBGene00017594	F19C7.4
WBGene00010049	F54D5.3
WBGene00021582	clec-71
WBGene00016335	gba-1
WBGene00077525	C41G7.8
WBGene00004020	pho-1
WBGene00018562	F47D12.6
WBGene00016058	nspd-3
WBGene00011852	clec-26
WBGene00022562	ZC204.12
WBGene00015574	irg-1
WBGene00007072	ugt-1
WBGene00008477	clec-17
WBGene00015080	B0244.5
WBGene00016260	rege-1
WBGene00018951	F56C9.7
WBGene00020357	T08E11.1
WBGene00008553	F07C6.2
WBGene00015152	B0348.2
WBGene00013609	clec-37
WBGene00015081	B0244.6
WBGene00012144	T28H10.3
WBGene00009226	cyp-37B1
WBGene00010822	M01G12.9
WBGene00021072	W07B8.4
WBGene00004859	sma-5
WBGene00021160	gba-4
WBGene00020449	fbxa-54
WBGene00044332	clec-36
WBGene00021325	Y34B4A.9
WBGene00000841	cul-6
WBGene00007685	C18E9.5
WBGene00012529	Y32F6A.4
WBGene00009903	F49E12.10
WBGene00001603	gln-2
WBGene00013197	ttm-5
WBGene00009517	clec-167
WBGene00010545	cbp-2
WBGene00016555	math-20
WBGene00008101	C44H9.6
WBGene00001501	ftn-2
WBGene00017312	pitr-5
WBGene00044382	Y14H12A.2
WBGene00009856	clec-24
WBGene00006533	tba-7
WBGene00016542	C39H7.4
WBGene00017103	klo-2
WBGene00011539	fbxa-135
WBGene00019014	F57C12.2
WBGene00020921	W01C8.5
WBGene00022572	ZC239.14
WBGene00009798	F46G10.4
WBGene00021321	Y34B4A.5
WBGene00020972	trpl-2
WBGene00005657	srr-6
WBGene00007506	C10C5.2
WBGene00013439	Y66D12A.13
WBGene00020256	T05C3.6
WBGene00012201	W02B12.1
WBGene00012464	arrd-7
WBGene00015085	B0244.10
WBGene00007322	C05B5.5
WBGene00008498	F01D5.8
WBGene00000136	amt-4
WBGene00011330	T01D3.6
WBGene00004023	pho-4
WBGene00000216	asp-3
WBGene00008296	cdr-2
WBGene00012028	srz-99
WBGene00001506	fut-2
WBGene00003877	pept-1
WBGene00010070	nep-17
WBGene00009857	clec-28
WBGene00020329	bath-26
WBGene00008644	F10C2.3
WBGene00015601	fbxa-166
WBGene00017071	aagr-1
WBGene00022337	pals-16
WBGene00021768	Y51F10.7
WBGene00017591	F19C7.1
WBGene00018210	F39G3.5
WBGene00022848	ZK1055.7
WBGene00017364	clec-7
WBGene00044349	Y71G12B.32
WBGene00044207	Y6G8.5
WBGene00010123	F55G11.2
WBGene00016282	C31B8.7
WBGene00015713	C12D12.1
WBGene00019858	R03H10.6
WBGene00008596	clec-54
WBGene00021322	Y34B4A.6
WBGene00005703	sru-40
WBGene00019166	tat-2
WBGene00019115	nhr-195

## Sheet: DOWN nhr-14(tm1473) tissues
Figure 5 - source data 1: Overlap between upregulated and downregulated nhr-14(tm1473) genes with published C. elegans tissue-specific expression datasets using WormExp v1.
Category	Term	Counts	ListSize	PopHit	Pop Size	Pvalue	Bonferroni	FDR	OverlappedID	Refs
Tissue	WT-Pico Pan-neural Depleted Genes	92	260	1278	29469	2.741e-57	2.54913e-55	2.54913e-55	WBGene00012186;WBGene00009926;WBGene00016422;WBGene00006366;WBGene00012261;WBGene00005017;WBGene00000606;WBGene00012256;WBGene00018572;WBGene00022816;WBGene00004398;WBGene00004397;WBGene00018418;WBGene00012257;WBGene00007479;WBGene00021095;WBGene00019272;WBGene00001070;WBGene00001064;WBGene00022103;WBGene00022679;WBGene00012255;WBGene00005018;WBGene00001074;WBGene00008605;WBGene00004219;WBGene000…	http://www.ncbi.nlm.nih.gov/pubmed/18284693
Tissue	Hypodermis enriched core	38	260	177	29469	4.51113e-40	4.19535e-38	2.09768e-38	WBGene00005016;WBGene00004397;WBGene00021095;WBGene00001072;WBGene00009983;WBGene00001065;WBGene00001067;WBGene00004133;WBGene00022274;WBGene00004232;WBGene00010673;WBGene00015339;WBGene00018737;WBGene00015841;WBGene00017307;WBGene00022415;WBGene00017716;WBGene00017535;WBGene00022591;WBGene00011838;WBGene00008851;WBGene00012032;WBGene00016133;WBGene00007264;WBGene00006947;WBGene00001714;WBGene000…	http://www.ncbi.nlm.nih.gov/pubmed/21177967
WT-Pico Pan-neural depleted genes (Watson et al., 2008)		Hypodermis-enriched core (Spencer et al., 2011)
Wormbase ID	Public name	Wormbase ID	Public name
WBGene00012186	mlt-11	WBGene00005016	sqt-1
WBGene00009926	noah-2	WBGene00004397	rol-6
WBGene00016422	noah-1	WBGene00021095	mlt-8
WBGene00006366	sym-1	WBGene00001072	dpy-10
WBGene00012261	lpr-3	WBGene00009983	cut-2
WBGene00005017	sqt-2	WBGene00001065	dpy-3
WBGene00000606	col-17	WBGene00001067	dpy-5
WBGene00012256	lpr-5	WBGene00004133	abu-13
WBGene00018572	lin-42	WBGene00022274	Y73E7A.8
WBGene00022816	fbn-1	WBGene00004232	ptr-18
WBGene00004398	rol-8	WBGene00010673	K08E7.5
WBGene00004397	rol-6	WBGene00015339	C02E7.6
WBGene00018418	F44E2.4	WBGene00018737	F53B1.4
WBGene00012257	lpr-4	WBGene00015841	skpo-2
WBGene00007479	C09F9.2	WBGene00017307	F09F9.2
WBGene00021095	mlt-8	WBGene00022415	Y102A11A.5
WBGene00019272	H42K12.3	WBGene00017716	sups-1
WBGene00001070	dpy-8	WBGene00017535	atf-8
WBGene00001064	dpy-2	WBGene00022591	cuti-1
WBGene00022103	cdh-12	WBGene00011838	T19C4.1
WBGene00022679	ZK180.5	WBGene00008851	F15B9.8
WBGene00012255	lpr-6	WBGene00012032	T26C5.2
WBGene00005018	sqt-3	WBGene00016133	C26B9.3
WBGene00001074	dpy-13	WBGene00007264	C02F4.4
WBGene00008605	mlt-9	WBGene00006947	wrt-1
WBGene00004219	ptr-4	WBGene00001714	grl-5
WBGene00001072	dpy-10	WBGene00020560	T19C3.2
WBGene00000928	dao-2	WBGene00009261	F30A10.2
WBGene00000740	col-167	WBGene00019730	asns-2
WBGene00014183	ZK1025.3	WBGene00015300	C01F1.5
WBGene00001066	dpy-4	WBGene00007552	C13C12.2
WBGene00000402	cdh-10	WBGene00009218	acs-20
WBGene00009983	cut-2	WBGene00012433	Y11D7A.9
WBGene00009094	F23H12.5	WBGene00015781	C14F11.6
WBGene00001725	grl-16	WBGene00008496	F01D5.6
WBGene00000722	col-149	WBGene00016329	osr-1
WBGene00000665	col-90	WBGene00012540	Y37A1B.7
WBGene00001065	dpy-3	WBGene00007210	agmo-1
WBGene00001071	dpy-9
WBGene00017991	clec-180
WBGene00001067	dpy-5
WBGene00017998	F33D4.6
WBGene00004133	abu-13
WBGene00001068	dpy-6
WBGene00014182	ZK1025.2
WBGene00020194	T03G6.1
WBGene00000039	acn-1
WBGene00007999	tag-297
WBGene00022680	ZK180.6
WBGene00003057	lon-3
WBGene00001716	grl-7
WBGene00019855	R03H10.2
WBGene00002827	let-653
WBGene00000611	col-34
WBGene00000399	cdh-7
WBGene00008963	F19H8.2
WBGene00020554	T19A5.3
WBGene00000641	col-65
WBGene00011107	R07E3.6
WBGene00001188	egl-20
WBGene00015339	C02E7.6
WBGene00003681	nhr-91
WBGene00020083	R57.2
WBGene00015841	skpo-2
WBGene00018297	F41F3.3
WBGene00021415	nsy-4
WBGene00010742	K10D6.2
WBGene00000741	col-168
WBGene00017307	F09F9.2
WBGene00019212	zmp-2
WBGene00017716	sups-1
WBGene00007916	C34C6.3
WBGene00000746	col-173
WBGene00022591	cuti-1
WBGene00017418	F13B6.3
WBGene00011838	T19C4.1
WBGene00012939	subs-4
WBGene00022033	Y65B4BL.1
WBGene00007264	C02F4.4
WBGene00017438	F13H8.5
WBGene00019318	K02E10.4
WBGene00018487	F46C8.8
WBGene00003703	nhr-113
WBGene00001714	grl-5
WBGene00019759	M03F4.6
WBGene00009133	bed-3
WBGene00000749	col-176
WBGene00021529	Y41G9A.5
WBGene00016329	osr-1
WBGene00000649	col-73
WBGene00018256	cutl-28
WBGene00003089	ltd-1
