# Supplementary material for: NHR-14 loss of function couples intestinal iron uptake with innate immunity in C. elegans through PQM-1 signaling
Source: eLife journal article supplement (doi:10.7554/elife.44674), 2019-09-18
Supplement: supp [file elife-44674-supp-v1.zip › elife_poa_e44674_Figure_6_source_data_1.xlsx]

## Sheet: Overlap
Figure 6 - source data 1: Overlap between upregulated nhr-14(tm1473) genes and published pathogen infection datasets at log fold change > 1. Genes in common are listed below.
P. aeruginosa (Shapira et al., 2006) vs nhr-14(tm1473)		P. aeruginosa (Troemel et al,. 2006) vs nhr-14(tm1473)		P. luminescens (Wong et al., 2007) vs nhr-14(tm1473)		S. aureus (Visvikis et al., 2014) vs nhr-14(tm1473)		E. faecalis (Wong et al., 2007) vs nhr-14(tm1473)		S. marscens (Engelmann et al., 2011) vs nhr-14(tm1473)
Gene ID	Gene name	Gene ID	Gene name	Gene ID	Gene name	Gene ID	Gene name	Gene ID	Gene name	Gene ID	Gene name
C49C3.9	C49C3.9	C02F5.11	tsp-2	Y47H10A.5	Y47H10A.5	F09B9.1	oac-14	Y39B6A.24	asp-17	C02F5.11	tsp-2
C32H11.12	dod-24	Y47H10A.5	Y47H10A.5	C49C3.9	C49C3.9	F25E2.4	ifd-2	C14C6.5	C14C6.5	C02F5.8	tsp-1
ZK6.10	dod-19	C02F5.8	tsp-1	B0024.4	B0024.4	Y51H4A.25	Y51H4A.25	C02A12.4	lys-7	T19C9.8	T19C9.8
B0365.6	clec-41	C49C3.9	C49C3.9	Y39B6A.24	asp-17	F53F1.6	F53F1.6	F25E2.4	ifd-2	C49C3.9	C49C3.9
C14C6.5	C14C6.5	B0024.4	B0024.4	ZK6.10	dod-19	B0496.7	valv-1	H34I24.2	H34I24.2	B0024.4	B0024.4
F54E2.1	F54E2.1	C32H11.12	dod-24	F54E2.1	F54E2.1	T26H5.9	T26H5.9	K06G5.1	K06G5.1	F49E12.2	dod-23
F44G3.10	F44G3.10	K08D8.6	K08D8.6	K08D8.6	K08D8.6	F11A5.9	F11A5.9	Y22F5A.4	lys-1	C32H11.12	dod-24
T27F2.4	zip-10	F09B9.1	oac-14	R07B1.10	lec-8	F27E5.1	asah-2	F28B4.3	F28B4.3	Y39B6A.24	asp-17
R07B1.10	lec-8	K10D11.5	K10D11.5	T10H4.12	cpr-3	F53A9.2	kreg-1	Y40D12A.2	ctsa-2	B0365.6	clec-41
T10H4.12	cpr-3	T27F2.4	zip-10	T24C4.4	T24C4.4	W02A2.9	W02A2.9	F35C5.6	clec-63	C14C6.5	C14C6.5
T24C4.4	T24C4.4	F25E2.4	ifd-2	M02H5.8	M02H5.8	W09G12.7	W09G12.7	F27E5.1	asah-2	F54E2.1	F54E2.1
ZK6.11	ZK6.11	T10H4.12	cpr-3	C09F12.1	clc-1	Y69A2AL.2	Y69A2AL.2	K10B2.2	ctsa-1	K08D8.6	K08D8.6
C09F12.1	clc-1	T24C4.4	T24C4.4	F27C8.4	spp-18	R09D1.11	chil-23	ZK1251.6	msp-76	F15B9.6	F15B9.6
F27C8.4	spp-18	C18H9.6	C18H9.6	K06G5.1	K06G5.1	F14H3.12	F14H3.12	F54C9.3	F54C9.3	F56A6.1	sago-2
F21H7.1	gst-22	F47H4.10	skr-5	C32H11.9	C32H11.9	F54C9.3	F54C9.3	Y43C5A.2	Y43C5A.2	F44G3.10	F44G3.10
Y41D4B.16	hpo-6	C09F12.1	clc-1	F21H7.1	gst-22	F53B2.8	F53B2.8	C14C6.2	C14C6.2	C24G7.2	acd-1
B0496.7	valv-1	F21H7.1	gst-22	Y22F5A.4	lys-1	Y47H9C.1	Y47H9C.1	R08E3.1	R08E3.1	K10D11.5	K10D11.5
Y22F5A.4	lys-1	Y41D4B.16	hpo-6	F28B4.3	F28B4.3	C31B8.4	pals-32	K07F5.2	msp-10	F25E2.4	ifd-2
F20G2.5	F20G2.5	B0496.7	valv-1	F35C5.6	clec-63	F55C12.7	tag-234	T13F2.11	msp-78	R07B1.10	lec-8
F35C5.5	clec-62	C17H12.8	C17H12.8	F53A9.2	kreg-1	F19C7.2	F19C7.2	C34F11.6	msp-49	Y54G2A.6	clec-85
F01D5.3	F01D5.3	F20G2.5	F20G2.5	F35E8.8	gst-38	C06E4.8	C06E4.8	K11D2.2	asah-1	Y51H4A.25	Y51H4A.25
F01D5.1	F01D5.1	F01G10.3	ech-9	T19D12.4	T19D12.4	Y22D7AL.15	Y22D7AL.15	ZK354.11	msp-59	T10H4.12	cpr-3
K12H4.7	K12H4.7	Y40D12A.2	ctsa-2	F35E12.7	dct-17	F35C5.8	clec-65	C17H12.6	C17H12.6	T24C4.4	T24C4.4
C29F9.3	pals-23	C31A11.5	oac-6	T24B8.5	T24B8.5	R01E6.3	cah-4	F10A3.2	fbxa-88	C18H9.6	C18H9.6
F35E8.8	gst-38	C16D9.4	C16D9.4	F40F9.2	tag-120	F28D1.5	thn-2	F28D1.5	thn-2	R10D12.9	swt-6
T19D12.4	T19D12.4	F53C11.1	F53C11.1	T20D3.2	T20D3.2	T26H5.10	T26H5.10	K08F4.8	msp-38	H34I24.2	H34I24.2
C34H4.2	C34H4.2	F53A9.2	kreg-1	F54D5.4	F54D5.4	C23G10.11	C23G10.11	W01A11.4	lec-10	M02H5.8	M02H5.8
F35E12.7	dct-17	C29F9.3	pals-23	F01D4.2	ugt-44	T12B5.10	fbxa-60	F54D5.3	F54D5.3	C09F12.1	clc-1
Y40B10A.2	comt-3	K10B2.2	ctsa-1	F13D12.6	F13D12.6	Y22F5A.6	lys-3	F32H5.1	F32H5.1	F36G9.12	oac-20
T24B8.5	T24B8.5	F25A2.1	F25A2.1	F54C9.3	F54C9.3	ZC204.12	ZC204.12	T28H11.1	ssq-4	K06G5.1	K06G5.1
F55G11.8	F55G11.8	K10D11.6	K10D11.6	Y46D2A.2	Y46D2A.2	Y47D3A.32	Y47D3A.32	C28C12.5	spp-8	F21H7.1	gst-22
T20D3.2	T20D3.2	K11H12.4	K11H12.4	ZK896.4	ZK896.4	C28C12.5	spp-8	T28H10.3	T28H10.3	Y41D4B.16	hpo-6
F56F10.1	F56F10.1	R02D5.3	R02D5.3	Y22F5A.5	lys-2	T28H10.3	T28H10.3	Y34B4A.9	Y34B4A.9	K10D11.3	K10D11.3
F54D5.4	F54D5.4	F35E8.8	gst-38	C17F4.7	C17F4.7	F28G4.1	cyp-37B1	Y57G11A.2	Y57G11A.2	C17H12.8	C17H12.8
F01D5.5	F01D5.5	C29F9.4	pals-24	F46G10.1	F46G10.1	W07B8.4	W07B8.4	Y43C5A.1	nspd-7	R13H4.3	pho-8
F01D4.2	ugt-44	F35E12.7	dct-17	B0554.6	dod-20	C15A11.7	C15A11.7	C15C8.3	hrg-7	Y39D8A.1	Y39D8A.1
F11D11.3	F11D11.3	C34D1.5	zip-5	C45B2.1	C45B2.1	F49E12.10	F49E12.10	K05F1.2	msp-142	Y22F5A.4	lys-1
F38A5.3	lec-11	Y75B8A.28	Y75B8A.28	Y55B1AR.1	lec-6	K03H1.10	cbp-2	T23B3.5	T23B3.5	F20G2.5	F20G2.5
ZK1320.2	ZK1320.2	F55G11.8	F55G11.8	C49C3.4	C49C3.4	C50F4.1	C50F4.1	T25C12.2	spp-9	F35E12.9	F35E12.9
Y22F5A.5	lys-2	ZK896.5	ZK896.5	F54D5.3	F54D5.3	D1037.3	ftn-2	W05E10.4	tre-3	F01G10.3	ech-9
C54D1.2	clec-86	F01D5.5	F01D5.5	Y54G2A.7	Y54G2A.7	C15C8.3	hrg-7	C49G7.3	C49G7.3	C34B7.3	cyp-36A1
C17H12.6	C17H12.6	F01D4.2	ugt-44	C48B4.1	acox-1.5	T07H3.3	math-38	Y113G7C.1	Y113G7C.1	F35C5.5	clec-62
F08G2.5	F08G2.5	F14H3.12	F14H3.12	T06E6.3	fbxa-199	C13D9.1	srr-6	H22K11.1	asp-3	F28B4.3	F28B4.3
F55G11.5	dod-22	F38A5.3	lec-11	Y46C8AL.2	clec-174	T01D3.6	T01D3.6	F54F11.2	nep-17	Y40D12A.2	ctsa-4.2
F35E12.8	cld-9	Y46D2A.2	Y46D2A.2	T28H10.3	T28H10.3	D2096.3	aagr-1	F14D7.7	F14D7.7	C31A11.5	oac-6
F49F1.1	drd-50	F53B2.8	F53B2.8	Y34B4A.9	Y34B4A.9	F47B8.4	F47B8.4	F08H9.8	clec-54	F01D5.3	F01D5.3
F56D6.2	clec-67	ZK896.4	ZK896.4	C15A11.7	C15A11.7	F10G2.3	clec-7			F35C5.6	clec-63
T12B5.10	fbxa-60	F55C12.7	tag-234	F49E12.10	F49E12.10					C16D9.4	C16D9.4
ZC47.4	fbxa-30	ZK1290.10	ZK1290.10	C02F5.5	C02F5.5					T26C12.6	clec-173
C07G3.2	irg-1	F49H6.13	F49H6.13	D2062.6	msrp-6					F01D5.1	F01D5.1
F56C9.7	F56C9.7	C54D1.2	clec-86	C44H9.6	C44H9.6					K12H4.7	K12H4.7
C26B9.5	C26B9.5	Y22D7AL.15	Y22D7AL.15	T05A7.6	T05A7.6					F53C11.1	F53C11.1
T28D6.2	tba-7	C17H12.6	C17H12.6	T23B3.5	T23B3.5					M28.10	M28.10
C39H7.4	C39H7.4	F08G2.5	F08G2.5	F49H6.3	F49H6.3					C08E3.10	fbxa-158
C10C5.2	C10C5.2	F55G11.5	dod-22	T16D1.2	pho-4					F09C8.1	F09C8.1
T01D3.6	T01D3.6	F35E12.8	cld-9	H22K11.1	asp-3					C29F9.3	pals-23
K10D11.1	dod-17	F56D6.2	clec-67	F10C2.3	F10C2.3					Y26D4A.3	Y26D4A.3
F19C7.1	F19C7.1	C23G10.11	C23G10.11	Y51F10.7	Y51F10.7					F52E1.14	F52E1.14
F39G3.5	F39G3.5	ZC443.5	ugt-18	F19C7.1	F19C7.1					K10B2.2	ctsa-4.1
F47B8.4	F47B8.4	Y22F5A.6	lys-3	Y34B4A.6	Y34B4A.6					K04H4.6	crn-6
ZK1055.7	ZK1055.7	Y46C8AL.4	clec-71							F25A2.1	F25A2.1
F55G11.2	F55G11.2	C49G7.7	C49G7.7							K10D11.6	K10D11.6
		C07G3.2	irg-1							K11H12.4	K11H12.4
		AC3.7	ugt-1							F35E8.8	gst-38
		Y46C8AL.2	clec-174							W03D2.6	W03D2.6
		M01G12.9	M01G12.9							C29F9.4	pals-24
		C15A11.7	C15A11.7							C28G1.5	rcs-1
		K08E7.7	cul-6							C34H4.2	C34H4.2
		Y54E5A.1	ttm-5							W02G9.4	W02G9.4
		C50F4.1	C50F4.1							F35E12.7	dct-17
		C39H7.4	C39H7.4							C34D1.5	zip-5
		ZC443.6	ugt-16							T24B8.5	T24B8.5
		C13D9.1	srr-6							Y69A2AL.2	Y69A2AL.2
		C10C5.2	C10C5.2							C44B7.8	pmp-1
		T01D3.6	T01D3.6							R09D1.11	chil-23
		K10D11.1	dod-17							C06B8.2	C06B8.2
		F55G11.2	F55G11.2							Y75B8A.28	Y75B8A.28
										C24G7.1	delm-2
										R06B10.3	clec-150
										T25G12.6	T25G12.6
										Y34F4.4	Y34F4.4
										F55G11.8	F55G11.8
										F32B6.5	sss-1
										T20D3.2	T20D3.2
										F56F10.1	F56F10.1
										C01B10.6	C01B10.6
										F54D5.4	F54D5.4
										F01D5.5	F01D5.5
										F01D4.2	ugt-44
										C17G10.5	lys-8
										F13D12.6	ctsa-1.2
										F11D11.3	F11D11.3
										H20E11.1	H20E11.1
										W07A12.6	oac-54
										T07H3.2	bath-46
										F38A5.3	lec-11
										Y43C5A.2	Y43C5A.2
										Y46D2A.2	Y46D2A.2
										F53B2.8	F53B2.8
										Y47H9C.1	Y47H9C.1
										W04E12.8	clec-50
										F23F12.3	F23F12.3
										C04G2.9	C04G2.9
										R09D1.10	chil-22
										T25C12.4	spp-21
										Y75B8A.39	Y75B8A.39
										F13B6.2	F13B6.2
										F19C7.2	F19C7.2
										F58F9.4	F58F9.4
										Y22F5A.5	lys-2
										F49H6.13	F49H6.13
										Y49E10.18	Y49E10.18
										C54D1.2	clec-86
										C17F4.7	C17F4.7
										Y41D4B.15	Y41D4B.15
										F49F1.5	F49F1.5
										C14C6.2	C14C6.2
										R08E3.1	R08E3.1
										Y105C5B.15	Y105C5B.15
										F22E5.1	F22E5.1
										Y54G2A.39	clec-80
										R03G8.3	R03G8.3
										C17H12.6	C17H12.6
										B0554.6	dod-20
										F35C5.8	clec-65
										Y102A5B.2	clec-35
										F10A3.2	fbxa-88
										F55G11.5	dod-22
										C13D9.9	ugt-7
										Y51H7BM.1	math-45
										F33H12.5	sri-36
										Y55B1AR.1	lec-6
										F55G11.4	F55G11.4
										F35E12.8	cld-9
										C04F12.7	C04F12.7
										T10E9.4	T10E9.4
										F10A3.3	fbxa-18
										F49F1.1	drd-50
										F56D6.2	clec-67
										T12B5.10	fbxa-60
										F16H6.1	clec-42
										F09G8.8	clec-160
										F19C7.4	F19C7.4
										C49C3.4	C49C3.4
										W01A11.4	lec-10
										F54D5.3	F54D5.3
										Y46C8AL.4	clec-71
										C33C12.3	gba-1
										F32A7.7	str-245
										EGAP2.3	pho-1
										C48B4.1	acox-1.5
										Y69E1A.1	Y69E1A.1
										C49G7.7	C49G7.7
										T20B3.12	clec-26
										F48C1.7	spe-11
										F32H5.1	F32H5.1
										F19H8.5	mltn-10
										Y119D3B.13	Y119D3B.13
										T06E6.3	fbxa-199
										C30F12.1	rege-1
										F09F7.5	F09F7.5
										F56C9.7	F56C9.7
										Y54G2A.49	Y54G2A.49
										F07C6.2	F07C6.2
										Y102A5B.3	clec-37
										Y46C8AL.2	clec-174
										F48C1.1	aman-3
										F21F8.11	slc-17.5
										T28H10.3	T28H10.3
										W06B3.2	sma-5
										Y4C6B.6	gba-4
										T12B5.2	fbxa-54
										T20B3.16	clec-36
										Y34B4A.9	Y34B4A.9
										K08E7.7	cul-6
										C18E9.5	C18E9.5
										Y32F6A.4	Y32F6A.4
										F48F7.7	arrd-24
										Y54E5A.1	ttm-5
										F38A1.4	clec-167
										C44H9.6	C44H9.6
										Y102A5B.1	clec-27
										Y57G11A.2	Y57G11A.2
										F21D5.3	F21D5.3
										D1037.3	ftn-2
										C26B9.5	C26B9.5
										F49A5.4	clec-24
										T28D6.2	tba-7
										C15C8.3	hrg-7
										F39E9.11	btb-17
										C39H7.4	C39H7.4
										K10G4.5	K10G4.5
										T06E6.5	fbxa-135
										M28.9	M28.9
										W01C8.5	W01C8.5
										F46G10.4	F46G10.4
										Y34B4A.5	Y34B4A.5
										W03B1.2	trpl-2
										C13D9.1	srr-6
										T27C10.4	bath-25
										W05E10.4	tre-3
										F55F3.2	F55F3.2
										F17E9.5	F17E9.5
										Y53G8AR.7	Y53G8AR.7
										T05C3.6	T05C3.6
										W02B12.1	W02B12.1
										Y17G7B.11	arrd-7
										B0244.10	B0244.10
										T21B6.2	pho-7
										C05B5.5	C05B5.5
										Y43F8A.2	Y43F8A.2
										C05E11.5	amt-4
										C49A9.4	C49A9.4
										T01D3.6	T01D3.6
										H22K11.1	asp-3
										C54D10.1	cdr-2
										T25E12.13	srz-99
										F54F11.2	nep-17
										R11D1.11	dhs-21
										F39E9.2	btb-16
										F49A5.5	clec-28
										T07H3.6	bath-26
										K10D11.1	dod-17
										D2096.3	aagr-1
										F45E4.1	arf-1.1
										Y51F10.7	Y51F10.7
										F19C7.1	F19C7.1
										F47B8.4	F47B8.4
										Y71G12B.32	Y71G12B.32
										T25E12.12	fbxa-127
										F55G11.2	F55G11.2
										C31B8.7	C31B8.7
										C12D12.1	C12D12.1
										F08H9.8	clec-54
										Y34B4A.6	Y34B4A.6
										F01D5.2	F01D5.2
										C16C4.5	math-15

## Sheet: nhr-14(tm1473 upregulated genes
Genes upregulated in the RNA-seq dataset of nhr-14(tm1473)mutants with log fold change < 1
Gene ID	Gene name
C32H11.10	dod-21
F26A1.8	F26A1.8
T01B10.4	nhr-14
Y69A2AR.4	smf-3
C02F5.11	tsp-2
Y47H10A.5	Y47H10A.5
C02F5.8	tsp-1
T19C9.8	T19C9.8
C49C3.9	C49C3.9
B0024.4	B0024.4
F49E12.2	dod-23
C32H11.12	dod-24
Y37H2A.14	Y37H2A.14
Y39B6A.24	asp-17
ZK6.10	dod-19
B0365.6	clec-41
C14C6.5	C14C6.5
C02A12.4	lys-7
F33H12.7	F33H12.7
T27D12.6	T27D12.6
F54E2.1	F54E2.1
K08D8.6	K08D8.6
F15B9.6	F15B9.6
F09B9.1	oac-14
F56A6.1	sago-2
F44G3.10	F44G3.10
C24G7.2	acd-1
K10D11.5	K10D11.5
T27F2.4	zip-10
F25E2.4	ifd-2
R07B1.10	lec-8
Y54G2A.6	clec-85
Y51H4A.25	Y51H4A.25
T10H4.12	cpr-3
T24C4.4	T24C4.4
ZK6.11	ZK6.11
ZK1251.2	ins-7
C18H9.6	C18H9.6
R10D12.9	swt-6
E04D5.4	E04D5.4
H34I24.2	H34I24.2
M02H5.8	M02H5.8
F47H4.10	skr-5
C09F12.1	clc-1
T05B11.3	clic-1
F36G9.12	oac-20
F27C8.4	spp-18
K06G5.1	K06G5.1
C32H11.9	C32H11.9
F21H7.1	gst-22
F27E5.9	F27E5.9
F53F1.6	F53F1.6
C54D10.7	pals-39
Y41D4B.16	hpo-6
B0496.7	valv-1
K10D11.3	K10D11.3
C35D10.14	clec-5
C17H12.8	C17H12.8
R13H4.3	pho-8
T26H5.9	T26H5.9
Y39D8A.1	Y39D8A.1
Y22F5A.4	lys-1
F20G2.5	F20G2.5
C54D10.14	pals-37
F35E12.9	F35E12.9
F01G10.3	ech-9
F20D6.11	F20D6.11
C34B7.3	cyp-36A1
F35C5.5	clec-62
F11A5.9	F11A5.9
F28B4.3	F28B4.3
Y40D12A.2	ctsa-2
C31A11.5	oac-6
ZK20.1	ghi-1
F01D5.3	F01D5.3
F35C5.6	clec-63
C16D9.4	C16D9.4
T26C12.6	clec-173
F01D5.1	F01D5.1
K12H4.7	K12H4.7
F53C11.1	F53C11.1
F27E5.1	asah-2
F53A9.2	kreg-1
M04D5.3	M04D5.3
M28.10	M28.10
F58E6.7	hrg-3
C08E3.10	fbxa-158
F09C8.1	F09C8.1
C29F9.3	pals-23
Y26D4A.3	Y26D4A.3
C08E8.4	C08E8.4
F52E1.14	F52E1.14
K10B2.2	ctsa-1
T19D12.5	T19D12.5
K04H4.6	crn-6
F25A2.1	F25A2.1
K10D11.6	K10D11.6
K11H12.4	K11H12.4
R02D5.3	R02D5.3
F35E8.8	gst-38
T19D12.4	T19D12.4
F44D12.5	msd-2
C54D10.13	C54D10.13
W03D2.6	W03D2.6
C29F9.4	pals-24
Y46G5A.20	Y46G5A.20
C28G1.5	C28G1.5
C34H4.2	C34H4.2
W02G9.4	W02G9.4
W02A2.9	W02A2.9
Y68A4A.13	Y68A4A.13
F35E12.7	dct-17
C34D1.5	zip-5
W09G12.7	W09G12.7
Y40B10A.2	comt-3
T24B8.5	T24B8.5
Y69A2AL.2	Y69A2AL.2
C44B7.8	pmp-1
ZK484.5	msrp-2
R09E10.6	R09E10.6
T28H11.5	ssq-2
R09D1.11	chil-23
C06B8.2	C06B8.2
Y75B8A.28	Y75B8A.28
C24G7.1	delm-2
R06B10.3	clec-150
T25G12.6	T25G12.6
F40F9.2	tag-120
Y34F4.4	Y34F4.4
F55G11.8	F55G11.8
C48E7.7	C48E7.7
ZK1251.6	msp-76
F32B6.5	sss-1
T20D3.2	T20D3.2
ZK896.5	ZK896.5
F56F10.1	F56F10.1
Y37E3.16	fpn-1.1
C01B10.6	C01B10.6
F54D5.4	F54D5.4
F01D5.5	F01D5.5
E03H12.10	ssp-9
R52.9	math-37
F01D4.2	ugt-44
C17G10.5	lys-8
K08H2.5	K08H2.5
M03A1.3	M03A1.3
T24D3.2	T24D3.2
F32B6.6	msp-77
ZK546.6	msp-152
F09F9.3	F09F9.3
F13D12.6	F13D12.6
F44D12.4	gipc-2
ZK856.5	ZK856.5
C35D10.2	gipc-1
F41F3.4	col-139
F44D12.7	msd-3
F14H3.12	F14H3.12
M18.1	col-129
F11D11.3	F11D11.3
H20E11.1	H20E11.1
W07A12.6	oac-54
K08F9.1	K08F9.1
F22B8.1	srj-29
T07H3.2	bath-46
C33F10.1	C33F10.1
F38A5.3	lec-11
F54C9.3	F54C9.3
ZK896.1	ZK896.1
Y43C5A.2	Y43C5A.2
R07C12.1	R07C12.1
ZK484.8	nspd-1
K01D12.14	hrg-2
T26H5.14	T26H5.14
Y46D2A.2	Y46D2A.2
F53B2.8	F53B2.8
K08D10.14	K08D10.14
ZK1320.2	ZK1320.2
F38A3.1	col-81
Y47H9C.1	Y47H9C.1
F56A4.2	F56A4.2
ZK896.4	ZK896.4
C31B8.4	pals-32
ZK455.4	asm-2
W04E12.8	clec-50
F23F12.3	F23F12.3
F55C12.7	tag-234
C08E3.7	fbxa-164
C04G2.9	C04G2.9
R09D1.10	chil-22
T25C12.4	spp-21
C10G11.8	C10G11.8
F57B9.3	F57B9.3
Y42H9AR.5	Y42H9AR.5
ZK1290.10	ZK1290.10
Y75B8A.39	Y75B8A.39
F13B6.2	F13B6.2
K06A5.2	K06A5.2
F19C7.2	F19C7.2
F26B1.8	F26B1.8
C35D10.11	msd-4
W03D8.9	W03D8.9
F58F9.4	F58F9.4
Y22F5A.5	lys-2
T27D12.2	clh-1
ZK520.2	Multiple entries : 2
F49H6.13	F49H6.13
N.A.	not found
K07F5.1	msp-81
M176.1	arrd-3
C33F10.9	msp-40
Y49E10.18	Y49E10.18
C54D1.2	clec-86
T06C12.10	cgt-1
ZK354.10	msp-58
Y37E11B.7	Y37E11B.7
C46F9.1	math-22
R11G11.7	pqn-60
C17F4.7	C17F4.7
K07F5.5	nspd-2
Y41D4B.15	Y41D4B.15
C06E4.8	C06E4.8
F49F1.5	F49F1.5
C14C6.2	C14C6.2
ZK938.1	ZK938.1
F46G10.1	F46G10.1
Y22D7AL.15	Y22D7AL.15
ZK354.4	msp-113
T13F2.10	msp-79
Y38C1AA.7	Y38C1AA.7
R08E3.1	R08E3.1
Y75B8A.27	pqn-92
ZC239.22	ZC239.22
C49G7.12	C49G7.12
T22G5.2	lbp-7
Y105C5B.15	Y105C5B.15
R10E9.2	R10E9.2
F22E5.1	F22E5.1
K07F5.2	msp-10
T13F2.11	msp-78
T07H8.5	srg-31
C31H5.6	C31H5.6
C23H4.6	C23H4.6
Y54G2A.39	clec-80
F52B11.4	col-133
B0491.3	rmd-3
C34F11.4	msp-50
F41H10.1	F41H10.1
B0563.10	B0563.10
R03G8.3	R03G8.3
C34F11.6	msp-49
K11D2.2	asah-1
ZK354.11	msp-59
C17H12.6	C17H12.6
F40E3.5	F40E3.5
Y47H10A.3	Y47H10A.3
B0554.6	dod-20
F08G2.5	F08G2.5
F35C5.8	clec-65
Y102A5B.2	clec-35
R05F9.8	msp-33
F10A3.2	fbxa-88
R01E6.3	cah-4
C52A10.1	C52A10.1
F55G11.5	dod-22
C15A11.6	col-62
C13D9.9	ugt-7
F28D1.5	thn-2
F58F9.3	F58F9.3
ZK945.7	ZK945.7
Y51H7BM.1	math-45
C45B2.1	C45B2.1
T07H3.1	bath-47
T08B2.12	T08B2.12
F33H12.5	sri-36
W02D3.7	lbp-5
F11G11.8	nspd-5
F08B4.8	F08B4.8
K08F4.8	msp-38
Y55B1AR.1	lec-6
K10G6.5	K10G6.5
F55G11.4	F55G11.4
F35E12.8	cld-9
C04F12.7	C04F12.7
C54D10.12	pals-36
B0244.4	B0244.4
T10E9.4	T10E9.4
C06C6.4	nhr-63
F10A3.3	fbxa-18
C09B9.6	msp-55
T26H5.10	T26H5.10
F49F1.1	drd-50
F56D6.2	clec-67
C23G10.11	C23G10.11
C51E3.10	C51E3.10
F08H9.2	F08H9.2
ZC477.1	ssq-3
T27E7.1	T27E7.1
B0462.5	B0462.5
T12B5.10	fbxa-60
F16H6.1	clec-42
F09G8.8	clec-160
F19C7.4	F19C7.4
ZK265.2	col-63
C49C3.4	C49C3.4
ZC443.5	ugt-18
F57G4.11	F57G4.11
ZC47.4	fbxa-30
W09C3.6	gsp-3
W01A11.4	lec-10
F54D5.3	F54D5.3
Y22F5A.6	lys-3
Y46C8AL.4	clec-71
C33C12.3	gba-1
C41G7.8	C41G7.8
F32A7.7	str-245
Y69E1A.2	Y69E1A.2
EGAP2.3	pho-1
Y54G2A.7	Y54G2A.7
C48B4.1	acox-1.5
ZC416.4	kgb-2
C06C6.5	nhr-50
Y69E1A.1	Y69E1A.1
F47D12.6	F47D12.6
C24D10.7	nspd-3
C49G7.7	C49G7.7
T20B3.12	clec-26
F48C1.7	spe-11
R13H9.6	R13H9.6
F58A6.8	msp-45
F32H5.1	F32H5.1
ZC204.12	ZC204.12
F19H8.5	mltn-10
C35B8.1	col-175
Y47D3A.32	Y47D3A.32
Y119D3B.13	Y119D3B.13
F58E1.6	nhx-6
C07G3.2	irg-1
AC3.7	ugt-1
F07C6.6	F07C6.6
F32H2.7	F32H2.7
R05F9.13	msp-31
F49C12.15	F49C12.15
C04G2.4	msp-36
E03H4.10	clec-17
C39H7.1	C39H7.1
T06E6.3	fbxa-199
B0244.5	B0244.5
C30F12.1	rege-1
F09F7.5	F09F7.5
Y38E10A.15	nspe-7
F56C9.7	F56C9.7
ZK1248.6	msp-64
K09H9.3	col-49
Y54G2A.49	Y54G2A.49
T08E11.1	T08E11.1
F14H12.3	F14H12.3
F07C6.2	F07C6.2
T28H11.1	ssq-4
W06G6.1	oac-53
C28C12.5	spp-8
B0348.2	B0348.2
Y102A5B.3	clec-37
B0244.6	B0244.6
Y46C8AL.2	clec-174
F48C1.1	aman-3
C45G9.9	C45G9.9
F18A12.4	nep-8
F21F8.11	slc-17.5
F36H12.7	msp-19
T28H10.3	T28H10.3
F22B5.3	cut-3
F28G4.1	cyp-37B1
M01G12.9	M01G12.9
ZC168.6	ssp-34
W07B8.4	W07B8.4
W06B3.2	sma-5
C07D10.5	C07D10.5
Y4C6B.6	gba-4
T27C10.7	nspd-10
T12B5.2	fbxa-54
T20B3.16	clec-36
C33F10.11	C33F10.11
Y34B4A.9	Y34B4A.9
F19B10.13	F19B10.13
T10D4.13	ins-19
F55C5.1	ssp-35
C15A11.7	C15A11.7
K08E7.7	cul-6
T12B3.2	T12B3.2
F15A8.6	F15A8.6
F08D12.2	F08D12.2
C29F4.2	best-7
C18E9.5	C18E9.5
Y32F6A.4	Y32F6A.4
F49E12.10	F49E12.10
T05E12.3	T05E12.3
C15C6.2	C15C6.2
T06E6.15	T06E6.15
K03H1.1	gln-2
F48F7.7	arrd-24
Y60A3A.18	skr-4
Y54E5A.1	ttm-5
M70.1	M70.1
C02F5.5	C02F5.5
F38A1.4	clec-167
K03H1.10	cbp-2
F21C10.8	pqn-31
D2062.6	msrp-6
T26H5.4	T26H5.4
C40D2.2	math-20
C44H9.6	C44H9.6
C50F4.1	C50F4.1
F26A1.3	F26A1.3
Y102A5B.1	clec-27
Y57G11A.2	Y57G11A.2
T05A7.6	T05A7.6
F21D5.3	F21D5.3
C55C3.8	C55C3.8
D1037.3	ftn-2
F47C12.4	clec-79
Y37A1A.2	Y37A1A.2
F09G2.3	pitr-5
Y43C5A.1	nspd-7
ZK265.3	ZK265.3
C26B9.5	C26B9.5
R13H9.1	rmd-6
C17F3.1	C17F3.1
Y14H12A.2	Y14H12A.2
H23N18.6	H23N18.6
F49A5.4	clec-24
ZK1307.4	ZK1307.4
W02B12.12	W02B12.12
C16C4.4	math-14
T28D6.2	tba-7
C15C8.3	hrg-7
R13H9.2	msp-57
K05F1.2	msp-142
F39E9.11	btb-17
F32B5.4	msrp-1
T22H6.5	abf-5
C39H7.4	C39H7.4
K10G4.5	K10G4.5
R09E10.3	acs-18
R07H5.10	zip-6
T07H3.3	math-38
R08A2.3	ssp-33
E02H9.5	klo-2
T06E6.5	fbxa-135
M28.9	M28.9
ZK354.5	msp-51
F57C12.2	F57C12.2
W01C8.5	W01C8.5
ZC239.14	ZC239.14
F46G10.4	F46G10.4
Y34B4A.5	Y34B4A.5
T04H1.9	tbb-6
F49A5.7	clec-33
ZC443.6	ugt-16
ZC116.2	cyc-2.2
T23B3.5	T23B3.5
Y119D3B.21	Y119D3B.21
W03B1.2	trpl-2
T25C12.2	spp-9
Y59E9AL.3	Y59E9AL.3
C13D9.1	srr-6
F58E6.5	F58E6.5
C10C5.2	C10C5.2
Y66D12A.13	Y66D12A.13
T27C10.4	bath-25
Y47D7A.6	Y47D7A.6
W05E10.4	tre-3
F55F3.2	F55F3.2
F17E9.5	F17E9.5
F27C1.1	F27C1.1
F59F3.4	del-5
Y53G8AR.7	Y53G8AR.7
T05C3.6	T05C3.6
W02B12.1	W02B12.1
Y17G7B.11	arrd-7
T27D12.3	clec-144
Y57A10A.11	rol-1
B0244.10	B0244.10
T21B6.2	pho-7
H12D21.1	nspa-1
C49G7.3	C49G7.3
F49H6.3	F49H6.3
K01D12.15	K01D12.15
Y47D3A.13	Y47D3A.13
C05B5.5	C05B5.5
F01D5.8	F01D5.8
C14C10.1	C14C10.1
Y43F8A.2	Y43F8A.2
T03F1.5	gsp-4
F26G1.7	msp-3
K05F1.3	acdh-8
Y113G7C.1	Y113G7C.1
C05E11.5	amt-4
Y38E10A.17	Y38E10A.17
C49A9.4	C49A9.4
T01D3.6	T01D3.6
T16D1.2	pho-4
T27A3.3	ssp-16
B0218.7	B0218.7
H22K11.1	asp-3
C54D10.1	cdr-2
T25E12.13	srz-99
Y59H11AM.2	mpst-5
ZK354.1	msp-65
F14H12.1	col-165
T23B7.1	nspd-4
T08E11.2	math-39
EGAP9.2	fut-2
K04E7.2	pept-1
C08E8.3	C08E8.3
H06H21.9	mpz-4
F54F11.2	nep-17
K07F5.3	msp-56
R11D1.11	dhs-21
R13H9.5	R13H9.5
T05B11.6	srr-10
F39E9.2	btb-16
F49A5.5	clec-28
T07H3.6	bath-26
K10D11.1	dod-17
F10C2.3	F10C2.3
Y47D7A.15	Y47D7A.15
D1081.12	D1081.12
C28D4.5	C28D4.5
C08E3.9	fbxa-166
T05H10.3	T05H10.3
D2096.3	aagr-1
F45E4.1	arf-1.1
C33D12.3	twk-26
C10G11.9	spch-2
Y82E9BR.4	pals-16
Y51F10.7	Y51F10.7
F36D3.5	F36D3.5
F19C7.1	F19C7.1
C30F12.6	trhr-1
F39G3.5	F39G3.5
F47B8.4	F47B8.4
F14D7.7	F14D7.7
ZK550.5	ZK550.5
F27C8.5	F27C8.5
ZK1193.2	ZK1193.2
ZK1055.7	ZK1055.7
F10G2.3	clec-7
Y71G12B.32	Y71G12B.32
Y6G8.5	Y6G8.5
T25E12.12	fbxa-127
F55G11.2	F55G11.2
C31B8.7	C31B8.7
C12D12.1	C12D12.1
R03H10.6	R03H10.6
B0496.8	tes-1
C52D10.13	col-138
F21H7.5	F21H7.5
C08F8.6	C08F8.6
C04G2.8	spch-1
F08H9.8	clec-54
Y34B4A.6	Y34B4A.6
R07B5.3	sru-40
Y46G5A.30	snf-5
H06H21.10	tat-2
H12D21.14	nspa-6
F59E11.10	nhr-195
Y9C9A.8	Y9C9A.8
C07G1.6	C07G1.6
F01D5.2	F01D5.2
C16C4.5	math-15
Multiple Output Below
ZK520.2	sid-2
ZK520.2	ZK520.2

## Sheet: Shapira et al., 2006
Gene list from Shapira et al., 2006 obtained upon PA14 exposure used for comparison with upregulated nhr-14(tm1473) genes at log fold change > 1
Gene ID	Gene name
Y22F5A.4	lys-1
Y22F5A.5	lys-2
B0365.6	clec-41
C16H3.2	lec-9
C54D1.2	clec-86
F35C5.5	clec-62
F35C5.9	clec-66
F38A5.3	lec-11
F56D6.1	clec-68
F56D6.2	clec-67
R07B1.10	lec-8
ZK896.6	clec-187
ZK896.7	clec-186
C17H12.6	C17H12.6
C29F3.7	C29F3.7
C32H11.12	dod-24
C32H11.4	C32H11.4
F08G5.6	irg-4
F20G2.5	F20G2.5
F35E12.6	F35E12.6
F35E12.7	dct-17
F35E12.8	cld-9
F55G11.2	F55G11.2
F55G11.5	dod-22
F55G11.7	F55G11.7
F55G11.8	F55G11.8
H20E11.3	H20E11.3
K08D8.4	K08D8.4
K08D8.5	K08D8.5
K10D11.1	dod-17
C34H4.1	C34H4.1
C34H4.2	C34H4.2
C34H4.3	Multiple entries : 2
F11D11.3	F11D11.3
F54E2.1	F54E2.1
Y41D4B.16	hpo-6
Y41D4B.17	Y41D4B.17
ZK6.10	dod-19
ZK6.11	ZK6.11
B0035.8	his-48
F08G2.1	his-44
F08G2.2	his-43
ZK131.10	his-16
ZK131.4	his-10
ZK131.5	his-11
ZK131.9	his-15
D1053.1	gst-42
F11G11.2	gst-7
F11G11.3	gst-6
F21H7.1	gst-22
F26E4.12	gpx-1
F35E8.8	gst-38
F37B1.1	gst-24
R03D7.6	gst-5
R107.7	gst-1
T26C5.1	gst-13
B0496.7	valv-1
K01D12.11	cdr-4
K01D12.12	cdr-6
C02H6.2	fbxa-105
F01D5.1	F01D5.1
F01D5.3	F01D5.3
T24B8.5	T24B8.5
F49F1.1	drd-50
F20G2.2	F20G2.2
F42F12.3	F42F12.3
F53C11.3	F53C11.3
C55A6.7	C55A6.7
F01D4.2	ugt-44
Y39G10AR.6	ugt-31
Y49C4A.8	ugt-29
F27C8.4	spp-18
T08A9.7	spp-3
F29G9.4	Multiple entries : 2
F34D6.4	set-11
F40F8.7	pqm-1
T27F2.4	zip-10
Y70C5C.6	nhr-112
T05B4.2	nhr-57
T27B7.4	nhr-115
T10H4.12	cpr-3
C26B9.5	C26B9.5
F21F8.4	asp-12
F56F10.1	F56F10.1
K10C2.3	asp-14
K12H4.7	K12H4.7
C49G7.10	C49G7.10
F39G3.5	F39G3.5
K07C6.5	cyp-35A5
C09F12.1	clc-1
C17C3.4	ins-11
C35C5.4	mig-2
C47B2.8	prx-11
CD4.2	crn-2
F44G3.6	skr-3
F46G10.7	sir-2.2
F55A12.7	apm-1
K07E3.8	vem-1
T22C8.8	vab-9
T28D6.2	tba-7
W03D2.5	wrt-5
Y46H3A.3	hsp-16.2
ZK1321.3	aqp-10
C29F9.3	pals-23
F52F10.3	oac-31
K02D7.1	K02D7.1
K05F1.10	K05F1.10
K10C2.4	fah-1
Y25C1A.13	Y25C1A.13
Y32B12A.3	comt-2
Y32F6B.3	crp-1
Y37D8A.6	Y37D8A.6
Y40B10A.2	comt-3
Y55F3AM.10	abhd-14
ZK1058.6	nit-1
ZK1127.10	cth-2
ZK1320.1	gstk-1
ZK1320.2	ZK1320.2
ZK228.4	ZK228.4
C18E9.9	C18E9.9
C25D7.5	C25D7.5
C12D12.5	sox-4
C33H5.13	C33H5.13
C34C12.5	rsu-1
C07A9.8	best-5
C39H7.4	C39H7.4
C42D8.1	C42D8.1
C09F5.2	orai-1
C47E12.4	pyp-1
C49C3.9	C49C3.9
C49C8.5	C49C8.5
C06B3.7	C06B3.7
C49G7.5	irg-2
C10C5.2	C10C5.2
D2007.1	D2007.1
D2045.8	D2045.8
F01D5.5	F01D5.5
F08F3.4	F08F3.4
F08G2.5	F08G2.5
F13A7.11	F13A7.11
F16H6.10	F16H6.10
F18G5.6	F18G5.6
F18H3.4	F18H3.4
F19B2.5	F19B2.5
F19C7.1	F19C7.1
F20C5.4	F20C5.4
F22H10.2	F22H10.2
C14C6.5	C14C6.5
F31F7.1	F31F7.1
C15C7.5	C15C7.5
C07G3.2	irg-1
F40A3.1	F40A3.1
F40F12.7	cbp-3
F41C3.8	F41C3.8
F44G3.10	F44G3.10
F47B8.4	F47B8.4
F52E1.5	F52E1.5
F53A9.6	F53A9.6
F53E10.4	irg-3
F54B8.4	F54B8.4
F54D5.4	F54D5.4
F54H5.4	klf-3
F56C9.7	F56C9.7
F56D2.5	F56D2.5
F58G1.4	dct-18
F59B1.8	F59B1.8
H06I04.6	H06I04.6
H43E16.1	H43E16.1
K04A8.1	K04A8.1
K09D9.1	K09D9.1
K11D12.5	swt-7
M04C3.2	M04C3.2
M60.1	M60.1
PDB1.1	PDB1.1
R12E2.13	R12E2.13
T01D3.6	T01D3.6
T12B5.10	fbxa-60
T12B5.8	fbxa-59
T19D12.4	T19D12.4
T20D3.2	T20D3.2
T21F4.1	T21F4.1
T24C4.4	T24C4.4
T25D10.1	T25D10.1
Y113G7B.1	fbxa-116
Y119D3B.18	fbxa-91
Y17G7B.8	Y17G7B.8
Y22D7AR.9	fbxa-74
Y38H6C.11	fbxa-150
Y41C4A.8	Y41C4A.8
Y43F8B.2	Y43F8B.2
Y82E9BL.10	fbxa-14
Y82E9BL.11	fbxa-15
ZC47.4	fbxa-30
ZC47.7	fbxa-151
ZK1055.7	ZK1055.7
ZK637.13	glb-1
Multiple Output Below
C34H4.3	C34H4.3
C34H4.3	tag-244
F29G9.4	fos-1
F29G9.4	F29G9.4

## Sheet: Troemel et al., 2006
Gene list from Troemel et al., 2006 obtained upon PA14 exposure used for the comparison with upregulated nhr-14(tm1473 genes at log fold change > 1
Gene ID	Gene name
C07G3.2	irg-1
Y58A7A.5	Y58A7A.5
T24C4.4	T24C4.4
Y51B9A.8	Y51B9A.8
F53E10.4	irg-3
F49H6.13	F49H6.13
ZC443.6	ugt-16
Y22D7AR.9	fbxa-74
C05A9.1	pgp-5
Y38E10A.5	clec-4
C29F7.2	C29F7.2
C06B3.7	C06B3.7
F55G11.2	F55G11.2
C32H11.1	irg-6
K11D12.4	cpt-4
C17H12.6	C17H12.6
C49G7.5	irg-2
T19D12.4	T19D12.4
T05F1.9	T05F1.9
T16G1.5	T16G1.5
C49G7.7	C49G7.7
F49F1.6	mul-1
F35E12.4	F35E12.4
F54B8.4	F54B8.4
F52F10.4	oac-32
F35E8.8	gst-38
Y46C8AL.8	clec-74
H02F09.3	H02F09.3
M60.2	endu-2
C10C5.2	C10C5.2
F52F10.3	oac-31
Y47D3A.2	fbxa-128
F08G5.6	irg-4
Y39G10AR.6	ugt-31
F08G2.5	F08G2.5
C04G6.5	C04G6.5
R08F11.3	cyp-33C8
C41H7.7	clec-3
K09D9.1	K09D9.1
F53A9.6	F53A9.6
Y94H6A.2	Y94H6A.2
K11H12.3	K11H12.3
F53A9.1	F53A9.1
F55G11.5	dod-22
Y22F5A.6	lys-3
F53A9.2	kreg-1
M02F4.7	clec-265
AC3.7	ugt-1
B0454.7	clec-2
///	not found
C34H4.1	C34H4.1
F20G2.5	F20G2.5
F55C12.7	tag-234
H20E11.3	H20E11.3
F25A2.1	F25A2.1
F09B9.1	oac-14
T21E8.1	pgp-6
T21E8.2	pgp-7
F01G10.3	ech-9
K08D8.4	K08D8.4
B0024.4	B0024.4
K11H12.4	K11H12.4
C38H2.2	C38H2.2
Y46E12A.1	cnc-6
T19D12.3	T19D12.3
F11A5.12	stdh-2
F35E12.8	cld-9
H43E16.1	H43E16.1
Y119D3B.18	fbxa-91
Y119D3B.20	fbxa-92
C02F5.8	tsp-1
C23G10.11	C23G10.11
Y47H10A.5	Y47H10A.5
T25B9.7	ugt-54
K10D11.1	dod-17
F53B2.8	F53B2.8
F14B8.7	otpl-3
F07C4.2	clec-45
F07C4.9	clec-46
F22H10.2	F22H10.2
Y49C4A.8	ugt-29
M28.8	M28.8
C50F7.5	C50F7.5
C48D5.1	nhr-6
F35C5.9	clec-66
Y40B10A.6	comt-4
C18A11.1	C18A11.1
K05B2.4	K05B2.4
ZK131.9	his-15
ZK131.5	his-11
F08G2.1	his-44
B0496.7	valv-1
Y17D7B.3	Y17D7B.3
E02C12.8	E02C12.8
Y22D7AL.15	Y22D7AL.15
C10H11.6	ugt-26
T10B9.2	cyp-13A5
C50F7.5	C50F7.5
Y46C8AL.2	clec-174
F13G3.2	srd-53
C49G7.10	C49G7.10
T01D3.6	T01D3.6
F11G11.3	gst-6
F45D3.4	F45D3.4
Y41D4B.18	Y41D4B.18
C01G6.7	acs-7
F35E12.9	F35E12.9
F56D6.2 /// F56D6.1	clec-67//clec-68
Y58A7A.4	Y58A7A.4
Y46C8AL.4	clec-71
K08D8.6	K08D8.6
D1086.5	D1086.5
F58G6.4	acc-1
C32H11.12	dod-24
C31A11.5	oac-6
T10H4.12	cpr-3
C50F4.9	C50F4.9
T10H4.12	cpr-3
F11D11.3 /// F11D11.4	F11D11.3 /// F11D11.4
F21E9.3	ttr-37
Y46C8AL.2	clec-174
K08D8.6	K08D8.6
Y52E8A.3	Y52E8A.3
F55C12.7	tag-234
B0213.15	cyp-34A9
F55G11.6	F55G11.6
K01D12.11	cdr-4
F28F8.2	acs-2
F55G11.3	F55G11.3
ZK131.4 /// ZK131.1 /// ZK131.8	his-10/not found
Y82E9BL.10	fbxa-14
C50F7.5	C50F7.5
Y75B8A.28	Y75B8A.28
Y59E9AR.4 /// Y59E9AR.6	thn-5/// thn-7
F45D3.4	F45D3.4
Y41D4B.16	hpo-6
C38D9.9	fbxa-176
Y70C5C.6	nhr-112
F46B3.1	F46B3.1
F14H3.10	cyp-35D1
F55G11.8	F55G11.8
F02C12.5	cyp-13B1
C32H11.3	C32H11.3
T04F8.7	T04F8.7
Y94H6A.7	Y94H6A.7
F56D6.2	clec-67
F08F3.7	cyp-14A5
F56C3.2	fbxa-190
W06G6.11	W06G6.11
K08D8.6	K08D8.6
K01A2.2	far-7
Y43F8B.14	Y43F8B.14
ZC443.3	ZC443.3
F14F9.4	F14F9.4
K09C4.1	K09C4.1
C49C8.5	C49C8.5
CD4.2	crn-2
M05D6.7	gbh-2
F35E8.11	cdr-1
F35E12.5	irg-5
C07E3.3	C07E3.3
F07C4.2	clec-45
Y47G6A.5	Y47G6A.5
T27F2.4	zip-10
C32H11.4	C32H11.4
C49C3.9	C49C3.9
C17C3.4	ins-11
C01B7.4	magu-2
Y43C5A.3	Y43C5A.3
F16H6.10	F16H6.10
Y54G2A.14	clec-83
T25D10.4	T25D10.4
F25E2.4	ifd-2
C54D1.2	clec-86
M01G12.9	M01G12.9
F56D2.5	F56D2.5
Y58A7A.3	Y58A7A.3
ZC239.12	sdz-35
ZK970.7	ZK970.7
F21F8.4	asp-12
Y50E8A.16	haf-7
Y75B12B.6	plc-2
ZK896.4	ZK896.4
F28F8.2	acs-2
C34C6.7	cup-16
Y17G7B.8	Y17G7B.8
Y17G7B.14	arrd-8
ZC443.5	ugt-18
K05F1.10	K05F1.10
H02F09.2	H02F09.2
Y46H3A.3	hsp-16.2
W03F8.8	W03F8.8
C02F5.11	tsp-2
F53A9.8	F53A9.8
F47H4.10	skr-5
F19B2.5	F19B2.5
C39H7.4	C39H7.4
K10D11.5	K10D11.5
F21A3.1	srh-276
F13A7.11	F13A7.11
C50F4.1	C50F4.1
F35E12.7	dct-17
C15A11.7	C15A11.7
C37H5.4	cwp-3
C17H12.8	C17H12.8
C02H6.2	fbxa-105
F16C3.2	F16C3.2
F38A5.3	lec-11
K08D8.5	K08D8.5
Y119C1B.3	Y119C1B.3
C29F9.3	pals-23
K11D12.5	swt-7
K10C2.3	asp-14
K08E7.7	cul-6
C18H9.6	C18H9.6
C13D9.1	srr-6
C16D9.4	C16D9.4
K10B2.2	ctsa-1
T05C12.1	T05C12.1
C04G6.1	mpk-2
Y46D2A.2	Y46D2A.2
Y46H3A.2	hsp-16.41
F59E11.1	srx-1
C09F12.1	clc-1
C25D7.5	C25D7.5
Y60C6A.1	Y60C6A.1
T24H7.5	tat-4
F41G4.8	F41G4.8
Y40C7B.1	Y40C7B.1
C37H5.1	nex-4
C34H4.3	tag-244
Y17D7B.2	Y17D7B.2
C55F2.2	ilys-4
F35E12.6	F35E12.6
ZK1290.10	ZK1290.10
R03D7.6	gst-5
Y32F6B.3	crp-1
ZC455.6	ugt-5
T20B6.2	T20B6.2
F54H5.4	klf-3
M6.1	ifc-2
C50F7.5	C50F7.5
D2045.8	D2045.8
Y54G9A.4	zipt-2.3
Y37D8A.16	Y37D8A.16
B0218.2	faah-2
F59C6.11	F59C6.11
F21H7.1	gst-22
R02D5.3	R02D5.3
C46H11.2	C46H11.2
C44F1.1	C44F1.1
C17H12.8	C17H12.8
T23F4.2	T23F4.2
Y37D8A.6	Y37D8A.6
C09F12.1	clc-1
C25E10.3	srsx-34
F11A5.10	glc-1
T01C3.4	fil-1
K08D8.5	K08D8.5
T12B5.8	fbxa-59
C49C8.5	C49C8.5
C12C8.1	hsp-70
Y41D4B.17	Y41D4B.17
K10D11.6	K10D11.6
C36B1.6	C36B1.6
C33H5.13	C33H5.13
F52E1.7	hsp-17
C29F9.4	pals-24
T09F5.12	T09F5.12
F42C5.10	ifo-1
ZK418.7	ZK418.7
C29F3.7	C29F3.7
Y82E9BL.13	fbxa-79
ZK896.5	ZK896.5
C47B2.8	prx-11
F49D11.7	F49D11.7
Y40D12A.2	ctsa-2
Y38H6C.11	fbxa-150
F38E11.1	hsp-12.3
Y53G8AM.5	Y53G8AM.5
F01D5.5	F01D5.5
F08F1.8	tth-1
C50F4.1	C50F4.1
K12D9.3	srw-121
Y54E5A.1	ttm-5
C04G6.1	mpk-2
K11D12.5	swt-7
Y71H2B.7	gpa-17
F36G9.14	fbxa-99
B0222.9	gad-3
ZK550.6	ZK550.6
F02E8.6	ncr-1
K01A2.10	K01A2.10
F53C11.1	F53C11.1
T06D8.1	srap-1
T12A7.6	T12A7.6
B0285.9	ckb-2
C29F3.7	C29F3.7
F59F5.8	F59F5.8
C09F12.1	clc-1
C46H11.11	fhod-1
C54D1.2	clec-86
F23H12.3	F23H12.3
F35E12.6	F35E12.6
C26F1.2	cyp-32A1
B0213.3	nlp-28
F13E6.4	yap-1
C49C8.5	C49C8.5
F18G5.6	F18G5.6
C34D1.5	zip-5
C06B3.3	cyp-35C1
W04B5.1	W04B5.1
F14H3.12	F14H3.12
F59C6.11	F59C6.11
M03A8.1	dhs-28
C18E9.9	C18E9.9
F01D4.2	ugt-44
Y17D7B.1 /// C54E10.5	nhr-231///nhr-170
F07G6.7	fbxa-53
ZK131.4 /// ZK131.1 /// ZK131.8	his-10///his-26/// his-14
C16B8.3	C16B8.3

## Sheet: Wong et al,. 2007
Gene lists from Wong et al., 2007 obtained upon pathogen exposure used for the comparison with upregulated nhr-14(tm1473) genes at log fold change > 1
Enterococcus faecalis 24h (Upregulated)		P. luminescens 24h (Upregulated)
Gene ID	Gene name	Gene ID	Gene name
AC3.4	pqn-2	B0001.6	eri-12
B0035.10	his-45	B0019.1	amx-2
B0035.13	B0035.13	B0024.4	B0024.4
B0222.6	col-144	B0207.3	gpa-14
B0222.7	col-145	B0207.5	B0207.5
B0252.3	B0252.3	B0213.11	cyp-34A6
B0286.4c	not found	B0240.3	daf-11
B0302.4	B0302.4	B0285.7	mnp-1
B0350.2b	not found	B0286.4c	not found
B0432.12	clec-117	B0348.4a	not found
B0464.9	B0464.9	B0391.4	str-12
C01G10.11a	not found	B0393.4	B0393.4
C01G12.6	nspb-10	B0403.4	pdi-6
C01G5.9	C01G5.9	B0414.3	hil-5
C02A12.4	lys-7	B0464.5a	not found
C02C6.2	olrn-1	B0545.1b	not found
C02E7.7	C02E7.7	B0554.6	dod-20
C02F4.1	ced-5	C01A2.6	C01A2.6
C03B1.15	21ur-12998	C01B10.6a	not found
C03B8.4	lin-13	C01C10.1	clc-2
C03C10.5	C03C10.5	C01C4.1	nlp-1
C03D6.4	npp-14	C01G12.1	madf-5
C03G6.15	cyp-35A2	C01G6.4	C01G6.4
C04E6.7	C04E6.7	C01G8.3	dhs-1
C05C10.4	pho-11	C02B8.3	C02B8.3
C05E4.9b	not found	C02F5.3	C02F5.3
C05H8.2	C05H8.2	C02F5.5	C02F5.5
C06A5.4	madf-7	C03C10.2	C03C10.2
C06B3.3	cyp-35C1	C03E10.6	clec-222
C06B8.2a	not found	C03G6.11	srh-231
C06G3.5	C06G3.5	C03G6.17	C03G6.17
C06G4.2c	not found	C04C11.2	arrd-25
C07A9.7a	not found	C04F12.1	C04F12.1
C07G3.5	str-228	C04F6.4	unc-78
C08G5.2	fbxc-48	C05C8.7	C05C8.7
C09D1.1	unc-89	C05D11.7a	not found
C09F5.1	C09F5.1	C05D9.5	ife-4
C09G12.3	srz-78	C06A8.9	glr-4
C10C5.1	pezo-1	C06B3.6	C06B3.6
C10E2.6	mct-6	C06C6.5a	not found
C10H11.4	ugt-28	C06G4.2c	not found
C11D2.1	C11D2.1	C08E3.3	bath-33
C13F10.5	C13F10.5	C08E3.5	fbxa-162
C13G3.3a	not found	C08E3.6	fbxa-163
C14B1.5	dph-1	C09E7.3	oig-1
C14C6.2	C14C6.2	C09F12.1	clc-1
C14C6.5	C14C6.5	C09G9.5	C09G9.5
C14E2.5	C14E2.5	C12D12.1a	not found
C15A11.1	col-35	C12D5.4	C12D5.4
C15A11.3	sol-1	C12D8.1b	not found
C15B12.6	actl-1	C13B9.1	C13B9.1
C15C8.3	hrg-7	C13D9.8	ncx-9
C15F1.7	sod-1	C14A6.6	C14A6.6
C16B8.3	C16B8.3	C14E2.4	C14E2.4
C16C2.2a	not found	C15A11.7	C15A11.7
C16C8.13	C16C8.13	C15F1.5	C15F1.5
C17H12.13	anat-1	C15F1.6	art-1
C17H12.6	C17H12.6	C16A11.1	gpa-11
C18A3.4a	not found	C16B8.3	C16B8.3
C18B2.5a	not found	C16B8.4	C16B8.4
C18D1.2	C18D1.2	C16C10.4	C16C10.4
C18E9.7	C18E9.7	C16D9.9	C16D9.9
C18E9.9	C18E9.9	C17C3.1d	not found
C18F10.9	C18F10.9	C17F3.3	C17F3.3
C18G1.2	elt-7	C17F4.7	C17F4.7
C18H7.2a	not found	C18B2.4	C18B2.4
C23G10.6	ugt-66	C18D11.2	maa-1
C23H4.1	cab-1	C18E9.7	C18E9.7
C24B9.9	dod-3	C18H7.2b	not found
C24H11.8	twk-39	C24H12.7	C24H12.7
C25A11.4c	not found	C25A1.8	clec-87
C25B8.4	clec-266	C25E10.12	C25E10.12
C25D7.2	C25D7.2	C25E10.8	C25E10.8
C26B9.1	C26B9.1	C26B9.1	C26B9.1
C27D8.1	C27D8.1	C26F1.5	grl-10
C28C12.5	spp-8	C27F2.7	C27F2.7
C28H8.2	C28H8.2	C28A5.5	C28A5.5
C28H8.7	C28H8.7	C28H8.9a	not found
C29E4.2	kle-2	C29E4.9	C29E4.9
C29E4.7	gsto-1	C29E6.1	let-653
C29G2.5	srt-58	C29F3.7	C29F3.7
C31B8.13	srh-247	C29F9.3c	not found
C31C9.2	C31C9.2	C30E1.6	C30E1.6
C31H5.1	C31H5.1	C30E1.7	C30E1.7
C32A3.1a	not found	C30F12.2	C30F12.2
C32D5.9	lgg-1	C31A11.3	srbc-83
C32E12.1	C32E12.1	C31E10.7	cytb-5.1
C33D3.5	C33D3.5	C32B5.3	fbxc-16
C34B2.3	C34B2.3	C32D5.9	lgg-1
C34F11.6	msp-49	C32H11.7	C32H11.7
C34F6.10	C34F6.10	C32H11.9	C32H11.9
C35E7.9	C35E7.9	C33A11.4	svh-5
C36B7.3	C36B7.3	C33D9.5	C33D9.5
C36C5.15	C36C5.15	C33H5.16	C33H5.16
C39E6.2	C39E6.2	C34B2.3	C34B2.3
C39E9.10	spin-2	C34D10.1	C34D10.1
C40H1.5	ttr-5	C35E7.5a	not found
C41D11.6	C41D11.6	C36A4.9	acs-19
C42C1.6	C42C1.6	C36E8.1	C36E8.1
C42D8.5	acn-1	C37A2.8b	not found
C43D7.5	sdz-6	C38C6.2	atgp-2
C43H6.2	C43H6.2	C38D4.8	arl-6
C43H6.7	dhhc-9	C38D9.1	fbxa-171
C44B7.6	slc-36.5	C39B10.1	C39B10.1
C44C10.1	col-180	C39B10.2	lgc-41
C44C3.2	srw-129	C39B5.12	srd-65
C44C8.6a	not found	C39B5.6	C39B5.6
C44H9.5	C44H9.5	C41D11.3	C41D11.3
C45B2.6	C45B2.6	C43H6.7	dhhc-9
C45G7.4	C45G7.4	C44H4.3	sym-1
C45G9.6b	not found	C44H9.6	C44H9.6
C46F2.1	C46F2.1	C45B2.1	C45B2.1
C46H11.2	C46H11.2	C45E1.4	C45E1.4
C47E12.6b	not found	C45G7.2	ilys-2
C48E7.4	C48E7.4	C45G7.3	ilys-3
C49A9.5	C49A9.5	C45G9.2	C45G9.2
C49F5.6	C49F5.6	C46C2.4	C46C2.4
C49G7.3	C49G7.3	C46E10.8	C46E10.8
C50B6.7	C50B6.7	C47A10.8	srx-18
C50F7.5	C50F7.5	C47A4.3	C47A4.3
C52B9.7b	not found	C47B2.6	gale-1
C52E2.8	C52E2.8	C47C12.3	ref-2
C52E4.1	cpr-1	C48B4.1	acox-1.5
C53B7.3	C53B7.3	C49A9.5	C49A9.5
C53D5.4	ztf-3	C49C3.4	C49C3.4
C54C6.5	C54C6.5	C49C3.9	C49C3.9
C54D2.5a	not found	C49D10.11	sdz-7
C54G4.7	C54G4.7	C49G7.10	C49G7.10
C55A1.6	C55A1.6	C50A2.4	ets-8
C55F2.1b	not found	C50E10.7	sre-55
C56E6.3	toe-2	C50F4.7	his-37
C56G7.1	mlc-4	C50F7.2	clx-1
D1014.3	snap-1	C50F7.5	C50F7.5
D1081.6	D1081.6	C50H11.3	srt-71
D1086.7	D1086.7	C50H11.5	srt-9
D2089.2	2019-03-02	C52E12.4	lst-6
DH11.5	DH11.5	C52E4.3	snr-4
DY3.4b	not found	C53A5.2	C53A5.2
E01B7.2	E01B7.2	C53D6.2	unc-129
E01F3.1b	not found	C54A12.2	frpr-4
E01G4.3	E01G4.3	C54C8.9	nlp-39
E02C12.11	E02C12.11	C54D1.4	alh-10
E02C12.9	E02C12.9	C54F6.5	C54F6.5
E04A4.7	cyc-2.1	C54G4.4	C54G4.4
E04F6.3	maoc-1	C55A6.6	C55A6.6
E04F6.9	E04F6.9	D1054.10	D1054.10
EEED8.8	ndx-6	D1069.1	D1069.1
F01F1.2	F01F1.2	D2024.9	D2024.9
F01F1.9	dnpp-1	D2062.6	msrp-6
F01G4.6	F01G4.6	D2085.1	pyr-1
F07C3.7	aat-2	D2092.4	D2092.4
F07D10.1	rpl-11.2	E01F3.1a	not found
F07H5.4	F07H5.4	E04F6.3	maoc-1
F07H5.8	F07H5.8	E04F6.7	dhs-7
F08B6.2	gpc-2	E04F6.9	E04F6.9
F08H9.8	clec-54	EGAP7.1	dpy-3
F09B12.3	F09B12.3	F01D4.2	ugt-44
F09E10.3	dhs-25	F02A9.6	glp-1
F09E8.1	spe-43	F02D10.4	F02D10.4
F09G8.3	mrps-9	F07A11.4	F07A11.4
F10A3.2	fbxa-88	F07C3.3	F07C3.3
F10E9.8	sas-4	F07E5.5	F07E5.5
F10G2.9	nhr-263	F07E5.6	fbxb-36
F10G8.5	ncs-2	F08B12.1	prmn-1
F11D5.6	F11D5.6	F08C6.2	pcyt-1
F13B12.5	ins-1	F08F1.8	tth-1
F13B9.8	fis-2	F08G12.4	vhl-1
F13D12.8	F13D12.8	F08G5.6	irg-4
F13E9.2	fipr-14	F09G8.4	ncr-2
F13G3.9	mif-3	F10C2.3	F10C2.3
F13H10.4	mogs-1	F11A6.2	scrm-4
F13H6.3	F13H6.3	F11C1.2	mff-1
F14B6.1	sdz-14	F12A10.3	basl-2
F14B8.4	F14B8.4	F12F3.2b	not found
F14D7.7	F14D7.7	F12F6.9	col-128
F14F9.2	F14F9.2	F13A7.3	srv-34
F15D3.4	F15D3.4	F13D12.6	F13D12.6
F16C3.1	F16C3.1	F13G11.2	irld-4
F17E9.11	lys-10	F13H6.3	F13H6.3
F18A1.1	F18A1.1	F14D12.4a	not found
F18A12.8b	not found	F14E5.5	lips-10
F18E3.8	F18E3.8	F14F11.2	nlp-55
F18E9.6	F18E9.6	F14H3.10	cyp-35D1
F19B10.11	F19B10.11	F15B10.2	drh-1
F19B2.5	F19B2.5	F15D4.4	F15D4.4
F19H8.3	arl-3	F16H11.5	nhr-45
F20A1.10	F20A1.10	F17C11.8	vps-36
F21C10.10	F21C10.10	F17E5.2	F17E5.2
F21C10.11	F21C10.11	F17E9.11	lys-10
F21F3.1	pgal-1	F18C5.10	F18C5.10
F21F8.3	asp-5	F19B2.5	F19B2.5
F21F8.7	asp-6	F19C7.1	F19C7.1
F21H11.3	tbx-2	F19C7.7	col-110
F21H7.2	F21H7.2	F19G12.1	F19G12.1
F22D6.2	F22D6.2	F19G12.7	abu-2
F22F4.2	inx-3	F21D12.1b	not found
F23H12.4	sqt-3	F21F8.3	asp-5
F23H12.6	gcy-13	F21F8.7	asp-6
F23H12.8	fipr-1	F21G4.6	F21G4.6
F25B4.2	peli-1	F21H12.6	tpp-2
F25C8.3	unc-80	F21H7.1	gst-22
F25E2.4	ifd-2	F22B7.1	F22B7.1
F25H8.6	bed-3	F22B7.3	F22B7.3
F26A10.2	F26A10.2	F22F1.1	hil-3
F26A3.4	F26A3.4	F23A7.6	F23A7.6
F26D2.13	F26D2.13	F23H11.3	sucl-2
F26E4.11	hrdl-1	F25B3.5	F25B3.5
F27C1.4	F27C1.4	F25C8.3	unc-80
F27C1.7	atp-3	F25H9.1	lurp-2
F27D4.5	bckd-1B	F26A10.2	F26A10.2
F27E5.1	asah-2	F26B1.7	let-381
F28A12.4	asp-13	F26G5.5	str-209
F28B4.3	F28B4.3	F26G5.9	tam-1
F28D1.5	thn-2	F27B10.1	F27B10.1
F29C4.7b	not found	F27C8.4	spp-18
F31F7.1	F31F7.1	F27D4.6	F27D4.6
F32A7.3a	not found	F27E5.4	phg-1
F32B5.6a	not found	F28B4.3	F28B4.3
F32G8.6	cat-4	F28C1.2	egl-10
F32H5.1	F32H5.1	F28D9.4	F28D9.4
F35B3.4	F35B3.4	F30A10.4	F30A10.4
F35C5.6	clec-63	F30B5.7	zipt-2.2
F35E2.5	F35E2.5	F31D5.3d	not found
F35H12.3	sel-12	F32A7.1	srw-92
F36A2.3	F36A2.3	F32E10.3	clec-180
F36D3.9	cpr-2	F32E10.8	F32E10.8
F36G9.10	sri-3	F32H2.4	thoc-3
F36H5.2b	not found	F33D11.6	F33D11.6
F36H9.4	F36H9.4	F35A5.2	F35A5.2
F37A4.5	F37A4.5	F35C5.6	clec-63
F37A4.7b	not found	F35C5.9	clec-66
F38A1.13	F38A1.13	F35E12.7	dct-17
F38C2.1	F38C2.1	F35E8.11	cdr-1
F38G1.1	che-2	F35E8.8	gst-38
F39H12.2	F39H12.2	F36D3.8	F36D3.8
F39H2.1	flp-22	F36H12.2	F36H12.2
F39H2.2a	not found	F37B12.3	F37B12.3
F40F12.7	cbp-3	F37C12.1	F37C12.1
F40F4.4	lbp-3	F37C4.5	F37C4.5
F40F4.6	irg-7	F38A1.10	clec-165
F40G12.2	F40G12.2	F38B6.6	F38B6.6
F40G9.5	F40G9.5	F38C2.1	F38C2.1
F41B5.10	nhr-183	F38E9.2	nas-39
F41E6.1	F41E6.1	F39G3.3	F39G3.3
F41E6.11	F41E6.11	F40A3.3	F40A3.3
F41F3.3	F41F3.3	F40A3.5	nipi-4
F41G4.7	F41G4.7	F40B1.1	bath-13
F41H10.7	elo-5	F40F12.2	F40F12.2
F42F12.1	nspc-9	F40F4.6	irg-7
F42H10.2	F42H10.2	F40F8.7	pqm-1
F43E2.7a	not found	F40F9.2	tag-120
F43G6.10	F43G6.10	F40F9.6a	not found
F43G6.3	F43G6.3	F40G9.11	mxl-2
F44A2.1a	not found	F40H7.4	srx-101
F44A2.3	F44A2.3	F41A4.1	cutl-28
F44B9.1b	not found	F41B5.9	nhr-182
F44C4.3	cpr-4	F41E6.1	F41E6.1
F44F4.7	sra-12	F42A10.1	abcf-3
F45D11.10	fbxc-39	F42A6.4	cyp-25A5
F45E4.6	F45E4.6	F42A6.6	F42A6.6
F46A9.2	F46A9.2	F42E8.1	F42E8.1
F46B6.10	F46B6.10	F42F12.1	nspc-9
F46C3.3	hum-4	F42F12.9	nspc-10
F46F11.5	vha-10	F42G2.1	F42G2.1
F46H5.2	F46H5.2	F42G4.2	F42G4.2
F47E1.3	F47E1.3	F42G8.4	pmk-3
F48C11.1	gpa-6	F42G9.4	nlp-52
F48F5.1	F48F5.1	F42G9.6a	not found
F48F5.3	F48F5.3	F43D2.4	hot-1
F49E10.4b	not found	F43D9.5	taf-11.3
F52A8.1	F52A8.1	F44A2.1a	not found
F52B10.1	nmy-1	F44A2.3	F44A2.3
F52B11.3	noah-2	F44B9.3a	not found
F52D10.3a	not found	F44B9.8	F44B9.8
F52H3.3	bath-38	F44D12.2	F44D12.2
F52H3.7a	not found	F44E7.2	pgph-2
F52H3.7b	not found	F44F1.7	vet-6
F53A2.3	F53A2.3	F44G3.6	skr-3
F53A9.1	F53A9.1	F44G4.8	dep-1
F53A9.6	F53A9.6	F45D11.14	F45D11.14
F53A9.7	F53A9.7	F45D3.4	F45D3.4
F53A9.8	F53A9.8	F45E4.3b	not found
F53A9.9	F53A9.9	F45E6.2	atf-6
F53B3.3	F53B3.3	F46A9.5	skr-1
F53B6.4	F53B6.4	F46C5.2	F46C5.2
F53F1.5	cut-2	F46C5.4	F46C5.4
F53F10.2b	F53F10.2	F46F3.1	ceh-27
F53H4.5	gmeb-2	F46G10.1	F46G10.1
F54C9.10	arl-1	F47B3.7	F47B3.7
F54C9.3	F54C9.3	F47B8.1	F47B8.1
F54D10.4	F54D10.4	F47C10.2	btb-21
F54D10.9	F54D10.9	F48C1.9	F48C1.9
F54D5.3	F54D5.3	F48D6.4b	not found
F54D5.7	F54D5.7	F48D6.4c	not found
F54D8.1	Multiple entries : 2	F48E8.1b	not found
F54D8.3b	not found	F49D11.9	tag-296
F54E2.6	srt-34	F49E12.10	F49E12.10
F54F11.2	nep-17	F49H6.3	F49H6.3
F54F3.1	nid-1	F52D1.2	F52D1.2
F55C9.9	not found	F52E1.7	hsp-17
F55F3.3	nkb-3	F52F12.7	strl-1
F56B3.8	mrpl-2	F52H3.1	let-268
F56C11.6	F56C11.6	F53A2.5	dro-1
F56C4.2	F56C4.2	F53A9.2	kreg-1
F56D1.5	dhs-5	F53A9.8	F53A9.8
F56F10.3	cdo-1	F53B2.6	ham-1
F57A8.1	F57A8.1	F53F1.8	srv-9
F57C7.5	F57C7.5	F53G2.4a	not found
F57F4.3	gfi-1	F54C8.6	F54C8.6
F57F5.1	F57F5.1	F54C9.3	F54C9.3
F58A6.11	srb-13	F54D5.11	gtf-2E2
F58B3.1	lys-4	F54D5.3	F54D5.3
F58B3.2	lys-5	F54D5.4	F54D5.4
F58D2.2	F58D2.2	F54D7.2	ept-1
F58D5.2	F58D5.2	F54E2.1	F54E2.1
F58E1.4	irld-36	F54F7.6	F54F7.6
F58E1.9	fbxb-19	F55A11.4	F55A11.4
F58G6.7	F58G6.7	F55A4.10	cutl-21
F58H1.4	dpy-17	F55B11.4	F55B11.4
F59A1.6	F59A1.6	F56A8.6	cpf-2
F59C12.2	ser-1	F56B3.5	ech-5
F59D6.3	asp-8	F56F12.1	F56F12.1
F59F4.2	F59F4.2	F56H9.2	F56H9.2
H06O01.1	pdi-3	F57A8.1	F57A8.1
H10E21.4	H10E21.4	F57B1.5	F57B1.5
H22K11.1	asp-3	F57C12.4	mrp-2
H27D07.5	srw-122	F57F4.4	F57F4.4
H28G03.1c	not found	F58B3.6	F58B3.6
H32C10.3	dhhc-13	F58E1.14	fbxb-47
H34I24.2	H34I24.2	F58G1.4	dct-18
H36L18.2	lep-5	F58G11.6	ccz-1
JC8.8	ttr-51	F58H7.8	fbxc-3
K01A2.11b	not found	F59A1.4	str-89
K01A2.8b	not found	F59A1.6	F59A1.6
K01H12.2	ant-1.3	F59A7.6	F59A7.6
K02B12.7	K02B12.7	F59B1.8	F59B1.8
K03H1.3	ttr-3	F59B2.10	F59B2.10
K04A8.6	dre-1	F59E11.7	F59E11.7
K04F1.13	irld-44	F59E12.3	F59E12.3
K04F10.4a	not found	F59G1.1b	not found
K05C4.6	hmp-2	H03A11.2	H03A11.2
K05C4.7	K05C4.7	H04M03.8	srv-21
K05F1.2	msp-142	H06I04.1c	not found
K05F1.7	msp-63	H06O01.1	pdi-3
K05F6.2	fbxb-50	H10E21.1	H10E21.1
K06A5.3	K06A5.3	H17B01.1b	not found
K06G5.1	K06G5.1	H20J04.3	madf-3
K07A1.3	K07A1.3	H22K11.1	asp-3
K07B1.8	K07B1.8	H35N09.2	H35N09.2
K07C11.10	K07C11.10	JC8.8	ttr-51
K07F5.2	msp-10	K01D12.11	cdr-4
K08B5.1	K08B5.1	K02E7.4	K02E7.4
K08C7.5	fmo-2	K02F6.2	K02F6.2
K08D12.6	K08D12.6	K04A8.10	K04A8.10
K08F4.8	msp-38	K04A8.2	K04A8.2
K08G2.6	srh-151	K04F10.4e	not found
K08H10.7	rde-1	K04G7.4a	nuo-4
K08H2.4	K08H2.4	K04H4.6a	not found
K09C6.2	K09C6.2	K05C4.1	pbs-5
K09E9.1	K09E9.1	K05C4.6	hmp-2
K09F5.3a	not found	K05D4.3	srz-14
K10B2.2	ctsa-1	K06A4.1	nas-3
K10C2.1	K10C2.1	K06A4.4	swt-5
K10C2.3	asp-14	K06A4.7	K06A4.7
K10G6.3	sea-2	K06G5.1	K06G5.1
K10H10.6	K10H10.6	K07G5.3	mks-6
K11D2.2	asah-1	K07H8.9	K07H8.9
K11G12.2	acr-2	K08B12.2b	not found
K11G12.7	acr-3	K08B12.5	mrck-1
K11G9.6	mtl-1	K08D8.5	K08D8.5
K11H12.3	K11H12.3	K08D8.6	K08D8.6
K12D12.5	K12D12.5	K08F11.4a	not found
K12F2.2b	not found	K08H10.1	lea-1
K12G11.3	sodh-1	K08H2.1	skr-21
K12H4.7a	not found	K09C6.6	K09C6.6
M01A8.2	clip-1	K09D9.12	K09D9.12
M01E5.1	M01E5.1	K09E10.1	oac-57
M01F1.3	M01F1.3	K09F6.4	K09F6.4
M01F1.8	M01F1.8	K09F6.5	K09F6.5
M03A8.1	dhs-28	K10C2.1	K10C2.1
M04C7.1	gpa-15	K10D3.2	unc-14
M05D6.5	M05D6.5	K10F12.3b	not found
M162.2	clec-258	K11D12.3	srr-4
M163.4	gfi-3	K11E4.1	K11E4.1
M28.6	lact-3	K11G9.6	mtl-1
M60.4	M60.4	K12B6.1	sago-1
R02E12.6	hrg-1	K12G11.3	sodh-1
R02F2.1a	not found	LLC1.2	LLC1.2
R02F2.4	R02F2.4	M01B12.1	M01B12.1
R03G5.1	eef-1A.2	M01E10.3	M01E10.3
R05F9.3	msp-32	M01H9.2	M01H9.2
R06A10.1	R06A10.1	M02H5.8	M02H5.8
R06C1.4	R06C1.4	M03A1.6a	not found
R07E3.5	acl-5	M03A8.1	dhs-28
R07E4.6b	not found	M03C11.5	ymel-1
R07G3.1	cdc-42	M28.6	lact-3
R08C7.8	R08C7.8	M60.2	endu-2
R08E3.1	R08E3.1	M7.3	bcc-1
R08E3.3	R08E3.3	PAR2.4b	not found
R10E11.2	vha-2	R01H10.1	div-1
R10E4.1	R10E4.1	R01H2.5	ger-1
R10F2.2	R10F2.2	R02D5.1	R02D5.1
R11.4	R11.4	R03D7.6	gst-5
R12B2.5b	not found	R04D3.2	R04D3.2
R13D11.7	R13D11.7	R04D3.8	srd-39
R13H4.5	R13H4.5	R05D3.2	R05D3.2
T01B11.4	ant-1.4	R05D8.6	srg-58
T01E8.4	mec-15	R07B1.1	vab-15
T01G1.2	T01G1.2	R07B1.10	lec-8
T01G9.6a	not found	R07C3.6	fbxc-28
T02G5.2	T02G5.2	R08E5.4	R08E5.4
T02G5.7	T02G5.7	R08H2.12	srh-107
T04A8.4	mec-15	R08H2.2	str-88
T04D3.4	gcy-35	R09A1.1	ergo-1
T05A8.4	nep-2	R09B3.1	exo-3
T05B4.9	T05B4.9	R09B5.11	R09B5.11
T05C3.2	T05C3.2	R09B5.6	hacd-1
T05E11.6	hpo-4	R09H3.3	R09H3.3
T05F1.6a	not found	R107.7	gst-1
T06D8.3	plpr-1	R11G1.3	gst-11
T06E4.10	T06E4.10	R12C12.3	frpr-16
T07H6.3	col-166	R12E2.2	suco-1
T08A9.9	spp-5	R12E2.6	R12E2.6
T08B2.7a	not found	R160.4	R160.4
T08G11.3	T08G11.3	R53.1	flad-1
T08G5.10	mtl-2	R53.7a	not found
T09E11.4	oac-43	R74.2	R74.2
T09F3.1	ztf-27	R74.5	asd-1
T09F5.9	clec-47	T01B4.1	twk-21
T10H4.9	srx-51	T01C4.2a	not found
T12B5.13	fbxa-23	T01D3.1	T01D3.1
T12F5.3	glh-4	T01D3.6b	not found
T12G3.1	sqst-1	T02C5.2	T02C5.2
T13A10.1	T13A10.1	T02E1.3b	not found
T13F2.11	msp-78	T03G11.2	sru-48
T13H5.3	cht-2	T04A8.14	emb-5
T14B4.7	dpy-10	T04A8.3	clec-155
T14G10.8	T14G10.8	T04A8.9	dnj-18
T14G12.4b	not found	T05A7.6	T05A7.6
T15B12.1	T15B12.1	T05E11.2	T05E11.2
T15B7.7	T15B7.7	T05G5.8	vps-53
T15B7.8	T15B7.8	T06D8.1a	not found
T15D6.11	T15D6.11	T06E6.3	fbxa-199
T15D6.3	gly-17	T07A9.10	T07A9.10
T16A9.5	T16A9.5	T07C12.3	srj-35
T18H9.2	asp-2	T07C4.9	nex-2
T18H9.4	str-177	T07C5.1c	not found
T20B5.2	T20B5.2	T07G12.3	T07G12.3
T20F5.4	T20F5.4	T08B1.6	acs-3
T20G5.5	epac-1	T08D10.3	T08D10.3
T21B4.7	srh-69	T08G11.3	T08G11.3
T21C9.10	T21C9.10	T08G5.10	mtl-2
T21C9.3b	not found	T09B4.7	T09B4.7
T21C9.9	T21C9.9	T09B9.3	T09B9.3
T21H3.1	T21H3.1	T09E11.8	T09E11.8
T22C8.5	sptf-2	T09F5.1	T09F5.1
T22E5.5	mup-2	T10B10.7	ocr-3
T23B3.4	ckr-1	T10B9.1	cyp-13A4
T23B3.5	T23B3.5	T10C6.9	T10C6.9
T23D5.7	str-19	T10G3.2	T10G3.2
T23D8.9a	not found	T10H10.2	T10H10.2
T23G5.6	saeg-2	T10H4.12	cpr-3
T23H4.2	nhr-69	T10H4.6	srw-17
T24A11.2	xbx-5	T10H4.8	srw-19
T24D8.2	T24D8.2	T11F9.11	dhs-19
T25B6.2	nep-22	T12A2.2	stt-3
T25B9.5	T25B9.5	T12B3.1	T12B3.1
T25C12.2	spp-9	T12F5.5	larp-5
T25C12.3	T25C12.3	T12G3.1	sqst-1
T25C8.2	act-5	T13C2.3	T13C2.3
T25G12.11	T25G12.11	T14G12.5	T14G12.5
T26E4.2	T26E4.2	T16D1.2	pho-4
T26E4.4	T26E4.4	T19A5.1	ttc-17
T27A1.6	mab-9	T19A5.5	nhr-219
T27C10.1	srt-61	T19C3.1	best-17
T27F7.3a	not found	T19C3.4	T19C3.4
T28A8.7	mlh-1	T19D12.4	T19D12.4
T28D6.9	pen-2	T19F4.1b	not found
T28F3.8	T28F3.8	T20D3.2	T20D3.2
T28F4.5	T28F4.5	T20G5.8	T20G5.8
T28H10.3	T28H10.3	T20H9.5	fbxa-68
T28H11.1	ssq-4	T21E12.2	T21E12.2
VC5.3	npa-1	T21H3.1	T21H3.1
VT23B5.1	Multiple entries : 2	T22C8.5	sptf-2
VW02B12L.1	vha-6	T22G5.1	T22G5.1
W01A11.4	lec-10	T22H6.6	gei-3
W01A11.5	cpt-6	T23B3.5	T23B3.5
W01A11.7	W01A11.7	T23E7.3	T23E7.3
W02B12.7	klp-17	T23F11.3	cdka-1
W02B3.6	W02B3.6	T23G7.4	sec-5
W03A5.2	W03A5.2	T24A6.13	srbc-68
W03A5.3	grl-22	T24B1.1	T24B1.1
W03D8.6	itx-1	T24B8.3	T24B8.3
W03F11.3	dct-9	T24B8.5	T24B8.5
W03G1.5	W03G1.5	T24C12.3	T24C12.3
W03G1.7	asm-3	T24C4.4	T24C4.4
W04B5.3a	not found	T24D5.4	T24D5.4
W04H10.2	W04H10.2	T24D8.1	lgc-40
W05E10.4	tre-3	T24D8.5	nlp-2
W05G11.6d	not found	T24H10.3	dnj-23
W06B11.4	hog-1	T24H7.5c	not found
W06F12.2b	not found	T25B6.7	snf-12
W06F12.3	W06F12.3	T25C12.3	T25C12.3
W07B3.2b	not found	T25D3.4	T25D3.4
W07B8.5	cpr-5	T26C11.4	T26C11.4
W07G4.5	W07G4.5	T26C5.3a	not found
W08D2.4	fat-3	T26E4.10	T26E4.10
W09G12.8	W09G12.8	T27A1.1	T27A1.1
Y105C5B.12a	not found	T27A1.6	mab-9
Y105C5B.3	Y105C5B.3	T27B7.1	nhr-59
Y105E8A.2	Y105E8A.2	T27C10.5	T27C10.5
Y105E8A.3	Y105E8A.3	T27E9.9	acc-4
Y111B2A.12	Y111B2A.12	T28A11.14	T28A11.14
Y111B2A.22	ssl-1	T28B4.4	hic-1
Y111B2A.23	Y111B2A.23	T28C12.4a	not found
Y113G7A.9	dcs-1	T28F2.5	ccb-1
Y113G7C.1	Y113G7C.1	T28H10.3	T28H10.3
Y116A8C.3	Y116A8C.3	W01F3.1b	not found
Y116A8C.6	Y116A8C.6	W02D7.8	W02D7.8
Y116F11A.1	Y116F11A.1	W03D2.7	ilys-6
Y116F11B.3	pcp-4	W03D8.6	itx-1
Y116F11B.6	Y116F11B.6	W03F8.8	W03F8.8
Y119D3B.12a	not found	W03G11.3	W03G11.3
Y16B4A.2	Y16B4A.2	W03G9.1	snf-1
Y22F5A.4	lys-1	W03H9.3	W03H9.3
Y34B4A.9	Y34B4A.9	W04B5.3a	not found
Y34F4.5	Y34F4.5	W05F2.4	W05F2.4
Y37A1B.2b	not found	W06F12.1a	not found
Y37E3.15a	not found	W06H3.1	immt-2
Y37E3.3	rpb-10	W06H8.1d	not found
Y37H2A.4	fbxa-107	W07B3.2b	not found
Y38A10A.5	crt-1	W07G4.4	lap-2
Y38C1AA.11	prdx-6	W08A12.2	W08A12.2
Y38F2AL.4	vha-3	W09D12.1	zmp-4
Y39A1A.18	Y39A1A.18	Y102A5C.8	fbxa-110
Y39A1C.3	cey-4	Y105E8A.4	ech-7
Y39A3B.3	Y39A3B.3	Y106G6A.2b	epg-8
Y39B6A.1	Y39B6A.1	Y110A7A.17	mat-1
Y39B6A.19	twk-46	Y113G7B.11	Y113G7B.11
Y39B6A.20	asp-1	Y15E3A.1	nhr-91
Y39B6A.24	asp-17	Y17D7B.6	clec-256
Y39G8B.3	sre-48	Y17G7B.8	Y17G7B.8
Y40D12A.2	ctsa-2	Y18D10A.12	clec-106
Y43C5A.1	nspd-7	Y18H1A.11	Y18H1A.11
Y43C5A.2	Y43C5A.2	Y18H1A.9	Y18H1A.9
Y43D4A.4	Y43D4A.4	Y19D10A.9	clec-209
Y43F8B.2b	not found	Y1H11.2	gst-35
Y43F8B.3	Y43F8B.3	Y20F4.4	Y20F4.4
Y43H11AL.1	Y43H11AL.1	Y22F5A.4	lys-1
Y44A6D.6	Y44A6D.6	Y22F5A.5	lys-2
Y45F10A.3	afmd-2	Y26D4A.10	Y26D4A.10
Y45F3A.9	Y45F3A.9	Y26G10.2	srh-32
Y45G12B.2a	not found	Y34B4A.10	Y34B4A.10
Y45G12C.1	Y45G12C.1	Y34B4A.6	Y34B4A.6
Y45G5AM.5	Y45G5AM.5	Y34B4A.9	Y34B4A.9
Y46C8AR.1	clec-76	Y37E3.15a	not found
Y46G5A.11	Y46G5A.11	Y37H2A.11	Y37H2A.11
Y46G5A.4	snrp-200	Y38A10A.5	crt-1
Y46H3A.3	hsp-16.2	Y38F2AL.6	Y38F2AL.6
Y46H3A.6	gly-7	Y38F2AR.2	trap-3
Y48B6A.1	Y48B6A.1	Y39A1A.15b	not found
Y48C3A.11	dmsr-3	Y39A1C.4	hex-3
Y48E1B.5	mrpl-37	Y39B6A.20	asp-1
Y49E10.16	Y49E10.16	Y39B6A.24	asp-17
Y49F6B.5	sdz-32	Y39B6A.30	Y39B6A.30
Y51A2A.3	Y51A2A.3	Y39B6A.5	Y39B6A.5
Y51A2D.19b	not found	Y39E4B.12b	not found
Y51F10.10	spe-48	Y39G10AR.16	Y39G10AR.16
Y51H7BR.5	Y51H7BR.5	Y39G10AR.8	eif-2gamma
Y51H7BR.7	Y51H7BR.7	Y40C7B.4	Y40C7B.4
Y53G8AM.5	Y53G8AM.5	Y43D4A.6	Y43D4A.6
Y53H1B.2	Y53H1B.2	Y43F8C.11	Y43F8C.11
Y54E10A.1	Y54E10A.1	Y44E3A.1	Y44E3A.1
Y54E10A.4a	not found	Y45G12C.15	srj-20
Y54E10BL.2	col-48	Y46C8AL.2	clec-174
Y54F10AM.6	Y54F10AM.6	Y46C8AL.8	clec-74
Y54F10BM.3	Y54F10BM.3	Y46D2A.2	Y46D2A.2
Y54G11A.13	ctl-3	Y46H3A.3	hsp-16.2
Y54G2A.22	fbxc-45	Y46H3B.1	clec-205
Y54G9A.4	zipt-2.3	Y47H10A.5	Y47H10A.5
Y57G11A.2	Y57G11A.2	Y47H9C.9	Y47H9C.9
Y5F2A.4	Y5F2A.4	Y48E1B.10	gst-20
Y61B8B.2	Y61B8B.2	Y48E1C.4b	not found
Y65B4BR.6	grl-16	Y48G8AR.1	grh-1
Y67D8C.1	Y67D8C.1	Y48G9A.3	gcn-1
Y67H2A.4b	not found	Y48G9A.6	Y48G9A.6
Y6B3B.11	hsd-1	Y49A3A.2	vha-13
Y6D1A.2	Y6D1A.2	Y50E8A.16	haf-7
Y6E2A.9	sfxn-1.3	Y50E8A.2	Y50E8A.2
Y71F9B.1	Y71F9B.1	Y51F10.10	spe-48
Y71H2AM.12	Y71H2AM.12	Y51F10.7	Y51F10.7
Y73B3A.5	elk-2	Y51H7C.6a	not found
Y73F8A.1	pkd-2	Y53C10A.3	hsf-2
Y75B12B.7	srw-1	Y53G8AL.3	Y53G8AL.3
Y75B7AR.1	Y75B7AR.1	Y53G8AM.7	Y53G8AM.7
Y75D11A.2	Y75D11A.2	Y54E10A.11	Y54E10A.11
Y76B12C.3	Y76B12C.3	Y54E2A.12	tbc-20
Y7A5A.3	Y7A5A.3	Y54E2A.7	Y54E2A.7
Y82E9BR.9	Y82E9BR.9	Y54F10AL.1a	not found
Y8G1A.1	math-46	Y54F10BM.13	Y54F10BM.13
Y92H12BL.2	Y92H12BL.2	Y54G11A.12	srh-41
Y94A7B.1	srh-292	Y54G11A.5a	not found
Y94H6A.3	Y94H6A.3	Y54G11A.6	ctl-1
Y9C9A.18	str-159	Y54G2A.7	Y54G2A.7
ZC247.2	ZC247.2	Y54G9A.4	zipt-2.3
ZC376.7b	not found	Y55B1AR.1	lec-6
ZC376.8	ZC376.8	Y55F3AM.14	Y55F3AM.14
ZC395.4	ZC395.4	Y55F3C.2	srt-23
ZC395.5	ZC395.5	Y57A10B.1	marc-5
ZC395.7	hap-1	Y58A7A.5	Y58A7A.5
ZC404.11	dmsr-11	Y59C2A.2	Y59C2A.2
ZC412.6	nspa-5	Y5H2B.2	nhr-13
ZC434.5	ears-1	Y60A3A.4	srh-173
ZC449.5	ZC449.5	Y62F5A.1b	not found
ZC513.10	fbxa-223	Y65B4BL.6	Y65B4BL.6
ZC513.8	col-43	Y65B4BR.6	grl-16
ZC518.3a	not found	Y67D8C.9	Y67D8C.9
ZC518.3b	not found	Y71D11A.5	lgc-46
ZK1025.9	nhr-113	Y71F9AR.1	bam-2
ZK1037.7	srw-70	Y71F9B.8	lron-11
ZK112.1	pcp-1	Y73B3A.5	elk-2
ZK1251.6	msp-76	Y73B6BL.31	Y73B6BL.31
ZK1320.3	ZK1320.3	Y73F8A.32	Y73F8A.32
ZK154.1	ZK154.1	Y76A2B.6	scav-2
ZK177.8b	not found	Y77E11A.11	clp-7
ZK218.7	ZK218.7	Y77E11A.4	jtr-1
ZK228.7	srh-179	Y7A5A.6	Y7A5A.6
ZK287.6	ztf-9	Y87G2A.13	Y87G2A.13
ZK354.11	msp-59	Y92H12BL.5	Y92H12BL.5
ZK455.1	aco-1	Y95B8A.1	nas-30
ZK507.1	ZK507.1	Y97E10AR.2	Y97E10AR.2
ZK520.1	ZK520.1	ZC13.4	mab-7
ZK593.2	ZK593.2	ZC204.6	ZC204.6
ZK616.8	ZK616.8	ZC373.6	dao-4
ZK632.10	ZK632.10	ZC404.9	gck-2
ZK632.8	arl-5	ZC449.5	ZC449.5
ZK643.6	ZK643.6	ZC455.9	srbc-44
ZK666.2	ZK666.2	ZC487.5	grl-8
ZK742.3	ZK742.3	ZC8.4a	not found
ZK795.1	ipmk-1	ZK1320.3	ZK1320.3
ZK909.3	ZK909.3	ZK256.1	pmr-1
		ZK265.7	ZK265.7
		ZK287.4	ZK287.4
		ZK353.3	ZK353.3
		ZK418.7	ZK418.7
		ZK484.3	ZK484.3
		ZK488.7	pqn-98
		ZK524.1	spe-4
		ZK6.10	dod-19
		ZK6.7a	not found
		ZK632.5	ZK632.5
		ZK673.1	ZK673.1
		ZK892.2	nlt-1
		ZK892.3	ZK892.3
		ZK896.2	ZK896.2
		ZK896.4	ZK896.4
		ZK909.1	ZK909.1
		ZK945.1	lact-2
		ZK945.2	pas-7
		ZK970.6	gcy-5

## Sheet: Visvikis et al., 2014
Gene list from Visvikis et al. 2014 obtained upon S. aureus exposure used for the comparison with upregulated nhr-14(tm1473) genes at log fold change > 1
Gene ID	Gene name
W02D9.10.1	w02d9.10
T05G5.12.1	dao-6
M02H5.1.1	nhr-99
C46F4.2.1, C46F4.2.2, C46F4.2.3	acs-17
F11F1.6.1	f11f1.6
ZC581.3.1	zc581.3
Y51A2D.9b.1, Y51A2D.9b.2, Y51A2D.9a.1	ttr-24
F07C3.9.1	f07c3.9
T21C9.8.1, T21C9.8.2	ttr-23
F52H3.3.1	bath-38
Y51A2D.10a.1, Y51A2D.10b.1	ttr-25
F47A4.5.1	f47a4.5
Y5F2A.2.1, Y5F2A.2.2	ttr-17
C17C3.12d.1, C17C3.12b.1, C17C3.12a.1, C17C3.12a.2, C17C3.12e.1, C17C3.12c.1	acdh-2
F10G2.3.1	clec-7
Y94H6A.5a.1, Y94H6A.5b.1	y94h6a.5
M01H9.3a.1, M01H9.3b.1, M01H9.3c.1, M01H9.3d.1, M01H9.3d.2, M01H9.3e.1	m01h9.3
M01H9.4h.1, M01H9.4e.1, M01H9.4a.1, M01H9.4d.1	m01h9.4
C47A10.5b.1, C47A10.5a.1	c47a10.5
M01H9.1.1	m01h9.1
C45B11.3.1, C45B11.3.2	dhs-18
Y5H2B.5.1	cyp-32b1
C18D11.6.1	c18d11.6
N.A.	m116.2
T19C3.4.1	t19c3.4
F19F10.4.1, F19F10.4.2	ttr-10
T22C8.6.1	t22c8.6
K08C7.5.1	fmo-2
K08C7.2.1, K08C7.2.2, K08C7.2.3, K08C7.2.4	fmo-1
F41C3.3.1, F41C3.3.2	acs-11
F53F4.5b, F53F4.5a.1	fmo-4
F49E11.10a.1, F49E11.10a.2, F49E11.10b.1	scl-2
Y40B1B.7.1	y40b1b.7
F16C3.2.1	f16c3.2
F56C3.8.1	f56c3.8
W02D7.11.1	w02d7.11
K06A9.1b.1, K06A9.1a.1, K06A9.1c.1	k06a9.1
K06A9.2.1	k06a9.2
Y57G11C.34.1	y57g11c.34
F59F4.2.1	f59f4.2
F37A8.5.1	f37a8.5
B0511.6.1	b0511.6
R10H1.1.1	r10h1.1
T06A10.1b.1, T06A10.1a.1, T06A10.1c.1	mel-46
F17E9.11.1	lys-10
F14D2.7.1	f14d2.7
K03B4.7b.1, K03B4.7a.1	cpg-8
F36F2.2.1	f36f2.2
F36F2.1a.1, F36F2.1b.1, F36F2.1b.2	f36f2.1
F42A10.4a.1, F42A10.4b.1	efk-1
C02F12.4.1	tag-52
W10G6.2a.1, W10G6.2b.1	sgk-1
C24H12.4a.1, C24H12.4b.1, C24H12.4c.1, C24H12.4d.1	c24h12.4
F41E6.5a.1, F41E6.5b.1, F41E6.5b.2	f41e6.5
M163.1.1	m163.1
F36G9.11.1	clec-232
T07A9.9.1, T07A9.9.2, T07A9.9.3	t07a9.9
C52B9.3b.1, C52B9.3a.1	coel-1
C32D5.9.1	lgg-1
ZK593.6b.1, ZK593.6b.2, ZK593.6a.1, ZK593.6a.2	lgg-2
Y105C5A.8b, Y105C5A.8a.1, Y105C5A.8a.2	y105c5a.8
C04A2.1.1, C04A2.1.2	c04a2.1
F58H1.7a.1, F58H1.7b.1	f58h1.7
C31B8.4.1	c31b8.4
W08A12.2a.1, W08A12.2b.1	w08a12.2
F54F3.4.1	f54f3.4
C55F2.2.1	ilys-4
T27D12.1b.1, T27D12.1a.1, T27D12.1a.2	t27d12.1
C45G7.2.1	ilys-2
C45G7.3.1	ilys-3
F57B9.1.1, F57B9.1.2, F57B9.1.3	f57b9.1
C33D9.1b.1, C33D9.1d.1, C33D9.1c.1	exc-5
F54E7.7.1	rcn-1
C33A12.19a.1, C33A12.19b.1	c33a12.19
C02F4.2c.1, C02F4.2b.1, C02F4.2a.1	tax-6
F57H12.7a.1, F57H12.7b.1	mec-17
C04F6.3.1	cht-1
ZK54.2b.1, ZK54.2b.2, ZK54.2b.3, ZK54.2a.1, ZK54.2a.2, ZK54.2a.3, ZK54.2a.4	tps-1
K01F9.2.1	k01f9.2
F19H8.1a.1, F19H8.1b.1	tps-2
F17H10.2a.1, F17H10.2b.1	f17h10.2
F59A1.7.1	fbxa-108
D1037.2.1	smp-2
F47B10.2.1	f47b10.2
B0564.3.1, B0564.3.2	b0564.3
F31D4.4.1	clec-264
F41E6.6.1, F41E6.6.2	tag-196
K12H6.6b, K12H6.6a.1	k12h6.6
R12H7.3.1	skr-19
T27C4.1.1, T27C4.1.2	t27c4.1
C39D10.11a.1, C39D10.11b.1	c39d10.11
Y6E2A.4.1	y6e2a.4
F40F12.7.1, F40F12.7.2, F40F12.7.3, F40F12.7.4	f40f12.7
C33A11.2.1	c33a11.2
Y51A2D.4.1	hmit-1.1
F13C5.1.1, F13C5.1.2	f13c5.1
C09H5.2b, C09H5.2a.1	c09h5.2
T06D8.1a.1, T06D8.1b.1, T06D8.1c.1	t06d8.1
C27H5.2a.1, C27H5.2d.1, C27H5.2b.1, C27H5.2c.1	c27h5.2
F55B11.4.1	f55b11.4
T12B3.3.1	t12b3.3
F44C8.3.1	nhr-18
R03G5.2.1, R03G5.2.2	sek-1
F57F5.4a.1, F57F5.4a.2, F57F5.4a.3, F57F5.4b.1	add-2
C50B8.3.1	c50b8.3
C50B8.4.1	c50b8.4
F45E4.5a.1, F45E4.5c.1, F45E4.5b.1, F45E4.5d.1	f45e4.5
R166.5a.1, R166.5b.1	mnk-1
F21D12.1d.1, F21D12.1a.1, F21D12.1e.1, F21D12.1c.1, F21D12.1c.2, F21D12.1b.1	nhr-21
F02C12.5.1	cyp-13b1
C23G10.11.1, C23G10.11.2	c23g10.11
F30A10.9.1	f30a10.9
ZC410.5a.1, ZC410.5c.1, ZC410.5c.2, ZC410.5c.3, ZC410.5c.4	zc410.5
C36B1.6a.1, C36B1.6b.1	c36b1.6
W01A11.7.1, W01A11.7.2, W01A11.7.3	w01a11.7
C13D9.1.1	srr-6
C06H5.1.1, C06H5.1.2	fbxa-156
C06H5.2.1	fbxa-157
T09A12.2a, T09A12.2b.1	t09a12.2
F13H8.7.1	f13h8.7
K10B3.7.1, K10B3.7.2	gpd-3
K10H10.2.1, K10H10.2.2	k10h10.2
K07B1.6c, K07B1.6d, K07B1.6e, K07B1.6b.1, K07B1.6a.1, K07B1.6a.2	k07b1.6
T23G7.3.1	t23g7.3
F41C3.2.1	f41c3.2
Multiple entries : 2	srp-2
E02H1.1.1, E02H1.1.2	e02h1.1
T07C4.9a.1, T07C4.9b.1, T07C4.9b.2	nex-2
R03E9.1.1	mdl-1
K03E5.2a.1, K03E5.2b.1, K03E5.2d.1, K03E5.2c.1, K03E5.2c.2	k03e5.2
C49G9.2.1	c49g9.2
F26F12.3c.1, F26F12.3a.1, F26F12.3a.2, F26F12.3b.1, F26F12.3b.2	f26f12.3
B0303.11a.1, B0303.11a.2, B0303.11b.1, B0303.11b.2	b0303.11
M176.8.1	m176.8
C33G8.6.1	nhr-42
Y18D10A.23.1	y18d10a.23
F36D3.9.1	cpr-2
F46H5.7c.1, F46H5.7a.1, F46H5.7a.2, F46H5.7b.1, F46H5.7b.2	f46h5.7
C52E4.1.1	cpr-1
F13H8.1a.1, F13H8.1b.1	f13h8.1
W07G4.5.1	w07g4.5
ZK1073.1.1, ZK1073.1.2	zk1073.1
T10H9.8.1	t10h9.8
Y87G2A.16.1	y87g2a.16
F11C7.6a.1, F11C7.6b.1	f11c7.6
C08E3.1.1	c08e3.1
Y54G9A.7.1	y54g9a.7
W07G9.2b.1, W07G9.2c.1, W07G9.2a.1	w07g9.2
Y43F8B.9.1	y43f8b.9
C42D8.1.1, C42D8.1.2, C42D8.1.3	c42d8.1
F54D7.4.1	zig-7
T01G6.7.1	nhr-55
F55F8.2b, F55F8.2a.1	f55f8.2
F56F10.3.1, F56F10.3.2	f56f10.3
Y43F8B.2b.1, Y43F8B.2e.1, Y43F8B.2e.2, Y43F8B.2f.1, Y43F8B.2f.2, Y43F8B.2f.3, Y43F8B.2c.1, Y43F8B.2c.2, Y43F8B.2a.1, Y43F8B.2d.1	y43f8b.2
ZK1193.5b, ZK1193.5c.1, ZK1193.5c.2, ZK1193.5e.1, ZK1193.5e.2, ZK1193.5a.1, ZK1193.5a.2, ZK1193.5d.1, ZK1193.5d.2	dve-1
Y73B6BR.1b.1, Y73B6BR.1a.1	pqn-89
K08B12.2a.1, K08B12.2b.1	k08b12.2
T25B9.7.1, T25B9.7.2	ugt-54
K01A11.2.1	k01a11.2
N.A.	r07c12.2
Y57A10A.14.1	y57a10a.14
C06E4.8.1	c06e4.8
T14B4.4a.1, T14B4.4a.2, T14B4.4a.3, T14B4.4b.1, T14B4.4b.2	tsp-10
F49E2.5j.1, F49E2.5j.2, F49E2.5d.1, F49E2.5d.2, F49E2.5f.1, F49E2.5f.2, F49E2.5c.1, F49E2.5c.2, F49E2.5a.1, F49E2.5a.2, F49E2.5i.1, F49E2.5i.2, F49E2.5k.1, F49E2.5k.2, F49E2.5b.1, F49E2.5b.2, F49E2.5e.1, F49E2.5e.2, F49E2.5g.1, F49E2.5g.2, F49E2.5h.1, F49E2.5h.2	f49e2.5
ZK632.4.1	zk632.4
C24G6.6.1, C24G6.6.2, C24G6.6.3, C24G6.6.4	c24g6.6
T23F2.3.1	t23f2.3
T23F2.4.1	t23f2.4
T04A6.1a.1, T04A6.1b.1	t04a6.1
ZK632.9.1, ZK632.9.2	zk632.9
T01B6.3b.1, T01B6.3a.1	t01b6.3
T23F4.2a.1, T23F4.2b.1, T23F4.2c.1, T23F4.2d.1	t23f4.2
T24H7.2.1	t24h7.2
ZC395.5.1	zc395.5
T21D12.9c.1, T21D12.9c.2, T21D12.9a.1, T21D12.9a.2	t21d12.9
F07F6.8.1	f07f6.8
T20B3.1.1	t20b3.1
D1053.3.1	d1053.3
T28H10.3.1	t28h10.3
C45B2.5.1	gln-1
W02D3.1.1, W02D3.1.2	w02d3.1
Y105C5B.28a.1, Y105C5B.28b.1, Y105C5B.28c.1, Y105C5B.28c.2, Y105C5B.28c.3	gln-3
T28H10.2.1	t28h10.2
K08A2.5a.1, K08A2.5a.2, K08A2.5c.1, K08A2.5c.2	nhr-88
Y69A2AL.2.1	y69a2al.2
W09G3.2.1	w09g3.2
Y75B8A.7.1	y75b8a.7
T26H5.10.1	t26h5.10
C53A3.2.1	c53a3.2
R05A10.4.1	r05a10.4
N.A.	f40h6.6
Y119D3B.20.1	fbxa-92
F55F10.1b.1, F55F10.1a.1	f55f10.1
F18E3.7b, F18E3.7a.1, F18E3.7a.2	f18e3.7
Y54G2A.8a.1, Y54G2A.8b.1	clec-82
Y54G2A.14.1, Y54G2A.14.2, Y54G2A.14.3	clec-83
Y54G2A.33.1, Y54G2A.33.2	clec-84
K08F4.7.1	gst-4
Y15E3A.5.1	y15e3a.5
Y15E3A.4.1	y15e3a.4
F28F8.2.1	acs-2
R12E2.2.1	r12e2.2
D2030.5.1	mce-1
C30G7.1.1	hil-1
T16G1.4.1	t16g1.4
M01A8.1a.1, M01A8.1b.1, M01A8.1c.1	m01a8.1
T16G1.7.1	t16g1.7
M05B5.2.1, M05B5.2.2	m05b5.2
W09G12.7.1	w09g12.7
Y39G10AR.11.1, Y39G10AR.11.2, Y39G10AR.11.3	y39g10ar.11
C52B9.2b.1, C52B9.2b.2, C52B9.2a.1	c52b9.2
C37H5.9c.1, C37H5.9c.2, C37H5.9b.1, C37H5.9a.1	nas-9
ZK792.5.1	zk792.5
C16A3.6.1	c16a3.6
T01C8.1a.1, T01C8.1b.1, T01C8.1c.1, T01C8.1c.2	aak-2
K06A1.5.1	atg-16.2
W02A2.9.1	w02a2.9
D1007.14.1	pqn-24
F23H12.9a.1, F23H12.9b.1	fipr-2
D2007.5.1, D2007.5.2	atg-13
C15A11.7b, C15A11.7a.1	c15a11.7
PAR2.3b.1, PAR2.3a.1, PAR2.3a.2	aak-1
F35C5.8.1, F35C5.8.2	clec-65
F53F1.6a.1, F53F1.6b.1	f53f1.6
K10F12.4b.1, K10F12.4b.2, K10F12.4a.1	gsto-3
C37H5.6b.1, C37H5.6a.1	c37h5.6
ZK666.6.1	clec-60
N.A.	y48e1c.3
C18E9.9.1	c18e9.9
ZK1320.9.1	zk1320.9
F44F4.1.1	f44f4.1
ZK596.1.1	zk596.1
D2024.7.1	gstk-2
F59B10.4a.1, F59B10.4b.1	f59b10.4
Y73F8A.6.1	ccg-1
F56F11.3.1, F56F11.3.2	klf-1
ZK945.1.1	lact-2
F25E5.8b.1, F25E5.8b.2, F25E5.8a.1, F25E5.8a.2	f25e5.8
T06C10.4.1	flp-10
C34D4.14d.1, C34D4.14d.2, C34D4.14a.1, C34D4.14a.2, C34D4.14h.1, C34D4.14f.1, C34D4.14e.1, C34D4.14b.1, C34D4.14b.2, C34D4.14g.1, C34D4.14c.1	c34d4.14
ZK1307.2.1	zk1307.2
ZK525.1.1	flp-15
C46H11.4d.1, C46H11.4c.1, C46H11.4e.1, C46H11.4f.1, C46H11.4b.1, C46H11.4a.1	lfe-2
C17C3.4.1	ins-11
T18D3.7a.1, T18D3.7a.2, T18D3.7b.1, T18D3.7b.2, T18D3.7c.1, T18D3.7c.2	t18d3.7
T03D8.3.1	sbt-1
C05C12.4.1	c05c12.4
W04D2.5.1	w04d2.5
F46C5.1.1	f46c5.1
F29D11.1.1	lrp-1
C14B1.3.1	c14b1.3
F52D1.2e, F52D1.2c.1, F52D1.2b.1, F52D1.2a.1, F52D1.2d.1	f52d1.2
Y51H4A.25c, Y51H4A.25b.1, Y51H4A.25d.1, Y51H4A.25e.1, Y51H4A.25a.1, Y51H4A.25a.2	y51h4a.25
K01A2.2c, K01A2.2a.1, K01A2.2b.1, K01A2.2d.1	far-7
W02A2.2.1	far-6
Y47D3B.7.1	sbp-1
B0218.8.1	clec-52
C17C3.19.1	ins-12
Y39B6A.5a.1, Y39B6A.5b.1	y39b6a.5
ZC8.4b.1, ZC8.4a.1, ZC8.4a.2, ZC8.4e.1, ZC8.4d.1	lfi-1
Y51H4A.15.1	y51h4a.15
D2045.8.1	d2045.8
ZC443.3.1	zc443.3
Y17D7B.4.1, Y17D7B.4.2	y17d7b.4
F53E2.1a.1, F53E2.1b.1	tag-304
F56H9.2a.1, F56H9.2b.1	f56h9.2
F32A11.6.1	moe-3
K02F3.9.1	k02f3.9
C06H5.7.1, C06H5.7.2	c06h5.7
F28G4.1.1	cyp-37b1
C54F6.5.1	c54f6.5
F40G12.5.1	f40g12.5
Multiple entries : 2	zk1290.5
F22H10.3.1	f22h10.3
F11A5.10.1, F11A5.10.2	glc-1
F21C10.10.1, F21C10.10.2	f21c10.10
F01D5.9.1, F01D5.9.2	cyp-37a1
K07E3.4a.1, K07E3.4b.1	k07e3.4
C50F7.5.1	c50f7.5
W09C5.1.1	w09c5.1
F27E5.1.1	f27e5.1
H22K11.2.1	h22k11.2
Y65B4BR.1.1	y65b4br.1
R11G1.6b.1, R11G1.6c.1, R11G1.6a.1, R11G1.6d.1	r11g1.6
C48E7.10.1	spp-15
F10E9.12.1	f10e9.12
W06D4.1.1	hgo-1
F56D5.6a.1, F56D5.6c.1, F56D5.6b.1	f56d5.6
B0454.6.1	b0454.6
F54D10.2.1	fbxa-24
C03H5.1.1, C03H5.1.2, C03H5.1.3	clec-10
F26D12.1c, F26D12.1d, F26D12.1k.1, F26D12.1g.1, F26D12.1a.1, F26D12.1j.1, F26D12.1h.1, F26D12.1h.2, F26D12.1m.1, F26D12.1m.2, F26D12.1l.1, F26D12.1l.2, F26D12.1b.1, F26D12.1b.2, F26D12.1n.1, F26D12.1o.1, F26D12.1e.1, F26D12.1i.1, F26D12.1f.1, F26D12.1p.1	fkh-7
W07B8.4a.1, W07B8.4b.1	w07b8.4
H16O14.1a.1, H16O14.1d.1, H16O14.1b.1, H16O14.1c.1, H16O14.1e.1	kcc-2
F27E5.7.1	f27e5.7
Y71F9B.9b.1, Y71F9B.9a.1	y71f9b.9
R11G1.4a.1, R11G1.4b.1	sax-1
Multiple entries : 2	twk-18
B0213.5.1	nlp-30
B0213.6.1	nlp-31
B0213.17.1	nlp-34
F54C9.1.1, F54C9.1.2	iff-2
F10G7.1.1, F10G7.1.2	tag-151
T06E4.6.1	col-146
K02D7.1b.1, K02D7.1a.1, K02D7.1a.2	k02d7.1
B0213.4.1	nlp-29
B0213.3.1	nlp-28
W08D2.4a.1, W08D2.4d.1, W08D2.4d.2, W08D2.4b.1, W08D2.4b.2, W08D2.4c.1	fat-3
Y67H2A.8.1	fat-1
Y48B6A.6a.1, Y48B6A.6a.2, Y48B6A.6b.1, Y48B6A.6c.1	y48b6a.6
F38B7.3.1	f38b7.3
C27B7.9.1	c27b7.9
F38B7.1a.1, F38B7.1b.1	f38b7.1
W02D7.2.1	clec-218
C43G2.1b.1, C43G2.1c.1, C43G2.1c.2, C43G2.1a.1, C43G2.1a.2, C43G2.1a.3	c43g2.1
F10D7.3.1	f10d7.3
F55B12.5.1, F55B12.5.2	nrf-5
F11A5.9.1	f11a5.9
M02D8.6.1	m02d8.6
K05F6.10.1	k05f6.10
VK10D6R.1.1	cnc-10
Y76A2B.5.1, Y76A2B.5.2	y76a2b.5
AC3.5a.1, AC3.5a.2, AC3.5b.1	ac3.5
R09B5.13.1	cnc-11
M02D8.4b.1, M02D8.4c.1, M02D8.4a.1	m02d8.4
F08F1.4b.1, F08F1.4a.1	f08f1.4
F47B8.8.1	f47b8.8
T12B5.8.1	fbxa-59
F47B8.4a.1, F47B8.4b.1	f47b8.4
F47B8.3.1	f47b8.3
F38E11.2.1	hsp-12.6
M01D7.5.1	nlp-12
T07D1.2.1, T07D1.2.2	t07d1.2
F47B8.2.1	f47b8.2
F37A8.4.1	nlp-10
T10B5.7a.1, T10B5.7b.1	t10b5.7
C50F2.10.1	abf-2
F53F10.4b.1, F53F10.4a.1, F53F10.4c.1, F53F10.4d.1, F53F10.4d.2	unc-108
F38E11.1.1	hsp-12.3
R10E9.1.1	msi-1
Multiple entries : 2	twk-1
F32H5.3a.1, F32H5.3b.1	f32h5.3
F23H12.1.1, F23H12.1.2	snb-2
F43C11.7.1	f43c11.7
ZK337.1a.1, ZK337.1a.2, ZK337.1a.3, ZK337.1b.1, ZK337.1b.2, ZK337.1c.1, ZK337.1c.2	zk337.1
T12B5.10.1	fbxa-60
T13F2.1a.1, T13F2.1a.2, T13F2.1b.1, T13F2.1c.1, T13F2.1c.2, T13F2.1c.3	fat-4
F45E4.8.1, F45E4.8.2	nlp-20
F18G5.6.1	f18g5.6
T08B6.9.1	t08b6.9
T12A7.6.1, T12A7.6.2	t12a7.6
Y53H1B.2.1	y53h1b.2
Y45F10A.5.1	nlp-17
M01B12.5b, M01B12.5a.1, M01B12.5a.2	m01b12.5
T11B7.3b.1, T11B7.3a.1	col-118
Y46H3A.3a.1, Y46H3A.3b.1	hsp-16.2
C18E9.1.1	cal-2
T27E4.8.1	hsp-16.1
K01G5.9.1, K01G5.9.2, K01G5.9.3	k01g5.9
F59A6.1a.1, F59A6.1b.1	nsy-1
DY3.6.1	mfb-1
F59A7.2.1	f59a7.2
F58B3.2.1	lys-5
Y22F5A.6.1	lys-3
H01A20.1.1	nhr-3
C25H3.10b.1, C25H3.10a.1	c25h3.10
ZK1128.7.1, ZK1128.7.2	zk1128.7
F43G6.8.1	f43g6.8
Y48G10A.3.1	y48g10a.3
K03H1.5.1	k03h1.5
T01D3.6a.1, T01D3.6b.1	t01d3.6
Y73E7A.2.1	y73e7a.2
F54C9.3.1	f54c9.3
F53F10.1.1	f53f10.1
F45D3.3.1	f45d3.3
F45D3.4a.1, F45D3.4a.2, F45D3.4b.1, F45D3.4b.2	f45d3.4
C54G6.5.1, C54G6.5.2	spp-17
C06B3.6.1, C06B3.6.2	c06b3.6
C16A3.3.1	let-716
K04F1.9a.1, K04F1.9b.1	k04f1.9
F35E12.6.1, F35E12.6.2, F35E12.6.3	f35e12.6
ZK673.2.1	zk673.2
R09B5.9.1	cnc-4
ZK673.1a.1, ZK673.1b.1	zk673.1
F44E5.4.1	f44e5.4
F44E5.5.1, F44E5.5.2	f44e5.5
C14C11.3.1	hex-2
K03H6.7.1	clec-172
T12G3.1a.1, T12G3.1a.2, T12G3.1b.1	t12g3.1
K02C4.5.1	k02c4.5
H13N06.3a.1, H13N06.3b.1	gob-1
C04A11.5.1	c04a11.5
T10G3.1.1	t10g3.1
Y69H2.14.1	y69h2.14
H06H21.8a.1, H06H21.8b.1	h06h21.8
T03G6.3.1	t03g6.3
E01G4.1b.1, E01G4.1a.1	e01g4.1
F49H6.5a.1, F49H6.5b.1	f49h6.5
F14H3.12.1	f14h3.12
R06C1.6.1	r06c1.6
R05D7.1.1, R05D7.1.2	r05d7.1
Y37E11B.5.1	y37e11b.5
K10D3.6.1	k10d3.6
F53B2.8.1	f53b2.8
T08A9.12.1	spp-2
D2030.2a.1, D2030.2a.2, D2030.2a.3, D2030.2b.1, D2030.2b.2, D2030.2b.3, D2030.2b.4	d2030.2
C28C12.5.1	spp-8
DH11.2.1, DH11.2.2	dh11.2
C50H2.13.1	c50h2.13
C32F10.4.1	c32f10.4
R13A5.12.1	lpd-7
C02C2.1.1	tyr-1
Y79H2A.1b.1, Y79H2A.1e.1, Y79H2A.1a.1, Y79H2A.1d.1, Y79H2A.1c.1	brp-1
T07C4.4.1, T07C4.4.2	spp-1
B0546.4b.1, B0546.4a.1, B0546.4c.1, B0546.4c.2, B0546.4c.3	b0546.4
B0546.3a.1, B0546.3c.1, B0546.3b.1	b0546.3
Y22D7AL.15.1	y22d7al.15
Y52B11A.10.1	y52b11a.10
D2096.3.1, D2096.3.2, D2096.3.3	d2096.3
B0563.5.1	b0563.5
K08C7.6.1	k08c7.6
K08C7.4.1	k08c7.4
F52F10.3.1	f52f10.3
K03A1.2b.1, K03A1.2a.1	k03a1.2
K10G9.1.1	k10g9.1
F53E10.1.1	f53e10.1
F53A9.1.1	f53a9.1
C07E3.3b.1, C07E3.3a.1	c07e3.3
C09D4.2.1	c09d4.2
C08B6.10.1	c08b6.10
F08B12.4d.1, F08B12.4f.1, F08B12.4h.1, F08B12.4i.1, F08B12.4b.1, F08B12.4b.2, F08B12.4g.1, F08B12.4c.1, F08B12.4c.2, F08B12.4e.1, F08B12.4a.1	f08b12.4
R10E8.8.1, R10E8.8.2	r10e8.8
C50F7.2.1	clx-1
T07H3.3.1	math-38
F45E1.4.1	f45e1.4
Y48E1B.9b.1, Y48E1B.9b.2, Y48E1B.9a.1	clec-146
Y51A2D.13a.1, Y51A2D.13b.1	y51a2d.13
Y51A2D.14.1, Y51A2D.14.2	y51a2d.14
T19C4.5a.1, T19C4.5b.1	t19c4.5
F58H7.2.1	f58h7.2
R11H6.4a.1, R11H6.4c.1, R11H6.4b.1	r11h6.4
C50F4.8.1	c50f4.8
C50F4.9.1	c50f4.9
K11H3.1b.1, K11H3.1d.1, K11H3.1d.2, K11H3.1a.1, K11H3.1c.1, K11H3.1c.2	gpdh-2
F10C1.7c.1, F10C1.7e.1, F10C1.7a.1	ifb-2
T28B8.1.1, T28B8.1.2	t28b8.1
ZK484.1b.1, ZK484.1b.2, ZK484.1b.3, ZK484.1b.4, ZK484.1b.5, ZK484.1a.1	zk484.1
C50F4.1.1, C50F4.1.2	c50f4.1
T05A10.1k.1, T05A10.1m.1, T05A10.1b.1, T05A10.1l.1, T05A10.1j.1, T05A10.1d.1, T05A10.1e.1, T05A10.1a.1, T05A10.1g.1, T05A10.1g.2, T05A10.1f.1, T05A10.1i.1, T05A10.1c.1, T05A10.1h.1	sma-9
T19A6.2a.1, T19A6.2c.1, T19A6.2b.1, T19A6.2b.2, T19A6.2b.3	ngp-1
N.A.	math-47
T07E3.4a.1, T07E3.4b.1	t07e3.4
Y20F4.4b.1, Y20F4.4a.1	y20f4.4
Y20F4.2.1, Y20F4.2.2	y20f4.2
F21D12.3.1, F21D12.3.2	f21d12.3
C35E7.6.1	c35e7.6
T07A9.3.1	kgb-1
R09D1.12.1	r09d1.12
R09D1.11b, R09D1.11a.1	r09d1.11
T04B2.5.1, T04B2.5.2	t04b2.5
F17C11.4b.1, F17C11.4a.1	f17c11.4
N.A.	zk546.3
F22B7.9.1	f22b7.9
C44B7.10.1, C44B7.10.2	c44b7.10
K04G7.3a.1, K04G7.3a.2, K04G7.3b.1	ogt-1
T25F10.3.1, T25F10.3.2	t25f10.3
F38A5.7.1	f38a5.7
F09F7.7b.1, F09F7.7a.1	f09f7.7
F53C3.6b, F53C3.6a.1	f53c3.6
F09F7.6.1	f09f7.6
Y53C12B.2.1, Y53C12B.2.2	y53c12b.2
Y53C12B.7.1	y53c12b.7
ZK550.6.1	zk550.6
W01F3.2.1	w01f3.2
F40F8.7.1, F40F8.7.2	pqm-1
F55H12.2.1	f55h12.2
Y46E12BL.4b.1, Y46E12BL.4f.1, Y46E12BL.4f.2, Y46E12BL.4a.1, Y46E12BL.4e.1, Y46E12BL.4g.1, Y46E12BL.4c.1, Y46E12BL.4h.1, Y46E12BL.4d.1	y46e12bl.4
C03D6.8.1	rpl-24.2
C49F5.7.1	c49f5.7
F36H5.2a.1, F36H5.2a.2, F36H5.2a.3, F36H5.2a.4, F36H5.2b.1, F36H5.2b.2, F36H5.2d.1, F36H5.2d.2, F36H5.2d.3, F36H5.2c.1, F36H5.2c.2, F36H5.2c.3	math-27
F36H5.1.1	math-26
F53A9.2.1	f53a9.2
F53A9.8.1	f53a9.8
F53A9.7.1	f53a9.7
F53A9.6.1, F53A9.6.2	f53a9.6
T26H5.9a.1, T26H5.9b.1	t26h5.9
B0416.7b.1, B0416.7a.1	b0416.7
Y51H4A.8.1	y51h4a.8
Y62E10A.16.1	gcl-1
Y51H4A.7.1, Y51H4A.7.2	y51h4a.7
F52H3.5.1	f52h3.5
B0244.2.1	ida-1
Y38E10A.25.1	y38e10a.25
R07B7.5.1	r07b7.5
C25F9.12.1	c25f9.12
C15C8.3a.1, C15C8.3b.1, C15C8.3b.2	c15c8.3
C25F9.11.1	c25f9.11
ZK622.3c, ZK622.3d.1, ZK622.3d.2, ZK622.3d.3, ZK622.3d.4, ZK622.3d.5, ZK622.3d.6, ZK622.3d.7, ZK622.3a.1, ZK622.3a.2, ZK622.3a.3, ZK622.3b.1, ZK622.3b.2	pmt-1
R05G6.10d.1, R05G6.10c.1, R05G6.10b.1, R05G6.10e.1, R05G6.10a.1	r05g6.10
Y48A6B.7.1	y48a6b.7
C44C8.6.1, C44C8.6.2	mak-2
F28A12.4.1, F28A12.4.2	f28a12.4
F13E6.4.1	f13e6.4
F11C7.5.1, F11C7.5.2	osm-11
Y54E10BR.4.1	y54e10br.4
Y95B8A.6c.1, Y95B8A.6d.1, Y95B8A.6a.1, Y95B8A.6a.2, Y95B8A.6b.1, Y95B8A.6b.2	y95b8a.6
Y69A2AR.7a.1, Y69A2AR.7b.1, Y69A2AR.7b.2, Y69A2AR.7b.3, Y69A2AR.7c.1, Y69A2AR.7c.2, Y69A2AR.7c.3	y69a2ar.7
Y10G11A.2a.1, Y10G11A.2b.1	dlc-3
Y69A2AR.5.1	y69a2ar.5
F32D8.12b.1, F32D8.12b.2, F32D8.12c.1, F32D8.12c.2, F32D8.12c.3, F32D8.12a.1, F32D8.12a.2	f32d8.12
C34D10.2b.1, C34D10.2b.2, C34D10.2a.1, C34D10.2a.2	c34d10.2
C07B5.5.1	nuc-1
C34D10.1.1	c34d10.1
F08F1.8.1	tth-1
ZK353.2.1	zk353.2
C08F1.4b.1, C08F1.4b.2, C08F1.4b.3, C08F1.4a.1, C08F1.4a.2, C08F1.4a.3	math-3
B0222.9.1	b0222.9
C02F5.7a.1, C02F5.7a.2, C02F5.7a.3, C02F5.7a.4, C02F5.7b.1, C02F5.7b.2, C02F5.7b.3	c02f5.7
R11.1.1	r11.1
C02F5.3.1	c02f5.3
T05F1.11.1	t05f1.11
T21E12.4a.1, T21E12.4a.2, T21E12.4b.1	dhc-1
Y58A7A.3.1, Y58A7A.3.2	y58a7a.3
C49C8.5.1, C49C8.5.2	c49c8.5
F45H7.4.1, F45H7.4.2	prk-2
T23E7.6.1	t23e7.6
R02F2.1a.1, R02F2.1a.2, R02F2.1a.3, R02F2.1c.1, R02F2.1c.2, R02F2.1b.1, R02F2.1b.2, R02F2.1b.3, R02F2.1d.1, R02F2.1d.2	r02f2.1
N.A.	f39e9.7
Y41C4A.16.1	col-95
VC5.2.1, VC5.2.2	vc5.2
F55B12.10.1	f55b12.10
Y38E10A.16.1	y38e10a.16
W01B11.6.1, W01B11.6b:wp251	w01b11.6
C45G9.6b.1, C45G9.6a.1	c45g9.6
F11E6.11a.1, F11E6.11a.2, F11E6.11b.1	f11e6.11
T23E7.4b.1, T23E7.4a.1, T23E7.4a.2	nlp-6
C26E1.2b.1, C26E1.2a.1	c26e1.2
W03G1.7b.1, W03G1.7a.1	asm-3
M04G12.2.1	cpz-2
C33A12.4.1, C33A12.4.2	c33a12.4
Y41G9A.10.1	y41g9a.10
T19D12.2a.1, T19D12.2a.2, T19D12.2c.1, T19D12.2c.2, T19D12.2c.3, T19D12.2b.1, T19D12.2b.2	t19d12.2
Y75B8A.29.1	y75b8a.29
C28G1.6.1	c28g1.6
R31.2a.1, R31.2b.1, R31.2b.2, R31.2d.1, R31.2c.1	r31.2
Y39B6A.33.1	y39b6a.33
F35D11.3.1, F35D11.3.2	f35d11.3
Y39B6A.40b.1, Y39B6A.40c.1, Y39B6A.40d.1, Y39B6A.40d.2, Y39B6A.40a.1	y39b6a.40
T24B8.4b.1, T24B8.4a.1, T24B8.4c.1, T24B8.4c.2, T24B8.4d.1, T24B8.4d.2, T24B8.4d.3	t24b8.4
F13C5.6b.1, F13C5.6a.1	unc-96
F09B9.1b.1, F09B9.1a.1	f09b9.1
K04C2.3a.1, K04C2.3b.1, K04C2.3b.2	k04c2.3
B0218.1.1, B0218.1.2, B0218.1.3, B0218.1.4	b0218.1
Y46G5A.21.1, Y46G5A.21.2	acl-7
F25E2.4.1	ifd-2
B0252.2.1, B0252.2.2	asm-1
B0379.1b, B0379.1a.1	b0379.1
T23F11.1.1, T23F11.1.2, T23F11.1.3	t23f11.1
Y43B11AR.3.1	y43b11ar.3
C25G4.2.1, C25G4.2.2	c25g4.2
Y94H6A.6.1	ubc-8
W06D4.4.1	w06d4.4
F26A3.1.1	f26a3.1
C34F11.3b.1, C34F11.3c.1, C34F11.3a.1, C34F11.3d.1	c34f11.3
ZK970.7.1	zk970.7
Y77E11A.1a.1, Y77E11A.1a.2, Y77E11A.1b.1, Y77E11A.1b.2, Y77E11A.1b.3, Y77E11A.1b.4, Y77E11A.1c.1, Y77E11A.1c.2, Y77E11A.1c.3	y77e11a.1
K05F1.10.1	k05f1.10
C35B1.1.1	ubc-1
F43G6.11.1	f43g6.11
K03E6.7.1	k03e6.7
C34C6.7a.1, C34C6.7b.1	c34c6.7
Y39A3CL.6.1	pvf-1
E04F6.8.1	e04f6.8
E04F6.9.1	e04f6.9
C49A9.5.1	c49a9.5
C49A9.6.1	c49a9.6
R151.5b, R151.5a.1	dpy-31
C38C3.4a, C38C3.4b.1	c38c3.4
H20J04.4a.1, H20J04.4b.1, H20J04.4b.2	h20j04.4
Y82E9BR.23a.1, Y82E9BR.23b.1	y82e9br.23
W02C12.3g.1, W02C12.3g.2, W02C12.3g.3, W02C12.3d.1, W02C12.3h.1, W02C12.3h.2, W02C12.3i.1, W02C12.3a.1, W02C12.3a.2, W02C12.3a.3, W02C12.3j.1, W02C12.3e.1, W02C12.3c.1, W02C12.3b.1, W02C12.3f.1	hlh-30
T09A5.1b.1, T09A5.1a.1	cex-2
F31F7.1a.1, F31F7.1b.1, F31F7.1b.2, F31F7.1c.1	f31f7.1
Y82E9BR.21.1	y82e9br.21
JC8.14.1	ttr-45
F49E12.10.1	f49e12.10
F40F4.3.1, F40F4.3.2	lbp-1
T23B12.8b.1, T23B12.8a.1, T23B12.8a.2	t23b12.8
C12C8.1.1	hsp-70
F31F4.12.1	nhr-180
F40E10.3.1	csq-1
C37A5.8.1	fipr-24
C37A5.2.1	fipr-22
C37A5.4.1	fipr-23
T19H5.4b.1, T19H5.4b.2, T19H5.4a.1	t19h5.4
R04B5.5.1	r04b5.5
ZK863.8.1	zk863.8
F53B6.8.1	fipr-26
ZK971.1.1	zk971.1
F36A4.10.1	col-34
W02D7.8.1	w02d7.8
F07E5.5.1	f07e5.5
ZK688.11.1	zk688.11
R102.5a.1, R102.5b.1	r102.5
ZK945.3.1	puf-12
B0496.7.1	valv-1
F21E9.3.1	ttr-37
M60.4b.1, M60.4b.2, M60.4b.3, M60.4a.1	m60.4
F57G8.6.1	nhr-193
C35A5.6a.1, C35A5.6b.1	c35a5.6
C46C2.1b.1, C46C2.1k.1, C46C2.1k.2, C46C2.1e.1, C46C2.1e.2, C46C2.1r.1, C46C2.1o.1, C46C2.1o.2, C46C2.1q.1, C46C2.1q.2, C46C2.1s.1, C46C2.1d.1, C46C2.1d.2, C46C2.1m.1, C46C2.1p.1, C46C2.1p.2, C46C2.1g.1, C46C2.1a.1, C46C2.1n.1, C46C2.1n.2, C46C2.1t.1, C46C2.1j.1, C46C2.1j.2, C46C2.1h.1, C46C2.1l.1, C46C2.1c.1, C46C2.1f.1, C46C2.1i.1, C46C2.1u.1, C46C2.1v.1	wnk-1
C09G5.4.1	col-39
Y41C4A.13.1	y41c4a.13
M05D6.7.1	gbh-2
Y47D3A.32b.1, Y47D3A.32d.1, Y47D3A.32c.1, Y47D3A.32a.1	y47d3a.32
Y105C5A.24.1	y105c5a.24
F58A4.7a.1, F58A4.7a.2, F58A4.7c.1, F58A4.7c.2, F58A4.7b.1, F58A4.7b.2, F58A4.7b.3, F58A4.7d.1, F58A4.7d.2	hlh-11
F46B6.7.1, F46B6.7.2	ztf-7
C35A5.3.1	c35a5.3
Y43E12A.2.1	y43e12a.2
C53B7.3c.1, C53B7.3a.1, C53B7.3b.1, C53B7.3d.1, C53B7.3d.2	c53b7.3
F46B6.8.1	f46b6.8
F13D11.3.1	f13d11.3
F53C11.9.1	f53c11.9
C44H9.5b.1, C44H9.5a.1	c44h9.5
R07E5.10.1	pdcd-2
JC8.8.1	ttr-51
F15H10.1.1, F15H10.1.2	col-12
F28E10.2b.1, F28E10.2a.1	f28e10.2
Y49E10.16a.1, Y49E10.16b.1	y49e10.16
Y105C5A.12.1	y105c5a.12
Y105C5A.13a.1, Y105C5A.13b.1	y105c5a.13
T14G10.4.1	ttr-54
Multiple entries : 2	atg-2
ZK637.13.1	glb-1
C10G11.5a.1, C10G11.5b.1, C10G11.5c.1, C10G11.5c.2	pnk-1
Y54G2A.11b.1, Y54G2A.11a.1	y54g2a.11
ZK1290.13.1	zk1290.13
F15D4.2.1	f15d4.2
B0403.6.1	b0403.6
F55H2.1a.1, F55H2.1b.1	sod-4
ZC168.5.1	grl-21
F36D1.4.1	f36d1.4
T04F8.7a.1, T04F8.7b.1	t04f8.7
F14B8.2.1	f14b8.2
F14F4.3.1	mrp-5
D1046.5a.1, D1046.5b.1	d1046.5
F42G2.2c.1, F42G2.2a.1, F42G2.2b.1	f42g2.2
Y44A6C.1.1	y44a6c.1
F18C5.10.1, F18C5.10.2	f18c5.10
Y105E8B.7.1	y105e8b.7
Y70G10A.3.1, Y70G10A.3.2, Y70G10A.3.3	y70g10a.3
ZK809.8a.1, ZK809.8b.1	zk809.8
K09C4.1a.1, K09C4.1b.1	k09c4.1
F22F4.4.1	f22f4.4
C33B4.4.1	c33b4.4
Y47H9C.1.1	y47h9c.1
R09B5.6.1	hacd-1
C28H8.3.1	c28h8.3
C30A5.2.1	rfs-1
C23H3.7.1	tre-5
Y47D3A.15.1	aakb-2
C07A9.8.1	c07a9.8
F09E5.14.1	f09e5.14
F55F3.1.1, F55F3.1.2	aakb-1
F41G4.8.1	f41g4.8
Y97E10AR.6.1	y97e10ar.6
K07E8.3.1, K07E8.3.2, K07E8.3.3	sdz-24
C14F5.1b.1, C14F5.1a.1	dct-1
K09H9.8.1	k09h9.8
C24B9.9.1	dod-3
F35G2.1a.1, F35G2.1a.2, F35G2.1a.3, F35G2.1b.1, F35G2.1b.2	f35g2.1
Y75B12B.6.1, Y75B12B.6.2	plc-2
F19C7.2.1	f19c7.2
F26D2.2.1	syp-1
ZK512.2b.1, ZK512.2a.1	zk512.2
B0205.7.1	kin-3
F53F4.11.1, F53F4.11.2, F53F4.11.3	f53f4.11
F53F4.14.1, F53F4.14.2	f53f4.14
W05H9.1b.1, W05H9.1a.1	w05h9.1
ZK669.3.1	zk669.3
W05H9.3	w05h9.3
Y48G8AL.13a.1, Y48G8AL.13a.2, Y48G8AL.13a.3, Y48G8AL.13b.1, Y48G8AL.13b.2, Y48G8AL.13b.3	y48g8al.13
Y59H11AR.2a.1, Y59H11AR.2a.2, Y59H11AR.2b.1	y59h11ar.2
H36L18.2	h36l18.2
F08G2.1.1	his-44
F56D1.3.1	f56d1.3
Y37D8A.16.1	y37d8a.16
F48D6.4b.1, F48D6.4c.1, F48D6.4a.1	f48d6.4
C04F12.3.1	ikb-1
K03B4.2.1, K03B4.2.2	k03b4.2
H12C20.6b, H12C20.6a.1	nhr-101
Y25C1A.13.1	y25c1a.13
F42C5.10.1	f42c5.10
Y37E11AR.2.1	siah-1
Y75B12B.3.1	y75b12b.3
Y46H3A.2.1	hsp-16.41
K03H1.10.1, K03H1.10.2, K03H1.10.3, K03H1.10.4, K03H1.10.5	k03h1.10
C05D9.9a.1, C05D9.9b.1	c05d9.9
T27E4.3.1	hsp-16.48
T27E4.9.1	hsp-16.49
T04A8.4b.1, T04A8.4a.1	tag-243
C06G3.1a.1, C06G3.1a.2, C06G3.1b.1, C06G3.1b.2	nhr-105
Y56A3A.18.1	y56a3a.18
F25E2.3.1	f25e2.3
T24H7.5a.1, T24H7.5c.1, T24H7.5c.2, T24H7.5b.1	tat-4
K10G4.3.1	k10g4.3
Y34F4.1b.1, Y34F4.1a.1	y34f4.1
Y71F9AL.10.1	y71f9al.10
F49D11.10.1, F49D11.10.2	f49d11.10
F55C12.7.1, F55C12.7.2, F55C12.7.3	tag-234
C25F9.7.1	srw-86
C15H9.1.1	nnt-1
K01H12.1a.1, K01H12.1b.1	k01h12.1
ZK688.7.1	zk688.7
W05G11.6d.1, W05G11.6d.2, W05G11.6c.1, W05G11.6c.2, W05G11.6a.1, W05G11.6a.2, W05G11.6b.1, W05G11.6b.2, W05G11.6b.3	w05g11.6
Y105E8A.12b.1, Y105E8A.12a.1	catp-1
T12D8.5b, T12D8.5a.1	t12d8.5
ZK688.2.1	zk688.2
C18B12.4.1	c18b12.4
T04C4.1c.1, T04C4.1a.1, T04C4.1b.1	t04c4.1
F25H2.1.1	tli-1
F46A8.7.1	f46a8.7
C08G9.1.1	c08g9.1
R11G11.14.1	r11g11.14
T05C1.4c.1, T05C1.4b.1, T05C1.4a.1	t05c1.4
ZK484.2a.1, ZK484.2a.2, ZK484.2b.1, ZK484.2b.2	haf-9
B0001.6.1, B0001.6.2	b0001.6
R11A5.3.1	r11a5.3
B0361.9.1	b0361.9
T02C5.1a.1, T02C5.1b.1	t02c5.1
T28F4.5.1, T28F4.5.2	t28f4.5
F44C8.2.1, F44C8.2.2	nhr-134
K01A2.10a.1, K01A2.10b.1, K01A2.10b.2	k01a2.10
F34H10.3.1, F34H10.3.2, F34H10.3.3	f34h10.3
F45E1.6.1	his-71
F40F8.5h.1, F40F8.5h.2, F40F8.5j.1, F40F8.5j.2, F40F8.5g.1, F40F8.5g.2, F40F8.5a.1, F40F8.5a.2, F40F8.5f.1, F40F8.5f.2, F40F8.5d.1, F40F8.5d.2, F40F8.5i.1, F40F8.5i.2, F40F8.5e.1, F40F8.5e.2, F40F8.5b.1, F40F8.5b.2, F40F8.5c.1, F40F8.5c.2	f40f8.5
R01E6.3b.1, R01E6.3a.1	cah-4
C46H11.2.1	c46h11.2
T19E7.6.1, T19E7.6.2	t19e7.6
F28D1.5.1, F28D1.5.2	thn-2
C42D4.1.1, C42D4.1.2	c42d4.1
C06G3.3.1	c06g3.3
C30G7.4.1, C30G7.4.2	c30g7.4
C06G3.5a.1, C06G3.5b.1	c06g3.5
C06G3.6.1	c06g3.6
N.A.	t28f4.6
C11D2.3.1	c11d2.3
F59E11.7a.1, F59E11.7b.1	f59e11.7
F59E11.5.1, F59E11.5.2	f59e11.5
F53B7.7.1	f53b7.7
K02A11.3.1	k02a11.3
T23D8.3.1, T23D8.3.2	t23d8.3
K02A11.4.1	k02a11.4
C54F6.12.1	c54f6.12
W06E11.2.1	tag-267
ZC204.12.1	zc204.12
C14C10.3c.1, C14C10.3a.1, C14C10.3b.1	ril-2
Y43C5A.3.1	y43c5a.3
Y48C3A.18a.1, Y48C3A.18b.1, Y48C3A.18c.1	y48c3a.18
ZK131.11b.1, ZK131.11a.1	zk131.11
Y49F6B.12.1	y49f6b.12
F38E9.1.1	f38e9.1
Y43F8C.3.1	y43f8c.3
ZK131.9.1	his-15
Y55B1BL.1c, Y55B1BL.1a.1, Y55B1BL.1b.1	y55b1bl.1
K12B6.9.1	k12b6.9
F10G2.1.1, F10G2.1.2	f10g2.1
D1086.2b.1, D1086.2a.1	d1086.2
K12G11.3.1	sodh-1
F21A3.2.1	f21a3.2
W06H8.6.1, W06H8.6.2	w06h8.6
T28B4.3.1	ttr-6
C40H1.5.1	ttr-5
F42A10.1.1, F42A10.1.2, F42A10.1.3	abcf-3
T27E9.7.1, T27E9.7.2	abcf-2
D1086.5.1	d1086.5
C17B7.4.1	c17b7.4
T07G12.5c.1, T07G12.5b.1, T07G12.5a.1	t07g12.5
C54F6.14.1, C54F6.14.2	ftn-1
C35C5.8a.1, C35C5.8b.1	c35c5.8
D1037.3.1, D1037.3.2	ftn-2
C35C5.9.1, C35C5.9.2	c35c5.9
W07E11.1a.1, W07E11.1b.1	w07e11.1
C25E10.9.1	swm-1
W02B12.9.1	w02b12.9
Y50D4A.5.1	y50d4a.5
Y22D7AR.6.1, Y22D7AR.6.2	y22d7ar.6
Y57G11B.2a.1, Y57G11B.2b.1	y57g11b.2
F13G3.6.1	f13g3.6
C51F7.1.1	frm-7
C50F4.7.1	his-37
F29C6.1a.1, F29C6.1b.1, F29C6.1b.2	f29c6.1
C06G8.3a, C06G8.3c.1, C06G8.3b.1, C06G8.3b.2	c06g8.3
ZK1248.16.1, ZK1248.16.2	lec-5
C31H5.4.1	c31h5.4
C40H1.7a.1, C40H1.7b.1	c40h1.7
Y54G2A.52.1	y54g2a.52
F52H3.7b.1, F52H3.7b.2, F52H3.7a.1, F52H3.7a.2	lec-2
C54F6.15.1	c54f6.15
C08E3.13.1, C08E3.13.2	c08e3.13
K12F2.1.1	myo-3
N.A.	f45e1.3
R74.1.1, R74.1.2	lrs-1
Y55B1BR.4.1	tag-117
N.A.	c44h9.8
C14A4.1.1	tag-242
C37C3.6c.1, C37C3.6c.2, C37C3.6a.1, C37C3.6a.2, C37C3.6a.3, C37C3.6b.1, C37C3.6b.2	ppn-1
F31D5.3d.1, F31D5.3a.1, F31D5.3b.1, F31D5.3c.1	tag-149
C37C3.8a.1, C37C3.8a.2, C37C3.8b.1, C37C3.8b.2, C37C3.8c.1	tag-253
N.A.	c30g4.7
F56B6.4a.1, F56B6.4c.1, F56B6.4b.1	uvt-5
N.A.	t18d3.8
R10E4.2p.1, R10E4.2p.2, R10E4.2c.1, R10E4.2e.1, R10E4.2d.1, R10E4.2f.1, R10E4.2f.2, R10E4.2f.3, R10E4.2f.4, R10E4.2a.1, R10E4.2a.2, R10E4.2a.3, R10E4.2a.4, R10E4.2b.1, R10E4.2b.2, R10E4.2r.1, R10E4.2i.1, R10E4.2i.2, R10E4.2g.1, R10E4.2g.2, R10E4.2j.1, R10E4.2m.1, R10E4.2m.2, R10E4.2q.1, R10E4.2k.1, R10E4.2o.1, R10E4.2n.1, R10E4.2n.2, R10E4.2n.3, R10E4.2n.4, R10E4.2l.1, R10E4.2l.2	tag-310
F20D1.10.1, F20D1.10.2, F20D1.10.3	tag-299
not found	f59a3.5
N.A.	h16o14.2
N.A.	k07b1.8
N.A.	y111b2a.28
C05E4.9b.1, C05E4.9a.1, C05E4.9a.2	gei-7

## Sheet: Engelmann et al., 2011
Gene list from Engelmann et al., 2011 obtained upon S. marsescens exposure used for the comparison with upregulated nhr-14(tm1473) genes at log fold change > 1
Gene ID	Gene name
AH10.1	acs-10
AH10.3	AH10.3
AH6.10	sra-6
AH6.7	sra-3
B0024.1	col-149
B0024.15	B0024.15
B0024.4	B0024.4
B0034.4	B0034.4
B0035.13	B0035.13
B0035.2	dnj-2
B0035.8	his-48
B0205.4	B0205.4
B0213.12	cyp-34A7
B0218.2	faah-2
B0218.6	clec-51
B0222.4	spl-2
B0222.7	col-145
B0222.9	gad-3
B0244.10	B0244.10
B0252.5	B0252.5
B0280.4	odd-1
B0281.1	B0281.1
B0281.3	B0281.3
B0281.6	B0281.6
B0286.3	pacs-1
B0302.5	B0302.5
B0303.8	sdz-1
B0304.3	cyp-23A1
B0310.5	ugt-46
B0336.11	hpo-28
B0344.2	wrt-9
B0365.5	clec-225
B0365.6	clec-41
B0393.4	B0393.4
B0393.5	B0393.5
B0395.2	mboa-1
B0399.2	oac-1
B0403.5	B0403.5
B0412.1	dac-1
B0416.4	B0416.4
B0454.8	B0454.8
B0491.2	sqt-1
B0495.4	nhx-2
B0496.4	B0496.4
B0507.7	B0507.7
B0554.6	dod-20
BE10.2	agmo-1
C01B10.10	C01B10.10
C01B10.11	C01B10.11
C01B10.4	C01B10.4
C01B10.6	C01B10.6
C01B12.1	Multiple entries : 2
C01B12.8	C01B12.8
C01B7.3	C01B7.3
C01B9.1	C01B9.1
C01F1.3	C01F1.3
C01F1.5	C01F1.5
C01F6.6	nrfl-1
C01G10.17	C01G10.17
C01G10.4	C01G10.4
C01G10.5	C01G10.5
C01G5.9	C01G5.9
C01G6.7	acs-7
C01H6.1	col-61
C01H6.4	C01H6.4
C01H6.8	C01H6.8
C02B4.1	adt-1
C02B8.5	frpr-1
C02C2.4	slc-17.3
C02D4.1	jud-4
C02D5.1	acdh-6
C02E7.2	srh-21
C02F4.4	C02F4.4
C02F5.11	tsp-2
C02F5.14	C02F5.14
C02F5.8	tsp-1
C02G6.1	C02G6.1
C02H6.2	fbxa-105
C03B1.14	C03B1.14
C03B1.2	C03B1.2
C03B8.3	C03B8.3
C03D6.1	C03D6.1
C03E10.3	C03E10.3
C03E10.5	clec-223
C03F11.3	scav-1
C03G6.18	srp-5
C03G6.19	srp-6
C04E12.5	C04E12.5
C04F1.1	C04F1.1
C04F12.7	C04F12.7
C04F5.7	ugt-63
C04G2.9	C04G2.9
C04G6.1	mpk-2
C05A9.1	pgp-5
C05B5.5	C05B5.5
C05C10.4	pho-11
C05C12.3	gtl-1
C05C12.4	C05C12.4
C05C8.7	C05C8.7
C05D11.6	nas-4
C05D12.3	C05D12.3
C05D12.4	C05D12.4
C05D12.5	C05D12.5
C05D2.4	bas-1
C05D2.8	C05D2.8
C05D9.2	lmp-2
C05E11.5	amt-4
C05E11.7	C05E11.7
C05E7.2	C05E7.2
C06B3.2	oac-3
C06B3.3	cyp-35C1
C06B3.8	gcy-32
C06B8.1	nhr-150
C06B8.2	C06B8.2
C06C3.6	srh-48
C06E1.3	doxa-1
C06E1.7	C06E1.7
C06E1.8	ztf-30
C06E2.1	C06E2.1
C06E4.3	C06E4.3
C06E7.6	spe-27
C06G1.1	C06G1.1
C06G8.3	zipt-2.1
C06H2.4	folt-1
C06H5.1	fbxa-156
C07A9.11	ncx-7
C07A9.4	ncx-6
C07A9.6	ugt-60
C07A9.8	best-5
C07B5.6	C07B5.6
C07E3.10	C07E3.10
C07E3.5	ceh-57
C07G1.1	svh-1
C07H6.9	C07H6.9
C08B6.11	C08B6.11
C08B6.3	C08B6.3
C08E3.10	fbxa-158
C08F1.4	math-3
C08F1.5	math-4
C08F11.1	C08F11.1
C08F11.13	C08F11.13
C08F11.5	fbxa-98
C08F11.8	ugt-22
C08F8.7	rap-3
C08H9.1	ctsa-3.2
C09B8.4	C09B8.4
C09D1.2	clec-89
C09E7.10	C09E7.10
C09E8.2	lips-7
C09F12.1	clc-1
C09G12.1	ceh-53
C09G5.3	col-79
C09G5.5	col-80
C09G9.3	C09G9.3
C09H5.2	catp-3
C10C5.5	C10C5.5
C10F3.6	fut-8
C10G11.10	C10G11.10
C10G8.3	C10G8.3
C10H11.3	ugt-25
C10H11.4	ugt-28
C11H1.5	C11H1.5
C11H1.9	C11H1.9
C12C8.2	cbl-1
C12D12.1	C12D12.1
C12D12.5	sox-4
C12D8.18	fipr-5
C12D8.5	daf-36
C13C12.2	C13C12.2
C13C4.1	nhr-153
C13C4.6	C13C4.6
C13D9.1	srr-6
C13D9.9	ugt-7
C14A11.5	C14A11.5
C14A6.1	clec-48
C14C11.3	hex-2
C14C11.4	C14C11.4
C14C6.12	C14C6.12
C14C6.2	C14C6.2
C14C6.5	C14C6.5
C14F11.6	C14F11.6
C14H10.3	C14H10.3
C15A11.3	sol-1
C15B12.7	cdf-1
C15C6.1	C15C6.1
C15C7.5	C15C7.5
C15C7.6	C15C7.6
C15C7.7	C15C7.7
C15C8.3	hrg-7
C15C8.4	C15C8.4
C15F1.2	C15F1.2
C15F1.6	art-1
C15H11.1	C15H11.1
C15H11.2	gnrr-2
C15H9.7	kynu-1
C16A3.10	oatr-1
C16C10.13	C16C10.13
C16C4.5	math-15
C16C8.10	C16C8.10
C16C8.2	skpo-2
C16D9.2	rol-3
C16D9.4	C16D9.4
C16D9.5	C16D9.5
C16H3.2	lec-9
C17B7.11	fbxa-65
C17B7.5	C17B7.5
C17B7.8	C17B7.8
C17C3.12	acdh-2
C17C3.15	C17C3.15
C17C3.1	C17C3.1
C17E7.8	nhr-124
C17F4.2	C17F4.2
C17F4.7	C17F4.7
C17G1.2	C17G1.2
C17G1.3	ugt-23
C17G10.5	lys-8
C17H1.3	pals-2
C17H1.5	pals-4
C17H1.6	pals-5
C17H1.7	pals-6
C17H1.9	pals-8
C17H12.12	C17H12.12
C17H12.4	C17H12.4
C17H12.5	C17H12.5
C17H12.6	C17H12.6
C17H12.8	C17H12.8
C18A11.3	C18A11.3
C18B10.6	C18B10.6
C18B2.1	C18B2.1
C18B2.2	C18B2.2
C18B2.5	C18B2.5
C18C4.3	ugt-48
C18D1.2	C18D1.2
C18D11.7	C18D11.7
C18D4.1	C18D4.1
C18D4.2	fbxa-136
C18E9.5	C18E9.5
C18E9.8	C18E9.8
C18E9.9	C18E9.9
C18H7.11	C18H7.11
C18H9.6	C18H9.6
C23G10.6	ugt-66
C23H4.2	C23H4.2
C23H4.3	C23H4.3
C23H4.4	C23H4.4
C23H4.7	C23H4.7
C23H5.1	prmt-6
C23H5.7	che-6
C23H5.8	C23H5.8
C24A11.2	C24A11.2
C24B5.3	ptr-1
C24F3.6	col-124
C24G6.7	grl-1
C24G7.1	delm-2
C24G7.2	acd-1
C24H11.3	tbx-38
C24H12.8	C24H12.8
C25A8.1	C25A8.1
C25A8.5	C25A8.5
C25B8.3	cpr-6
C25D7.4	fbxa-82
C25E10.4	C25E10.4
C25F9.4	C25F9.4
C26B2.2	C26B2.2
C26B2.3	nhr-31
C26B9.2	C26B9.2
C26B9.3	C26B9.3
C26B9.5	C26B9.5
C26B9.7	C26B9.7
C26C6.3	nas-36
C26C6.9	C26C6.9
C26F1.6	frpr-3
C26G2.2	C26G2.2
C27A2.4	pho-12
C27A7.2	C27A7.2
C27D8.1	C27D8.1
C27D8.2	C27D8.2
C27D8.3	C27D8.3
C28C12.4	C28C12.4
C28D4.1	nhr-100
C28G1.1	ubc-23
C28G1.5	rcs-1
C28H8.11	tdo-2
C28H8.5	C28H8.5
C29E4.1	col-90
C29E4.7	gsto-1
C29F3.1	ech-1.1
C29F3.2	wrt-8
C29F3.5	clec-230
C29F3.7	C29F3.7
C29F4.1	col-125
C29F7.1	C29F7.1
C29F9.10	fbxa-57
C29F9.3	pals-23
C29F9.4	pals-24
C30F12.1	rege-1
C30F2.4	C30F2.4
C30F8.3	C30F8.3
C30G12.1	C30G12.1
C30G12.2	C30G12.2
C30G12.3	C30G12.3
C30G12.4	C30G12.4
C30G4.2	C30G4.2
C30H6.1	clec-199
C30H6.2	zipt-17
C30H6.5	C30H6.5
C30H6.8	C30H6.8
C31A11.1	oac-5
C31A11.5	oac-6
C31B8.7	C31B8.7
C31H2.2	dpy-8
C32B5.8	fbxc-6
C32E12.3	osr-1
C32H11.1	irg-6
C32H11.12	dod-24
C32H11.4	C32H11.4
C32H11.5	C32H11.5
C33A12.6	ugt-21
C33B4.2	C33B4.2
C33C12.11	C33C12.11
C33C12.3	gba-1
C33C12.4	C33C12.4
C33C12.7	C33C12.7
C33D3.1	elt-2
C33D3.3	C33D3.3
C33D9.10	C33D9.10
C33D9.3	C33D9.3
C33G3.3	lgc-21
C33G3.5	C33G3.5
C33G8.3	drd-10
C33G8.8	nhr-139
C33H5.2	C33H5.2
C34B4.4	C34B4.4
C34B7.3	cyp-36A1
C34C12.6	C34C12.6
C34D1.5	zip-5
C34D4.3	C34D4.3
C34E10.9	C34E10.9
C34F6.11	C34F6.11
C34F6.3	col-179
C34G6.6	noah-1
C34H4.1	C34H4.1
C34H4.2	C34H4.2
C34H4.3	Multiple entries : 2
C35A11.2	C35A11.2
C35A11.4	C35A11.4
C35A5.3	C35A5.3
C35A5.5	C35A5.5
C35B1.7	C35B1.7
C35C5.2	gcp-2.2
C35D10.15	clec-6
C35D10.5	C35D10.5
C36A4.1	cyp-25A1
C36A4.2	cyp-25A2
C36B7.5	C36B7.5
C36B7.7	hen-1
C36C9.4	C36C9.4
C36H8.1	C36H8.1
C37C3.10	C37C3.10
C37C3.3	vps-32.2
C37E2.2	C37E2.2
C37E2.5	ceh-37
C38C6.3	C38C6.3
C38C6.4	sre-13
C38C6.6	tag-297
C38H2.2	C38H2.2
C39B5.3	fbxa-62
C39D10.6	C39D10.6
C39E9.3	col-131
C39H7.4	C39H7.4
C39H7.9	srsx-16
C40A11.1	math-18
C40A11.8	C40A11.8
C40D2.4	ceh-84
C40H1.4	elo-4
C40H1.7	C40H1.7
C41A3.1	pks-1
C41G6.14	sri-26
C41G7.5	ahr-1
C41G7.6	C41G7.6
C41H7.7	clec-3
C42D4.13	C42D4.13
C42D4.2	C42D4.2
C42D4.3	C42D4.3
C42D8.5	acn-1
C43D7.5	sdz-6
C43F9.10	oac-8
C43F9.11	C43F9.11
C43F9.8	efn-2
C43G2.5	try-3
C43H6.5	C43H6.5
C43H6.6	C43H6.6
C43H6.9	glr-7
C44B11.1	C44B11.1
C44B7.11	C44B7.11
C44B7.5	C44B7.5
C44B7.7	C44B7.7
C44B7.8	pmp-1
C44B7.9	pmp-2
C44C1.5	abhd-3.2
C44C10.1	col-180
C44C10.11	C44C10.11
C44C10.3	C44C10.3
C44F1.1	C44F1.1
C44H4.2	Multiple entries : 2
C44H4.3	sym-1
C44H4.5	tap-1
C44H9.5	C44H9.5
C44H9.6	C44H9.6
C45B11.3	dhs-18
C45B2.7	ptr-4
C45E1.4	C45E1.4
C45E5.1	C45E5.1
C45G7.5	cdh-10
C45G9.10	C45G9.10
C45G9.6	C45G9.6
C45H4.1	srbc-16
C45H4.17	cyp-33C2
C45H4.2	cyp-33C1
C46A5.8	rdl-1
C46C2.6	C46C2.6
C46E1.2	gcy-36
C46E1.3	exc-1
C46F2.1	C46F2.1
C46F4.3	C46F4.3
C46G7.2	C46G7.2
C46G7.4	pqn-22
C47A10.5	ddo-1
C47A4.1	C47A4.1
C47A4.2	ent-4
C47B2.6	gale-1
C47B2.8	prx-11
C47D2.2	cdd-1
C47E12.6	mam-2
C47E12.9	C47E12.9
C48B4.1	acox-1.5
C48B4.12	C48B4.12
C48E7.8	oac-9
C49A9.1	C49A9.1
C49A9.4	C49A9.4
C49A9.5	C49A9.5
C49A9.9	C49A9.9
C49C3.11	C49C3.11
C49C3.4	C49C3.4
C49C3.9	C49C3.9
C49C8.1	C49C8.1
C49C8.5	C49C8.5
C49F5.1	sams-1
C49F5.8	C49F5.8
C49F8.3	C49F8.3
C49G7.7	C49G7.7
C50A2.3	C50A2.3
C50B6.4	col-161
C50B6.8	nhr-168
C50B8.5	C50B8.5
C50C3.5	C50C3.5
C50D2.1	C50D2.1
C50E10.10	sre-51
C50F4.10	C50F4.10
C50F4.3	tag-329
C50F7.5	C50F7.5
C50H11.15	cyp-33C9
C50H2.1	fshr-1
C50H2.4	C50H2.4
C52B9.2	ets-9
C52B9.6	twk-28
C52D10.1	C52D10.1
C52D10.3	C52D10.3
C52E4.5	mans-2
C53A3.2	pgph-3
C53B4.3	C53B4.3
C53B4.7	Multiple entries : 2
C53D5.5	C53D5.5
C53D6.11	C53D6.11
C53D6.6	C53D6.6
C54A12.2	frpr-4
C54C6.6	C54C6.6
C54C8.4	C54C8.4
C54D1.2	clec-86
C54D10.1	cdr-2
C54E4.3	gcy-37
C54F6.12	C54F6.12
C54F6.13	nhx-3
C54F6.14	ftn-1
C54G7.2	mboa-3
C55A6.11	C55A6.11
C55A6.12	C55A6.12
C55A6.4	C55A6.4
C55A6.7	C55A6.7
C55B6.2	dnj-7
C55B7.12	che-1
C55B7.3	C55B7.3
C55B7.4	acdh-1
C55C3.6	C55C3.6
C56C10.4	C56C10.4
C56E10.4	nhr-137
C56E6.2	C56E6.2
C56E6.5	abch-1
D1007.1	ceh-17
D1007.2	col-52
D1007.3	D1007.3
D1009.1	acs-22
D1014.5	D1014.5
D1022.3	D1022.3
D1025.2	gcsh-1
D1025.3	fbxa-141
D1037.2	smp-2
D1037.3	ftn-2
D1044.3	pqn-25
D1053.1	gst-42
D1054.5	D1054.5
D1054.8	D1054.8
D1086.3	D1086.3
D1086.4	Multiple entries : 2
D2013.3	csa-1
D2023.7	col-158
D2024.10	D2024.10
D2024.3	elo-3
D2024.4	D2024.4
D2092.1	mctp-1
D2092.8	D2092.8
D2096.2	praf-3
D2096.3	aagr-1
E01A2.7	poml-2
E02C12.4	ttr-40
E02C12.6	E02C12.6
E02C12.8	E02C12.8
E02H4.5	E02H4.5
E02H9.3	E02H9.3
E02H9.8	nhr-121
E03E2.1	cyp-43A1
E03G2.1	E03G2.1
E03G2.4	col-186
E03H12.5	E03H12.5
E04D5.3	cut-4
E04D5.5	E04D5.5
E04F6.15	E04F6.15
E04F6.3	maoc-1
E04F6.6	E04F6.6
E04F6.7	dhs-7
EGAP2.3	pho-1
EGAP7.1	dpy-3
F01D4.1	ugt-43
F01D4.2	ugt-44
F01D4.6	mec-3
F01D5.1	F01D5.1
F01D5.10	F01D5.10
F01D5.2	F01D5.2
F01D5.3	F01D5.3
F01D5.5	F01D5.5
F01D5.6	F01D5.6
F01E11.5	tyra-2
F01F1.13	Multiple entries : 2
F01G10.10	F01G10.10
F01G10.2	ech-8
F01G10.3	ech-9
F01G10.4	F01G10.4
F01G10.6	F01G10.6
F01G12.2	sur-7
F02A9.1	F02A9.1
F02C12.4	irld-2
F02C12.5	cyp-13B1
F02D10.5	flr-1
F02E11.1	wht-4
F02E11.4	F02E11.4
F02E9.3	F02E9.3
F07A11.1	F07A11.1
F07A11.5	F07A11.5
F07A5.2	F07A5.2
F07B10.1	cln-3.1
F07B7.12	F07B7.12
F07C3.1	ptd-2
F07C6.2	F07C6.2
F07E5.1	fbxb-6
F07F6.5	dct-5
F07F6.9	srx-114
F07G11.4	F07G11.4
F07G6.6	fbxa-52
F07G6.7	fbxa-53
F07H5.9	pho-13
F08A8.1	acox-1.1
F08A8.2	acox-1.2
F08A8.3	acox-1.3
F08A8.4	acox-1.4
F08B12.2	prx-12
F08C6.2	pcyt-1
F08F1.3	F08F1.3
F08F1.6	spp-13
F08F3.3	rhr-1
F08G2.8	F08G2.8
F08G5.4	col-130
F08G5.5	ugt-65
F08G5.6	irg-4
F08G5.7	clec-184
F08H9.6	clec-57
F08H9.7	clec-56
F08H9.8	clec-54
F08H9.9	clec-55
F09A5.2	F09A5.2
F09B12.1	mlt-9
F09B12.3	F09B12.3
F09B12.6	flr-4
F09C12.2	F09C12.2
F09C6.10	F09C6.10
F09C8.1	F09C8.1
F09E5.10	F09E5.10
F09E5.11	F09E5.11
F09F3.9	cpt-5
F09F7.4	hach-1
F09F7.5	F09F7.5
F09F9.2	F09F9.2
F09G2.6	ugt-36
F09G8.5	F09G8.5
F09G8.8	clec-160
F10A3.1	F10A3.1
F10A3.2	fbxa-88
F10A3.3	fbxa-18
F10B5.3	F10B5.3
F10B5.4	tub-1
F10B5.9	tmem-138
F10C1.8	F10C1.8
F10C1.9	F10C1.9
F10C2.7	F10C2.7
F10D11.5	F10D11.5
F10D11.6	F10D11.6
F10D2.1	str-204
F10D2.10	F10D2.10
F10D2.11	ugt-41
F10D2.2	ugt-39
F10D2.8	F10D2.8
F10D2.9	fat-7
F10E7.1	F10E7.1
F10E9.5	F10E9.5
F10F2.3	lips-3
F10F2.5	clec-154
F11A1.2	F11A1.2
F11A5.13	F11A5.13
F11A6.2	scrm-4
F11C1.3	scav-4
F11C7.6	F11C7.6
F11D11.3	F11D11.3
F11D11.6	F11D11.6
F11D5.7	F11D5.7
F11E6.10	F11E6.10
F11E6.3	F11E6.3
F11E6.5	elo-2
F11E6.9	F11E6.9
F11G11.10	col-17
F11G11.12	col-73
F11G11.3	gst-6
F11G11.9	mpst-4
F12D9.1	stg-2
F12E12.4	bath-31
F12E12.9	fbxb-92
F12F6.9	col-128
F13A7.10	gst-44
F13A7.9	skr-11
F13B12.4	F13B12.4
F13B6.1	F13B6.1
F13B6.2	F13B6.2
F13B6.3	F13B6.3
F13D12.6	ctsa-1.2
F13D12.9	F13D12.9
F13E6.5	plpp-1.3
F13E9.10	F13E9.10
F13G3.1	ztf-2
F13G3.3	F13G3.3
F13H10.9	F13H10.9
F13H8.11	F13H8.11
F13H8.3	F13H8.3
F13H8.5	F13H8.5
F14B6.6	F14B6.6
F14B8.5	F14B8.5
F14D7.5	F14D7.5
F14D7.6	F14D7.6
F14E5.1	F14E5.1
F14H3.11	nhr-176
F14H3.3	F14H3.3
F15A2.2	tre-4
F15A2.5	efn-3
F15B9.1	far-3
F15B9.2	far-4
F15B9.3	far-5
F15B9.6	F15B9.6
F15B9.8	F15B9.8
F15E11.12	pud-4
F15E11.15	pud-3
F15E11.4	irld-30
F15E6.5	F15E6.5
F15H10.8	F15H10.8
F16F9.2	dpy-6
F16F9.3	F16F9.3
F16H6.1	clec-42
F17A2.3	phf-32
F17A9.3	atf-8
F17B5.6	F17B5.6
F17C11.11	F17C11.11
F17C11.12	F17C11.12
F17C11.3	col-153
F17C11.5	clec-221
F17C8.7	F17C8.7
F17E9.5	F17E9.5
F18A1.1	F18A1.1
F18C5.5	F18C5.5
F18E2.1	papl-1
F18E9.4	F18E9.4
F18E9.7	F18E9.7
F18F11.4	F18F11.4
F19B2.5	F19B2.5
F19C7.1	F19C7.1
F19C7.2	F19C7.2
F19C7.4	F19C7.4
F19C7.5	F19C7.5
F19C7.6	F19C7.6
F19C7.7	col-110
F19H6.1	nekl-3
F19H6.5	F19H6.5
F19H6.7	F19H6.7
F19H8.2	F19H8.2
F19H8.4	mltn-9
F19H8.5	mltn-10
F20D6.3	srp-8
F20D6.6	F20D6.6
F20G2.1	F20G2.1
F20G2.3	F20G2.3
F20G2.5	F20G2.5
F20G2.6	F20G2.6
F21C10.6	F21C10.6
F21D5.3	F21D5.3
F21F3.2	F21F3.2
F21F8.11	slc-17.5
F21F8.3	asp-5
F21F8.4	asp-12
F21F8.6	F21F8.6
F21H12.7	F21H12.7
F21H7.1	gst-22
F21H7.12	F21H7.12
F21H7.14	srh-98
F21H7.3	F21H7.3
F21H7.4	clec-233
F22A3.1	ets-4
F22A3.6	ilys-5
F22A3.7	ttr-36
F22B3.9	F22B3.9
F22B5.5	F22B5.5
F22D6.15	F22D6.15
F22E10.1	pgp-12
F22E10.2	pgp-13
F22E5.1	F22E5.1
F22E5.4	sri-47
F22F1.3	F22F1.3
F22F4.1	sups-1
F22F4.4	F22F4.4
F22F7.1	ldp-1
F22G12.1	pals-14
F22G12.7	pals-15
F22H10.2	F22H10.2
F22H10.6	F22H10.6
F23A7.5	F23A7.5
F23A7.7	F23A7.7
F23B2.12	pcp-2
F23C8.1	F23C8.1
F23F12.13	F23F12.13
F23F12.3	F23F12.3
F23F12.4	sdz-15
F23H12.4	sqt-3
F23H12.5	F23H12.5
F25A2.1	F25A2.1
F25B4.4	F25B4.4
F25C8.1	F25C8.1
F25C8.2	amx-3
F25D1.3	F25D1.3
F25D1.5	F25D1.5
F25D7.3	blmp-1
F25E2.4	ifd-2
F25E5.10	try-8
F25E5.2	F25E5.2
F25F2.1	F25F2.1
F25G6.8	F25G6.8
F25H8.6	bed-3
F25H9.2	F25H9.2
F25H9.3	lurp-3
F26A1.12	clec-157
F26A1.9	F26A1.9
F26A3.5	F26A3.5
F26B1.4	col-58
F26D10.13	F26D10.13
F26D2.3	F26D2.3
F26F2.1	F26F2.1
F26G1.4	ttm-2
F26G1.5	F26G1.5
F27B3.2	acr-21
F27C1.8	dpy-5
F27C8.1	aat-1
F27C8.2	F27C8.2
F28A12.1	acd-4
F28A12.2	grl-12
F28A12.3	F28A12.3
F28A12.4	asp-13
F28B4.3	F28B4.3
F28C6.1	aptf-4
F28E10.5	F28E10.5
F28F5.6	F28F5.6
F28G4.2	F28G4.2
F28G4.4	F28G4.4
F28H6.2	ceh-89
F28H7.3	F28H7.3
F29C12.1	pqn-32
F29C6.1	F29C6.1
F29G6.3	hpo-34
F30A10.2	F30A10.2
F30B5.1	dpy-13
F30F8.5	F30F8.5
F31D4.8	F31D4.8
F31D5.5	mth-1
F31F4.11	F31F4.11
F31F4.15	fbxa-72
F31F6.5	daf-6
F31F7.2	F31F7.2
F32A5.8	F32A5.8
F32A7.6	aex-5
F32A7.7	str-245
F32B4.8	F32B4.8
F32B6.10	ttbk-3
F32B6.4	F32B6.4
F32B6.5	sss-1
F32D8.2	F32D8.2
F32D8.3	F32D8.3
F32E10.3	clec-180
F32E10.7	Multiple entries : 2
F32G8.2	F32G8.2
F32H2.8	F32H2.8
F32H5.1	F32H5.1
F32H5.4	F32H5.4
F33A8.7	F33A8.7
F33D11.3	col-54
F33D11.4	ceh-12
F33D4.1	nhr-8
F33D4.2	itr-1
F33D4.6	F33D4.6
F33E2.7	F33E2.7
F33H12.2	sri-39
F33H12.5	sri-36
F33H2.8	F33H2.8
F35B12.2	dhs-20
F35B3.4	F35B3.4
F35C11.4	F35C11.4
F35C11.6	F35C11.6
F35C5.2	sra-14
F35C5.4	F35C5.4
F35C5.5	clec-62
F35C5.6	clec-63
F35C5.7	clec-64
F35C5.8	clec-65
F35C5.9	clec-66
F35D11.10	clec-139
F35D11.7	clec-136
F35D11.8	clec-137
F35D2.2	F35D2.2
F35E12.1	scl-16
F35E12.10	F35E12.10
F35E12.3	fbxa-181
F35E12.5	irg-5
F35E12.6	F35E12.6
F35E12.7	dct-17
F35E12.8	cld-9
F35E12.9	F35E12.9
F35E2.2	F35E2.2
F35E8.11	cdr-1
F35E8.12	nhr-108
F35E8.2	F35E8.2
F35E8.8	gst-38
F35F10.4	F35F10.4
F35F10.5	F35F10.5
F35F10.7	F35F10.7
F35G2.5	F35G2.5
F35H12.5	F35H12.5
F35H8.7	wee-1.1
F36A4.10	col-34
F36D3.4	F36D3.4
F36D4.1	F36D4.1
F36F12.6	clec-208
F36G3.1	F36G3.1
F36G9.11	clec-232
F36G9.12	oac-20
F36G9.13	F36G9.13
F36G9.14	fbxa-99
F36G9.5	sru-22
F36G9.8	sri-1
F36H1.10	hrg-6
F36H1.5	hrg-4
F36H12.16	F36H12.16
F36H2.5	F36H2.5
F36H5.1	math-26
F36H9.5	F36H9.5
F37B1.2	gst-12
F37B1.8	gst-19
F37B12.1	F37B12.1
F37B4.7	folt-2
F37C4.1	oac-21
F37C4.6	F37C4.6
F38A1.1	clec-170
F38A1.10	clec-165
F38A1.4	clec-167
F38A1.7	clec-168
F38A1.9	F38A1.9
F38A5.3	lec-11
F38B6.4	F38B6.4
F38B6.5	col-172
F38B7.2	F38B7.2
F38C2.4	F38C2.4
F38C2.7	F38C2.7
F38E11.9	F38E11.9
F38H4.4	F38H4.4
F39D8.2	psa-3
F39D8.3	F39D8.3
F39E9.1	F39E9.1
F39E9.11	btb-17
F39E9.12	btb-18
F39E9.2	btb-16
F39G3.2	F39G3.2
F40D4.12	F40D4.12
F40F12.7	cbp-3
F40F4.6	irg-7
F40F8.5	F40F8.5
F40F8.7	pqm-1
F40F9.3	F40F9.3
F40F9.5	F40F9.5
F40F9.9	aqp-4
F41B5.2	cyp-33C7
F41B5.3	cyp-33C5
F41B5.7	cyp-33C6
F41C3.11	F41C3.11
F41C6.4	F41C6.4
F41C6.5	col-173
F41C6.7	F41C6.7
F41D9.2	F41D9.2
F41E6.12	F41E6.12
F41E6.14	oac-29
F41E6.2	grd-5
F41F3.3	F41F3.3
F41H10.3	F41H10.3
F41H10.7	elo-5
F41H10.8	elo-6
F42A10.9	F42A10.9
F42A9.4	cyp-33E3
F42A9.7	F42A9.7
F42A9.9	F42A9.9
F42C5.10	ifo-1
F42C5.7	grl-4
F42E11.3	F42E11.3
F42G2.4	fbxa-182
F42G2.5	F42G2.5
F42G2.8	fbxa-4
F42G4.5	F42G4.5
F42G8.11	sph-1
F42G9.5	alh-11
F43C1.5	F43C1.5
F43C9.1	F43C9.1
F43E2.5	msra-1
F43G9.13	F43G9.13
F43G9.8	F43G9.8
F43H9.2	sptl-2
F44A6.3	F44A6.3
F44C4.3	cpr-4
F44C8.1	cyp-33C4
F44C8.7	nstp-8
F44C8.9	nhr-184
F44D12.9	ent-7
F44E2.4	F44E2.4
F44E5.2	F44E5.2
F44E7.2	pgph-2
F44E7.5	F44E7.5
F44E7.7	F44E7.7
F44E7.8	nhr-142
F44F4.11	tba-4
F44F4.6	gly-1
F44F4.7	sra-12
F44G3.10	F44G3.10
F44G3.14	fbxa-143
F44G3.6	skr-3
F45B8.2	Multiple entries : 2
F45E1.3	F45E1.3
F45E1.4	F45E1.4
F45E1.5	F45E1.5
F45E4.1	arf-1.1
F45E4.6	F45E4.6
F45E4.8	nlp-20
F45F2.6	otpl-6
F45G2.8	F45G2.8
F46A8.5	F46A8.5
F46A9.1	F46A9.1
F46A9.3	twk-29
F46B3.1	F46B3.1
F46B3.5	grd-2
F46B6.9	F46B6.9
F46C3.3	hum-4
F46C5.10	F46C5.10
F46C8.6	dpy-7
F46C8.8	F46C8.8
F46E10.11	hpo-26
F46E10.1	acs-1
F46F11.3	F46F11.3
F46F11.5	vha-10
F46G10.3	sir-2.3
F46G10.4	F46G10.4
F46G10.6	mxl-3
F46G11.2	F46G11.2
F46H5.8	lact-1
F47B10.2	haly-1
F47B10.3	F47B10.3
F47B10.7	acbp-3
F47B8.11	sss-2
F47B8.4	F47B8.4
F47B8.5	F47B8.5
F47C10.6	ugt-32
F47C12.6	F47C12.6
F47F6.1	lin-42
F47F6.3	oac-30
F47G4.3	gpdh-1
F47G4.7	smd-1
F47G9.3	cutl-18
F47H4.7	fbxa-187
F47H4.9	fbxa-189
F48A11.2	F48A11.2
F48B9.5	npax-2
F48C1.1	aman-3
F48C1.7	spe-11
F48C5.2	F48C5.2
F48F5.4	srd-70
F48F7.5	F48F7.5
F48F7.7	arrd-24
F48G7.13	F48G7.13
F49A5.2	clec-31
F49A5.4	clec-24
F49A5.5	clec-28
F49C12.6	F49C12.6
F49C12.7	F49C12.7
F49E11.4	scl-9
F49E12.12	F49E12.12
F49E12.2	dod-23
F49E12.9	drd-1
F49F1.1	drd-50
F49F1.10	F49F1.10
F49F1.5	F49F1.5
F49F1.6	mul-1
F49F1.7	F49F1.7
F49H12.5	txdc-12.2
F49H12.6	acl-4
F49H6.13	F49H6.13
F52B11.3	noah-2
F52D1.1	aagr-4
F52D1.3	abu-12
F52D10.5	sto-3
F52D2.8	fbxa-46
F52E1.14	F52E1.14
F52E1.7	hsp-17
F52E4.4	twk-16
F52F10.2	F52F10.2
F52F10.3	oac-31
F52F10.4	oac-32
F52H2.3	F52H2.3
F52H2.6	F52H2.6
F53B1.4	F53B1.4
F53B1.6	swip-10
F53B2.8	F53B2.8
F53B3.6	F53B3.6
F53C11.1	F53C11.1
F53C3.1	F53C3.1
F53C3.12	bcmo-2
F53E10.4	irg-3
F53E10.5	F53E10.5
F53F1.1	cutl-1
F53F1.4	F53F1.4
F53F1.5	cut-2
F53F8.1	klf-2
F53F8.2	srsx-35
F53H2.1	F53H2.1
F53H4.3	F53H4.3
F54A5.3	shc-1
F54B11.11	F54B11.11
F54B11.2	col-44
F54B11.9	F54B11.9
F54D1.1	F54D1.1
F54D10.4	F54D10.4
F54D11.1	pmt-2
F54D5.3	F54D5.3
F54D5.4	F54D5.4
F54E2.1	F54E2.1
F54E4.4	F54E4.4
F54F11.2	nep-17
F54F3.1	nid-1
F54F3.3	lipl-1
F54F7.2	F54F7.2
F54F7.4	xtr-1
F54F7.8	F54F7.8
F54H12.5	F54H12.5
F54H5.2	F54H5.2
F54H5.4	klf-3
F54H5.5	F54H5.5
F55A11.5	Multiple entries : 2
F55A12.9	pqn-44
F55B12.2	F55B12.2
F55B12.9	srx-129
F55C5.9	srh-16
F55D12.4	unc-55
F55E10.6	drd-5
F55F3.2	F55F3.2
F55F3.3	nkb-3
F55F3.4	F55F3.4
F55F8.1	ptr-10
F55F8.8	F55F8.8
F55G1.12	F55G1.12
F55G1.15	F55G1.15
F55G11.1	F55G11.1
F55G11.2	F55G11.2
F55G11.4	F55G11.4
F55G11.5	dod-22
F55G11.7	F55G11.7
F55G11.8	F55G11.8
F55G11.9	abt-3
F55H12.3	F55H12.3
F55H2.2	vha-14
F56A12.2	F56A12.2
F56A6.1	sago-2
F56B6.2	Multiple entries : 2
F56C3.2	fbxa-190
F56C3.9	F56C3.9
F56C9.7	F56C9.7
F56D2.8	F56D2.8
F56D3.1	F56D3.1
F56D6.14	F56D6.14
F56D6.2	clec-67
F56E10.3	F56E10.3
F56F10.1	F56F10.1
F56F4.1	ttr-58
F56H1.1	che-14
F56H1.2	nhr-266
F57B1.3	col-159
F57B10.11	bag-1
F57B7.2	F57B7.2
F57B7.3	col-156
F57B9.9	abu-13
F57C12.1	nas-38
F57C12.3	hlh-19
F57F4.1	F57F4.1
F57F4.3	gfi-1
F57F4.4	F57F4.4
F57F5.1	F57F5.1
F57F5.2	gcy-33
F57G12.2	F57G12.2
F57G8.5	F57G8.5
F57H12.6	F57H12.6
F58A4.1	F58A4.1
F58A4.11	gei-13
F58A6.2	F58A6.2
F58A6.4	nas-29
F58A6.5	F58A6.5
F58A6.9	F58A6.9
F58B3.1	lys-4
F58B3.3	lys-6
F58B4.1	nas-31
F58B4.2	F58B4.2
F58B4.5	F58B4.5
F58B6.1	F58B6.1
F58E1.5	fbxb-17
F58E6.4	F58E6.4
F58F9.4	F58F9.4
F58F9.8	F58F9.8
F58G1.4	dct-18
F58G1.5	lips-9
F58G6.3	F58G6.3
F58G6.7	F58G6.7
F58G6.9	F58G6.9
F58H1.4	Multiple entries : 2
F58H1.6	F58H1.6
F59A1.10	dgat-2
F59A1.8	fbxa-129
F59A3.8	F59A3.8
F59A6.4	F59A6.4
F59B1.8	F59B1.8
F59B10.1	myrf-1
F59B10.5	F59B10.5
F59C6.6	nlp-4
F59C6.8	F59C6.8
F59D12.3	F59D12.3
F59D8.1	vit-3
F59D8.2	vit-4
F59E11.12	nhr-144
F59E11.2	F59E11.2
F59E12.4	npl-4.1
F59F3.5	ver-4
F59F4.4	acl-1
F59F5.1	slcf-1
F59F5.5	F59F5.5
F59F5.7	F59F5.7
H01G02.2	dyf-18
H02F09.2	H02F09.2
H02F09.3	H02F09.3
H03A11.2	H03A11.2
H03E18.1	H03E18.1
H03G16.2	mam-6
H04M03.1	pck-3
H04M03.4	glf-1
H06H21.8	H06H21.8
H10E21.4	H10E21.4
H12C20.3	nhr-68
H12D21.6	H12D21.6
H12D21.7	mpst-3
H12D21.9	H12D21.9
H17B01.3	lips-14
H19J13.1	otpl-8
H19M22.3	zmp-2
H20E11.1	H20E11.1
H20E11.2	H20E11.2
H20E11.3	H20E11.3
H20J04.9	H20J04.9
H22K11.1	asp-3
H23L24.4	H23L24.4
H25K10.1	H25K10.1
H25K10.4	H25K10.4
H25P06.4	clpr-3
H34I24.2	H34I24.2
H37A05.2	H37A05.2
H41C03.3	H41C03.3
H42K12.3	H42K12.3
H43E16.1	H43E16.1
JC8.12	bus-12
K01A11.5	K01A11.5
K01A2.11	cbn-1
K01B6.1	fozi-1
K01D12.11	cdr-4
K01D12.12	cdr-6
K01D12.13	cdr-7
K01F9.2	K01F9.2
K02A2.5	K02A2.5
K02A4.1	bcat-1
K02B12.9	K02B12.9
K02C4.2	K02C4.2
K02D3.2	K02D3.2
K02D7.3	col-101
K02D7.4	dsc-4
K02E10.4	K02E10.4
K02E11.1	ent-3
K02E11.10	K02E11.10
K02E11.4	K02E11.4
K02E11.5	K02E11.5
K02E7.1	K02E7.1
K02F6.1	K02F6.1
K02G10.3	tmem-135
K03A1.5	sur-5
K03B8.2	nas-17
K03H1.13	K03H1.13
K03H6.1	K03H6.1
K03H9.2	col-75
K04A8.1	K04A8.1
K04A8.5	lipl-4
K04A8.6	Multiple entries : 2
K04D7.3	gta-1
K04E7.1	K04E7.1
K04F1.7	irld-42
K04F1.8	K04F1.8
K04F1.9	K04F1.9
K04G11.3	K04G11.3
K04G2.7	K04G2.7
K04H4.6	crn-6
K04H8.3	K04H8.3
K05B2.4	K05B2.4
K05B2.5	mct-4
K05F1.9	K05F1.9
K05G3.3	cah-3
K06A1.2	K06A1.2
K06A4.1	nas-3
K06A4.4	swt-5
K06A4.5	haao-1
K06B4.8	nhr-198
K06B9.1	cyp-25A6
K06B9.3	K06B9.3
K06C4.17	frpr-13
K06C4.9	frpr-12
K06G5.1	K06G5.1
K07A1.10	K07A1.10
K07B1.4	K07B1.4
K07C5.7	ttll-15
K07C6.3	cyp-35B2
K07C6.4	cyp-35B1
K07E3.7	catp-5
K07E8.3	sdz-24
K07E8.5	frpr-14
K07H8.5	K07H8.5
K07H8.6	vit-6
K08B12.1	K08B12.1
K08B4.3	ugt-19
K08C9.4	col-65
K08D8.1	K08D8.1
K08D8.3	K08D8.3
K08D8.4	K08D8.4
K08D8.5	K08D8.5
K08D8.6	K08D8.6
K08E5.3	mua-3
K08E7.5	K08E7.5
K08E7.7	cul-6
K08E7.9	pgp-1
K08F4.7	gst-4
K08F8.3	fut-1
K08F8.4	pah-1
K08F8.5	K08F8.5
K08F8.7	K08F8.7
K08H10.6	K08H10.6
K08H10.9	trpp-6
K09A11.3	cyp-14A2
K09B11.10	mam-3
K09B3.1	K09B3.1
K09C4.5	K09C4.5
K09C6.7	K09C6.7
K09C8.1	pbo-4
K09C8.4	lge-1
K09D9.13	srw-89
K09D9.2	cyp-35A3
K09E10.2	oac-58
K09E9.1	K09E9.1
K09F5.2	vit-1
K09F6.2	K09F6.2
K09F6.5	K09F6.5
K09G1.4	dop-2
K09H11.1	acds-10
K10B2.2	ctsa-4.1
K10C2.1	ctsa-2
K10C2.3	asp-14
K10C8.2	frpr-15
K10D11.1	dod-17
K10D11.2	K10D11.2
K10D11.3	K10D11.3
K10D11.5	K10D11.5
K10D11.6	K10D11.6
K10G4.3	K10G4.3
K10G4.5	K10G4.5
K10G6.2	dos-2
K10H10.2	cysl-2
K11D12.10	mlk-1
K11D12.13	K11D12.13
K11D12.6	K11D12.6
K11D12.7	K11D12.7
K11D12.8	K11D12.8
K11E4.1	K11E4.1
K11G12.1	nas-11
K11G9.2	K11G9.2
K11G9.3	K11G9.3
K11H12.10	K11H12.10
K11H12.11	K11H12.11
K11H12.3	K11H12.3
K11H12.4	K11H12.4
K11H12.7	K11H12.7
K11H3.2	K11H3.2
K12B6.3	fil-2
K12C11.3	K12C11.3
K12H4.7	K12H4.7
LLC1.2	LLC1.2
M01E10.2	Multiple entries : 2
M02B1.1	Multiple entries : 2
M02D8.1	zig-12
M02D8.5	M02D8.5
M02F4.7	clec-265
M02H5.11	srh-35
M02H5.4	nhr-202
M02H5.6	nhr-98
M02H5.7	nhr-123
M02H5.8	M02H5.8
M03A8.1	dhs-28
M03B6.1	M03B6.1
M03B6.3	M03B6.3
M03E7.4	M03E7.4
M03F4.6	M03F4.6
M03F8.1	M03F8.1
M04B2.5	twk-25
M04C3.2	M04C3.2
M04C7.4	M04C7.4
M04C9.3	M04C9.3
M04C9.4	M04C9.4
M04D8.6	xbx-3
M05D6.4	lact-4
M110.1	col-76
M110.8	M110.8
M110.9	M110.9
M142.2	cut-6
M151.2	M151.2
M151.6	fbxb-32
M163.11	M163.11
M176.5	M176.5
M195.1	col-77
M199.5	col-135
M28.10	M28.10
M28.8	M28.8
M28.9	M28.9
M6.1	ifc-2
M60.5	kqt-2
M7.10	M7.10
M7.12	M7.12
M7.8	M7.8
M7.9	M7.9
M88.1	ugt-62
M88.7	cisd-3.1
PDB1.1	PDB1.1
R01H2.5	ger-1
R01H2.7	R01H2.7
R02D1.1	nhr-125
R02E4.1	R02E4.1
R03G5.5	gpx-7
R03G8.3	R03G8.3
R03G8.6	R03G8.6
R03H10.7	R03H10.7
R03H4.6	Multiple entries : 2
R04B3.1	R04B3.1
R04B3.3	R04B3.3
R04B5.3	nhr-205
R04B5.8	srd-49
R04B5.9	ugt-47
R04D3.1	cyp-14A4
R04E5.10	ifd-1
R04E5.2	cnnm-2
R04F11.5	R04F11.5
R05A10.2	R05A10.2
R05A10.3	R05A10.3
R05C11.1	arrd-26
R05D3.12	R05D3.12
R05D8.7	R05D8.7
R05F9.12	aagr-2
R05F9.5	gst-9
R05G6.5	R05G6.5
R05H10.6	cdh-7
R05H11.2	R05H11.2
R05H5.6	srb-6
R06B10.3	clec-150
R06B10.7	R06B10.7
R06B9.2	arrd-12
R07A4.4	R07A4.4
R07B1.10	lec-8
R07B1.11	R07B1.11
R07B1.12	glo-1
R07B1.2	lec-7
R07B1.3	scav-5
R07B1.4	gst-36
R07B1.5	R07B1.5
R07B1.7	R07B1.7
R07B7.11	gana-1
R07B7.14	nhr-207
R07B7.15	nhr-208
R07B7.6	R07B7.6
R07B7.9	R07B7.9
R07C3.9	fbxc-31
R07E3.4	R07E3.4
R07E3.6	R07E3.6
R07E3.7	R07E3.7
R07E5.4	R07E5.4
R07G3.6	Multiple entries : 2
R08A2.1	R08A2.1
R08A2.5	R08A2.5
R08B4.1	grd-1
R08C7.4	R08C7.4
R08D7.7	R08D7.7
R08E3.1	R08E3.1
R08E3.2	R08E3.2
R08E5.1	R08E5.1
R08E5.3	R08E5.3
R08F11.3	cyp-33C8
R08F11.4	R08F11.4
R09A1.3	R09A1.3
R09B5.4	fpn-1.2
R09B5.7	srj-23
R09D1.10	chil-22
R09D1.11	chil-23
R09D1.2	chil-16
R09E12.2	srbc-58
R09H10.5	R09H10.5
R09H10.8	R09H10.8
R102.1	R102.1
R102.4	R102.4
R105.1	R105.1
R10D12.9	swt-6
R10E9.3	R10E9.3
R10H1.4	Multiple entries : 2
R10H1.5	Multiple entries : 2
R10H10.3	R10H10.3
R11A5.7	suro-1
R11A8.3	ugt-59
R11D1.11	dhs-21
R11E3.1	R11E3.1
R11E3.5	nhr-104
R11G1.3	gst-11
R11G11.6	R11G11.6
R11H6.1	pes-9
R12A1.4	ges-1
R12C12.1	gldc-1
R12C12.9	R12C12.9
R12E2.4	inx-17
R12E2.5	inx-16
R12H7.2	asp-4
R13A1.5	R13A1.5
R13A5.4	lgc-12
R13H4.3	pho-8
R144.1	klp-6
R148.7	R148.7
R17.3	R17.3
R173.1	cah-5
R186.6	mpst-7
R193.2	R193.2
R52.7	srh-195
R52.8	R52.8
R57.1	gcp-2.1
R57.2	R57.2
T01B10.2	grd-14
T01B11.2	eppl-1
T01B7.7	rol-6
T01C8.3	T01C8.3
T01D1.4	T01D1.4
T01D1.8	T01D1.8
T01D3.6	T01D3.6
T01G6.4	nhr-106
T01G6.7	nhr-55
T01H8.2	T01H8.2
T02B11.4	T02B11.4
T02B5.1	cest-1
T02C12.1	hum-5
T02D1.5	pmp-4
T02E1.1	spe-12
T02E1.4	T02E1.4
T02E1.5	dhs-3
T02E1.6	T02E1.6
T02E9.2	grl-7
T02G5.3	T02G5.3
T02G5.6	msh-4
T02G6.1	T02G6.1
T02H6.6	T02H6.6
T03D3.1	ugt-53
T03E6.5	srh-269
T03E6.7	cpl-1
T03F1.10	clec-53
T03F7.6	T03F7.6
T03F7.7	T03F7.7
T03G11.2	sru-48
T03G6.1	T03G6.1
T04A8.5	ppat-1
T04B2.3	T04B2.3
T04B2.7	T04B2.7
T04C10.4	atf-5
T04F3.2	smoc-1
T04F3.4	T04F3.4
T04F8.9	T04F8.9
T04H1.8	ugt-56
T05A12.2	tre-2
T05A7.5	fut-6
T05B11.4	T05B11.4
T05C1.3	T05C1.3
T05C12.10	qua-1
T05C3.6	T05C3.6
T05E12.6	T05E12.6
T05E7.1	T05E7.1
T05E7.2	col-55
T05F1.9	T05F1.9
T05G5.6	ech-6
T05H4.15	T05H4.15
T05H4.5	hpo-19
T06A1.5	T06A1.5
T06A4.3	T06A4.3
T06D8.10	T06D8.10
T06E4.6	col-146
T06E4.7	T06E4.7
T06E6.3	fbxa-199
T06E6.5	fbxa-135
T06E8.1	acl-2
T06G6.6	T06G6.6
T06G6.7	srw-88
T07A5.3	vglu-3
T07A5.4	ostf-4
T07A9.1	pqbp-1.2
T07A9.12	T07A9.12
T07E3.4	T07E3.4
T07F10.1	anp-1
T07F10.4	bus-19
T07G12.3	T07G12.3
T07G12.5	T07G12.5
T07H3.2	bath-46
T07H3.6	bath-26
T07H8.6	ptr-15
T08A9.12	spp-2
T08A9.8	spp-4
T08B1.1	T08B1.1
T08B2.3	T08B2.3
T08B6.2	T08B6.2
T08B6.5	sgnh-1
T08D2.1	tmed-12
T08D2.2	T08D2.2
T08E11.3	math-40
T08G2.2	T08G2.2
T09A12.1	T09A12.1
T09A5.6	mdt-10
T09B4.4	T09B4.4
T09B4.7	T09B4.7
T09B4.8	T09B4.8
T09B9.5	T09B9.5
T09E8.4	T09E8.4
T09F5.1	T09F5.1
T09F5.10	T09F5.10
T09F5.11	fbxa-84
T09F5.9	clec-47
T10B10.1	col-41
T10B10.8	T10B10.8
T10B11.9	Multiple entries : 2
T10B5.10	T10B5.10
T10B9.7	cyp-13A2
T10C6.10	T10C6.10
T10D4.4	ins-31
T10E9.3	T10E9.3
T10E9.4	T10E9.4
T10E9.8	T10E9.8
T10G3.3	T10G3.3
T10H10.1	hum-6
T10H4.12	cpr-3
T10H4.4	T10H4.4
T10H4.9	srx-51
T10H9.5	pmp-5
T11F8.1	T11F8.1
T11F8.2	T11F8.2
T11F9.3	nas-20
T11F9.5	nas-21
T11F9.8	T11F9.8
T11F9.9	col-157
T12A7.2	T12A7.2
T12A7.4	lips-5
T12B3.1	T12B3.1
T12B5.1	fbxa-51
T12B5.10	fbxa-60
T12B5.2	fbxa-54
T12B5.8	fbxa-59
T12C9.1	nhr-273
T13A10.10	aat-4
T13A10.12	srv-32
T13B5.6	lips-12
T13B5.9	T13B5.9
T13C2.2	T13C2.2
T13C5.3	T13C5.3
T13C5.7	T13C5.7
T13F2.4	T13F2.4
T13F3.6	T13F3.6
T13H10.2	T13H10.2
T13H5.2	ctg-2
T14B1.2	Multiple entries : 2
T14B4.5	T14B4.5
T14B4.6	dpy-2
T14B4.7	dpy-10
T14G12.2	Multiple entries : 2
T14G12.3	tag-18
T15B7.1	T15B7.1
T15B7.14	T15B7.14
T15B7.16	lgc-54
T15B7.3	col-143
T16A9.5	T16A9.5
T16G1.2	T16G1.2
T16G1.5	T16G1.5
T16G1.6	T16G1.6
T16G1.8	grl-2
T16G12.1	T16G12.1
T16G12.7	T16G12.7
T16H12.6	kel-10
T17A3.8	ver-2
T17H7.7	T17H7.7
T18H9.1	grd-6
T18H9.2	asp-2
T19A5.3	T19A5.3
T19B10.1	cyp-29A2
T19B10.2	T19B10.2
T19B10.5	T19B10.5
T19B10.9	mam-4
T19C3.2	T19C3.2
T19C4.8	srg-38
T19C9.8	T19C9.8
T19D12.1	T19D12.1
T19D12.9	T19D12.9
T19D7.2	T19D7.2
T19D7.3	lpr-7
T19H12.9	ugt-12
T20B3.12	clec-26
T20B3.13	clec-40
T20B3.15	clec-25
T20B3.16	clec-36
T20D3.2	T20D3.2
T20D4.1	srab-20
T20D4.13	T20D4.13
T20D4.3	T20D4.3
T20D4.5	T20D4.5
T20H9.1	fbxa-7
T20H9.4	fbxa-73
T21B4.12	srx-118
T21B4.7	srh-69
T21B6.2	pho-7
T21C12.2	hpd-1
T21C9.11	T21C9.11
T21C9.6	T21C9.6
T21C9.7	srg-32
T21C9.8	ttr-23
T21C9.9	T21C9.9
T21D12.11	T21D12.11
T21D12.2	dpy-9
T21F2.1	lgc-53
T21G5.1	T21G5.1
T21G5.2	T21G5.2
T21G5.6	let-383
T21H3.1	T21H3.1
T21H3.2	ptr-16
T22B11.2	Multiple entries : 2
T22B3.1	dpy-20
T22B3.2	alg-3
T22B3.3	T22B3.3
T22B7.1	egl-13
T22B7.7	T22B7.7
T22C1.5	T22C1.5
T22C8.1	T22C8.1
T22D1.11	T22D1.11
T22E7.1	lron-8
T22F3.8	T22F3.8
T22F7.4	T22F7.4
T22G5.5	sptl-3
T22G5.6	lbp-8
T22H6.2	alh-13
T23D5.6	str-18
T23E1.1	T23E1.1
T23F2.1	Multiple entries : 2
T23F4.2	T23F4.2
T23F6.5	T23F6.5
T23H4.3	nas-5
T24B8.5	T24B8.5
T24C2.1	ram-5
T24C4.4	T24C4.4
T24C4.8	T24C4.8
T24C4.9	T24C4.9
T24E12.5	T24E12.5
T25B9.1	T25B9.1
T25C12.3	T25C12.3
T25C12.4	spp-21
T25C8.1	T25C8.1
T25C8.2	act-5
T25D10.1	T25D10.1
T25D10.5	btb-2
T25E12.11	srz-100
T25E12.12	fbxa-127
T25E12.13	srz-99
T25G12.6	T25G12.6
T26C12.2	T26C12.2
T26C12.6	clec-173
T26C5.1	gst-13
T26C5.2	T26C5.2
T26E4.4	T26E4.4
T27A10.3	ckc-1
T27A10.6	T27A10.6
T27A3.1	trak-1
T27B7.3	nhr-226
T27B7.4	nhr-115
T27C10.4	bath-25
T27C4.2	hpo-36
T27C5.12	T27C5.12
T27C5.8	T27C5.8
T27E9.8	fbxb-86
T28A11.21	fbxa-64
T28B4.4	hic-1
T28D6.2	tba-7
T28D6.7	T28D6.7
T28F2.7	acd-5
T28F3.4	slc-17.4
T28F3.8	T28F3.8
T28F4.3	T28F4.3
T28H10.2	T28H10.2
T28H10.3	T28H10.3
T28H11.7	T28H11.7
VC5.3	npa-1
VW02B12L.1	vha-6
VZC374L.1	sek-6
VZK822L.2	VZK822L.2
W01A11.4	lec-10
W01A8.6	W01A8.6
W01A8.7	W01A8.7
W01C8.5	W01C8.5
W01F3.3	mlt-11
W02B12.1	W02B12.1
W02B12.4	W02B12.4
W02B8.6	mltn-5
W02D7.5	W02D7.5
W02G9.2	kel-8
W02G9.4	W02G9.4
W02H3.1	W02H3.1
W03A5.2	W03A5.2
W03B1.2	trpl-2
W03D2.6	W03D2.6
W03D8.11	W03D8.11
W03F9.11	W03F9.11
W04B5.3	W04B5.3
W04E12.6	clec-49
W04E12.8	clec-50
W04G3.1	lpr-6
W04G3.2	lpr-5
W04G3.3	lpr-4
W04G3.8	lpr-3
W05B2.5	col-93
W05B2.6	col-92
W05E10.4	tre-3
W05E10.5	W05E10.5
W06A11.3	fbxb-118
W06B11.4	hog-1
W06B3.1	nmat-1
W06B3.2	sma-5
W06D12.5	twk-33
W06D4.1	hgo-1
W06D4.3	W06D4.3
W06G6.9	W06G6.9
W07A12.6	oac-54
W07A12.7	rhy-1
W07A12.8	W07A12.8
W07B8.1	cpr-8
W07G1.2	sre-44
W07G1.3	zip-3
W08D2.1	egl-20
W08E12.1	zip-11
W08F4.6	mlt-8
W08G11.1	W08G11.1
W09C5.4	ins-33
W09G12.10	W09G12.10
W10G11.10	srh-59
Y102A11A.1	Y102A11A.1
Y102A11A.3	Y102A11A.3
Y102A11A.5	Y102A11A.5
Y102A5B.1	clec-27
Y102A5B.2	clec-35
Y102A5B.3	clec-37
Y102A5C.32	sri-69
Y102E9.5	Y102E9.5
Y105C5B.14	Y105C5B.14
Y105C5B.15	Y105C5B.15
Y105C5B.18	Y105C5B.18
Y105C5B.2	gcy-25
Y105C5B.6	srv-15
Y105C5B.8	Y105C5B.8
Y105E8A.13	Y105E8A.13
Y105E8B.5	hprt-1
Y106G6H.1	Y106G6H.1
Y110A7A.11	use-1
Y110A7A.3	unc-63
Y113G7A.14	Y113G7A.14
Y113G7B.14	Y113G7B.14
Y116A8C.19	Y116A8C.19
Y116A8C.20	Y116A8C.20
Y116A8C.5	nep-24
Y116F11B.2	Y116F11B.2
Y116F11B.6	Y116F11B.6
Y119C1B.9	zig-9
Y119D3B.13	Y119D3B.13
Y119D3B.8	fbxa-61
Y11D7A.14	nmy-3
Y11D7A.5	Y11D7A.5
Y11D7A.9	Y11D7A.9
Y16B4A.2	Y16B4A.2
Y17D7B.1	nhr-231
Y17D7C.1	Y17D7C.1
Y17G7B.11	arrd-7
Y17G7B.14	arrd-8
Y17G7B.19	Y17G7B.19
Y17G7B.8	Y17G7B.8
Y17G9A.4	Y17G9A.4
Y18D10A.18	fbxa-121
Y18D10A.2	Y18D10A.2
Y18D10A.22	Y18D10A.22
Y18D10A.6	nhx-8
Y18H1A.12	col-47
Y18H1A.13	col-46
Y18H1A.9	Y18H1A.9
Y20C6A.1	Y20C6A.1
Y22D7AL.11	Y22D7AL.11
Y22D7AL.9	Y22D7AL.9
Y22D7AR.13	ser-4
Y22D7AR.9	fbxa-74
Y22F5A.4	lys-1
Y22F5A.5	lys-2
Y23H5B.8	Y23H5B.8
Y24D9A.5	Y24D9A.5
Y26D4A.10	Y26D4A.10
Y26D4A.3	Y26D4A.3
Y26D4A.4	clec-107
Y27F2A.3	sri-40
Y2C2A.1	Y2C2A.1
Y32B12A.3	comt-2
Y32B12C.1	Y32B12C.1
Y32F6A.4	Y32F6A.4
Y32F6A.5	Y32F6A.5
Y32F6B.2	ncx-5
Y32F6B.3	crp-1
Y32G9A.13	Y32G9A.13
Y32G9A.6	nphp-2
Y32G9B.1	Y32G9B.1
Y34B4A.10	Y34B4A.10
Y34B4A.5	Y34B4A.5
Y34B4A.6	Y34B4A.6
Y34B4A.9	Y34B4A.9
Y34D9A.11	spp-23
Y34F4.4	Y34F4.4
Y34F4.5	Y34F4.5
Y37A1A.3	Y37A1A.3
Y37A1A.4	Y37A1A.4
Y37A1B.13	tor-2
Y37A1B.15	gei-18
Y37E11AL.1	Y37E11AL.1
Y37E11B.10	Y37E11B.10
Y37F4.1	Y37F4.1
Y37H2A.11	Y37H2A.11
Y38A10A.2	Y38A10A.2
Y38C1AA.6	Y38C1AA.6
Y38E10A.19	nhr-235
Y38E10A.5	clec-4
Y38F1A.3	ptr-18
Y38F1A.6	hphd-1
Y38F2AL.3	vha-11
Y38H6C.1	dct-16
Y38H6C.16	Y38H6C.16
Y39A1A.9	Y39A1A.9
Y39A3B.3	Y39A3B.3
Y39B6A.1	Y39B6A.1
Y39B6A.19	twk-46
Y39B6A.20	asp-1
Y39B6A.23	asp-16
Y39B6A.24	asp-17
Y39B6A.41	Y39B6A.41
Y39C12A.8	dnj-26
Y39D8A.1	Y39D8A.1
Y39D8C.1	abt-4
Y39E4B.4	tsp-3
Y39E4B.9	bre-2
Y39G8B.7	Y39G8B.7
Y39H10A.4	Y39H10A.4
Y39H10A.5	Y39H10A.5
Y39H10B.2	Y39H10B.2
Y40C5A.3	Y40C5A.3
Y40C7B.4	Y40C7B.4
Y40D12A.2	ctsa-4.2
Y40H7A.10	Y40H7A.10
Y41D4B.15	Y41D4B.15
Y41D4B.16	hpo-6
Y41D4B.17	Y41D4B.17
Y41D4B.18	Y41D4B.18
Y41E3.19	Y41E3.19
Y41E3.2	dpy-4
Y41G9A.5	Y41G9A.5
Y42A5A.2	lact-8
Y42H9B.1	col-115
Y43C5A.2	Y43C5A.2
Y43D4A.6	Y43D4A.6
Y43E12A.3	Y43E12A.3
Y43F4A.4	Y43F4A.4
Y43F8A.2	Y43F8A.2
Y43F8B.12	Y43F8B.12
Y43F8B.14	Y43F8B.14
Y43F8C.1	nlp-25
Y43F8C.13	Y43F8C.13
Y43F8C.17	Y43F8C.17
Y43F8C.5	Y43F8C.5
Y44A6B.3	Y44A6B.3
Y45F10B.14	srd-10
Y45F10D.14	Y45F10D.14
Y45G12C.2	gst-10
Y46C8AL.2	clec-174
Y46C8AL.3	clec-70
Y46C8AL.4	clec-71
Y46C8AL.5	clec-72
Y46C8AL.8	clec-74
Y46D2A.1	Y46D2A.1
Y46D2A.2	Y46D2A.2
Y46D2A.3	Y46D2A.3
Y46G5A.22	Y46G5A.22
Y46G5A.29	Y46G5A.29
Y47D3A.10	tbx-34
Y47D3A.12	tbx-37
Y47D3B.1	subs-4
Y47D7A.13	Y47D7A.13
Y47D7A.16	rft-1
Y47D7A.5	grl-5
Y47G6A.30	Y47G6A.30
Y47H9C.1	Y47H9C.1
Y47H9C.10	fbxa-216
Y48A6B.2	Y48A6B.2
Y48A6B.7	Y48A6B.7
Y48A6B.9	Y48A6B.9
Y48E1B.15	Y48E1B.15
Y48G1BR.1	Y48G1BR.1
Y48G8AR.1	grh-1
Y49E10.16	Y49E10.16
Y49E10.18	Y49E10.18
Y49G5A.1	Y49G5A.1
Y4C6B.2	Y4C6B.2
Y4C6B.6	gba-4
Y50D4B.3	Y50D4B.3
Y50D4B.4	Y50D4B.4
Y50E8A.16	haf-7
[truncated: 126 more rows]
