# Supplementary material for: NHR-14 loss of function couples intestinal iron uptake with innate immunity in C. elegans through PQM-1 signaling
Source: eLife journal article supplement (doi:10.7554/elife.44674), 2019-09-18
Supplement: supp [file elife-44674-supp-v1.zip › elife_poa_e44674_Figure_6_source_data_2.xlsx]

## Sheet: Overlap
Figure 6 - source data 2: Overlap between upregulated nhr-14 (tm1473) genes at a log fold change > 1 and published datasets for the p38/MAPK, TGFb and elt-2 pathways. Genes in common are listed below.
p38/MAPK (Troemel et al., 2006) vs nhr-14(tm1473)		TGFβ (Roberts et al., 2010) vs nhr-14(tm1473)		elt2-p38/MAPK ( Block et al., 2015) vs nhr-14(tm1473)
Gene ID	Gene name	Gene ID	Gene name	Gene ID	Gene name
C32H11.12	dod-24	C32H11.12	dod-24	Y43C5A.2	Y43C5A.2
ZK6.10	dod-19	B0365.6	clec-41	C18H9.6	C18H9.6
C14C6.5	C14C6.5	C14C6.5	C14C6.5	F19C7.1	F19C7.1
Y54G2A.6	clec-85	F36G9.12	oac-20	Y22F5A.5	lys-2
ZK6.11	ZK6.11	F53F1.6	F53F1.6	C28C12.5	spp-8
Y41D4B.16	hpo-6	F35C5.6	clec-63	H34I24.2	H34I24.2
C17H12.8	C17H12.8	F01D5.1	F01D5.1	F35E12.7	dct-17
Y39D8A.1	Y39D8A.1	C29F9.3	pals-23	K11D2.2	asah-1
F01D5.3	F01D5.3	F35E8.8	gst-38	F55G11.5	dod-22
F01D5.1	F01D5.1	R09D1.11	chil-23	R06B10.3	clec-150
T24B8.5	T24B8.5	ZK896.5	ZK896.5	ZK6.10	dod-19
F55G11.8	F55G11.8	ZK856.5	ZK856.5	T28H10.3	T28H10.3
F54D5.4	F54D5.4	K08F9.1	K08F9.1	Y46C8AL.2	clec-174
F01D5.5	F01D5.5	F56A4.2	F56A4.2	B0554.6	dod-20
F01D4.2	ugt-44	F19C7.2	F19C7.2	C32H11.12	dod-24
Y22F5A.5	lys-2	Y22F5A.5	lys-2	F35C5.6	clec-63
F55G11.4	F55G11.4	Y105C5B.15	Y105C5B.15	Y47H9C.1	Y47H9C.1
F35E12.8	cld-9	F35C5.8	clec-65	F09B9.1	oac-14
F56D6.2	clec-67	F55G11.5	dod-22	ZK896.5	ZK896.5
Y37A1A.2	Y37A1A.2	F55G11.4	F55G11.4	F56F10.1	F56F10.1
F01D5.2	F01D5.2	F56D6.2	clec-67	F27C8.4	spp-18
		F19C7.4	F19C7.4	H22K11.1	asp-3
		C07G3.2	irg-1	Y37E3.16	fpn-1.1
		B0348.2	B0348.2	R07B1.10	lec-8
		Y46C8AL.2	clec-174	F01D5.8	F01D5.8
		T28D6.2	tba-7	F53B2.8	F53B2.8
		C10C5.2	C10C5.2	ZC443.5	ugt-18
		K10D11.1	dod-17	C08E8.4	C08E8.4
		F10G2.3	clec-7	Y60A3A.18	skr-4
		F55G11.2	F55G11.2	C09F12.1	clc-1
		Y9C9A.8	Y9C9A.8	Y54G2A.7.1	Y54G2A.7
		C16C4.5	math-15	ZK520.2	sid-2
				ZK6.11	ZK6.11
				Y34B4A.6.1	Y34B4A.6
				C35D10.14	clec-5
				ZK1251.2	ins-7

## Sheet: p38-MAPK Troemel et al., 2006
Gene list from Troemel et al., 2006 used for the comparison with upregulated nhr-14(tm173) genes at log fold change > 1
Gene ID	Gene name
F08G5.6	irg-4
C09H5.2	catp-3
C17H12.8	C17H12.8
C09H5.2
F01D5.5	F01D5.5
C17H12.8
Y22F5A.5	lys-2
F01D5.1	F01D5.1
F55G11.8	F55G11.8
T24B8.5	T24B8.5
F59A7.2	F59A7.2
K04F1.9	K04F1.9
F56D6.2///F56D6.1	clec-67, clec-68
Y54G2A.6	clec-85
C32H11.12	dod-24
B0213.4	nlp-29
F55G11.4	F55G11.4
F01D5.2	F01D5.2
B0222.4	spl-2
T02B11.4	T02B11.4
K08D8.5	K08D8.5
Y42A5A.3	Y42A5A.3
F35E12.5	irg-5
ZK822.3	nhx-9
F15B9.1	far-3
K02E7.6	K02E7.6
ZK84.3	ins-5
Y41D4B.16	hpo-6
F01D5.3	F01D5.3
C37H5.9	nas-9
B0213.6	nlp-31
ZK6.10	dod-19
Y25C1A.3	clec-122
K11G12.1	nas-11
C35C5.2	gcp-2.2
Y37A1A.2	Y37A1A.2
F17E9.11	lys-10
D2007.1	D2007.1
F19H6.5	F19H6.5
F41C3.2	F41C3.2
C08F11.13	C08F11.13
C46C2.5	C46C2.5
C02H6.2	fbxa-105
ZK6.11	ZK6.11
Y77E11A.8	Y77E11A.8
W09G12.1	dsl-2
M02F4.7	clec-265
C14C6.5	C14C6.5
C02C6.2a	not found
K02F3.4	zip-2
B0213.3	nlp-28
F23B2.12	pcp-2
F52G3.5	F52G3.5
Y45F10D.6	Y45F10D.6
F35E12.8	cld-9
F22B7.3	F22B7.3
T19C9.7	T19C9.7
K10C2.3	asp-14
C33C12.10	C33C12.10
F01D4.2	ugt-44
H20E11.3	H20E11.3
Y44A6B.1	srxa-14
R09E10.8	R09E10.8
C06B8.3	C06B8.3
C39B5.3	fbxa-62
T28C12.2	T28C12.2
F54D5.4	F54D5.4
Y39G10AR.6	ugt-31
ZC443.4	ZC443.4
R05D8.3	srh-56
F58E1.10	fbxc-22
C29F3.7	C29F3.7
T21E3.2	T21E3.2
Y45F10B.12	Y45F10B.12
R09B5.2	cnc-1
Y39D8A.1	Y39D8A.1
K07A1.6	K07A1.6
F40F9.8	cal-7
Y26D4A.11	Y26D4A.11
T12A7.4	lips-5
Y58A7A.5	Y58A7A.5
F15E6.4	F15E6.4
C24B9.9	dod-3
F23F12.12	F23F12.12
T08E11.4	math-41
T26C5.1	gst-13
D1054.12	srh-184
F57A10.4	F57A10.4
C15A11.4	C15A11.4

## Sheet: TGF-beta Roberts et al., 2010
Gene list from Roberts et al., 2010 used for the comparison with upregulated nhr-14(tm1473) genes at log fold change > 1
Gene ID	Gene name
R09E12.6	R09E12.6
Y51A2A.1	clec-247
Y19D10A.7	irld-53
K02E2.8	K02E2.8
T21E8.1	pgp-6
C06E1.11	C06E1.11
C41H7.7	clec-3
T05A8.2	T05A8.2
Y38E10A.5	clec-4
Y38C9B.1	cyp-29A3
F56A4.2	F56A4.2
ZC376.4	ceh-74
F11A6.2	scrm-4
Y58A7A.5	Y58A7A.5
F15E11.10	srbc-15
F35C5.9	clec-66
ZK1290.12	wrt-1
R01H10.8	cnk-1
K09F5.2	vit-1
C29F3.2	wrt-8
T09F5.9	clec-47
W09B7.2	W09B7.2
Y43D4A.6	Y43D4A.6
R09H10.5	R09H10.5
F55G11.4	F55G11.4
F36G9.12	oac-20
C29F3.5	clec-230
C32D5.2	sma-6
F08H9.5	clec-227
F56A12.2	F56A12.2
Y69A2AR.25	Y69A2AR.25
F14B6.6	F14B6.6
F15E11.12	pud-4
Y73F8A.1	pkd-2
K08F9.1	K08F9.1
Y43F8B.5	scl-21
T01C8.3	T01C8.3
C07G3.2	irg-1
F15E11.15	pud-3
F57G4.5	F57G4.5
F17B5.1	F17B5.1
C05A9.1	pgp-5
T11F9.4	aat-6
F55G11.5	dod-22
K04C1.4	mlc-6
C41H7.5	C41H7.5
F37B1.5	gst-16
F40G9.4	btb-1
K08D8.5	K08D8.5
Y39A3B.4	srd-66
K10C2.1	K10C2.1
K01A2.3	K01A2.3
F01D5.1	F01D5.1
F55G11.2	F55G11.2
T05E12.7	srh-237
W09B7.1	W09B7.1
C18D4.6	C18D4.6
F35C5.6	clec-63
F35C5.8	clec-65
F48G7.5	F48G7.5
B0365.6	clec-41
K01G12.1	K01G12.1
F52F10.4	oac-32
F36D3.9	cpr-2
Y46C8AL.2	clec-174
C32B5.13	C32B5.13
C49G7.5	irg-2
C39B5.7	fbxa-12
Y70C5A.2	Y70C5A.2
Y34D9A.2	npr-23
C32H11.12	dod-24
F41E6.9	vps-60
Y38E10A.4	clec-8
T07D4.3	rha-1
K12C11.3	K12C11.3
K03A1.5	sur-5
F07G6.8	F07G6.8
T16G12.1	T16G12.1
M02F4.7	clec-265
K08D8.4	K08D8.4
F56D6.2	clec-67
C29F9.3	pals-23
C03H5.1	clec-10
4R79.2	4R79.2
F08H9.7	clec-56
R11G11.14	lipl-3
C46F2.1	C46F2.1
T24A6.13	srbc-68
F19B2.5	F19B2.5
Y38E10A.16	nspe-5
T08H4.2	T08H4.2
F49F1.10	F49F1.10
F07E5.4	F07E5.4
Y48G1BM.6	Y48G1BM.6
F10G2.3	clec-7
C10C5.2	C10C5.2
ZC317.5	srg-68
Y39G8B.5	Y39G8B.5
C41H7.1	C41H7.1
B0353.1	B0353.1
C16C4.5	math-15
C53D5.5	C53D5.5
F37C12.10	F37C12.10
F56D6.1	clec-68
K07E8.3	sdz-24
Y38E10A.14	Y38E10A.14
Y71A12B.2	Y71A12B.2
T24E12.1	T24E12.1
B0348.2	B0348.2
C49A1.4	eya-1
F44D12.9	ent-7
R13H4.1	nphp-4
T28D6.2	tba-7
T05E12.6	T05E12.6
C08E3.1	C08E3.1
T08E11.4	math-41
F40F8.7	pqm-1
K02E7.2	K02E7.2
F36G9.14	fbxa-99
F53F1.6	F53F1.6
C33D12.2	cnnm-3
W04A8.6	W04A8.6
F37B4.7	folt-2
F54B11.11	F54B11.11
T04F8.7	T04F8.7
ZK896.5	ZK896.5
Y46C8AL.17	not found
Y22F5A.5	lys-2
R03A10.3	mocs-1
K10D11.1	dod-17
T03E6.5	srh-269
Y48A6C.1	Y48A6C.1
F35C5.7	clec-64
F35E12.2	F35E12.2
F39H12.2	F39H12.2
C14C6.5	C14C6.5
F55A12.7	apm-1
Y105C5B.15	Y105C5B.15
C08E3.13	C08E3.13
T04F3.2	T04F3.2
F37B4.2	ifc-1
H02K04.1	clec-229
ZK856.5	ZK856.5
Y39G8B.2	Y39G8B.2
Y69A2AR.13	Y69A2AR.13
F28C12.7	sra-22
Y105C5A.13	Y105C5A.13
Y22D7AR.12	Y22D7AR.12
C07A12.5	spr-3
K11E4.2	K11E4.2
Y51H1A.2	cup-14
T09H2.1	cyp-34A4
F07H5.9	pho-13
T05F1.11	T05F1.11
H41C03.3	H41C03.3
F57A10.1	str-9
F22A3.5	ceh-60
F19C7.4	F19C7.4
K08D8.3	K08D8.3
T01B6.1	T01B6.1
C01F6.6	nrfl-1
F15A4.8	chil-28
F22E5.4	sri-47
F49E11.10	scl-2
M01H9.1	trx-3
W03A5.6	W03A5.6
ZC190.1	cln-3.3
C39E6.6	npr-1
Y41D4B.17	Y41D4B.17
ZK370.2	sma-2
T19D12.1	T19D12.1
T25F10.2	dbl-1
Y45G12C.9	srd-72
Y38H6C.5	dct-10
M01F1.5	hmit-1.3
F35C8.2	sek-4
AH9.1	AH9.1
Y58A7A.3	Y58A7A.3
D2045.8	D2045.8
F26D10.12	clec-196
C30G12.2	C30G12.2
T09F5.11	fbxa-84
K05F6.10	K05F6.10
F46C3.3	hum-4
C45G7.3	ilys-3
F55G11.3	F55G11.3
F45H11.2	ned-8
F38E11.4	cutl-17
T10H9.5	pmp-5
T05E12.5	T05E12.5
C11G10.2	C11G10.2
Y9C9A.8	Y9C9A.8
F35E8.8	gst-38
M28.4	M28.4
F57G4.6	F57G4.6
C11E4.5	C11E4.5
C05B5.2	C05B5.2
R09D1.11	chil-23
F19C7.2	F19C7.2
Y56A3A.27	top-3
C35861_rc	not found
C52E2.5	C52E2.5
Y43F8C.6	Y43F8C.6
							(4 domains)
							homology) domain
							PH

## Sheet: elt-2 Block et al., 2015
Gene list from Block et al., 2015 used for the comparison with upregulated nhr-14(tm1473) genes at log fold change > 1
Gene ID	Gene name
CD4.4	vps-37
D2023.5	mpst-1
C42C1.2	ppm-1.H
C16H3.2	lec-9
Y39G10AR.6	ugt-31
F11G11.2	gst-7
T06D4.1	T06D4.1
F13B9.8	fis-2
Y55B1BR.3	cec-8
Y73B6BL.9a	Y73B6BL.9a
F26H11.2b	F26H11.2b
H13N06.5	zipt-7.2
M163.3	his-24
Y43C5A.2	Y43C5A.2
T25C12.3	T25C12.3
C01B10.6a	C01B10.6a
ZK287.2	sulp-8
ZK892.2	nlt-1
Y41E3.2	dpy-4
T05A7.4	hmg-11
F40F4.3	lbp-1
C29F7.2	C29F7.2
Y18D10A.23	Y18D10A.23
F54F2.7	F54F2.7
F35C5.9	clec-66
C18H9.6	C18H9.6
F19C7.1	F19C7.1
Y22F5A.5	lys-2
VZK822L.1	fat-6
C28C12.5	spp-8
M02F4.7	clec-265
H34I24.2	H34I24.2
M04G12.2	cpz-2
F35E12.7	dct-17
F35E12.6	F35E12.6
K11D2.2	asah-1
F55G11.5	dod-22
C03F11.3	scav-1
R06B10.3	clec-150
K06A4.7	K06A4.7
F43G6.11a	F43G6.11a
K11C4.4	odc-1
C23H3.3	ascc-1
C18G1.2	elt-7
C42D4.1	C42D4.1
ZK6.10	dod-19
T28H10.3	T28H10.3
C50F7.5	C50F7.5
Y46C8AL.2	clec-174
B0554.6	dod-20
C49C8.5	C49C8.5
C32H11.12	dod-24
F35C5.6	clec-63
T08A9.12	spp-2
Y47H9C.1	Y47H9C.1
H02F09.3	H02F09.3
F09B9.1	oac-14
C55F2.2	ilys-4
F53A9.8	F53A9.8
ZK1240.3	ZK1240.3
Y57G7A.11	Y57G7A.11
ZK896.5	ZK896.5
T25D10.4	T25D10.4
F56F10.1	F56F10.1
T26C12.3	T26C12.3
T02C5.1	T02C5.1
F27C8.4	spp-18
H22K11.1	asp-3
R07E3.1	R07E3.1
W04C9.1	haf-4
Y37E3.16	fpn-1.1
R07B1.10	lec-8
T06C10.4	flp-10
T01D3.6b	T01D3.6b
B0403.3	B0403.3
F01D5.8	F01D5.8
F53B2.8	F53B2.8
Y51A2D.13b	Y51A2D.13b
Y51A2D.13a	Y51A2D.13a
ZC443.5	ugt-18
F52H3.7a	F52H3.7a
C05A9.1	pgp-5
Y51A2B.1	Y51A2B.1
C08E8.4	C08E8.4
Y60A3A.18	skr-4
C09F12.1	clc-1
Y54G2A.7	Y54G2A.7
ZK520.2	sid-2
F45F2.12	his-8
Y74C9A.2	nlp-40
F31F7.1	F31F7.1
C12D12.1a	C12D12.1a
C07H4.1	C07H4.1
ZK6.11	ZK6.11
W02A2.1	fat-2
C32H11.4	C32H11.4
Y34B4A.6	Y34B4A.6
F22B3.2	his-63
T05H4.6a	T05H4.6a
W02F12.4	W02F12.4
R06C1.4	R06C1.4
Y39G10AR.10	epg-2
VW02B12L.1	vha-6
C35D10.14	clec-5
Y47G6A.25	Y47G6A.25
C07A12.4b	C07A12.4b
T01G9.2a	T01G9.2a
F55G11.7	F55G11.7
JC8.5	cox-11
Y51A2D.10	ttr-25
F08B6.1	F08B6.1
F42F12.3	F42F12.3
C34B2.2	kbp-5
F11G11.1	gst-8
F49E11.10	scl-2
F21F8.3	asp-5
Y48A6B.7	Y48A6B.7
T22H2.6b	T22H2.6b
ZK1251.2	ins-7
C54F6.14	ftn-1
Y53F4B.14	Y53F4B.14
F22B3.1	his-64
F11G11.10	col-17
B0491.2	sqt-1
T12D8.5	T12D8.5
F46F2.3	F46F2.3
F33E2.5	F33E2.5
