# Supplementary material for: NHR-14 loss of function couples intestinal iron uptake with innate immunity in C. elegans through PQM-1 signaling
Source: eLife journal article supplement (doi:10.7554/elife.44674), 2019-09-18
Supplement: supp [file elife-44674-supp-v1.zip › elife_poa_e44674_Figure_6_source_data_3.xlsx]

## Sheet: Overlap
Figure 6 - source data 3: Overlap between upregulated nhr-14(tm1473) genes at log fold change > 1 and published datasets of DAF-16/FoxO-Class II genes. Genes in common are listed below.
Class II DAF-16 genes, Murphy et al., 2003 vs upregulated nhr-14(tm1473) genes			Class II genes, Tepper et al., 2013 vs upregulated nhr-14(tm1473) genes
Gene ID	Gene name		Gene ID	Gene name
C32H11.10	dod-21	dod-21	C32H11.10	dod-21
C49C3.9	C49C3.9	C49C3.9	Y47H10A.5	Y47H10A.5
F49E12.2	dod-23	dod-23	C49C3.9	C49C3.9
C32H11.12	dod-24	dod-24	B0024.4	B0024.4
ZK6.10	dod-19	dod-19	F49E12.2	dod-23
B0365.6	clec-41	clec-41	C32H11.12	dod-24
F54E2.1	F54E2.1	F54E2.1	ZK6.10	dod-19
K08D8.6	K08D8.6	K08D8.6	F33H12.7	F33H12.7
ZK1251.2	ins-7	ins-7	F54E2.1	F54E2.1
C09F12.1	clc-1	clc-1	K08D8.6	K08D8.6
K06G5.1	K06G5.1	K06G5.1	F09B9.1	oac-14
C32H11.9	C32H11.9	C32H11.9	F44G3.10	F44G3.10
Y41D4B.16	hpo-6	hpo-6	C24G7.2	acd-1
C17H12.8	C17H12.8	C17H12.8	K10D11.5	K10D11.5
R13H4.3	pho-8	pho-8	F25E2.4	ifd-2
F35E12.9	F35E12.9	F35E12.9	T24C4.4	T24C4.4
F28B4.3	F28B4.3	F28B4.3	ZK1251.2	ins-7
C31A11.5	oac-6	oac-6	C18H9.6	C18H9.6
K12H4.7	K12H4.7	K12H4.7	C09F12.1	clc-1
F53C11.1	F53C11.1	F53C11.1	F36G9.12	oac-20
T19D12.4	T19D12.4	T19D12.4	C32H11.9	C32H11.9
F35E12.7	dct-17	dct-17	F21H7.1	gst-22
T24B8.5	T24B8.5	T24B8.5	F53F1.6	F53F1.6
F55G11.8	F55G11.8	F55G11.8	Y41D4B.16	hpo-6
ZK896.5	ZK896.5	ZK896.5	B0496.7	valv-1
F13D12.6	F13D12.6	F13D12.6	K10D11.3	K10D11.3
T22G5.2	lbp-7	lbp-7	C35D10.14	clec-5
B0554.6	dod-20	dod-20	C17H12.8	C17H12.8
F55G11.5	dod-22	dod-22	R13H4.3	pho-8
F49F1.1	drd-50	drd-50	C34B7.3	cyp-36A1
F56D6.2	clec-67	clec-67	C31A11.5	oac-6
W01A11.4	lec-10	lec-10	F01D5.3	F01D5.3
EGAP2.3	pho-1	pho-1	C16D9.4	C16D9.4
W05E10.4	tre-3	tre-3	T26C12.6	clec-173
W02B12.1	W02B12.1	W02B12.1	F53C11.1	F53C11.1
K04E7.2	pept-1	pept-1	F27E5.1	asah-2
F54F11.2	nep-17	nep-17	F58E6.7	hrg-3
K10D11.1	dod-17	dod-17	F09C8.1	F09C8.1
			F25A2.1	F25A2.1
			K10D11.6	K10D11.6
			K11H12.4	K11H12.4
			F35E8.8	gst-38
			C34H4.2	C34H4.2
			W02G9.4	W02G9.4
			T24B8.5	T24B8.5
			C44B7.8	pmp-1
			R09D1.11	chil-23
			Y75B8A.28	Y75B8A.28
			C24G7.1	delm-2
			R06B10.3	clec-150
			T25G12.6	T25G12.6
			F55G11.8	F55G11.8
			F01D4.2	ugt-44
			F09F9.3	F09F9.3
			ZK856.5	ZK856.5
			K08F9.1	K08F9.1
			R07C12.1	R07C12.1
			ZK484.8	nspd-1
			Y46D2A.2	Y46D2A.2
			Y47H9C.1	Y47H9C.1
			F56A4.2	F56A4.2
			ZK896.4	ZK896.4
			W04E12.8	clec-50
			F23F12.3	F23F12.3
			Y75B8A.39	Y75B8A.39
			F13B6.2	F13B6.2
			F19C7.2	F19C7.2
			F58F9.4	F58F9.4
			Y49E10.18	Y49E10.18
			C54D1.2	clec-86
			F49F1.5	F49F1.5
			C49G7.12	C49G7.12
			T22G5.2	lbp-7
			F22E5.1	F22E5.1
			C17H12.6	C17H12.6
			B0554.6	dod-20
			Y102A5B.2	clec-35
			F55G11.5	dod-22
			W02D3.7	lbp-5
			F55G11.4	F55G11.4
			C06C6.4	nhr-63
			F49F1.1	drd-50
			F56D6.2	clec-67
			T12B5.10	fbxa-60
			F16H6.1	clec-42
			F09G8.8	clec-160
			F19C7.4	F19C7.4
			W01A11.4	lec-10
			Y69E1A.2	Y69E1A.2
			F47D12.6	F47D12.6
			T20B3.12	clec-26
			F32H5.1	F32H5.1
			Y38E10A.15	nspe-7
			F07C6.2	F07C6.2
			F48C1.1	aman-3
			F18A12.4	nep-8
			F28G4.1	cyp-37B1
			M01G12.9	M01G12.9
			T20B3.16	clec-36
			T12B3.2	T12B3.2
			F08D12.2	F08D12.2
			C29F4.2	best-7
			C18E9.5	C18E9.5
			Y32F6A.4	Y32F6A.4
			T05E12.3	T05E12.3
			Y54E5A.1	ttm-5
			Y102A5B.1	clec-27
			T05A7.6	T05A7.6
			ZK265.3	ZK265.3
			E02H9.5	klo-2
			F46G10.4	F46G10.4
			Y34B4A.5	Y34B4A.5
			ZC443.6	ugt-16
			C10C5.2	C10C5.2
			W05E10.4	tre-3
			W02B12.1	W02B12.1
			Y17G7B.11	arrd-7
			B0244.10	B0244.10
			T21B6.2	pho-7
			F49H6.3	F49H6.3
			K05F1.3	acdh-8
			C05E11.5	amt-4
			T16D1.2	pho-4
			T08E11.2	math-39
			K10D11.1	dod-17
			F45E4.1	arf-1.1
			ZK1193.2	ZK1193.2
			F10G2.3	clec-7
			F55G11.2	F55G11.2
			C31B8.7	C31B8.7
			B0496.8	tes-1
			F08H9.8	clec-54
			C16C4.5	math-15

## Sheet: Tepper et al., 2013
Gene list from Tepper et al., 2013 used for the comparison with the upregulated nhr-14(tm1473) genes at log fold change > 1
Class II DAF-16 genes Tepper et al., 2013
Gene ID	Gene name
D2096.4.1	D2096.4.1
Y34D9A.10	vps-4
T19B10.4a	not found
D1005.4	D1005.4
B0286.4a.1	ntl-2
M01G12.9	M01G12.9
M01E11.6	klp-15
K10B2.5	ani-2
W09C3.1	W09C3.1
T28A11.21	fbxa-64
R07C12.3	R07C12.3
F49H6.3	F49H6.3
F33G12.5.1	golg-2
C50B6.8	nhr-168
Y38E10A.13	nspe-1
K02B12.3.1	sec-12
C26E6.4	rpb-2
C45E1.4	C45E1.4
F23C8.3	F23C8.3
ZK632.1a	ZK632.1a
C33C12.3a	C33C12.3a
B0252.2	asm-1
C50F7.4	sucg-1
Y54E2A.7	Y54E2A.7
T19C4.5a	T19C4.5a
T08G5.1	T08G5.1
K07F5.8	K07F5.8
Y116A8C.36	itsn-1
F10G7.8.1	rpn-5
C01G5.6	ddi-1
D1022.7c	D1022.7c
T05H10.5a	T05H10.5a
Y37E3.11a	Y37E3.11a
C17C3.12a	C17C3.12a
F16H11.5	nhr-45
C48B6.6a	C48B6.6a
C06B3.7	C06B3.7
F54F2.8.2	prx-19
W03G9.3	enu-3.3
F38A5.12	nspb-2
K03D7.4	srh-261
ZK353.6.1	lap-1
Y106G6G.1	Y106G6G.1
C17F4.5	fbxc-50
B0035.13	B0035.13
F52B5.3	F52B5.3
Y106G6H.7	sec-8
Y38F2AR.9.1	Y38F2AR.9
T05F1.1a	not found
Y54E10A.10.1	Y54E10A.10
F25H2.2	snx-27
F02A9.4a	F02A9.4a
C34E10.5.1	prmt-5
F02E9.2a	F02E9.2a
H03E18.1.1	H03E18.1
C46A5.5	dsb-3
C01H6.9	hasp-1
Y71F9AL.4	Y71F9AL.4
F39H11.5.1	pbs-7
Y66D12A.15	xpb-1
F02E8.6	ncr-1
F37E3.1	ncbp-1
W10G11.11	clec-134
K02F2.1a	K02F2.1a
F44D12.8	F44D12.8
F54C9.9	F54C9.9
Y73B6BL.3	exos-2
W04G3.6a.1	sulp-7
B0511.3	fbxa-125
ZC308.1d	ZC308.1d
B0207.11	B0207.11
R10H1.1	R10H1.1
C32F10.2	lin-35
T21B4.9	srh-70
ZK858.6a	ZK858.6a
T23G5.2b.1	T23G5.2
M199.4	clec-190
F32H2.1a	F32H2.1a
K12H4.8	dcr-1
B0205.11	mrpl-9
C06H5.2	fbxa-157
B0261.1	B0261.1
F55H12.5	F55H12.5
ZK265.3	ZK265.3
Y105C5B.14	Y105C5B.14
R07H5.2a.1	cpt-2
K07A1.10	K07A1.10
R07G3.3a	R07G3.3a
Y51H1A.1a	Y51H1A.1a
F54D5.8	dnj-13
C11D2.4	C11D2.4
R09E12.5	R09E12.5
C14C11.6	mut-14
F13H10.5	F13H10.5
F11A5.9.1	F11A5.9
Y94H6A.2	Y94H6A.2
ZK524.1	spe-4
Y17G7B.5a	Y17G7B.5a
F23A7.8	F23A7.8
F46F11.4	ubl-5
D2092.7	tsp-19
D2045.2	D2045.2
F16A11.3a	F16A11.3a
W07G4.3.1	W07G4.3
Y41D4B.18	Y41D4B.18
F34D10.3	F34D10.3
Y43C5A.6a	Y43C5A.6a
M116.4	sdz-25
T14G10.3	ttr-53
Y37D8A.4	Y37D8A.4
F35A5.2	F35A5.2
R07C12.1	R07C12.1
F41C6.5	col-173
C46H11.7	C46H11.7
B0336.6.1	abi-1
F37A8.1	F37A8.1
Y56A3A.15	fbxb-24
C16C2.1	ceh-5
Y47G6A.12	2019-09-01
T07H3.3a	T07H3.3a
C02H6.2	fbxa-105
Y38H6C.21	Y38H6C.21
F44E5.4	F44E5.4
F07C6.2	F07C6.2
K07F5.14	K07F5.14
Y22D7AL.10.1	Y22D7AL.10
C34C6.5a	C34C6.5a
ZC15.10	ZC15.10
B0464.6.1	B0464.6
C36A4.8a	C36A4.8a
Y40C7B.3	Y40C7B.3
ZK863.4.1	usip-1
W08D2.4.1	W08D2.4.1
C32E8.9	C32E8.9
C52B11.5	C52B11.5
C01F6.8b	C01F6.8b
C28G1.4	C28G1.4
Y50E8A.16	haf-7
T12B5.10	fbxa-60
T23B12.2	mrpl-4
D1081.9	zhp-2
C03C11.1	C03C11.1
Y62H9A.6	ule-5
K07G5.6.1	fecl-1
Y32H12A.9	Y32H12A.9
K10G6.2	dos-2
F44E2.3	F44E2.3
B0511.8.1	mrps-30
T22C1.6	T22C1.6
C26C6.1a	C26C6.1a
F55F8.9	zipt-2.4
D1081.7a	D1081.7a
Y19D10A.15	srd-75
C41C4.6	ulp-4
F59C6.4.1	exos-3
F59F5.1	slcf-1
W04G3.7	W04G3.7
F01D5.9	cyp-37A1
F45G2.1	nas-1
K08F9.1	K08F9.1
F16A11.2	rtcb-1
C01F6.6b	C01F6.6b
F11A5.2	srh-279
F54E12.2.1	F54E12.2
VH15N14R.1	VH15N14R.1
K02E7.2	K02E7.2
W03G1.3	W03G1.3
MTCE.12	atp-6
F37A4.8	isw-1
F19B10.2	F19B10.2
D1007.3	D1007.3
ZK39.7	clec-98
R11H6.1.1	pes-9
C41C4.2	sre-2
K08D8.3	K08D8.3
T08B2.5d	T08B2.5d
C27A12.2	C27A12.2
F55A4.1	sec-22
F09F9.3	F09F9.3
F56C9.6b	F56C9.6b
K07A12.2	egg-6
D2030.1.1	mans-1
C08F8.1	pfd-1
Y42H9AR.2	Y42H9AR.2
F13H10.2a	F13H10.2a
F08F8.10a	F08F8.10a
Y17G7B.20a	Y17G7B.20a
F46F11.9a	F46F11.9a
C16C10.6	ccdc-55
F58G6.9a	F58G6.9a
C49H3.10	xpo-3
B0041.2a.1	ain-2
W04E12.8	clec-50
R03D7.2	R03D7.2
C32E8.8	ptr-2
Y9D1A.2	Y9D1A.2
F17C11.13	F17C11.13
C44C10.11.1	C44C10.11
C32H11.8	C32H11.8
C32H11.11	C32H11.11
T04B8.5a	T04B8.5a
C07H6.9	C07H6.9
T02E1.3a	T02E1.3a
C14F11.5b	C14F11.5b
AH9.3	AH9.3
Y39G10AR.12a	Y39G10AR.12a
Y75B8A.28	Y75B8A.28
K04H4.1a	K04H4.1a
T09A5.11.1	ostb-1
Y66H1A.2	dpm-1
T01H3.2	T01H3.2
B0361.2a.1	B0361.2
F56F4.8	F56F4.8
Y53F4B.31.1	gst-28
C07E3.1a	C07E3.1a
F32H5.1	F32H5.1
T07D3.9a.1	T07D3.9
B0495.7.2	B0495.7
Y25C1A.7a.1	Y25C1A.7
C43H8.1	arch-1
R05D11.6	paxt-1
F58G11.5.1	tag-65
C34G6.5	cdc-7
F42H10.7a	F42H10.7a
T07A9.11.1	rps-24
ZK250.6	math-48
M03F8.3a	not found
F10C2.5.1	F10C2.5
F01D4.2	ugt-44
F49E2.1a	F49E2.1a
K06A5.7.1	cdc-25.1
ZK666.2	ZK666.2
C55F2.2	ilys-4
F33D11.12	dhhc-3
E02C12.11	E02C12.11
T04A8.15	him-18
D2092.5	maco-1
F46B3.18	ttr-57
F46B3.3	ttr-11
W04A8.7	taf-1
Y106G6E.5.2	Y106G6E.5.2
C16A11.2a.1	C16A11.2
C04H5.7b	C04H5.7b
F14D7.2	F14D7.2
F25E5.1	F25E5.1
F18A11.5	F18A11.5
H03G16.5	H03G16.5
C08B6.8	C08B6.8
C15H9.6.1	C15H9.6.1
Y106G6A.2a	Y106G6A.2a
H32K16.1	slc-36.4
W06B11.2	puf-9
Y46D2A.1	Y46D2A.1
F46F5.7	F46F5.7
T10F2.2	T10F2.2
Y47D3A.1	Y47D3A.1
Y111B2A.20	hut-1
Y54E10A.6	Y54E10A.6
F53B7.3	isy-1
C49C8.2	C49C8.2
ZK686.2	ZK686.2
Y49A3A.1	cept-2
C01G6.6a.1	mtrr-1
C27A12.7a.1	ari-1.2
F07H5.10	F07H5.10
F30A10.5.1	F30A10.5.1
K07A1.11	rba-1
F36G9.3	F36G9.3
F07G6.7	fbxa-53
F22F7.5	ckb-4
F58F9.4	F58F9.4
B0496.2	B0496.2
Y66D12A.10	Y66D12A.10
F28C6.2	aptf-3
F58B3.9.1	ttr-50
M116.1	M116.1
T08B2.9b.2	fars-1
C16D9.5	C16D9.5
T25G3.1	T25G3.1
F35H8.3	zfp-2
T04B8.3	arrd-1
F58B3.4	F58B3.4
E02H9.4	E02H9.4
K02D7.4	dsc-4
T16G12.7	T16G12.7
Y62E10A.17	aptf-2
Y102A5C.29	sri-9
K04G2.1.1	eif-2beta
F33D4.6b	F33D4.6b
F33A8.4.1	F33A8.4
W02A2.7	mex-5
C32B5.10	fbxc-32
C30C11.1	mrpl-32
ZK899.2	ZK899.2
DY3.4a.1	trt-1
C18D4.8	C18D4.8
T23G11.7b	T23G11.7b
F26B1.2e	F26B1.2e
C03D6.4	npp-14
E02H1.3.1	tag-124
C03A7.11	ugt-51
F22B7.5b	F22B7.5b
F40F11.3	F40F11.3
F31C3.3	F31C3.3
Y66H1A.4.1	Y66H1A.4
K02B12.8	zhp-3
K02B12.7	K02B12.7
T03F1.9	hcp-4
Y43H11AL.3	pqn-85
C27A12.3	let-391
B0273.2.1	puf-7
F57B10.11	bag-1
C47B2.2b	C47B2.2b
C26C6.6	C26C6.6
R11F4.1.2	R11F4.1
ZK867.3	spp-22
C35D10.4	coq-8
K11H12.3	K11H12.3
T22F7.1	T22F7.1
C39D10.7.1	C39D10.7
C17E7.12	C17E7.12
K03H1.5	K03H1.5
R10E4.4.1	mcm-5
ZK484.8	nspd-1
W08D2.5	catp-6
C16C8.16	C16C8.16
C25A1.11	aha-1
F40F12.7.3	cbp-3
F26A3.2	ncbp-2
F09E5.8	F09E5.8
C01G12.8	catp-4
F10D7.2.1	F10D7.2
T01G1.1a	T01G1.1a
R11.4	R11.4
F13H10.3c.1	F13H10.3
T22B11.4a	T22B11.4a
Y45G5AM.6	Y45G5AM.6
T22E5.5.2	mup-2
M02D8.3	M02D8.3
Y51A2D.4	hmit-1.1
T24D1.1a	T24D1.1a
F26F4.2	F26F4.2
F42F12.1	nspc-9
C37A2.4a	C37A2.4a
F22E5.6	F22E5.6
T12B5.6a	fbxa-55
T21C12.1f	T21C12.1f
T22C1.5	T22C1.5
D2005.5	drh-3
T01G5.2	ugt-30
M4.1	M4.1
T09B4.10.1	chn-1
C12D8.9	C12D8.9
K04F10.4a.1	bli-4
H05C05.1a.1	H05C05.1
F11A3.1.1	acs-14
K12C11.4	dapk-1
D1046.5.1	D1046.5.1
C27A12.10	mbd-2
C45G3.1	aspm-1
Y60A3A.9	Y60A3A.9
F15C11.2b	F15C11.2b
Y16E11A.1	math-44
B0414.6	glh-3
Y43F8C.12	mrp-7
F59A3.3	mrpl-24
Y22F5A.4.1	lys-1
ZK1248.10	tbc-2
C26C6.8	C26C6.8
F22E10.1	pgp-12
F38A5.9	nspb-5
R10E11.2.1	vha-2
F58A4.4	pri-1
Y106G6D.1	Y106G6D.1
M18.7a.1	aly-3
Y55F3C.6	Y55F3C.6
C17B7.7	C17B7.7
F56A11.5	F56A11.5
Y66D12A.12	ztf-29
Y56A3A.14	sdz-33
F54B11.6	bra-1
M03A1.8	M03A1.8
C47C12.4	miro-2
F22B5.2	eif-3.G
C44E4.8	C44E4.8
ZK484.6	ZK484.6
F14D7.14	F14D7.14
F14D2.4b	not found
T14F9.1.1	vha-15
R05D11.8	edc-3
T13F2.7	sna-2
C03E10.5	clec-223
K06A4.1	nas-3
F53F4.1	F53F4.1
ZK1098.6	ZK1098.6
R160.3	R160.3
F45E4.10a	F45E4.10a
W04A4.2	W04A4.2
K11H12.1	K11H12.1
W03F8.1	tni-4
Y17D7B.2	Y17D7B.2
F26H11.1	kbp-3
B0205.9	B0205.9
W03G1.7a	W03G1.7a
C28G1.1	ubc-23
F21D5.7.1	F21D5.7
F16B4.12a	F16B4.12a
C27F2.9	C27F2.9
B0303.7b	B0303.7b
C54A12.1	ptr-6
F17C11.12a	F17C11.12a
K06A5.6.2	acdh-3
F45H11.3a	F45H11.3a
C34G6.3	C34G6.3
Y39G10AR.6	ugt-31
F52G2.3	F52G2.3
F59B2.6	zif-1
Y75B8A.1	php-3
D1081.2	unc-120
K02F2.4	ulp-5
F44F4.2.1	egg-3
B0041.8.1	B0041.8
F38C2.1	F38C2.1
T28F4.3	T28F4.3
Y46G5A.28	Y46G5A.28
C03B1.14	C03B1.14
F54C9.5.1	rpl-5
C43D7.7	C43D7.7
F07F6.2	F07F6.2
F58H1.1a	F58H1.1a
F20D12.2	F20D12.2
F10E7.3	F10E7.3
C41G6.3	srw-15
C32F10.6	nhr-2
K07C5.6.1	K07C5.6
M03E7.5.1	memb-2
C01G5.8	fan-1
T27F6.7	T27F6.7
T25B9.7	ugt-54
F35D11.4.1	F35D11.4
W02D3.10b	W02D3.10b
F18A1.5	rpa-1
R13D7.2	R13D7.2
R107.1.1	R107.1.1
Y75B12A.2	Y75B12A.2
H02I12.5	memi-3
F28C6.8	F28C6.8
C34B2.2	kbp-5
F54C1.7.1	pat-10
F58B3.3	lys-6
F11A5.6	F11A5.6
Y55F3AM.13	Y55F3AM.13
M01E11.3	rmh-1
C13B4.2.1	usp-14
K10B2.1	lin-23
C46F11.2a	C46F11.2a
F58F12.2	F58F12.2
K04G2.11	scbp-2
F13G3.10	F13G3.10
F11G11.7	dnj-9
C37A2.2	pqn-20
C05D2.8	C05D2.8
Y47D3A.22	mib-1
F56D2.2	F56D2.2
E02D9.1a	E02D9.1a
F55F8.7	F55F8.7
B0205.6	B0205.6
T08B2.8	mrpl-23
Y37E3.16.1	fpn-1.1
ZK673.9	clec-143
C15C8.7	C15C8.7
F02E9.1	F02E9.1
K07A1.15	K07A1.15
T28D6.3	T28D6.3
Y65B4A.8.1	Y65B4A.8
W03B1.4	sars-2
F44E7.8	nhr-142
F14B8.6	F14B8.6
K07G5.1	crml-1
T13H5.5	mrps-18B
T02B11.4.2	T02B11.4.2
W03D2.7	ilys-6
C27A2.6	dsh-2
Y57G11C.47	pnc-2
T05A7.6	T05A7.6
F39H11.3	cdk-8
F11C1.5c.1	F11C1.5
F28B3.7a.1	him-1
T02E1.2	T02E1.2
Y32G9A.1	gst-37
F15E11.13	pud-1.1
T22G5.1	T22G5.1
W02D9.7	W02D9.7
B0511.7	B0511.7
Y47H9C.1	Y47H9C.1
C44C10.3	C44C10.3
B0393.9a	B0393.9a
C54G6.5	spp-17
F57B10.7	tre-1
Y48G1A.4	nol-14
F23A7.4.1	F23A7.4
T02C1.2	T02C1.2
C54G10.2	rfc-1
F36F2.3a	F36F2.3a
C13B4.1a	C13B4.1a
Y105C5B.12b	Y105C5B.12b
Y43F8B.14	Y43F8B.14
C35D10.14	clec-5
F25H5.6.1	mrpl-54
B0001.2	B0001.2
F21F8.6	F21F8.6
T26A5.9.1	dlc-1
Y67H2A.8.1	fat-1
R05G6.10.1	R05G6.10.1
C43E11.9.1	C43E11.9
T24D1.4	tag-179
F26F4.9a	not found
F25G6.8.1	F25G6.8
F56B3.6	F56B3.6
T11F1.5	srw-79
T20B3.16	clec-36
E02H9.7	E02H9.7
F10G8.6	nubp-1
F59G1.3	vps-35
F09F7.3.1	rpc-2
F59C6.11	F59C6.11
F17E5.2	F17E5.2
Y51F10.5	hex-4
W01C8.3	set-19
F53F1.2	F53F1.2
F52B11.2	F52B11.2
F14B4.3	rpoa-2
F28H7.6	irld-6
T10C6.12	his-3
F41G3.20	F41G3.20
T09B4.9	tin-44
M04C3.1b	M04C3.1b
M05D6.7	gbh-2
Y102A5B.2	clec-35
F38A6.1b	F38A6.1b
R11A5.2	nud-2
T04G9.3	ile-2
F43C1.7	F43C1.7
Y49E10.19	ani-1
C31B8.7	C31B8.7
C18E9.2a	C18E9.2a
C07H6.8.1	cux-7
F56F4.1	ttr-58
C30F12.2.1	C30F12.2
F59A7.1	clec-206
Y50D4B.3	Y50D4B.3
C53B4.8b	C53B4.8b
C06G4.1	C06G4.1
C37H5.5.1	C37H5.5
Y71H2AR.1.1	Y71H2AR.1
F33H12.7	F33H12.7
W08D2.7	mtr-4
W04A4.5	W04A4.5
K06H7.9	idi-1
F55C9.7	fbxb-60
C17E4.10a.1	C17E4.10
C05C8.2	krr-1
ZK455.8a	ZK455.8a
C34G6.1	hpo-27
R07B1.3	scav-5
ZK39.6	clec-97
B0336.2.1	arf-1.2
T12B3.2	T12B3.2
F21F8.5	F21F8.5
T22B2.5	T22B2.5
H26D21.2	msh-2
ZK546.1a	ZK546.1a
W10D9.4	nfyb-1
C16A3.10c.3	C16A3.10c.3
Y110A7A.13	chp-1
T20G5.11.1	rde-4
K09H11.7	pgph-1
F55A12.5	F55A12.5
F23B2.11.1	pcp-3
R10D12.9.1	swt-6
K01C8.1.2	K01C8.1
C32F10.8a.1	C32F10.8
R11A8.6	iars-1
F53B7.2	frpr-9
C31H2.2	dpy-8
T25B6.2	nep-22
Y43F4B.5a.1	Y43F4B.5
C32E8.11	ubr-1
R11A5.3	R11A5.3
K01C8.5	gei-14
F28C6.6.1	suf-1
F48C1.2	fbxa-145
Y43F8C.2	nlp-26
Y119D3B.20	fbxa-92
F13H8.2	F13H8.2
F41E7.4	fip-5
T16G12.5	ekl-6
F31E3.3	rfc-4
C01B4.6	C01B4.6
R11A5.1a	R11A5.1a
F54E7.1a	F54E7.1a
C01G10.9	C01G10.9
K03E5.2a	K03E5.2a
W06D11.2	W06D11.2
Y54G2A.3a	Y54G2A.3a
R186.7	pnn-1
D1007.4	D1007.4
Y52B11A.9	dxbp-1
T25D3.4	T25D3.4
T26C12.6	clec-173
T20H4.3a	T20H4.3a
F36H5.2b.1	math-27
F54D5.15a	F54D5.15a
T28F3.9	T28F3.9
ZC262.2a	ZC262.2a
K08C7.5	fmo-2
K07A12.7	mrps-15
F27E11.1	slc-28.1
Y110A7A.17b.1	mat-1
Y113G7B.12	Y113G7B.12
M04F3.5	M04F3.5
F33D11.10.1	F33D11.10
Y49F6B.2	Y49F6B.2
H19N07.1.1	H19N07.1.1
K05F1.3	acdh-8
F10G8.7	ercc-1
C55B7.9.1	C55B7.9.1
ZK1321.3.1	aqp-10
ZK1248.13	ZK1248.13
C12D5.9	C12D5.9
ZK1098.2	ZK1098.2
Y47G6A.27	miro-3
ZK430.2	bpnt-1
ZK1236.5	ZK1236.5
Y70D2A.1	Y70D2A.1
Y48G1C.7	Y48G1C.7
K12D12.2.1	npp-3
Y69A2AR.7a	Y69A2AR.7a
E04A4.4a	E04A4.4a
F27E5.1	asah-2
F26A3.7	F26A3.7
Y49E10.23a	Y49E10.23a
ZK1290.6	rnh-1.1
F38A5.13	dnj-11
Y17D7B.3	Y17D7B.3
C18B2.5a.1	C18B2.5
T22C8.5	sptf-2
T28A8.3	T28A8.3
C31A11.4	srbc-82
M176.2.1	gss-1
F55C12.7.1	tag-234
C13B9.3	copd-1
CC4.3.1	smu-1
C46F2.1	C46F2.1
ZK688.6a.3	ZK688.6a.3
F18A12.4	nep-8
Y57G11C.31	Y57G11C.31
C46A5.9	hcf-1
C15H11.5.1	set-31
F26F4.11	rpb-8
R06B9.6	mig-14
R151.2d.1	R151.2
R12E2.12	mrps-6
F10E7.4	spon-1
Y110A7A.16	elpc-1
R06C7.8	bub-1
Y73C8B.1	Y73C8B.1
C05B5.3	pqn-8
F44C4.3	cpr-4
C17G10.4b	not found
ZK1193.4	ZK1193.4
K07C11.2.1	air-1
F59F5.2a	not found
C26E6.12	C26E6.12
F20D6.6	F20D6.6
D1037.1	D1037.1
M02F4.2	M02F4.2
F13B12.6.1	F13B12.6
R07C12.4	R07C12.4
F41C6.4a	not found
ZK856.5	ZK856.5
ZK177.6	fzy-1
Y39A1A.6	mrpl-22
C27A12.6	ari-1.3
Y102A5B.1	clec-27
C43E11.2a	not found
T20F7.3	T20F7.3
Y113G7B.11	Y113G7B.11
C07F11.1	tol-1
T22A3.2a	not found
T22A3.5	pash-1
C50B6.2.1	nasp-2
C15H9.7	kynu-1
C07D8.6	C07D8.6
C35C5.1	sdc-2
K12C11.1.1	K12C11.1.1
R06C7.5b.2	R06C7.5b.2
C25A1.1	C25A1.1
ZK892.2	nlt-1
ZK1055.1	hcp-1
F48C1.4	F48C1.4
F28C6.4a.3	F28C6.4
Y111B2A.3.2	not found
F21H7.4	clec-233
F20B6.9.2	not found
Y66H1B.4	spl-1
F17C11.10	ctf-4
C55B7.12a	not found
F08F3.3.1	rhr-1
F57A8.2a	not found
Y106G6D.4	Y106G6D.4
Y32H12A.2.1	not found
F43C1.6.2	not found
F54C1.2.1	dom-3
F10E9.4	F10E9.4
T01B11.7.1	oat-1
T17E9.1b	not found
R05D11.5	R05D11.5
C49H3.12	C49H3.12
K10B2.2a	not found
C17F4.2	C17F4.2
C38D9.2	C38D9.2
B0554.3	B0554.3
C28C12.9a.1	not found
C18F10.5	srg-2
C26B2.3b.2	not found
C34B2.10.1	C34B2.10
C15B12.7a	not found
C47E8.4	C47E8.4
F23C8.9	tipn-1
R11G11.12	nhr-210
E03H4.8	E03H4.8
F01F1.9	dnpp-1
Y39A1A.24	Y39A1A.24
Y38E10A.26	nspe-2
F52E1.10	vha-18
K01G5.8a	not found
Y14H12A.1	Y14H12A.1
F21C10.9.1	F21C10.9
F39H2.5.1	mrt-1
F43G9.2a	not found
K02B12.2	K02B12.2
F18E2.1	papl-1
C33H5.13	C33H5.13
K06H7.3.1	vms-1
F33A8.6	ilkp-1
W04A8.5	W04A8.5
M04F3.1.1	rpa-2
F41H10.6a	not found
C27A12.9	C27A12.9
F49D11.1	prp-17
C15H9.9.1	C15H9.9
D1007.8	D1007.8
Y53C12B.3a	not found
Y32F6A.5.1	not found
ZC266.1	ZC266.1
T28F4.1.1	T28F4.1
F59F4.4	acl-1
Y61A9LA.10	Y61A9LA.10
R12E2.8	R12E2.8
C41G7.1a	not found
Y57A10B.3	btb-14
R07E3.6	R07E3.6
Y39A1A.8	swt-4
T05E8.3	let-355
C34E10.11	mrps-26
C25H3.11	C25H3.11
ZC155.7	syx-16
W01B11.3	nol-58
C54D1.4	alh-10
Y110A7A.5	mtm-1
K04C2.2	K04C2.2
T23F6.4.1	not found
T28A8.4	T28A8.4
F29C12.1a	not found
C10A4.4	C10A4.4
F28A10.7	F28A10.7
D1009.1a	not found
C35E7.8	C35E7.8
F26E4.6.1	cox-7C
M04B2.4.1	M04B2.4
C09D1.2	clec-89
C16C4.15	math-10
R12C12.8b	not found
W09D6.5	W09D6.5
W07E6.1	nol-2
F42A10.6	F42A10.6
C08F1.4a	not found
F28B3.8	imb-1
C07H6.4	C07H6.4
K04G7.11.2	not found
C32H11.13	dct-19
Y34B4A.5	Y34B4A.5
T25C8.2.2	act-5
F09E5.3.1	F09E5.3
T11G6.1a.1	hars-1
F42A9.6	F42A9.6
T20F5.2	pbs-4
F49C12.11.1	F49C12.11
T24C4.3	T24C4.3
C06B8.2a	not found
Y39A1A.23.1	not found
Y47G6A.28	tag-63
F58E6.11	F58E6.11
C49G7.10	C49G7.10
C06A6.4a.1	C06A6.4
ZK507.4	dos-1
R09H10.5.1	R09H10.5
K07A1.8.1	ile-1
B0365.5a	not found
F57F5.3	F57F5.3
R03A10.3	mocs-1
Y75B8A.39	Y75B8A.39
R07B1.4	gst-36
F39H2.3.1	F39H2.3
R05F9.12	aagr-2
C12D8.6	fipr-8
D1025.2	gcsh-1
F31D4.3.1	fkb-6
F25B3.4	F25B3.4
F44G3.10	F44G3.10
T05A8.2	T05A8.2
T26C5.2	T26C5.2
F09B12.6	flr-4
T13H5.4	T13H5.4
C14A6.12	C14A6.12
ZK1127.3	ZK1127.3
F55E10.6	drd-5
R12E2.5	inx-16
C03C10.3.1	rnr-2
Y46G5A.21	acl-7
Y40H7A.10	Y40H7A.10
R13A5.4	lgc-12
C06C6.5a	not found
T10E9.8	T10E9.8
F56A3.4	spd-5
F56B3.11a	not found
F44B9.8	F44B9.8
T21B6.2	pho-7
C41C4.8.1	cdc-48.2
C27A12.8.1	ari-1.1
C49G7.12	C49G7.12
R09B3.5.1	mag-1
T19H12.1a	not found
F58B6.1	F58B6.1
Y106G6H.12	duo-3
Y71H2AM.11	Y71H2AM.11
Y94H6A.10	Y94H6A.10
F55H2.2.2	vha-14
F22A3.5	ceh-60
F39H11.2a	not found
F13E6.5	plpp-1.3
T08E11.2	math-39
H20E11.2	H20E11.2
F18F11.1	F18F11.1
T01A4.1a	gcy-28
Y62H9A.4	Y62H9A.4
D2085.6	piga-1
F25H2.13	rtel-1
Y82E9BR.18	Y82E9BR.18
F25E2.2	F25E2.2
C53A3.2	pgph-3
Y69E1A.2	Y69E1A.2
R01H2.5	ger-1
B0205.1a	not found
W09G12.9	W09G12.9
Y46H3B.1	clec-205
C33H5.9	sec-10
D1007.15	D1007.15
C26B2.7	C26B2.7
F28G4.5	oac-18
Y50D4B.4	Y50D4B.4
ZK1127.10.1	cth-2
F13H6.3	F13H6.3
ZK121.1a	not found
M03C11.7.1	prp-3
C05D11.3	txdc-9
F59D8.1	vit-3
K08C7.2.1	fmo-1
Y66H1A.3	mrpl-55
F52B5.5a.1	cep-1
C50F2.3	syf-1
Y41C4A.4a	not found
C49C8.5.2	C49C8.5
C10G8.8a	not found
Y66D12A.24	Y66D12A.24
C35E7.9	C35E7.9
K01C8.7a	not found
ZK370.8	tomm-70
H12D21.10a	not found
T14G10.7.2	hpo-5
C39E9.11	C39E9.11
T16H12.2	T16H12.2
C34E10.10	C34E10.10
T27E4.4.1	fip-2
F36H1.5a	not found
T28B4.4.1	hic-1
Y27F2A.3b	not found
DY3.5	pqn-26
F18C12.2b	not found
M04F3.3	M04F3.3
C18A11.4	C18A11.4
Y51H4A.22	Y51H4A.22
F54D10.8	F54D10.8
W02G9.4	W02G9.4
ZK418.2a	not found
F40F4.4a	not found
F13G3.5a	not found
F27C1.3	F27C1.3
M28.8	M28.8
ZC581.1	nekl-2
F54B3.3.1	atad-3
ZK632.6	cnx-1
F38E9.2	nas-39
C08F8.5	fbxb-9
F01G4.3	skih-2
Y19D10A.16	Y19D10A.16
B0414.2	rnt-1
Y52E8A.4	plep-1
F01G12.2a	not found
C49H3.3.1	C49H3.3
F43E2.8.1	not found
F25G6.9	F25G6.9
Y110A7A.20	ift-20
F55A12.1	wago-2
Y105E8A.3	Y105E8A.3
T04A8.5	ppat-1
R02D3.7	R02D3.7
C34B7.3	cyp-36A1
R03G8.6	R03G8.6
K08D10.9	K08D10.9
Y102A11A.2a	not found
F55G11.6	F55G11.6
B0280.4	odd-1
B0281.5a	not found
ZK593.5	dnc-1
B0379.3a	not found
F28E10.5	F28E10.5
Y47D3A.2	fbxa-128
F26F4.13	kbp-2
F55G11.1	F55G11.1
T28F2.7	acd-5
R09B5.3	cnc-2
D1086.11	D1086.11
Y53C10A.5	Y53C10A.5
K07G5.2	xpa-1
F09G2.1	F09G2.1
Y47D7A.16	rft-1
F09B9.1	oac-14
Y47H9C.7	eif-2Bbeta
C50B6.9	C50B6.9
Y38E10A.15	nspe-7
C01G5.9	C01G5.9
T18H9.2a.1	not found
T21E8.2	pgp-7
F48E3.4	F48E3.4
C42C1.11b	not found
T09B4.2	T09B4.2
F30A10.6	sac-1
F46F11.1a	not found
ZK484.2b	not found
Y54E5A.1	ttm-5
F09E5.11	F09E5.11
F37B12.1	F37B12.1
T10E9.9	acdh-4
F36H5.1.2	not found
C29E4.8.1	let-754
E01A2.4.1	let-504
Y87G2A.17	soem-1
F59D8.2	vit-4
D2023.7	col-158
K03H1.6	ttr-1
F53F4.3	tbcb-1
T01H8.2	T01H8.2
ZK1128.4	gtf-2H3
C43E11.1	acin-1
C36B1.5.1	prp-4
C26E1.2	C26E1.2
F38A1.1	clec-170
Y51A2D.13a	not found
C40A11.1	math-18
T22E7.1a	not found
F44E7.2	pgph-2
R05D11.4	ddx-52
Y39B6A.20.1	asp-1
F22D6.5	prpf-4
Y76A2B.3	acs-5
T09F5.9	clec-47
T07A9.14	T07A9.14
C53B7.2	C53B7.2
D2024.3	elo-3
Y47D7A.1	skr-7
C14B9.4a.1	plk-1
F11A5.8	oac-15
C03G6.15	cyp-35A2
K11D12.4	cpt-4
F11C7.3a	not found
C48B6.2	C48B6.2
T20F10.2a	not found
T27F6.6	T27F6.6
F59B2.7.1	rab-6.1
C03D6.6	lab-1
M03F8.4	galt-1
C49H3.8	arp-11
Y57A10C.6	daf-22
R13H4.4a	not found
ZK896.8	gcy-18
K07C11.7b.1	K07C11.7
F54A3.3	cct-3
R11G11.2a	not found
F36G3.2	F36G3.2
C50F4.6	C50F4.6
C16C4.5	math-15
T04A8.14	emb-5
C10C5.6a.1	daf-15
ZK1240.4	ZK1240.4
C08H9.2b	not found
F17C11.11	F17C11.11
F26H9.5	F26H9.5
F20G4.1	smgl-1
ZK973.2.1	cec-10
Y9D1A.1	Y9D1A.1
R08D7.7	R08D7.7
F52E1.7a	not found
E03G2.2	mrp-3
C54G4.7.2	C54G4.7
Y65B4A.1	cus-2
C10C6.7a	not found
K09D9.1	K09D9.1
B0511.12	B0511.12
C05C8.4	gei-6
Y17G7B.8	Y17G7B.8
F22D6.3a.1	nars-1
C09G1.1	pqn-11
F36A2.1a	not found
D2085.4	etc-1
F59A6.5	F59A6.5
C50F2.7	C50F2.7
ZC308.4a	not found
C34G6.4	pgp-2
C06H2.7	C06H2.7
C06C6.4	nhr-63
Y75B8A.4.1	lonp-2
W07G9.2.1	not found
F01F1.2.1	F01F1.2
F44C8.1	cyp-33C4
Y110A7A.9a	not found
F46G10.4	F46G10.4
C09G4.1.1	not found
C44H9.4	C44H9.4
Y110A7A.8.2	not found
T23G7.4	sec-5
T06E8.1.1	not found
C06A5.3a	not found
F43G6.8	F43G6.8
W09C3.4	W09C3.4
E02C12.6	E02C12.6
C41H7.7	clec-3
T28C6.9	T28C6.9
K04A8.10	K04A8.10
F36H2.2	ent-6
C32F10.5	hmg-3
F08D12.3a	not found
F26A3.8	rrf-1
F54D5.14	smc-6
T11F9.12	T11F9.12
F35G12.3b	not found
Y48C3A.5a	not found
Y62H9A.5	Y62H9A.5
F49C12.14	F49C12.14
C04G6.1b	not found
Y46C8AL.8	clec-74
Y105E8A.19	yars-1
C06A8.4	skr-17
T26A5.5a	not found
T21C9.6	T21C9.6
F44F4.11	tba-4
F16D3.2.1	rsd-6
K07H8.10.1	K07H8.10
F43G9.12	F43G9.12
C55B7.1.2	not found
Y54F10AM.8.1	Y54F10AM.8
C01G6.3	C01G6.3
C49A9.9a.1	C49A9.9
Y57G11C.15	sec-61
Y71F9AL.9.1	Y71F9AL.9
ZC395.3a.1	toc-1
T05F1.9	T05F1.9
C10H11.8	mlst-8
F16H6.1	clec-42
E02H9.5	klo-2
W03D8.11	W03D8.11
Y119D3B.4	fbxa-208
R10E11.8.3	not found
F32E10.2	cec-4
ZC328.4	san-1
Y50D4B.6	Y50D4B.6
F07C4.7	grsp-4
C24G7.1	delm-2
C49A9.6	C49A9.6
F08A8.1a.1	acox-1.1
F11F1.6	mig-18
Y39B6A.24.1	asp-17
C25D7.12	C25D7.12
C01B4.5	srd-61
F42D1.3	sprr-2
F23F12.3	F23F12.3
F55F8.5.1	wdr-12
Y48G8AL.11	haf-6
W04E12.6	clec-49
F01D5.3	F01D5.3
F41G3.10	F41G3.10
ZK455.1.1	aco-1
F25G6.3a.1	not found
Y106G6E.6.1	csnk-1
C16D9.4	C16D9.4
F54C9.2	stc-1
C08F1.5a	not found
C15H9.11.1	C15H9.11
C45G9.5	C45G9.5
C55C2.2	ssp-19
F53C11.1	F53C11.1
ZK265.6	nol-16
T14E8.1b.2	svh-2
C06C3.10	C06C3.10
F53F1.4	F53F1.4
F32H2.5	fasn-1
R04F11.3.2	not found
F44E2.9	F44E2.9
Y22D7AR.13.2	ser-4
F46F11.5.1	vha-10
C09H6.2a	not found
F27C1.6.2	F27C1.6
F42G9.1a	not found
F55F8.2a	not found
F26F4.3	rom-1
C14A4.14	mrps-22
F21D5.2.1	not found
F57B10.8	F57B10.8
C15H11.6.1	nxf-2
T24B1.1	T24B1.1
E01H11.1c	not found
W03D8.8	W03D8.8
F01D4.1	ugt-43
ZK1236.7.2	not found
F49A5.2	clec-31
Y61A9LA.3c	not found
F58E6.7	hrg-3
Y38F2AR.2.1	trap-3
C49G7.8	cyp-35A4
F08F3.4	F08F3.4
ZK525.2	aqp-11
W02D9.5	ssp-37
C34F11.3a.1	ampd-1
F43C9.1	F43C9.1
B0212.3	B0212.3
K12C11.2.1	smo-1
T13F2.1.3	not found
F20G4.2	F20G4.2
Y54G9A.4	zipt-2.3
F36A2.13.1	ubr-5
T06E4.3a	not found
K10D3.3	taf-11.2
T10F2.3	ulp-1
F54D5.4.1	F54D5.4
F37D6.1	mus-101
F14B6.6a	not found
F27D4.5	bckd-1B
C52E12.6	lst-5
Y106G6A.1	Y106G6A.1
Y45F10D.11b	not found
B0024.1	col-149
Y110A7A.6a.1	pfkb-1.1
W09D10.2	tat-3
F56D6.1	clec-68
C52D10.9.1	skr-8
F38A1.7	clec-168
B0496.8	tes-1
F41E7.5	fipr-21
C29F3.6	srx-58
R06B10.3	clec-150
C16A3.7	nfx-1
F18E2.2	abcf-1
Y41D4B.16	hpo-6
C44B7.7	C44B7.7
K10D2.3	cid-1
C34G6.6a	not found
K01D12.13a	not found
Y41C4A.11	Y41C4A.11
K07D4.8	pqn-48
W02D3.2	dhod-1
B0244.10	B0244.10
F56H11.1a.1	fbl-1
C54G4.9	C54G4.9
F39G3.5a	not found
C09H6.3	mau-2
B0310.5	ugt-46
Y110A7A.18	ppw-2
F29D10.4	hum-1
C47A10.5	ddo-1
F45C12.4	btb-9
T24C4.5	T24C4.5
F54D11.1.1	pmt-2
K05G3.3	cah-3
Y106G6H.15	ska-1
C45B2.5.2	not found
C17F3.3	C17F3.3
Y87G2A.5	glp-4
F13H8.9	F13H8.9
C10H11.9	let-502
R05D11.7	snrp-27
C06A5.1	inst-1
Y106G6A.5a	not found
C55B7.11	C55B7.11
F33H2.5	pole-1
F59B1.2.1	F59B1.2
C35A11.4	C35A11.4
F41B5.3	cyp-33C5
K09F5.2	vit-1
F25B3.1	ehbp-1
F57B1.6a	not found
F19C7.5	F19C7.5
F30A10.8b	not found
F17C11.6	F17C11.6
C44C1.5a	not found
Y66D12A.9	Y66D12A.9
H20E11.3a	not found
F21F8.2	asp-11
F25B3.5.1	not found
C05D11.9	C05D11.9
Y73C8C.2	clec-210
K08D8.5	K08D8.5
K07A12.4a	not found
ZK637.14	ZK637.14
F09G8.8	clec-160
F10G8.3.1	rae-1
T08E11.4	math-41
F54E2.1	F54E2.1
K08F11.5.1	miro-1
Y39E4B.12b	not found
F53H4.2	F53H4.2
ZK370.6	ZK370.6
K09C4.1a	not found
T01G6.7	nhr-55
F48C1.1	aman-3
W07G4.5a	not found
K02F2.3	teg-4
F42A10.3	anmt-2
F42G4.5a	not found
F55F8.4.1	cir-1
T21B6.3	T21B6.3
C13F10.7.1	C13F10.7
C17E4.5	pabp-2
ZK1248.11.2	not found
K09F6.6	K09F6.6
T23B12.7	dnj-22
T16G1.7	T16G1.7
ZK686.4	snu-23
Y106G6H.1	Y106G6H.1
C46F11.1a	not found
D1025.8	nspc-17
B0496.7	valv-1
F45D3.5	sel-1
C47D12.6b.2	tars-1
F59B1.8.1	F59B1.8
B0511.10	eif-3.E
C44F1.1	C44F1.1
D1025.9	nspc-19
Y48C3A.4	ztf-22
F23B12.8.1	not found
D2030.7	D2030.7
Y53G8AR.7b	not found
C50F2.6b	not found
F10C2.2	kup-1
C07G3.9.1	not found
D1086.6	D1086.6
C55A6.9	pafo-1
Y106G6D.7	rbm-12
ZK757.1	ZK757.1
C46C11.2a	not found
K10D11.3	K10D11.3
ZK550.2	ZK550.2
F11D5.7	F11D5.7
C52D10.7	skr-9
Y47D3A.17d	not found
C01H6.4	C01H6.4
F16C3.4	F16C3.4
C04G6.5	C04G6.5
B0403.4	pdi-6
D1086.5	D1086.5
C03F11.3	scav-1
D1025.6	nspc-16
F14H3.11	nhr-176
Y39A1C.3.2	cey-4
D1025.7	nspc-18
F43G9.10	mfap-1
Y73E7A.3	Y73E7A.3
C44B7.8	pmp-1
C17E4.2	C17E4.2
K02B12.5	K02B12.5
D2096.1	timm-17B.2
F33D4.1a	F33D4.1a
C13C4.5	spin-1
B0207.4	air-2
C16A3.8	thoc-2
ZK673.1a	ZK673.1a
C10H11.4	ugt-28
T26C5.1	gst-13
R10D12.1	R10D12.1
Y16B4A.2	Y16B4A.2
C25D7.16	C25D7.16
Y58A7A.3	Y58A7A.3
C10C5.2	C10C5.2
C03E10.6	clec-222
F55D12.5	F55D12.5
C12D12.1a	C12D12.1a
F39H11.1	F39H11.1
F56A8.7a	F56A8.7a
F43C1.5	F43C1.5
C53D5.6	imb-3
Y106G6H.9	Y106G6H.9
F28G4.1	cyp-37B1
F56F3.2a	F56F3.2a
T05B11.1	T05B11.1
C43D7.4	C43D7.4
T04F3.4	T04F3.4
R02D3.8	R02D3.8
T24A6.20	T24A6.20
C25A1.3	tag-72
C49G7.3.1	C49G7.3
Y71H2AM.16	pho-9
F45E4.1	arf-1.1
K07C6.5	cyp-35A5
ZK652.11.1	cuc-1
F19C7.3	F19C7.3
F57B7.4	mig-17
F56A6.1b	F56A6.1b
F54D7.2	ept-1
T23D8.9b	T23D8.9b
F11A5.10	glc-1
T27A10.7	cgr-1
C01G8.5a.1	erm-1
C06E1.7	C06E1.7
R05D3.4a	R05D3.4a
F10G2.3	clec-7
T21E8.1a	T21E8.1a
ZK1307.1b.2	ZK1307.1b.2
C24G6.6.1	hpo-15
F14H8.6a	cng-1
Y38H6C.5	dct-10
DC2.5	DC2.5
C30B5.4	rbmx-2
Y39D8A.1a	Y39D8A.1a
ZK250.5a.2	ZK250.5a.2
F19C7.6	F19C7.6
T04F8.2.2	T04F8.2.2
T01E8.5	nrde-2
F15E11.1	pud-2.1
E02H9.3a.1	E02H9.3
T08B1.1	T08B1.1
Y71F9AM.6.2	Y71F9AM.6.2
T12B3.3	T12B3.3
F14F9.4	F14F9.4
C25F9.14	C25F9.14
Y43F8C.13	Y43F8C.13
Y59H11AR.4	Y59H11AR.4
F21H7.1	gst-22
K02G10.7a	K02G10.7a
ZK1151.1g	ZK1151.1g
H02F09.3	H02F09.3
F25A2.1	F25A2.1
T10B11.7a	T10B11.7a
C15C7.5	C15C7.5
C29F3.7a	C29F3.7a
F55G11.4	F55G11.4
C42D8.2a.1	vit-2
C41G7.6	C41G7.6
K09C6.9	K09C6.9
C54D1.2	clec-86
W04C9.4	W04C9.4
T28F3.4a.1	slc-17.4
C46G7.1.1	C46G7.1
F44G3.2	argk-1
C34B4.7	lurp-4
C31C9.1b	C31C9.1b
M6.1b	M6.1b
C41D11.2	eif-3.H
Y37H2A.13	Y37H2A.13
F09C3.1	pes-7
C49G9.1	mec-19
F28D1.1.1	wdr-46
T16G1.4	T16G1.4
C17H12.8	C17H12.8
F55G11.7	F55G11.7
R173.1	cah-5
D2005.4.1	D2005.4
F56A3.3b	F56A3.3b
C05D12.4	C05D12.4
T23H2.5.2	rab-10
ZC376.2	ZC376.2
ZK1193.2	ZK1193.2
K08C7.1	K08C7.1
R10H10.3	R10H10.3
C25A8.4	cht-3
M01E11.4a	M01E11.4a
R09D1.11	chil-23
B0361.3.1	B0361.3
T01H3.1.2	vha-4
K10C2.1	K10C2.1
C49A9.2	C49A9.2
E04D5.4a	E04D5.4a
M60.2.2	endu-2
F23H11.7	F23H11.7
D1037.3.1	ftn-2
F43E2.5.1	msra-1
T14G8.3a	T14G8.3a
ZK177.3	ZK177.3
C26B9.7	C26B9.7
F27D4.4a.1	F27D4.4
C09F12.1	clc-1
Y50D7A.7.1	ads-1
C05C12.3	gtl-1
Y49E10.18	Y49E10.18
F53E10.4	irg-3
C53B4.7a.1	bre-1
T05B11.4	T05B11.4
F08C6.2b	F08C6.2b
C35E7.5a	C35E7.5a
ZC155.4	ZC155.4
Y71H2AM.23.1	tufm-1
T21G5.6	let-383
T21G5.2	T21G5.2
F08D12.2	F08D12.2
C16C10.5	rnf-121
F20G4.3	nmy-2
R04B5.9	ugt-47
F44F4.1	lurp-1
H20E11.1b	H20E11.1
T15B7.1.1	T15B7.1
M199.5	col-135
C48E7.3	lpd-2
F26A3.3	ego-1
C55B6.2	dnj-7
W01A11.4	lec-10
F35E12.10	F35E12.10
F53F1.3	F53F1.3
F32B5.8	cpz-1
T11F9.3	nas-20
C46F11.4	C46F11.4
W03G9.4.1	app-1
T14B4.4a.1	tsp-10
F57F4.3	gfi-1
F21E9.3	ttr-37
F36A2.14	F36A2.14
F47G4.3	gpdh-1
Y43F8C.1	nlp-25
T20B3.12	clec-26
W01A11.5	cpt-6
C47B2.8	prx-11
Y48E1B.8	Y48E1B.8
F49F1.6	mul-1
W06B11.3	dct-11
C17H12.14	vha-8
F53A9.8	F53A9.8
Y51H4A.5	Y51H4A.5
F39E9.1	F39E9.1
T09A5.10.1	lin-5
C42D8.9	C42D8.9
K06A5.4	knl-2
ZK546.14a.1	ZK546.14
F56D6.2	clec-67
W02D7.2	clec-218
R12C12.1a.1	gldc-1
F47C10.6	ugt-32
C05D2.4a	C05D2.4a
K08C7.6	K08C7.6
F13E9.13	F13E9.13
W06B3.1	nmat-1
C32H11.1	irg-6
Y46E12BL.1	tig-3
K02G10.1	dhhc-10
F36A2.3	F36A2.3
B0416.6	gly-13
C52E2.4	C52E2.4
T05E7.1	T05E7.1
F52F10.4	oac-32
F49F1.5	F49F1.5
C37A2.8a	C37A2.8a
D2089.5	gbh-1
K10D11.6	K10D11.6
ZC266.2	ZC266.2
W10G6.2a.1	sgk-1
ZC190.1.1	cln-3.3
C04F6.1.1	vit-5
F53F1.6	F53F1.6
C06C3.4	C06C3.4
ZK1098.7	mrps-23
F28A10.6	acdh-9
T08G5.10	mtl-2
M04C9.4	M04C9.4
C14C11.4	C14C11.4
M03B6.1	M03B6.1
K10D11.2	K10D11.2
F40F9.9	aqp-4
F42A10.7.1	F42A10.7
F22A3.6a	F22A3.6a
F09C8.1	F09C8.1
C37C3.2a.1	C37C3.2a.1
R11A5.7.2	R11A5.7.2
T01C8.3	T01C8.3
T05A12.2.1	T05A12.2.1
ZK265.9	fitm-2
Y46H3B.2	clec-204
F15A2.5	efn-3
T05H4.6.1	T05H4.6.1
C14A6.1	clec-48
K04H4.6a	K04H4.6a
Y47H10A.5	Y47H10A.5
F56D2.5	F56D2.5
C12C8.2b	C12C8.2b
F58G6.3	F58G6.3
B0285.9	ckb-2
R09B5.8	cnc-3
C25D7.5	C25D7.5
C08F11.8	ugt-22
Y45G12C.1	Y45G12C.1
F08H9.8	clec-54
F25E2.4	ifd-2
F25B5.3e	F25B5.3e
F09F3.9.1	cpt-5
F55G1.15	F55G1.15
C02C2.4	slc-17.3
C26C6.5a	C26C6.5a
Y38E10A.5	clec-4
W02H3.1a	W02H3.1a
C03H5.1.1	clec-10
F13B6.2	F13B6.2
Y49C4A.8b.2	Y49C4A.8b.2
T01D3.6a	T01D3.6a
M05B5.4	M05B5.4
F56G4.2	pes-2.1
F58G6.7	F58G6.7
F47D12.6	F47D12.6
F31F7.1a	F31F7.1a
W02D3.7	lbp-5
B0024.14b	B0024.14b
F36G9.11	clec-232
Y58A7A.4	Y58A7A.4
F15E11.14	pud-2.2
F49E12.9a	F49E12.9a
F31D5.5	mth-1
K06A4.5	haao-1
B0218.6	clec-51
C18E3.7c.1	ppw-1
C31H2.4	C31H2.4
Y17G7B.11	arrd-7
ZK742.3	ZK742.3
T24C4.4	T24C4.4
T22H6.2a	T22H6.2a
F56A4.9	irld-35
Y19D10A.7	irld-53
W02D7.12	W02D7.12
F13A7.11	F13A7.11
F21D5.3.1	F21D5.3.1
F56G4.3	pes-2.2
F49F1.7	F49F1.7
F10C1.7a	F10C1.7a
ZK228.3	ZK228.3
Y75B8A.24	Y75B8A.24
T26F2.2	T26F2.2
M7.12	M7.12
F47C10.2	btb-21
W03F8.2	W03F8.2
T13A10.10	aat-4
C27H5.4a	C27H5.4a
ZK6.10	dod-19
M03F4.7a	M03F4.7a
C12D8.5	daf-36
C17H12.6	C17H12.6
T06A1.5	T06A1.5
C06B3.3	cyp-35C1
C29F7.2	C29F7.2
F56D6.15	clec-69
F07H5.9a	F07H5.9a
C10C5.3	C10C5.3
F40F4.6	irg-7
C07E3.9	C07E3.9
C05D12.3a	C05D12.3a
T25G12.6	T25G12.6
F20H11.5	ddo-3
C18H9.6	C18H9.6
K12H4.7b	K12H4.7b
R193.2	R193.2
K07G5.5	K07G5.5
C16C4.4.1	C16C4.4.1
T08E11.3	math-40
F54F3.1	nid-1
C24G7.2	acd-1
H23L24.5	parg-2
F29G6.3b.1	hpo-34
C34H4.2	C34H4.2
F49E12.1	skpo-1
R12E2.9	inx-15
ZK177.8a	ZK177.8a
Y46D2A.2	Y46D2A.2
C45G7.2	ilys-2
F55B11.1	xdh-1
Y48A6B.7	Y48A6B.7
F14D7.6	F14D7.6
C49F5.1.1	sams-1
F28B4.3.1	F28B4.3
R04E5.10b	R04E5.10b
T03E6.7.2	T03E6.7.2
F12B6.2c	F12B6.2c
F53H8.3	F53H8.3
R12E2.4a	R12E2.4a
R102.4a	R102.4a
ZK896.4	ZK896.4
Y39D8C.1	abt-4
C31H5.6a.1	C31H5.6
T05C3.6a	T05C3.6a
T19D12.4a	T19D12.4a
Y32F6A.4	Y32F6A.4
C36C5.5	C36C5.5
B0024.4	B0024.4
C47D2.2	cdd-1
F13D12.6.1	F13D12.6
F47G9.3	cutl-18
C10H11.6a	C10H11.6a
F35E8.11	cdr-1
Y116F11B.3.1	pcp-4
B0379.4c	B0379.4c
F35E8.8	gst-38
Y71H10B.1a.1	Y71H10B.1
B0554.6	dod-20
B0365.6.1	clec-41
K08D10.10	K08D10.10
ZK228.4a	ZK228.4a
E02C12.8a	E02C12.8
C52E4.5	mans-2
H06H21.8a	H06H21.8a
C32H11.3	C32H11.3
W05E10.4	tre-3
T16D1.2	pho-4
C27A7.1a	C27A7.1a
C47A4.2a	C47A4.2a
T21C12.2	hpd-1
C29F7.1	C29F7.1
C44B7.12	C44B7.12
F31F4.15	fbxa-72
ZC443.6	ugt-16
Y71F9B.9a	Y71F9B.9a
C49C3.9	C49C3.9
ZC328.3a	ZC328.3a
C18E9.5	C18E9.5
T22G5.2	lbp-7
C32D5.6	C32D5.6
F58B4.5	F58B4.5
C43D7.5	sdz-6
Y58A7A.5	Y58A7A.5
K05F1.10	K05F1.10
C29F7.3	C29F7.3
F22E5.1	F22E5.1
Y43F8B.9	Y43F8B.9
T09B4.8	T09B4.8
C18C4.3.1	ugt-48
C40H1.7	C40H1.7
T16G12.1	T16G12.1
K11H12.4	K11H12.4
F23B2.12	pcp-2
F22B8.6.1	F22B8.6.1
Y38E10A.14	Y38E10A.14
F07B10.1	cln-3.1
F32A5.3	F32A5.3
C07A9.11	ncx-7
C05A9.1a	C05A9.1a
C29F4.2	best-7
K08D8.6	K08D8.6
F35C5.9	clec-66
F57F4.4.2	F57F4.4
T16G1.6	T16G1.6
ZK896.7	clec-186
T11F9.4a	T11F9.4a
T10B9.7	cyp-13A2
C08B11.4	nrf-6
W02B12.1	W02B12.1
ZK1251.2	ins-7
C42C1.7	oac-59
C10C5.5	C10C5.5
C05E11.5	amt-4
T25C12.3	T25C12.3
R13H4.3	pho-8
M02F4.7	clec-265
F08A8.2	acox-1.2
F56A4.2	F56A4.2
C25F6.3	dpyd-1
F55G11.2	F55G11.2
F36G9.12	oac-20
F35E12.9a	F35E12.9a
F55G11.8	F55G11.8
F08G5.6	irg-4
C47B2.6a	not found
C31A11.5	oac-6
F19C7.4	F19C7.4
T05E12.3	T05E12.3
EGAP2.3.1	pho-1
C32H11.10	dod-21
VW02B12L.1.1	vha-6
B0495.4	nhx-2
K10D11.5	K10D11.5
C32H11.9	C32H11.9
K09D9.2	cyp-35A3
C32H11.4	C32H11.4
T24B8.5	T24B8.5
C10C5.4	C10C5.4
C07A9.4	ncx-6
W07B8.5.1	cpr-5
C07B5.5	nuc-1
F54F11.2a	F54F11.2a
T03D3.1	ugt-53
Y19D10A.9	clec-209
F58G1.4	dct-18
F19C7.2	F19C7.2
K10D11.1	dod-17
K04E7.2.1	pept-1
F49F1.1	drd-50
F28H7.3	F28H7.3
ZK6.11a	ZK6.11a
F35E12.5	irg-5
ZC416.6	ltah-1.2
C32H11.12	dod-24
F55G11.5	dod-22
F49E12.2	dod-23

## Sheet: Murphy et al. 2003
Gene list from Murphy et al., 2003 used for the comparison with the upregulated gene list of RNA-seq dataset of nhr-14(tm1473) mutants at log fold change > 1
Class II DAF-16 genes Murphy et al., 2003
Gene ID	Gene name
B0024.6	gcy-6
B0207.4	air-2
B0207.5	B0207.5
B0281.5	B0281.5
B0365.6	clec-41
B0478.1	jnk-1
B0554.6	dod-20
C01A2.3	oxa-1
C01B7.1	sup-37
C03G6.15	cyp-35A2
C04F5.1	sid-1
C04F6.1	vit-5
C05B5.1	C05B5.1
C05B5.2	C05B5.2
C05D2.8	C05D2.8
C06B3.3	cyp-35C1
C07H6.5	cgh-1
C08B11.4	nrf-6
C08B6.10	C08B6.10
C08F11.8	ugt-22
C08F8.5	fbxb-9
C09F12.1	clc-1
C09G1.1	pqn-11
C09G4.5	mes-6
C10C5.4	C10C5.4
C10C5.5	C10C5.5
C12C8.2	cbl-1
C12D5.9	C12D5.9
C13A3.10	not found
C15C6.3	C15C6.3
C15H9.7	kynu-1
C16A3.10	oatr-1
C16C10.5	rnf-121
C17B7.1	str-63
C17H1.3	pals-2
C17H12.8	C17H12.8
C18A3.2	zipt-3
C24G6.6	hpo-15
C25D7.5	C25D7.5
C25F6.3	dpyd-1
C25H3.11	C25H3.11
C25H3.9	C25H3.9
C28F5.3	C28F5.3
C31A11.5	oac-6
C32E8.11	ubr-1
C32H11.1	irg-6
C32H11.10	dod-21
C32H11.12	dod-24
C32H11.13	dct-19
C32H11.4	C32H11.4
C32H11.9	C32H11.9
C35E7.1	vet-2
C35E7.5	C35E7.5
C37A2.1	not found
C39D10.7	C39D10.7
C39E9.1	scl-4
C42D8.2	vit-2
C44F1.2	gmeb-3
C46A5.5	dsb-3
C46F11.4	C46F11.4
C49C3.9	C49C3.9
C50E3.12	C50E3.12
C52D10.7	skr-9
C52D10.9	skr-8
C54G4.6	dod-18
D1054.10	D1054.10
D1054.11	ule-3
D2045.6	cul-1
E03H4.11	E03H4.11
EGAP2.3	pho-1
F01G12.3	F01G12.3
F02G3.1	ncam-1
F08G5.6	irg-4
F13A7.9	skr-11
F13C5.4	F13C5.4
F13D12.6	F13D12.6
F13H6.3	F13H6.3
F14B6.3	F14B6.3
F15E11.1	pud-2.1
F15E11.12	pud-4
F15E11.9	F15E11.9
F18A1.7	F18A1.7
F18E9.5	jmjd-3.1
F23B2.12	pcp-2
F23H11.7	F23H11.7
F28B4.3	F28B4.3
F28H7.3	F28H7.3
F29G9.1	F29G9.1
F34D10.4	F34D10.4
F35C11.5	F35C11.5
F35E12.10	F35E12.10
F35E12.5	irg-5
F35E12.7	dct-17
F35E12.9	F35E12.9
F35F10.10	F35F10.10
F36F2.1	F36F2.1
F36H5.8	F36H5.8
F40A3.7	F40A3.7
F40F12.2	F40F12.2
F40F12.3	F40F12.3
F40F4.1	fbxb-71
F41A4.1	cutl-28
F44D12.8	F44D12.8
F45C12.7	btb-6
F46E10.1	acs-1
F46F3.3	F46F3.3
F46G10.3	sir-2.3
F47C10.2	btb-21
F49E12.1	skpo-1
F49E12.2	dod-23
F49F1.1	drd-50
F52E1.1	pos-1
F53C11.1	F53C11.1
F53C3.2	fbxb-103
F53F4.8	F53F4.8
F54E2.1	F54E2.1
F54F11.2	nep-17
F54F3.1	nid-1
F55G11.5	dod-22
F55G11.7	F55G11.7
F55G11.8	F55G11.8
F56A4.1	nas-2
F56A4.j	not found
F56D5.5	F56D5.5
F56D6.1	clec-68
F56D6.2	clec-67
F56G4.2	pes-2.1
F56G4.3	pes-2.2
F57C2.4	F57C2.4
F57F4.3	gfi-1
F57F4.4	F57F4.4
F57F5.1	F57F5.1
F58B3.9	ttr-50
F58F6.2	col-105
F58G1.4	dct-18
F59D8.1	vit-3
F59D8.2	vit-4
F59D8.d	not found
H04D03.1	enu-3.1
H12C20.2a	not found
H19N07.1	erfa-3
K01A2.5	K01A2.5
K01C8.5	gei-14
K01G5.3	enu-3.6
K02B12.2	K02B12.2
K02H11.2	str-240
K04E7.2	pept-1
K06A4.1	nas-3
K06B9.4	K06B9.4
K06G5.1	K06G5.1
K08D8.3	K08D8.3
K08D8.5	K08D8.5
K08D8.6	K08D8.6
K08E5.3	mua-3
K09D9.2	cyp-35A3
K09D9.4	srh-6
K10D11.1	dod-17
K10D11.2	K10D11.2
K12H4.7	K12H4.7
M02F4.7	clec-265
M03F4.7	calu-1
M04D8.1	ins-21
M163.3	his-24
M60.1	M60.1
R02E12.8	acr-10
R05F9.10	sgt-1
R102.4b	not found
R107.8	lin-12
R11G1.3	gst-11
R13H4.3	pho-8
T03E6.7	cpl-1
T03F6.1	qdpr-1
T05D4.2	T05D4.2
T09E11.2	nhr-217
T10B11.3	ztf-4
T10C6.8	hpo-42
T10E10.2	col-167
T11F9.12	T11F9.12
T13F2.8	cav-1
T16A9.1	T16A9.1
T16G12.1	T16G12.1
T16G12.4	T16G12.4
T16G12.7	T16G12.7
T16H12.1	T16H12.1
T16H12.8	srt-55
T17A3.7	fbxb-84
T18D3.4	myo-2
T19D12.4	T19D12.4
T21C12.2	hpd-1
T22G5.2	lbp-7
T24B8.5	T24B8.5
T25C12.3	T25C12.3
T25E12.6	T25E12.6
VW02B12L.1	vha-6
W01A11.4	lec-10
W02B12.1	W02B12.1
W03D2.4	pcn-1
W05E10.4	tre-3
W05F2.2	enu-3.4
W06B11.3	dct-11
W08D2.3	dct-15
Y106G6H.10	Y106G6H.10
Y106G6H.9	Y106G6H.9
Y116A8A.2	Y116A8A.2
Y116A8C.17	dct-13
Y116A8C.35	uaf-2
Y14H12B.2	Y14H12B.2
Y19D10A.9	clec-209
Y19D10A.j	not found
Y37D8A.12	enu-3.5
Y38E10A.14	Y38E10A.14
Y38H6C.1	dct-16
Y38H6C.3	dct-14
Y38H6C.5	dct-10
Y39B6B.gg	not found
Y41D4B.16	hpo-6
Y43F4A.3	Y43F4A.3
Y43F8C.16	Y43F8C.16
Y45F10A.2	puf-3
Y46C8_103.a	not found
Y46C8AL.7	Y46C8AL.7
Y46G5A.28	Y46G5A.28
Y46H3C_14.c	not found
Y48A6C.1	Y48A6C.1
Y49E10.1	rpt-6
Y49E10.8	Y49E10.8
Y51H7BR.2	fbxb-43
Y54E10A.2	cogc-1
Y55F3A_747.a	not found
Y55F3A_748.b	not found
Y56A3A.15	fbxb-24
Y57A10C.7	dct-12
Y62H9A.3	Y62H9A.3
Y62H9A.4	Y62H9A.4
Y62H9A.6	ule-5
Y9D1A.1	Y9D1A.1
ZC204.10	fbxb-16
ZC416.6	ltah-1.2
ZK1127.10	cth-2
ZK1127.3	ZK1127.3
ZK1251.2	ins-7
ZK1290.6	rnh-1.1
ZK218.6	nhr-248
ZK6.10	dod-19
ZK757.1	ZK757.1
ZK757.2	ZK757.2
ZK896.5	ZK896.5
ZK896.7	clec-186
ZK896.8	gcy-18

## Sheet: Upregulated PQM-1 ChIPseq
Top 25 upregulated nhr-14(1473) genes vs wild-type N2 with PQM-1 ChIP-seq
Gene ID	Gene Name	log2ratio	padj	PQM-1 Peak qvalue modENCODE (Nui et al., 2011)
WBGene00007873	dod-21	10.2676	9.43827e-288	8.5e-12
WBGene00017806	F26A1.8	8.40341	3.08338e-241
WBGene00004878	smf-3	3.50607	3.84437e-157	1.7e-32
WBGene00006628	tsp-2	4.05962	1.99058e-150	7.6e-22
WBGene00012961	Y47H10A.5	4.05691	3.38271e-142	0.0001
WBGene00006627	tsp-1	3.51204	1.12815e-119	1.8e-06
WBGene00011844	T19C9.8	5.58265	2.18579e-110
WBGene00008199	C49C3.9	2.90321	2.24867e-108	3.5e-24
WBGene00007097	B0024.4	7.43889	4.46973e-103
WBGene00009898	dod-23	3.13785	1.27759e-97	1.6e-08
WBGene00007875	dod-24	3.91007	1.93868e-95
WBGene00045416	Y37H2A.14	4.12251	6.12743e-95
WBGene00012683	asp-17	6.33801	2.59652e-91
WBGene00022644	dod-19	3.09027	6.53616e-87	5.7e-24
WBGene00007153	clec-41	3.31972	1.87504e-83	5e-20
WBGene00015759	C14C6.5	3.20875	9.06068e-74
WBGene00003096	lys-7	3.31827	7.29179e-70	0.001
WBGene00045457	F33H12.7	3.30384	2.08403e-67	1.47e-18
WBGene00194848	T27D12.6	5.27063	1.31635e-64
WBGene00018823	F54E2.1	2.42135	1.8368e-62	1.87e-13
WBGene00010660	K08D8.6	2.1854	8.83293e-57	1.6e-06
WBGene00008850	F15B9.6	4.06595	3.49994e-56
WBGene00008602	oac-14	3.6293	6.81248e-55	1e-66
WBGene00018921	sago-2	3.02971	1.03769e-53

## Sheet: Downregulated PQM-1 ChIPseq
Top 25 downregulated nhr-14(tm1473) genes vs wild-type N2 with PQM-1 ChIP-seq
Gene ID	Gene_name	log2FoldChange	padj	PQM-1 Peak qvalue modENCODE (Nui et al., 2011)
WBGene00012186	mlt-11	-6.20832	5.5541e-104
WBGene00009926	noah-2	-5.24319	1.6335e-103
WBGene00016422	noah-1	-4.20515	9.5439e-88
WBGene00006366	sym-1	-4.75251	1.07741e-70
WBGene00021236	pud-1.2	-3.01129	1.37596e-66
WBGene00017501	pud-3	-4.75713	1.60238e-64	8.8e-41
WBGene00017490	pud-2.1	-3.31692	3.94218e-63
WBGene00012261	lpr-3	-5.86411	1.11722e-60
WBGene00005016	sqt-1	-5.54837	3.94095e-54
WBGene00005017	sqt-2	-4.92006	1.39729e-52
WBGene00000606	col-17	-5.66956	2.89047e-52
WBGene00017498	pud-4	-4.64842	6.8549e-51	8.8e-41
WBGene00004264	qua-1	-4.3725	1.15926e-48
WBGene00012256	lpr-5	-5.23963	2.58519e-48
WBGene00018572	lin-42	-4.17456	2.78029e-45
WBGene00020674	T22B7.7	-4.12896	3.72939e-42
WBGene00022816	fbn-1	-3.68939	7.82639e-42
WBGene00004398	rol-8	-5.40612	1.80496e-41
WBGene00004397	rol-6	-4.92983	7.28126e-38
WBGene00010953	clec-190	-2.53894	9.04029e-36
WBGene00018418	F44E2.4	-3.72299	9.97097e-36
WBGene00012257	lpr-4	-4.63035	2.53207e-34
WBGene00007479	C09F9.2	-4.8392	9.06016e-34
WBGene00021095	mlt-8	-3.36096	2.03624e-32
WBGene00019272	H42K12.3	-4.91831	6.12498e-32	0.0014
