# Supplementary material for: NHR-14 loss of function couples intestinal iron uptake with innate immunity in C. elegans through PQM-1 signaling
Source: eLife journal article supplement (doi:10.7554/elife.44674), 2019-09-18
Supplement: supp [file elife-44674-supp-v1.zip › elife_poa_e44674_Figure_6_source_data_4.xls]

## Sheet: UP nhr-14(tm1473) vs mutants
Figure 6 - table supplement 4: Overlap betwee genes nhr-14(tm1473) upregulated genes with published C. elegans mutant datasets using WormExp v1.
Category+A1:O182	Term	Counts	ListSize	PopHit	Pop Size	Pvalue	Bonferroni	FDR	OverlappedID	Refs
Mutants	UP by nhr-8(hd117) mutant	148	568	328	29469	3.28994e-166	2.66156e-163	2.66156e-163	WBGene00006628;WBGene00012961;WBGene00006627;WBGene00011844;WBGene00008199;WBGene00007097;WBGene00007875;WBGene00012683;WBGene00018823;WBGene00008850;WBGene00018921;WBGene00009710;WBGene00010749;WBGene00012101;WBGene00002271;WBGene00021872;WBGene00000783;WBGene00020760;WBGene00019744;WBGene00004811;WBGene00000522;WBGene00005003;WBGene00007872;WBGene00008301;WBGene00021518;WBGene00010747;WBGene000…	http://www.ncbi.nlm.nih.gov/pubmed/23931753
Mutants	UP by hyl-2 mutant	156	568	454	29469	3.91905e-153	3.17051e-150	1.58526e-150	WBGene00006628;WBGene00012961;WBGene00006627;WBGene00011844;WBGene00008199;WBGene00007097;WBGene00007875;WBGene00012683;WBGene00022644;WBGene00007153;WBGene00045457;WBGene00018823;WBGene00010660;WBGene00008850;WBGene00008602;WBGene00009710;WBGene00010749;WBGene00012101;WBGene00021872;WBGene00013119;WBGene00000783;WBGene00020760;WBGene00022645;WBGene00011190;WBGene00008483;WBGene00019261;WBGene000…	https://www.ncbi.nlm.nih.gov/pubmed/27507791
UP by nhr-8(hd117) mutant (Magner et al., 2013)		UP by hyl-2 mutant (Ladage, et al., 2016)
Wormbase ID	Gene name	Wormbase ID	Gene name
WBGene00006628	tsp-2	WBGene00006628	tsp-2
WBGene00012961	Y47H10A.5	WBGene00012961	Y47H10A.5
WBGene00006627	tsp-1	WBGene00006627	tsp-1
WBGene00011844	T19C9.8	WBGene00011844	T19C9.8
WBGene00008199	C49C3.9	WBGene00008199	C49C3.9
WBGene00007097	B0024.4	WBGene00007097	B0024.4
WBGene00007875	dod-24	WBGene00007875	dod-24
WBGene00012683	asp-17	WBGene00012683	asp-17
WBGene00018823	F54E2.1	WBGene00022644	dod-19
WBGene00008850	F15B9.6	WBGene00007153	clec-41
WBGene00018921	sago-2	WBGene00045457	F33H12.7
WBGene00009710	F44G3.10	WBGene00018823	F54E2.1
WBGene00010749	K10D11.5	WBGene00010660	K08D8.6
WBGene00012101	zip-10	WBGene00008850	F15B9.6
WBGene00002271	lec-8	WBGene00008602	oac-14
WBGene00021872	clec-85	WBGene00009710	F44G3.10
WBGene00000783	cpr-3	WBGene00010749	K10D11.5
WBGene00020760	T24C4.4	WBGene00012101	zip-10
WBGene00019744	M02H5.8	WBGene00021872	clec-85
WBGene00004811	skr-5	WBGene00013119	Y51H4A.25
WBGene00000522	clc-1	WBGene00000783	cpr-3
WBGene00005003	spp-18	WBGene00020760	T24C4.4
WBGene00007872	C32H11.9	WBGene00022645	ZK6.11
WBGene00008301	pals-39	WBGene00011190	swt-6
WBGene00021518	hpo-6	WBGene00008483	E04D5.4
WBGene00010747	K10D11.3	WBGene00019261	H34I24.2
WBGene00016450	clec-5	WBGene00019744	M02H5.8
WBGene00008988	F20G2.5	WBGene00000522	clc-1
WBGene00009433	F35E12.9	WBGene00009488	oac-20
WBGene00001158	ech-9	WBGene00010605	K06G5.1
WBGene00007913	cyp-36A1	WBGene00007872	C32H11.9
WBGene00009393	clec-62	WBGene00008301	pals-39
WBGene00017892	F28B4.3	WBGene00021518	hpo-6
WBGene00007833	oac-6	WBGene00010747	K10D11.3
WBGene00015859	C16D9.4	WBGene00015933	C17H12.8
WBGene00008492	F01D5.1	WBGene00044206	T26H5.9
WBGene00009971	F53C11.1	WBGene00021448	Y39D8A.1
WBGene00009192	asah-2	WBGene00003090	lys-1
WBGene00018725	kreg-1	WBGene00008988	F20G2.5
WBGene00015602	fbxa-158	WBGene00009433	F35E12.9
WBGene00008621	F09C8.1	WBGene00001158	ech-9
WBGene00017764	F25A2.1	WBGene00009393	clec-62
WBGene00010750	K10D11.6	WBGene00017892	F28B4.3
WBGene00019660	K11H12.4	WBGene00021503	ctsa-4.2
WBGene00010977	R02D5.3	WBGene00007833	oac-6
WBGene00020579	T19D12.4	WBGene00008494	F01D5.3
WBGene00012910	Y46G5A.20	WBGene00009394	clec-63
WBGene00016190	rcs-1	WBGene00044469	clec-173
WBGene00016425	C34H4.2	WBGene00008492	F01D5.1
WBGene00020954	W02G9.4	WBGene00019682	K12H4.7
WBGene00009431	dct-17	WBGene00009971	F53C11.1
WBGene00007932	zip-5	WBGene00009192	asah-2
WBGene00021121	W09G12.7	WBGene00018725	kreg-1
WBGene00011979	T24B8.5	WBGene00010901	M28.10
WBGene00021339	Y34F4.4	WBGene00010256	hrg-3
WBGene00010128	F55G11.8	WBGene00008621	F09C8.1
WBGene00014136	ZK896.5	WBGene00019605	ctsa-4.1
WBGene00010050	F54D5.4	WBGene00017764	F25A2.1
WBGene00008486	ugt-44	WBGene00010750	K10D11.6
WBGene00008831	F14H3.12	WBGene00019660	K11H12.4
WBGene00008698	F11D11.3	WBGene00001786	gst-38
WBGene00020325	bath-46	WBGene00020954	W02G9.4
WBGene00002274	lec-11	WBGene00044280	W02A2.9
WBGene00010041	F54C9.3	WBGene00009431	dct-17
WBGene00014132	ZK896.1	WBGene00021121	W09G12.7
WBGene00012947	Y47H9C.1	WBGene00011979	T24B8.5
WBGene00018910	F56A4.2	WBGene00044468	Y69A2AL.2
WBGene00014135	ZK896.4	WBGene00004058	pmp-1
WBGene00016281	pals-32	WBGene00013559	Y75B8A.28
WBGene00000212	asm-2	WBGene00020813	T25G12.6
WBGene00018874	tag-234	WBGene00010128	F55G11.8
WBGene00018997	F57B9.3	WBGene00011856	T20D3.2
WBGene00022891	ZK1290.10	WBGene00014136	ZK896.5
WBGene00003091	lys-2	WBGene00015280	C01B10.6
WBGene00004796	sid-2	WBGene00010050	F54D5.4
WBGene00009914	F49H6.13	WBGene00008495	F01D5.5
WBGene00006429	arrd-3	WBGene00008486	ugt-44
WBGene00011517	cgt-1	WBGene00008741	ctsa-1.2
WBGene00021517	Y41D4B.15	WBGene00000712	col-139
WBGene00015537	C06E4.8	WBGene00000703	col-129
WBGene00018645	F49F1.5	WBGene00019213	H20E11.1
WBGene00009796	F46G10.1	WBGene00014132	ZK896.1
WBGene00021253	Y22D7AL.15	WBGene00010473	hrg-2
WBGene00019957	R08E3.1	WBGene00021590	Y46D2A.2
WBGene00004172	pqn-92	WBGene00009957	F53B2.8
WBGene00017703	F22E5.1	WBGene00000657	col-81
WBGene00007694	C23H4.6	WBGene00012947	Y47H9C.1
WBGene00010998	R03G8.3	WBGene00014135	ZK896.4
WBGene00010769	asah-1	WBGene00000212	asm-2
WBGene00015932	C17H12.6	WBGene00012253	clec-50
WBGene00012959	Y47H10A.3	WBGene00017751	F23F12.3
WBGene00008577	F08G2.5	WBGene00018874	tag-234
WBGene00013608	clec-35	WBGene00019430	K06A5.2
WBGene00008632	fbxa-88	WBGene00003091	lys-2
WBGene00010125	dod-22	WBGene00009914	F49H6.13
WBGene00006464	bath-47	WBGene00013037	Y49E10.18
WBGene00005548	sri-36	WBGene00011517	cgt-1
WBGene00010124	F55G11.4	WBGene00004144	pqn-60
WBGene00009432	cld-9	WBGene00018645	F49F1.5
WBGene00015079	B0244.4	WBGene00019957	R08E3.1
WBGene00003653	nhr-63	WBGene00002259	lbp-7
WBGene00008633	fbxa-18	WBGene00017703	F22E5.1
WBGene00018643	drd-50	WBGene00000707	col-133
WBGene00008255	C51E3.10	WBGene00010769	asah-1
WBGene00008891	clec-42	WBGene00015932	C17H12.6
WBGene00013900	ugt-18	WBGene00008577	F08G2.5
WBGene00002273	lec-10	WBGene00009396	clec-65
WBGene00010049	F54D5.3	WBGene00010125	dod-22
WBGene00003092	lys-3	WBGene00000638	col-62
WBGene00021582	clec-71	WBGene00006464	bath-47
WBGene00008167	acox-1.5	WBGene00010124	F55G11.4
WBGene00003640	nhr-50	WBGene00009432	cld-9
WBGene00018562	F47D12.6	WBGene00003653	nhr-63
WBGene00015574	irg-1	WBGene00018643	drd-50
WBGene00008477	clec-17	WBGene00018971	clec-67
WBGene00017302	F09F7.5	WBGene00008255	C51E3.10
WBGene00017471	F14H12.3	WBGene00000639	col-63
WBGene00015152	B0348.2	WBGene00008194	C49C3.4
WBGene00017553	nep-8	WBGene00013900	ugt-18
WBGene00012144	T28H10.3	WBGene00002273	lec-10
WBGene00020449	fbxa-54	WBGene00003092	lys-3
WBGene00000841	cul-6	WBGene00003640	nhr-50
WBGene00013197	ttm-5	WBGene00016785	C49G7.7
WBGene00012069	T26H5.4	WBGene00000748	col-175
WBGene00008229	C50F4.1	WBGene00022490	Y119D3B.13
WBGene00013607	clec-27	WBGene00015574	irg-1
WBGene00011130	zip-6	WBGene00018951	F56C9.7
WBGene00020326	math-38	WBGene00000626	col-49
WBGene00020972	trpl-2	WBGene00004993	spp-8
WBGene00005657	srr-6	WBGene00018594	aman-3
WBGene00007506	C10C5.2	WBGene00021325	Y34B4A.9
WBGene00012464	arrd-7	WBGene00007599	C15A11.7
WBGene00009907	F49H6.3	WBGene00009852	arrd-24
WBGene00007322	C05B5.5	WBGene00013290	Y57G11A.2
WBGene00008498	F01D5.8	WBGene00016134	C26B9.5
WBGene00012028	srz-99	WBGene00019958	R08E3.2
WBGene00001506	fut-2	WBGene00007605	hrg-7
WBGene00010070	nep-17	WBGene00006539	tbb-6
WBGene00005661	srr-10	WBGene00004394	rol-1
WBGene00008644	F10C2.3	WBGene00013771	Y113G7C.1
WBGene00000190	arf-1.1	WBGene00011330	T01D3.6
WBGene00009805	F47B8.4	WBGene00000216	asp-3
WBGene00022848	ZK1055.7	WBGene00008296	cdr-2
WBGene00012027	fbxa-127	WBGene00010070	nep-17
WBGene00015713	C12D12.1	WBGene00010745	dod-17
WBGene00019166	tat-2	WBGene00021627	Y47D7A.15
WBGene00021178	Y9C9A.8	WBGene00017071	aagr-1
WBGene00008493	F01D5.2	WBGene00017591	F19C7.1
		WBGene00016265	trhr-1
		WBGene00012027	fbxa-127
		WBGene00010123	F55G11.2
		WBGene00015713	C12D12.1
		WBGene00000711	col-138
		WBGene00021322	Y34B4A.6
		WBGene00021178	Y9C9A.8
		WBGene00008493	F01D5.2

## Sheet: UP nhr-14(tm1473) mutants
Figure 6 - source data 4: Overlap between upregulated and downregulated nhr-14(tm1473) genes with published C. elegans mutant-specific datasets using WormExp v1.
Category	Term	Counts	List Size	PopHit	Pop Size	Pvalue	Bonferroni	FDR	OverlappedID	Refs
Mutants	UP by nhr-8(hd117) mutant	148	568	328	29469	3.28994e-166	2.66156e-163	2.66156e-163	WBGene00006628;WBGene00012961;WBGene00006627;WBGene00011844;WBGene00008199;WBGene00007097;WBGene00007875;WBGene00012683;WBGene00018823;WBGene00008850;WBGene00018921;WBGene00009710;WBGene00010749;WBGene00012101;WBGene00002271;WBGene00021872;WBGene00000783;WBGene00020760;WBGene00019744;WBGene00004811;WBGene00000522;WBGene00005003;WBGene00007872;WBGene00008301;WBGene00021518;WBGene00010747;WBGene000…	http://www.ncbi.nlm.nih.gov/pubmed/23931753
Mutants	UP by hyl-2 mutant	156	568	454	29469	3.91905e-153	3.17051e-150	1.58526e-150	WBGene00006628;WBGene00012961;WBGene00006627;WBGene00011844;WBGene00008199;WBGene00007097;WBGene00007875;WBGene00012683;WBGene00022644;WBGene00007153;WBGene00045457;WBGene00018823;WBGene00010660;WBGene00008850;WBGene00008602;WBGene00009710;WBGene00010749;WBGene00012101;WBGene00021872;WBGene00013119;WBGene00000783;WBGene00020760;WBGene00022645;WBGene00011190;WBGene00008483;WBGene00019261;WBGene000…	https://www.ncbi.nlm.nih.gov/pubmed/27507791
UP by nhr-8(hd117) mutant		UP by hyl-2 mutant
WBGene00006628	tsp-2	WBGene00006628	tsp-2
WBGene00012961	Y47H10A.5	WBGene00012961	Y47H10A.5
WBGene00006627	tsp-1	WBGene00006627	tsp-1
WBGene00011844	T19C9.8	WBGene00011844	T19C9.8
WBGene00008199	C49C3.9	WBGene00008199	C49C3.9
WBGene00007097	B0024.4	WBGene00007097	B0024.4
WBGene00007875	dod-24	WBGene00007875	dod-24
WBGene00012683	asp-17	WBGene00012683	asp-17
WBGene00018823	F54E2.1	WBGene00022644	dod-19
WBGene00008850	F15B9.6	WBGene00007153	clec-41
WBGene00018921	sago-2	WBGene00045457	F33H12.7
WBGene00009710	F44G3.10	WBGene00018823	F54E2.1
WBGene00010749	K10D11.5	WBGene00010660	K08D8.6
WBGene00012101	zip-10	WBGene00008850	F15B9.6
WBGene00002271	lec-8	WBGene00008602	oac-14
WBGene00021872	clec-85	WBGene00009710	F44G3.10
WBGene00000783	cpr-3	WBGene00010749	K10D11.5
WBGene00020760	T24C4.4	WBGene00012101	zip-10
WBGene00019744	M02H5.8	WBGene00021872	clec-85
WBGene00004811	skr-5	WBGene00013119	Y51H4A.25
WBGene00000522	clc-1	WBGene00000783	cpr-3
WBGene00005003	spp-18	WBGene00020760	T24C4.4
WBGene00007872	C32H11.9	WBGene00022645	ZK6.11
WBGene00008301	pals-39	WBGene00011190	swt-6
WBGene00021518	hpo-6	WBGene00008483	E04D5.4
WBGene00010747	K10D11.3	WBGene00019261	H34I24.2
WBGene00016450	clec-5	WBGene00019744	M02H5.8
WBGene00008988	F20G2.5	WBGene00000522	clc-1
WBGene00009433	F35E12.9	WBGene00009488	oac-20
WBGene00001158	ech-9	WBGene00010605	K06G5.1
WBGene00007913	cyp-36A1	WBGene00007872	C32H11.9
WBGene00009393	clec-62	WBGene00008301	pals-39
WBGene00017892	F28B4.3	WBGene00021518	hpo-6
WBGene00007833	oac-6	WBGene00010747	K10D11.3
WBGene00015859	C16D9.4	WBGene00015933	C17H12.8
WBGene00008492	F01D5.1	WBGene00044206	T26H5.9
WBGene00009971	F53C11.1	WBGene00021448	Y39D8A.1
WBGene00009192	asah-2	WBGene00003090	lys-1
WBGene00018725	kreg-1	WBGene00008988	F20G2.5
WBGene00015602	fbxa-158	WBGene00009433	F35E12.9
WBGene00008621	F09C8.1	WBGene00001158	ech-9
WBGene00017764	F25A2.1	WBGene00009393	clec-62
WBGene00010750	K10D11.6	WBGene00017892	F28B4.3
WBGene00019660	K11H12.4	WBGene00021503	ctsa-4.2
WBGene00010977	R02D5.3	WBGene00007833	oac-6
WBGene00020579	T19D12.4	WBGene00008494	F01D5.3
WBGene00012910	Y46G5A.20	WBGene00009394	clec-63
WBGene00016190	rcs-1	WBGene00044469	clec-173
WBGene00016425	C34H4.2	WBGene00008492	F01D5.1
WBGene00020954	W02G9.4	WBGene00019682	K12H4.7
WBGene00009431	dct-17	WBGene00009971	F53C11.1
WBGene00007932	zip-5	WBGene00009192	asah-2
WBGene00021121	W09G12.7	WBGene00018725	kreg-1
WBGene00011979	T24B8.5	WBGene00010901	M28.10
WBGene00021339	Y34F4.4	WBGene00010256	hrg-3
WBGene00010128	F55G11.8	WBGene00008621	F09C8.1
WBGene00014136	ZK896.5	WBGene00019605	ctsa-4.1
WBGene00010050	F54D5.4	WBGene00017764	F25A2.1
WBGene00008486	ugt-44	WBGene00010750	K10D11.6
WBGene00008831	F14H3.12	WBGene00019660	K11H12.4
WBGene00008698	F11D11.3	WBGene00001786	gst-38
WBGene00020325	bath-46	WBGene00020954	W02G9.4
WBGene00002274	lec-11	WBGene00044280	W02A2.9
WBGene00010041	F54C9.3	WBGene00009431	dct-17
WBGene00014132	ZK896.1	WBGene00021121	W09G12.7
WBGene00012947	Y47H9C.1	WBGene00011979	T24B8.5
WBGene00018910	F56A4.2	WBGene00044468	Y69A2AL.2
WBGene00014135	ZK896.4	WBGene00004058	pmp-1
WBGene00016281	pals-32	WBGene00013559	Y75B8A.28
WBGene00000212	asm-2	WBGene00020813	T25G12.6
WBGene00018874	tag-234	WBGene00010128	F55G11.8
WBGene00018997	F57B9.3	WBGene00011856	T20D3.2
WBGene00022891	ZK1290.10	WBGene00014136	ZK896.5
WBGene00003091	lys-2	WBGene00015280	C01B10.6
WBGene00004796	sid-2	WBGene00010050	F54D5.4
WBGene00009914	F49H6.13	WBGene00008495	F01D5.5
WBGene00006429	arrd-3	WBGene00008486	ugt-44
WBGene00011517	cgt-1	WBGene00008741	ctsa-1.2
WBGene00021517	Y41D4B.15	WBGene00000712	col-139
WBGene00015537	C06E4.8	WBGene00000703	col-129
WBGene00018645	F49F1.5	WBGene00019213	H20E11.1
WBGene00009796	F46G10.1	WBGene00014132	ZK896.1
WBGene00021253	Y22D7AL.15	WBGene00010473	hrg-2
WBGene00019957	R08E3.1	WBGene00021590	Y46D2A.2
WBGene00004172	pqn-92	WBGene00009957	F53B2.8
WBGene00017703	F22E5.1	WBGene00000657	col-81
WBGene00007694	C23H4.6	WBGene00012947	Y47H9C.1
WBGene00010998	R03G8.3	WBGene00014135	ZK896.4
WBGene00010769	asah-1	WBGene00000212	asm-2
WBGene00015932	C17H12.6	WBGene00012253	clec-50
WBGene00012959	Y47H10A.3	WBGene00017751	F23F12.3
WBGene00008577	F08G2.5	WBGene00018874	tag-234
WBGene00013608	clec-35	WBGene00019430	K06A5.2
WBGene00008632	fbxa-88	WBGene00003091	lys-2
WBGene00010125	dod-22	WBGene00009914	F49H6.13
WBGene00006464	bath-47	WBGene00013037	Y49E10.18
WBGene00005548	sri-36	WBGene00011517	cgt-1
WBGene00010124	F55G11.4	WBGene00004144	pqn-60
WBGene00009432	cld-9	WBGene00018645	F49F1.5
WBGene00015079	B0244.4	WBGene00019957	R08E3.1
WBGene00003653	nhr-63	WBGene00002259	lbp-7
WBGene00008633	fbxa-18	WBGene00017703	F22E5.1
WBGene00018643	drd-50	WBGene00000707	col-133
WBGene00008255	C51E3.10	WBGene00010769	asah-1
WBGene00008891	clec-42	WBGene00015932	C17H12.6
WBGene00013900	ugt-18	WBGene00008577	F08G2.5
WBGene00002273	lec-10	WBGene00009396	clec-65
WBGene00010049	F54D5.3	WBGene00010125	dod-22
WBGene00003092	lys-3	WBGene00000638	col-62
WBGene00021582	clec-71	WBGene00006464	bath-47
WBGene00008167	acox-1.5	WBGene00010124	F55G11.4
WBGene00003640	nhr-50	WBGene00009432	cld-9
WBGene00018562	F47D12.6	WBGene00003653	nhr-63
WBGene00015574	irg-1	WBGene00018643	drd-50
WBGene00008477	clec-17	WBGene00018971	clec-67
WBGene00017302	F09F7.5	WBGene00008255	C51E3.10
WBGene00017471	F14H12.3	WBGene00000639	col-63
WBGene00015152	B0348.2	WBGene00008194	C49C3.4
WBGene00017553	nep-8	WBGene00013900	ugt-18
WBGene00012144	T28H10.3	WBGene00002273	lec-10
WBGene00020449	fbxa-54	WBGene00003092	lys-3
WBGene00000841	cul-6	WBGene00003640	nhr-50
WBGene00013197	ttm-5	WBGene00016785	C49G7.7
WBGene00012069	T26H5.4	WBGene00000748	col-175
WBGene00008229	C50F4.1	WBGene00022490	Y119D3B.13
WBGene00013607	clec-27	WBGene00015574	irg-1
WBGene00011130	zip-6	WBGene00018951	F56C9.7
WBGene00020326	math-38	WBGene00000626	col-49
WBGene00020972	trpl-2	WBGene00004993	spp-8
WBGene00005657	srr-6	WBGene00018594	aman-3
WBGene00007506	C10C5.2	WBGene00021325	Y34B4A.9
WBGene00012464	arrd-7	WBGene00007599	C15A11.7
WBGene00009907	F49H6.3	WBGene00009852	arrd-24
WBGene00007322	C05B5.5	WBGene00013290	Y57G11A.2
WBGene00008498	F01D5.8	WBGene00016134	C26B9.5
WBGene00012028	srz-99	WBGene00019958	R08E3.2
WBGene00001506	fut-2	WBGene00007605	hrg-7
WBGene00010070	nep-17	WBGene00006539	tbb-6
WBGene00005661	srr-10	WBGene00004394	rol-1
WBGene00008644	F10C2.3	WBGene00013771	Y113G7C.1
WBGene00000190	arf-1.1	WBGene00011330	T01D3.6
WBGene00009805	F47B8.4	WBGene00000216	asp-3
WBGene00022848	ZK1055.7	WBGene00008296	cdr-2
WBGene00012027	fbxa-127	WBGene00010070	nep-17
WBGene00015713	C12D12.1	WBGene00010745	dod-17
WBGene00019166	tat-2	WBGene00021627	Y47D7A.15
WBGene00021178	Y9C9A.8	WBGene00017071	aagr-1
WBGene00008493	F01D5.2	WBGene00017591	F19C7.1
		WBGene00016265	trhr-1
		WBGene00012027	fbxa-127
		WBGene00010123	F55G11.2
		WBGene00015713	C12D12.1
		WBGene00000711	col-138
		WBGene00021322	Y34B4A.6
		WBGene00021178	Y9C9A.8
		WBGene00008493	F01D5.2

## Sheet: DOWN nhr-14(tm1473) vs mutants
Figure 6 - table supplement 4: Overlap between downregulated nhr-14(tm1473) genes with published C. elegans mutant datasets using WormExp v1.
Category	Term	Counts	ListSize	PopHit	Pop Size	Pvalue	Bonferroni	FDR	OverlappedID	Refs
Mutants	down by elo-5 mutant under C13ISO	189	260	1176	29469	4.84475e-206	3.91941e-203	3.91941e-203	WBGene00012186;WBGene00009926;WBGene00016422;WBGene00006366;WBGene00012261;WBGene00005016;WBGene00005017;WBGene00000606;WBGene00004264;WBGene00012256;WBGene00018572;WBGene00022816;WBGene00004398;WBGene00004397;WBGene00018418;WBGene00012257;WBGene00021095;WBGene00019272;WBGene00001070;WBGene00001064;WBGene00012648;WBGene00022103;WBGene00022679;WBGene00012255;WBGene00001069;WBGene00001074;WBGene000…	http://www.ncbi.nlm.nih.gov/geo/query/acc.cgi?acc=GSE64973
Mutants	down by pmk-1 (km25) (Bond)	143	260	849	29469	1.61706e-149	1.3082e-146	4.36068e-147	WBGene00012186;WBGene00009926;WBGene00016422;WBGene00006366;WBGene00021236;WBGene00017501;WBGene00012261;WBGene00005016;WBGene00005017;WBGene00017498;WBGene00004264;WBGene00012256;WBGene00018572;WBGene00004398;WBGene00004397;WBGene00018418;WBGene00012257;WBGene00021095;WBGene00019272;WBGene00001070;WBGene00001064;WBGene00012648;WBGene00022103;WBGene00022679;WBGene00012255;WBGene00001069;WBGene000…	http://www.ncbi.nlm.nih.gov/pubmed/25474640
Down by elo-5 mutant under C13ISO (Kniazeva et al., (2015)		Down by pmk-1(km25) (Bond et al., 2014)
Wormbase ID	Public name	Wormbase ID	Public name
WBGene00012186	mlt-11	WBGene00012186	mlt-11
WBGene00009926	noah-2	WBGene00009926	noah-2
WBGene00016422	noah-1	WBGene00016422	noah-1
WBGene00006366	sym-1	WBGene00006366	sym-1
WBGene00012261	lpr-3	WBGene00021236	pud-1.2
WBGene00005016	sqt-1	WBGene00017501	pud-3
WBGene00005017	sqt-2	WBGene00012261	lpr-3
WBGene00000606	col-17	WBGene00005016	sqt-1
WBGene00004264	qua-1	WBGene00005017	sqt-2
WBGene00012256	lpr-5	WBGene00017498	pud-4
WBGene00018572	lin-42	WBGene00004264	qua-1
WBGene00022816	fbn-1	WBGene00012256	lpr-5
WBGene00004398	rol-8	WBGene00018572	lin-42
WBGene00004397	rol-6	WBGene00004398	rol-8
WBGene00018418	F44E2.4	WBGene00004397	rol-6
WBGene00012257	lpr-4	WBGene00018418	F44E2.4
WBGene00021095	mlt-8	WBGene00012257	lpr-4
WBGene00019272	H42K12.3	WBGene00021095	mlt-8
WBGene00001070	dpy-8	WBGene00019272	H42K12.3
WBGene00001064	dpy-2	WBGene00001070	dpy-8
WBGene00012648	Y39A1A.9	WBGene00001064	dpy-2
WBGene00022103	cdh-12	WBGene00012648	Y39A1A.9
WBGene00022679	ZK180.5	WBGene00022103	cdh-12
WBGene00012255	lpr-6	WBGene00022679	ZK180.5
WBGene00001069	dpy-7	WBGene00012255	lpr-6
WBGene00001074	dpy-13	WBGene00001069	dpy-7
WBGene00000618	col-41	WBGene00005018	sqt-3
WBGene00008605	mlt-9	WBGene00000618	col-41
WBGene00004219	ptr-4	WBGene00008605	mlt-9
WBGene00044623	bus-8	WBGene00004219	ptr-4
WBGene00001072	dpy-10	WBGene00044623	bus-8
WBGene00000928	dao-2	WBGene00001072	dpy-10
WBGene00014183	ZK1025.3	WBGene00000928	dao-2
WBGene00001066	dpy-4	WBGene00014183	ZK1025.3
WBGene00000402	cdh-10	WBGene00000402	cdh-10
WBGene00009094	F23H12.5	WBGene00009983	cut-2
WBGene00001725	grl-16	WBGene00009094	F23H12.5
WBGene00004120	pqn-32	WBGene00001725	grl-16
WBGene00000722	col-149	WBGene00004120	pqn-32
WBGene00000665	col-90	WBGene00000665	col-90
WBGene00000705	col-131	WBGene00000705	col-131
WBGene00001065	dpy-3	WBGene00001065	dpy-3
WBGene00001071	dpy-9	WBGene00001071	dpy-9
WBGene00017991	clec-180	WBGene00017991	clec-180
WBGene00001067	dpy-5	WBGene00001067	dpy-5
WBGene00017998	F33D4.6	WBGene00017998	F33D4.6
WBGene00021625	Y47D7A.13	WBGene00002282	let-4
WBGene00004133	abu-13	WBGene00021625	Y47D7A.13
WBGene00001068	dpy-6	WBGene00004133	abu-13
WBGene00019148	H03E18.1	WBGene00019148	H03E18.1
WBGene00003175	mec-12	WBGene00014182	ZK1025.2
WBGene00014182	ZK1025.2	WBGene00020194	T03G6.1
WBGene00020194	T03G6.1	WBGene00018969	F56D3.1
WBGene00018969	F56D3.1	WBGene00000039	acn-1
WBGene00004134	myrf-1	WBGene00007999	tag-297
WBGene00000039	acn-1	WBGene00006948	wrt-2
WBGene00007999	tag-297	WBGene00022680	ZK180.6
WBGene00006948	wrt-2	WBGene00003057	lon-3
WBGene00022680	ZK180.6	WBGene00001716	grl-7
WBGene00003057	lon-3	WBGene00019520	K08B12.1
WBGene00001716	grl-7	WBGene00000745	col-172
WBGene00019520	K08B12.1	WBGene00004224	ptr-10
WBGene00019855	R03H10.2	WBGene00004232	ptr-18
WBGene00006534	tba-8	WBGene00020846	T27A10.6
WBGene00000745	col-172	WBGene00017499	pud-1.1
WBGene00004224	ptr-10	WBGene00020554	T19A5.3
WBGene00004232	ptr-18	WBGene00000641	col-65
WBGene00002827	let-653	WBGene00011107	R07E3.6
WBGene00020846	T27A10.6	WBGene00006956	wrt-10
WBGene00010673	K08E7.5	WBGene00015795	C15F1.2
WBGene00001397	fat-5	WBGene00018737	F53B1.4
WBGene00004773	sem-4	WBGene00000220	atf-2
WBGene00000611	col-34	WBGene00020083	R57.2
WBGene00000399	cdh-7	WBGene00022517	ZC123.1
WBGene00008963	F19H8.2	WBGene00015841	skpo-2
WBGene00020554	T19A5.3	WBGene00016013	ugt-66
WBGene00000641	col-65	WBGene00017068	D2092.8
WBGene00011107	R07E3.6	WBGene00017307	F09F9.2
WBGene00044617	bus-1	WBGene00022415	Y102A11A.5
WBGene00006956	wrt-10	WBGene00010835	M03B6.3
WBGene00013173	Y53F4B.27	WBGene00011836	mam-4
WBGene00015339	C02E7.6	WBGene00020033	R12E2.7
WBGene00017421	cutl-29	WBGene00004127	abu-12
WBGene00003681	nhr-91	WBGene00017018	D1014.5
WBGene00015795	C15F1.2	WBGene00019212	zmp-2
WBGene00018737	F53B1.4	WBGene00017716	sups-1
WBGene00000220	atf-2	WBGene00017535	atf-8
WBGene00022517	ZC123.1	WBGene00007916	C34C6.3
WBGene00015841	skpo-2	WBGene00000746	col-173
WBGene00002243	lad-2	WBGene00000702	col-128
WBGene00018297	F41F3.3	WBGene00022591	cuti-1
WBGene00021415	nsy-4	WBGene00011838	T19C4.1
WBGene00010742	K10D6.2	WBGene00050875	bah-1
WBGene00017068	D2092.8	WBGene00008851	F15B9.8
WBGene00017307	F09F9.2	WBGene00012939	subs-4
WBGene00011548	T06G6.6	WBGene00012032	T26C5.2
WBGene00001399	fat-7	WBGene00016133	C26B9.3
WBGene00022415	Y102A11A.5	WBGene00007264	C02F4.4
WBGene00010835	M03B6.3	WBGene00017438	F13H8.5
WBGene00011836	mam-4	WBGene00002393	lpr-1
WBGene00020033	R12E2.7	WBGene00019318	K02E10.4
WBGene00004127	abu-12	WBGene00018487	F46C8.8
WBGene00017018	D1014.5	WBGene00006947	wrt-1
WBGene00017716	sups-1	WBGene00010267	lips-9
WBGene00017535	atf-8	WBGene00003703	nhr-113
WBGene00007916	C34C6.3	WBGene00001690	grd-1
WBGene00000746	col-173	WBGene00019285	cbn-1
WBGene00000702	col-128	WBGene00001714	grl-5
WBGene00022591	cuti-1	WBGene00020560	T19C3.2
WBGene00011838	T19C4.1	WBGene00012429	Y11D7A.5
WBGene00050875	bah-1	WBGene00019759	M03F4.6
WBGene00001557	gcy-37	WBGene00009133	bed-3
WBGene00001079	dpy-20	WBGene00015300	C01F1.5
WBGene00008851	F15B9.8	WBGene00017570	F18E9.4
WBGene00012939	subs-4	WBGene00000493	che-14
WBGene00012032	T26C5.2	WBGene00014009	lips-6
WBGene00022033	Y65B4BL.1	WBGene00015646	mlt-10
WBGene00016133	C26B9.3	WBGene00007552	C13C12.2
WBGene00007264	C02F4.4	WBGene00009218	acs-20
WBGene00017438	F13H8.5	WBGene00012433	Y11D7A.9
WBGene00008762	ztf-2	WBGene00013891	ZC434.3
WBGene00002393	lpr-1	WBGene00015781	C14F11.6
WBGene00019318	K02E10.4	WBGene00001710	grl-1
WBGene00018487	F46C8.8	WBGene00008496	F01D5.6
WBGene00001552	gcy-32	WBGene00020156	T02B11.4
WBGene00006947	wrt-1	WBGene00001691	grd-2
WBGene00010267	lips-9	WBGene00003663	nhr-73
WBGene00003703	nhr-113	WBGene00000902	daf-6
WBGene00001690	grd-1	WBGene00138711	R07B1.13
WBGene00018295	oac-29	WBGene00016329	osr-1
WBGene00019285	cbn-1	WBGene00004229	ptr-15
WBGene00001714	grl-5	WBGene00021389	Y38A10A.2
WBGene00020560	T19C3.2	WBGene00016962	C56C10.4
WBGene00010516	K02E11.7	WBGene00007170	B0393.5
WBGene00012429	Y11D7A.5	WBGene00008292	C54C8.4
WBGene00019759	M03F4.6	WBGene00012540	Y37A1B.7
WBGene00001135	eat-4	WBGene00011235	suro-1
WBGene00009133	bed-3	WBGene00016259	C30F8.3
WBGene00021731	Y49G5A.1	WBGene00018256	cutl-28
WBGene00010345	F59F5.7	WBGene00016196	C28H8.5
WBGene00015300	C01F1.5	WBGene00007210	agmo-1
WBGene00022038	Y65B4BL.6	WBGene00044620	bus-4
WBGene00015523	ztf-30	WBGene00003089	ltd-1
WBGene00000704	col-130
WBGene00001174	egl-5
WBGene00017570	F18E9.4
WBGene00000749	col-176
WBGene00000493	che-14
WBGene00001820	ham-1
WBGene00021023	W04B5.6
WBGene00014009	lips-6
WBGene00015646	mlt-10
WBGene00007552	C13C12.2
WBGene00021529	Y41G9A.5
WBGene00009218	acs-20
WBGene00012433	Y11D7A.9
WBGene00007174	mboa-1
WBGene00013891	ZC434.3
WBGene00015781	C14F11.6
WBGene00001710	grl-1
WBGene00008743	F13D12.9
WBGene00008496	F01D5.6
WBGene00006970	zag-1
WBGene00016671	C45G7.4
WBGene00020855	hpo-36
WBGene00001063	dpy-1
WBGene00001691	grd-2
WBGene00003663	nhr-73
WBGene00000902	daf-6
WBGene00016329	osr-1
WBGene00004229	ptr-15
WBGene00021389	Y38A10A.2
WBGene00021002	W03F9.4
WBGene00000213	asm-3
WBGene00016962	C56C10.4
WBGene00007170	B0393.5
WBGene00008292	C54C8.4
WBGene00012540	Y37A1B.7
WBGene00020728	T23E1.1
WBGene00016619	C43H6.6
WBGene00011235	suro-1
WBGene00016259	C30F8.3
WBGene00014008	ZK596.3
WBGene00000726	col-153
WBGene00000649	col-73
WBGene00016196	C28H8.5
WBGene00007210	agmo-1
WBGene00044620	bus-4
WBGene00003089	ltd-1
