# Supplementary material for: NHR-14 loss of function couples intestinal iron uptake with innate immunity in C. elegans through PQM-1 signaling
Source: eLife journal article supplement (doi:10.7554/elife.44674), 2019-09-18
Supplement: supp [file elife-44674-supp-v1.zip › elife_poa_e44674_Figure_8_source_data_1.xlsx]

## Sheet: Sheet1
Figure 8 - source data 1: Survival statistics for P. aeruginosa strain PA14 lifespan analysis
Strain	Median survival (days)	Number	Significant p-value	Comparison
N2	3	68
nhr-14(tm1473)	4	78	<0.0001	compared to N2
	4	78	<0.0001	compared to smf-3
	4	78	<0.0001	compared to pqm-1(ok485)
smf-3(1035)	2	66	<0.0001	compared to N2
	2	66	<0.0001	compared to nhr-14(tm1473)
pqm-1(ok 485)	3	68	<0.0001	compared to N2
	3	68	<0.0001	compared to nhr-14(tm1473)
	3	68	<0.0001	compared to smf-3
smf-3(1035); nhr-14(1473)	3	59	<0.0001	compared to smf-3(1035)
	3	59	<0.0001	compared to nhr-14(tm1473)
nhr-14(tm1473); Con RNAi	4	47	ns	compared to nhr-14(tm1473)
	4	47	<0.0001	compared to nhr-14(tm1473); pqm-1 RNAi
nhr-14(tm1473); pqm-1 RNAi	3	52	<0.0001	compared to nhr-14(tm1473)
	3	52	0.04	compared to pqm-1(ok485)
Experiment 1	Number of worms alive after PA14 infection (24 h)
	N2	nhr-14(tm1473)	pqm-1(ok 485)	smf-3(1035)	smf-3(1035); nhr-14(1473)	nhr-14(tm1473); Con RNAi	nhr-14(tm1473); pqm-1 RNAi
Day 0	20	25	33	35	27	17	15
Day 1	17	25	33	18	25	17	12
Day 2	12	24	25	15	18	14	11
Day 3	7	17	15	1	11	11	8
Day 4	2	11	9	0	5	7	2
Day 5	0	7	4	0	2	4	1
Day 6	0	2	0	0	0	1	0
Day 7	0	0	0			0	0
Experiment 2	Number of worms alive after PA14 infection (24 h)
	N2	nhr-14(tm1473)	pqm-1(ok 485)	smf-3(1035)	smf-3(1035); nhr-14(1473)	nhr14(tm1473); Con RNAi	nhr-14(tm1473); pqm-1 RNAi
Day 0	31	38	20	18	19	18	17
Day 1	31	38	19	17	19	17	13
Day 2	24	34	15	12	17	14	11
Day 3	15	27	10	6	10	12	9
Day 4	6	20	5	0	2	9	3
Day 5	0	9	0	0	0	6	0
Day 6	0	2	0	0	0	2	0
	0	0	0	0	0	0	0
Experiment 3	Number of worms alive after PA14 infection (24 h)
	N2	nhr-14(tm1473)	pqm-1(ok 485)	smf-3(1035)	smf-3(1035); nhr-14(1473)	nhr-14(tm1473); Con RNAi	nhr-14(tm1473); pqm-1 RNAi
Day 0	17	15	15	13	13	12	20
Day 1	14	15	13	9	12	11	15
Day 2	9	14	11	5	9	9	10
Day 3	6	9	7	2	5	5	3
Day 4	0	5	2	0	1	3	0
Day 5	0	2	0	0	0	2	0
Day 6	0	0	0	0	0	1	0
Day 7	0	0	0	0	0	0	0
Experiments 1-3	Number of worms alive after PA14 infection (24 h)
	N2	nhr-14(tm1473)	pqm-1(ok 485)	smf-3(1035)	smf-3(1035); nhr-14(1473)	nhr14(tm1473); Con RNAi	nhr14(tm1473); pqm-1 RNAi
Day 0	68	78	68	66	59	47	52
Day 1	62	78	65	44	56	45	40
Day 2	45	72	51	32	44	37	32
Day 3	28	53	32	9	26	28	20
Day 4	8	36	16	0	8	19	5
Day 5	0	18	4	0	2	12	1
Day 6	0	4	0	0	0	4	0
Day7	0	0	0	0	0	0	0
