# Supplementary figures and images for: NHR-14 loss of function couples intestinal iron uptake with innate immunity in C. elegans through PQM-1 signaling
Source: eLife journal article supplement (doi:10.7554/elife.44674), 2019-09-18

Figure 4 - figure supplement 2

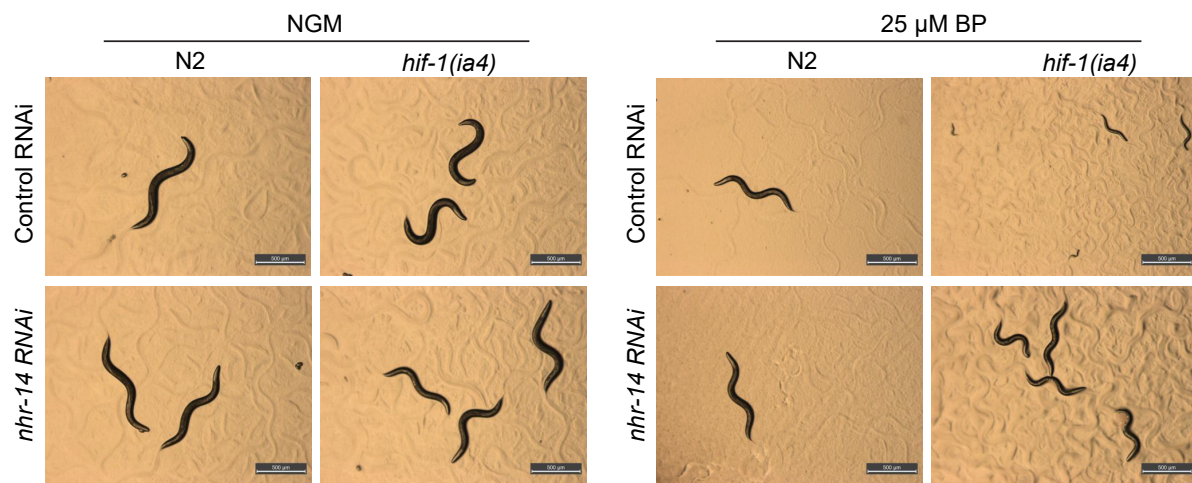

Supplement: supp [file elife-44674-supp-v1.zip]

Figure 4 - figure supplement 3

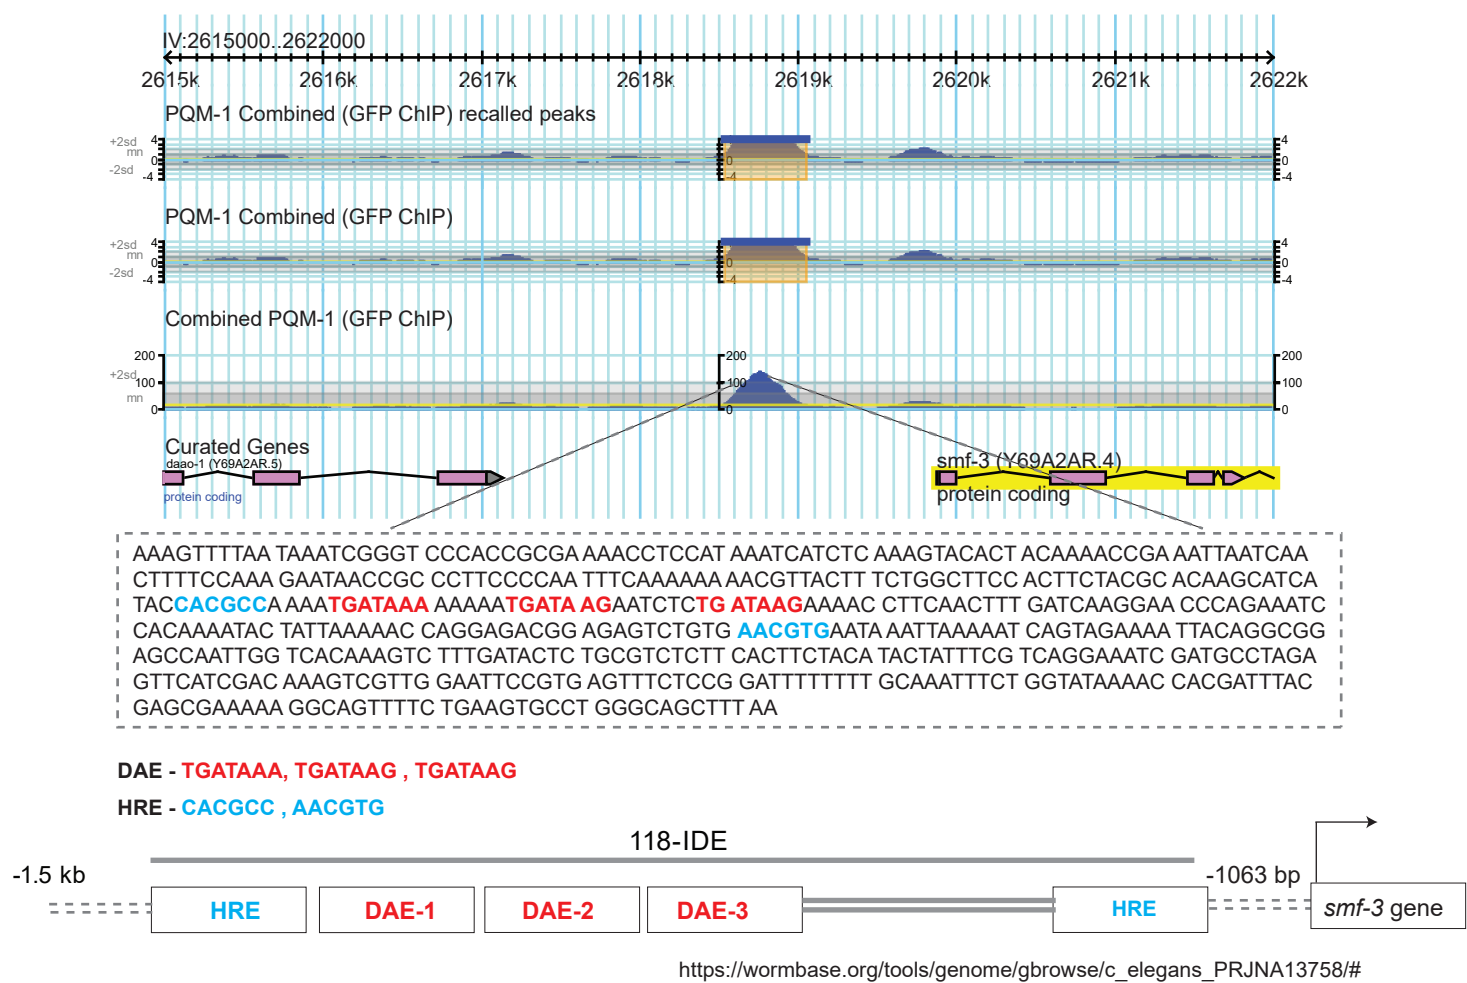

Supplement: supp [file elife-44674-supp-v1.zip]

Figure 2 - figure supplement 1

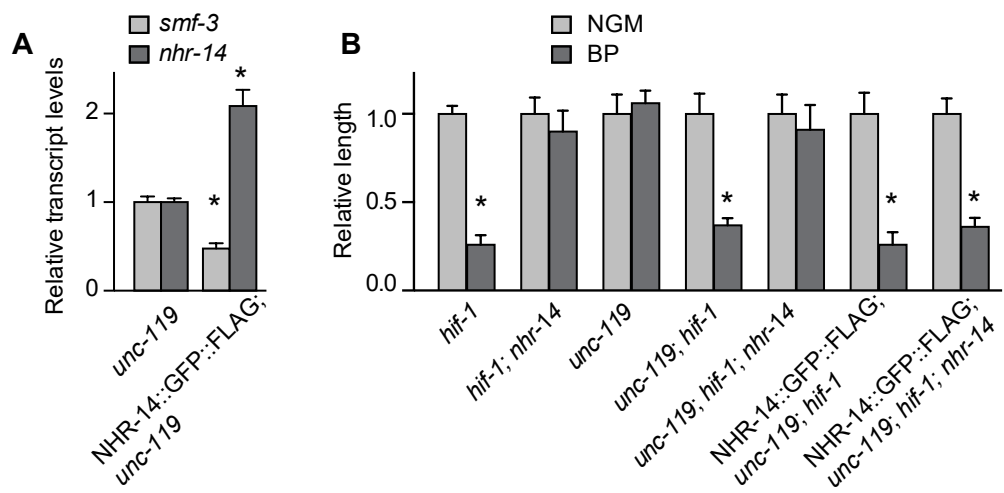

Supplement: supp [file elife-44674-supp-v1.zip]

Figure 2 - figure supplement 2

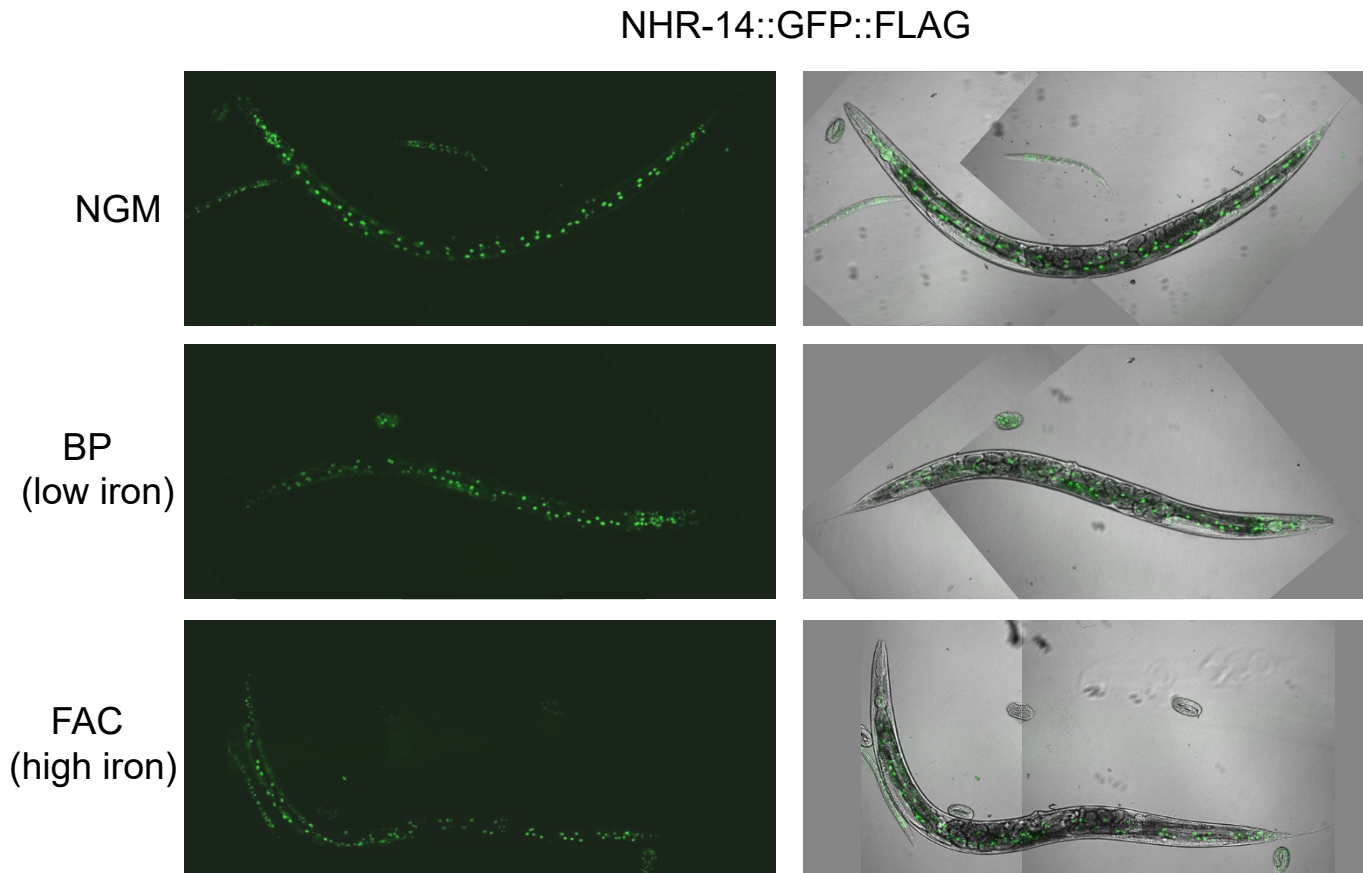

Supplement: supp [file elife-44674-supp-v1.zip]

Figure 4 - figure supplement 1

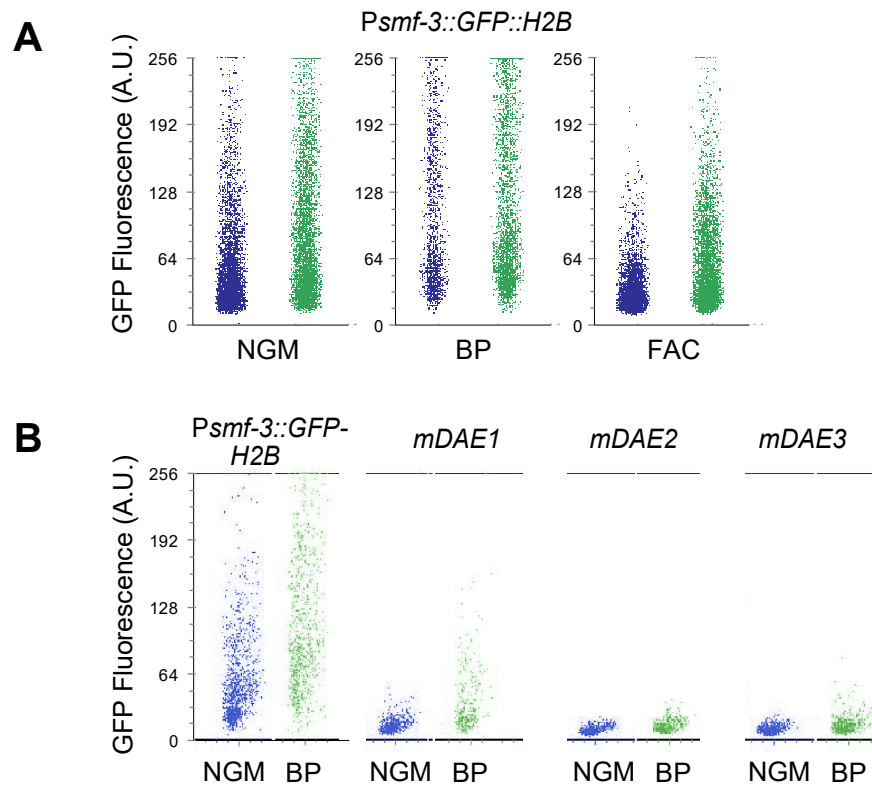

Supplement: supp [file elife-44674-supp-v1.zip › elife_poa_e44674_Figure_4_figure_supplement_1.pdf]
